# Supplementary material
Source: publisher figshare collection journal article supplement (https://acs.figshare.com/ndownloader/files/23748522)
Supplement: Supplementary file 1 [file 23748522]

## Sheet: SupTable1_MS_Data_HBE_Annotatio
Supporting Table S1. Host proteins detected with at least 2 peptides. The indicated levels of expression are log2 ratios to the mean value quantification for the respective proteins in both conditions at every time point of the experiment. Of note, the samples collected at 0 h refer to the host proteome before infection, all the other samples were collected post infection. The color scale goes fr…
Entries	Uniprot	No. Peptides	Protein name (Expand)	Gene name	GO (biological process)	KEGG Pathway	Non-polarized_x000D_ 0 h	Non-polarized_x000D_ 1 h	Non-polarized_x000D_ 2.5 h	Non-polarized_x000D_ 6.5 h	Polarized_x000D_ 0 h	Polarized_x000D_ 1 h	Polarized_x000D_ 2.5 h	Polarized_x000D_ 6.5 h	logFC.x	p-value_x000D_ comparison	p-value_x000D_ Polarized	p-value_x000D_ Non-polarized
1433B_HUMAN	P31946	17	14-3-3 protein beta/alpha (Protein 1054) (Protein kinase C inhibitor protein 1) (KCIP-1) [Cleaved into: 14-3-3 protein beta/alpha, N-terminally processed]	YWHAB	cytoplasmic sequestering of protein [GO:0051220]; hippo signaling [GO:0035329]; MAPK cascade [GO:0000165]; membrane organization [GO:0061024]; negative regulation of G-protein coupled receptor protein signaling pathway [GO:0045744]; negative regulation of protein dephosphorylation [GO:0035308]; negative regulation of transcription, DNA-templated [GO:0045892]; positive regulation of catalytic acti…	K16197;	-0.0540499	-0.0363943	-0.0665877	-0.0898032	0.0914741	-0.0446855	0.020704	0.00541021	0.139966	0.024555	0.936547	0.979449
1433E_HUMAN	P62258	20	14-3-3 protein epsilon (14-3-3E)	YWHAE	cellular response to heat [GO:0034605]; cerebral cortex development [GO:0021987]; ciliary basal body-plasma membrane docking [GO:0097711]; G2/M transition of mitotic cell cycle [GO:0000086]; hippocampus development [GO:0021766]; hippo signaling [GO:0035329]; intracellular signal transduction [GO:0035556]; MAPK cascade [GO:0000165]; membrane organization [GO:0061024]; membrane repolarization durin…	K06630;	-0.0275928	-0.089297	-0.126804	-0.11613	0.101918	0.0462593	0.0058098	0.113731	0.127741	0.0400526	0.915633	0.300406
1433F_HUMAN	Q04917	10	14-3-3 protein eta (Protein AS1)	YWHAH YWHA1	glucocorticoid catabolic process [GO:0006713]; glucocorticoid receptor signaling pathway [GO:0042921]; intracellular protein transport [GO:0006886]; membrane depolarization during action potential [GO:0086010]; membrane organization [GO:0061024]; negative regulation of dendrite morphogenesis [GO:0050774]; positive regulation of protein insertion into mitochondrial membrane involved in apoptotic s…	K16198;	0.0966512	0.049898	0.0106723	-0.00402465	-0.016547	-0.0340397	-0.0653398	-0.0291902	-0.0820069	0.249028	0.993272	0.763724
1433G_HUMAN	P61981	4	14-3-3 protein gamma (Protein kinase C inhibitor protein 1) (KCIP-1) [Cleaved into: 14-3-3 protein gamma, N-terminally processed]	YWHAG	cellular response to insulin stimulus [GO:0032869]; ciliary basal body-plasma membrane docking [GO:0097711]; G2/M transition of mitotic cell cycle [GO:0000086]; membrane organization [GO:0061024]; negative regulation of protein kinase activity [GO:0006469]; positive regulation of protein insertion into mitochondrial membrane involved in apoptotic signaling pathway [GO:1900740]; protein targeting …	K16198;	-0.202764	-0.0834325	-0.237358	-0.150132	0.198103	0.117238	0.148334	0.0898928	0.355133	0.000145778	0.957195	0.542223
1433S_HUMAN	P31947	12	14-3-3 protein sigma (Epithelial cell marker protein 1) (Stratifin)	SFN HME1	DNA damage response, signal transduction by p53 class mediator resulting in cell cycle arrest [GO:0006977]; establishment of skin barrier [GO:0061436]; intrinsic apoptotic signaling pathway in response to DNA damage [GO:0008630]; keratinization [GO:0031424]; keratinocyte development [GO:0003334]; membrane organization [GO:0061024]; negative regulation of cysteine-type endopeptidase activity invol…	K06644;	-0.321246	-0.28995	-0.388313	-0.36794	0.166539	0.172055	0.19515	0.350401	0.490682	4.15893e-06	0.879438	0.787613
1433T_HUMAN	P27348	9	14-3-3 protein theta (14-3-3 protein T-cell) (14-3-3 protein tau) (Protein HS1)	YWHAQ	membrane organization [GO:0061024]; negative regulation of ion transmembrane transport [GO:0034766]; negative regulation of transcription, DNA-templated [GO:0045892]; positive regulation of protein insertion into mitochondrial membrane involved in apoptotic signaling pathway [GO:1900740]; substantia nigra development [GO:0021762]	K16197;	-0.0463208	-0.115351	-0.115073	-0.0346646	0.0547848	0.0242795	0.0481352	0.0608997	0.109971	0.0752711	0.997631	0.800314
1433Z_HUMAN	P63104	12	14-3-3 protein zeta/delta (Protein kinase C inhibitor protein 1) (KCIP-1)	YWHAZ	cytokine-mediated signaling pathway [GO:0019221]; establishment of Golgi localization [GO:0051683]; Golgi reassembly [GO:0090168]; membrane organization [GO:0061024]; negative regulation of apoptotic process [GO:0043066]; platelet activation [GO:0030168]; positive regulation of protein insertion into mitochondrial membrane involved in apoptotic signaling pathway [GO:1900740]; protein targeting [G…	K16197;	-0.00947996	-0.00351024	-0.0244313	-0.00722579	-0.0119666	0.00793276	-0.00504159	0.0278258	-0.0136307	0.831838	0.988285	0.988605
1A24_HUMAN	P05534	2	HLA class I histocompatibility antigen, A-24 alpha chain (Aw-24) (HLA class I histocompatibility antigen, A-9 alpha chain) (MHC class I antigen A*24)	HLA-A HLAA	antigen processing and presentation of exogenous peptide antigen via MHC class I, TAP-dependent [GO:0002479]; antigen processing and presentation of exogenous peptide antigen via MHC class I, TAP-independent [GO:0002480]; antigen processing and presentation of peptide antigen via MHC class I [GO:0002474]; interferon-gamma-mediated signaling pathway [GO:0060333]; protection from natural killer cel…		-0.331159	-0.32461	-0.191488	-0.270635	0.245004	0.206096	0.216071	0.218176	0.662202	2.02204e-06	0.990919	0.262434
1C12_HUMAN	P30508	11	HLA class I histocompatibility antigen, Cw-12 alpha chain (MHC class I antigen Cw*12)	HLA-C HLAC	antigen processing and presentation of exogenous peptide antigen via MHC class I, TAP-dependent [GO:0002479]; antigen processing and presentation of exogenous peptide antigen via MHC class I, TAP-independent [GO:0002480]; antigen processing and presentation of peptide antigen via MHC class I [GO:0002474]; immune response [GO:0006955]; interferon-gamma-mediated signaling pathway [GO:0060333]; regu…		-0.391419	-0.348366	-0.35943	-0.274508	0.17099	0.298951	0.308173	0.255569	0.621967	1.48557e-05	0.988285	0.888167
2A5A_HUMAN	Q15172	2	Serine/threonine-protein phosphatase 2A 56 kDa regulatory subunit alpha isoform (PP2A B subunit isoform B'-alpha) (PP2A B subunit isoform B56-alpha) (PP2A B subunit isoform PR61-alpha) (PR61alpha) (PP2A B subunit isoform R5-alpha)	PPP2R5A	negative regulation of lipid kinase activity [GO:0090219]; negative regulation of protein localization to plasma membrane [GO:1903077]; positive regulation of protein dephosphorylation [GO:0035307]; protein dephosphorylation [GO:0006470]; signal transduction [GO:0007165]	K11584;	0.180612	0.283805	0.0578373	-0.686053	0.0419612	-0.0868242	-0.0136081	0.0206225	-0.416917	0.0359347	0.988285	0.0575254
2A5D_HUMAN	Q14738	7	Serine/threonine-protein phosphatase 2A 56 kDa regulatory subunit delta isoform (PP2A B subunit isoform B'-delta) (PP2A B subunit isoform B56-delta) (PP2A B subunit isoform PR61-delta) (PP2A B subunit isoform R5-delta)	PPP2R5D	negative regulation of peptidyl-threonine phosphorylation [GO:0010801]; nervous system development [GO:0007399]; positive regulation of protein dephosphorylation [GO:0035307]; protein dephosphorylation [GO:0006470]; signal transduction [GO:0007165]	K11584;	0.0597056	0.0677194	0.0550428	-0.0173947	0.0191294	-0.0893652	-0.00433266	-0.0970391	-0.0482021	0.313902	0.85626	0.434115
2A5E_HUMAN	Q16537	3	Serine/threonine-protein phosphatase 2A 56 kDa regulatory subunit epsilon isoform (PP2A B subunit isoform B'-epsilon) (PP2A B subunit isoform B56-epsilon) (PP2A B subunit isoform PR61-epsilon) (PP2A B subunit isoform R5-epsilon)	PPP2R5E	signal transduction [GO:0007165]	K11584;	0.00943175	0.0826992	0.138346	0.0435758	-0.149404	-0.0351739	-0.127891	0.0233832	-0.317213	0.125085	0.970538	0.831961
2A5G_HUMAN	Q13362	5	Serine/threonine-protein phosphatase 2A 56 kDa regulatory subunit gamma isoform (PP2A B subunit isoform B'-gamma) (PP2A B subunit isoform B56-gamma) (PP2A B subunit isoform PR61-gamma) (PP2A B subunit isoform R5-gamma) (Renal carcinoma antigen NY-REN-29)	PPP2R5C KIAA0044	DNA damage response, signal transduction by p53 class mediator resulting in cell cycle arrest [GO:0006977]; intrinsic apoptotic signaling pathway in response to DNA damage by p53 class mediator [GO:0042771]; negative regulation of cell proliferation [GO:0008285]; proteasome-mediated ubiquitin-dependent protein catabolic process [GO:0043161]; regulation of phosphatidylinositol 3-kinase signaling […	K11584;	0.0274413	0.135772	-0.00712715	-0.0232444	0.0736054	-0.0312578	-0.0388068	-0.0846338	-0.0347131	0.769881	0.996194	0.426731
2AAA_HUMAN	P30153	22	Serine/threonine-protein phosphatase 2A 65 kDa regulatory subunit A alpha isoform (Medium tumor antigen-associated 61 kDa protein) (PP2A subunit A isoform PR65-alpha) (PP2A subunit A isoform R1-alpha)	PPP2R1A	apoptotic process [GO:0006915]; ceramide metabolic process [GO:0006672]; chromosome segregation [GO:0007059]; ciliary basal body-plasma membrane docking [GO:0097711]; female meiotic nuclear division [GO:0007143]; G2/M transition of mitotic cell cycle [GO:0000086]; inactivation of MAPK activity [GO:0000188]; meiotic sister chromatid cohesion, centromeric [GO:0051754]; meiotic spindle elongation [G…	K03456;	0.16062	0.206248	0.153718	0.124489	-0.17612	-0.200973	-0.185623	-0.175752	-0.370993	6.86051e-07	0.988285	0.818693
2AAB_HUMAN	P30154	5	Serine/threonine-protein phosphatase 2A 65 kDa regulatory subunit A beta isoform (PP2A subunit A isoform PR65-beta) (PP2A subunit A isoform R1-beta)	PPP2R1B	apoptotic process involved in morphogenesis [GO:0060561]; positive regulation of extrinsic apoptotic signaling pathway in absence of ligand [GO:2001241]	K03456;	0.283855	0.387559	0.324538	0.344105	-0.512915	-0.485418	-0.380915	-0.314468	-0.710503	0.00245171	0.92875	0.870588
2ABA_HUMAN	P63151	8	Serine/threonine-protein phosphatase 2A 55 kDa regulatory subunit B alpha isoform (PP2A subunit B isoform B55-alpha) (PP2A subunit B isoform PR55-alpha) (PP2A subunit B isoform R2-alpha) (PP2A subunit B isoform alpha)	PPP2R2A	developmental process [GO:0032502]; G2/M transition of mitotic cell cycle [GO:0000086]; mitotic cell cycle [GO:0000278]; nuclear-transcribed mRNA catabolic process, nonsense-mediated decay [GO:0000184]; peptidyl-serine dephosphorylation [GO:0070262]; protein dephosphorylation [GO:0006470]; response to morphine [GO:0043278]	K04354;	0.189842	0.202185	0.0913688	0.120047	-0.111145	-0.163373	-0.212667	-0.226137	-0.342991	1.12269e-05	0.988285	0.543642
3BHS1_HUMAN	P14060	7	3 beta-hydroxysteroid dehydrogenase/Delta 5-->4-isomerase type 1 (3 beta-hydroxysteroid dehydrogenase/Delta 5-->4-isomerase type I) (3-beta-HSD I) (Trophoblast antigen FDO161G) [Includes: 3-beta-hydroxy-Delta(5)-steroid dehydrogenase (EC 1.1.1.145) (3-beta-hydroxy-5-ene steroid dehydrogenase) (Progesterone reductase); Steroid Delta-isomerase (EC 5.3.3.1) (Delta-5-3-ketosteroid isomerase)]	HSD3B1 3BH HSDB3A	androgen biosynthetic process [GO:0006702]; estrogen biosynthetic process [GO:0006703]; glucocorticoid biosynthetic process [GO:0006704]; mineralocorticoid biosynthetic process [GO:0006705]; steroid biosynthetic process [GO:0006694]	K00070;	0.0592549	0.0921213	0.0890744	0.0990456	-0.157013	-0.211625	-0.0723211	-0.0847647	-0.264215	0.064766	0.957264	0.943357
3BP1_HUMAN	Q9Y3L3	5	SH3 domain-binding protein 1	SH3BP1	actin filament organization [GO:0007015]; cell junction assembly [GO:0034329]; cell migration [GO:0016477]; establishment of epithelial cell apical/basal polarity [GO:0045198]; negative regulation of small GTPase mediated signal transduction [GO:0051058]; phagocytosis, engulfment [GO:0006911]; positive regulation of GTPase activity [GO:0043547]; regulation of actin cytoskeleton organization [GO:0…	K20652;	-0.350825	-0.284861	-0.455717	-0.382105	0.272667	0.320114	0.220565	0.30489	0.685213	8.53476e-06	0.988285	0.658938
3HIDH_HUMAN	P31937	8	3-hydroxyisobutyrate dehydrogenase, mitochondrial (HIBADH) (EC 1.1.1.31)	HIBADH	branched-chain amino acid catabolic process [GO:0009083]; valine catabolic process [GO:0006574]	K00020;	-0.271837	-0.340512	-0.323316	-0.353964	0.222324	0.265024	0.263433	0.188483	0.556235	5.55299e-08	0.908738	0.964612
41_HUMAN	P11171	2	Protein 4.1 (P4.1) (4.1R) (Band 4.1) (EPB4.1)	EPB41 E41P	actin cytoskeleton organization [GO:0030036]; actomyosin structure organization [GO:0031032]; cell cycle [GO:0007049]; cell division [GO:0051301]; cortical actin cytoskeleton organization [GO:0030866]; positive regulation of protein binding [GO:0032092]; positive regulation of protein localization to cell cortex [GO:1904778]; protein-containing complex assembly [GO:0065003]; regulation of cell sh…	K06107;	0.0833196	-0.447343	0.146122	-0.136403	-0.00881913	-0.068433	0.29836	-0.00634689	-0.0895168	0.623592	0.808593	0.323675
4F2_HUMAN	P08195	23	4F2 cell-surface antigen heavy chain (4F2hc) (4F2 heavy chain antigen) (Lymphocyte activation antigen 4F2 large subunit) (Solute carrier family 3 member 2) (CD antigen CD98)	SLC3A2 MDU1	amino acid transport [GO:0006865]; calcium ion transport [GO:0006816]; carbohydrate metabolic process [GO:0005975]; leukocyte migration [GO:0050900]; L-leucine import across plasma membrane [GO:1903801]; response to exogenous dsRNA [GO:0043330]; tryptophan transport [GO:0015827]	K06519;	0.341908	0.248118	0.254803	0.256948	-0.362748	-0.359164	-0.390038	-0.347622	-0.690636	6.489e-07	0.99334	0.634936
5NTC_HUMAN	P49902	2	Cytosolic purine 5'-nucleotidase (EC 3.1.3.5) (Cytosolic 5'-nucleotidase II)	NT5C2 NT5B NT5CP PNT5	adenosine metabolic process [GO:0046085]; drug metabolic process [GO:0017144]; IMP metabolic process [GO:0046040]; purine nucleotide catabolic process [GO:0006195]	K01081;	-0.0954646	-0.0636871	0.00861343	0.0952269	-0.0810814	-0.0169372	0.112195	0.0346068	0.00200165	0.987696	0.946464	0.580894
5NTD_HUMAN	P21589	15	5'-nucleotidase (5'-NT) (EC 3.1.3.5) (Ecto-5'-nucleotidase) (CD antigen CD73)	NT5E NT5 NTE	adenosine biosynthetic process [GO:0046086]; AMP catabolic process [GO:0006196]; DNA metabolic process [GO:0006259]; leukocyte cell-cell adhesion [GO:0007159]; NAD metabolic process [GO:0019674]; negative regulation of inflammatory response [GO:0050728]; purine nucleotide catabolic process [GO:0006195]; pyrimidine nucleoside catabolic process [GO:0046135]	K19970;	0.0257077	-0.0369036	-0.0232651	0.0258114	-0.0532919	-0.0462737	-0.0525475	0.0298928	-0.00789317	0.937361	0.981332	0.690989
6PGD_HUMAN	P52209	19	6-phosphogluconate dehydrogenase, decarboxylating (EC 1.1.1.44)	PGD PGDH	D-gluconate metabolic process [GO:0019521]; oxidation-reduction process [GO:0055114]; pentose biosynthetic process [GO:0019322]; pentose-phosphate shunt [GO:0006098]; pentose-phosphate shunt, oxidative branch [GO:0009051]	K00033;	0.0547629	0.0240174	0.0105379	0.0701632	-0.0385029	-0.0566287	-0.0853551	-0.0750251	-0.101255	0.114302	0.990919	0.761983
6PGL_HUMAN	O95336	9	6-phosphogluconolactonase (6PGL) (EC 3.1.1.31)	PGLS	carbohydrate metabolic process [GO:0005975]; pentose-phosphate shunt [GO:0006098]; pentose-phosphate shunt, oxidative branch [GO:0009051]	K01057;	-0.145642	-0.118806	-0.140183	-0.106414	0.0722084	0.128	0.14325	0.0648926	0.265684	0.000148844	0.988285	0.718273
8ODP_HUMAN	P36639	5	7,8-dihydro-8-oxoguanine triphosphatase (EC 3.6.1.55) (2-hydroxy-dATP diphosphatase) (EC 3.6.1.56) (8-oxo-dGTPase) (Nucleoside diphosphate-linked moiety X motif 1) (Nudix motif 1)	NUDT1 MTH1	aging [GO:0007568]; dATP catabolic process [GO:0046061]; dGTP catabolic process [GO:0006203]; DNA protection [GO:0042262]; DNA repair [GO:0006281]; male gonad development [GO:0008584]; nucleobase-containing small molecule catabolic process [GO:0034656]; purine nucleotide catabolic process [GO:0006195]; response to cadmium ion [GO:0046686]; response to oxidative stress [GO:0006979]	K17816;	-0.00294584	0.0576866	-0.000706095	0.0904565	0.0236246	-0.0357427	-0.0136498	-0.0612142	0.0238134	0.81571	0.988285	0.864836
A16A1_HUMAN	Q8IZ83	8	Aldehyde dehydrogenase family 16 member A1	ALDH16A1			-0.239934	-0.178204	-0.265825	-0.200252	0.0405255	0.235439	0.136581	0.15146	0.32301	0.0053321	0.994175	0.804568
A4_HUMAN	P05067	3	Amyloid-beta A4 protein (ABPP) (APPI) (APP) (Alzheimer disease amyloid protein) (Amyloid precursor protein) (Amyloid-beta precursor protein) (Cerebral vascular amyloid peptide) (CVAP) (PreA4) (Protease nexin-II) (PN-II) [Cleaved into: N-APP; Soluble APP-alpha (S-APP-alpha); Soluble APP-beta (S-APP-beta); C99 (Beta-secretase C-terminal fragment) (Beta-CTF); Amyloid-beta protein 42 (Abeta42) (Beta-…	APP A4 AD1	activation of MAPK activity [GO:0000187]; activation of MAPKKK activity [GO:0000185]; adenylate cyclase-activating G-protein coupled receptor signaling pathway [GO:0007189]; adenylate cyclase-inhibiting G-protein coupled receptor signaling pathway [GO:0007193]; adult locomotory behavior [GO:0008344]; amyloid fibril formation [GO:1990000]; antibacterial humoral response [GO:0019731]; antifungal hu…	K04520;	-0.0660584	-0.137509	-0.24713	-0.266648	0.170192	0.179452	0.0699878	0.229656	0.297309	0.0165248	0.808593	0.651292
AAAS_HUMAN	Q9NRG9	8	Aladin (Adracalin)	AAAS ADRACALA GL003	fertilization [GO:0009566]; learning [GO:0007612]; mRNA export from nucleus [GO:0006406]; nucleocytoplasmic transport [GO:0006913]; regulation of nucleocytoplasmic transport [GO:0046822]; viral process [GO:0016032]	K14320;	-0.123045	-0.0507817	-0.118019	-0.147892	0.0474573	0.0739067	0.0652028	0.0586968	0.17646	0.000949719	0.989587	0.488628
AAAT_HUMAN	Q15758	7	Neutral amino acid transporter B(0) (ATB(0)) (Baboon M7 virus receptor) (RD114/simian type D retrovirus receptor) (Sodium-dependent neutral amino acid transporter type 2) (Solute carrier family 1 member 5)	SLC1A5 ASCT2 M7V1 RDR RDRC	amino acid transport [GO:0006865]; glutamine secretion [GO:0010585]; glutamine transport [GO:0006868]; L-glutamine import across plasma membrane [GO:1903803]; neutral amino acid transport [GO:0015804]; protein homotrimerization [GO:0070207]	K05616;	0.251665	0.210017	0.223296	0.194495	-0.31192	-0.342947	-0.234284	-0.229036	-0.553406	2.48027e-05	0.970538	0.637444
AAK1_HUMAN	Q2M2I8	6	AP2-associated protein kinase 1 (EC 2.7.11.1) (Adaptor-associated kinase 1)	AAK1 KIAA1048	endocytosis [GO:0006897]; membrane organization [GO:0061024]; positive regulation of Notch signaling pathway [GO:0045747]; protein autophosphorylation [GO:0046777]; protein phosphorylation [GO:0006468]; protein stabilization [GO:0050821]; regulation of clathrin-dependent endocytosis [GO:2000369]; regulation of protein localization [GO:0032880]	K08853;	-0.0463993	-0.180626	-0.0501532	-0.17409	0.122821	0.221434	0.129742	0.0637205	0.198685	0.108002	0.882049	0.787613
AAKG1_HUMAN	P54619	4	5'-AMP-activated protein kinase subunit gamma-1 (AMPK gamma1) (AMPK subunit gamma-1) (AMPKg)	PRKAG1	cell cycle arrest [GO:0007050]; fatty acid biosynthetic process [GO:0006633]; import into nucleus [GO:0051170]; macroautophagy [GO:0016236]; positive regulation of gene expression [GO:0010628]; positive regulation of protein kinase activity [GO:0045860]; protein phosphorylation [GO:0006468]; regulation of glycolytic process [GO:0006110]; regulation of protein serine/threonine kinase activity [GO:…	K07200;	-0.150361	-0.198307	-0.29219	0.0354354	0.121351	0.191409	0.249342	0.104292	0.294226	0.0198703	0.978908	0.0698933
AAMP_HUMAN	Q13685	2	Angio-associated migratory cell protein	AAMP	angiogenesis [GO:0001525]; cell differentiation [GO:0030154]; positive regulation of endothelial cell migration [GO:0010595]; ribosomal large subunit biogenesis [GO:0042273]; smooth muscle cell migration [GO:0014909]		0.171378	0.254032	0.168547	0.221101	-0.293997	-0.295045	-0.146312	-0.259276	-0.482422	6.21299e-07	0.808593	0.718273
AAPK1_HUMAN	Q13131	4	5'-AMP-activated protein kinase catalytic subunit alpha-1 (AMPK subunit alpha-1) (EC 2.7.11.1) (Acetyl-CoA carboxylase kinase) (ACACA kinase) (EC 2.7.11.27) (Hydroxymethylglutaryl-CoA reductase kinase) (HMGCR kinase) (EC 2.7.11.31) (Tau-protein kinase PRKAA1) (EC 2.7.11.26)	PRKAA1 AMPK1	activation of MAPK activity [GO:0000187]; CAMKK-AMPK signaling cascade [GO:0061762]; cell cycle arrest [GO:0007050]; cellular response to calcium ion [GO:0071277]; cellular response to ethanol [GO:0071361]; cellular response to glucose starvation [GO:0042149]; cellular response to glucose stimulus [GO:0071333]; cellular response to hydrogen peroxide [GO:0070301]; cellular response to hypoxia [GO:…	K07198;	-0.0910353	-0.166352	-0.0325865	-0.00900488	0.0204218	0.0518987	0.076452	0.10972	0.112285	0.15433	0.936547	0.568616
AAR2_HUMAN	Q9Y312	6	Protein AAR2 homolog (AAR2 splicing factor homolog)	AAR2 C20orf4 CGI-23 PRO0225	spliceosomal tri-snRNP complex assembly [GO:0000244]	K13205;	-0.0329231	0.0633561	0.0279966	0.121502	-0.0731246	-0.188124	0.0118216	-0.056482	-0.0680562	0.439492	0.85626	0.797256
AASD1_HUMAN	Q9BTE6	3	Alanyl-tRNA editing protein Aarsd1 (Alanyl-tRNA synthetase domain-containing protein 1)	AARSD1	alanyl-tRNA aminoacylation [GO:0006419]	K07050;	0.07608	0.157763	0.162828	0.212872	-0.274494	-0.269982	-0.291157	-0.243615	-0.351236	0.0374985	0.997926	0.885716
AATC_HUMAN	P17174	16	Aspartate aminotransferase, cytoplasmic (cAspAT) (EC 2.6.1.1) (EC 2.6.1.3) (Cysteine aminotransferase, cytoplasmic) (Cysteine transaminase, cytoplasmic) (cCAT) (Glutamate oxaloacetate transaminase 1) (Transaminase A)	GOT1	2-oxoglutarate metabolic process [GO:0006103]; aspartate biosynthetic process [GO:0006532]; aspartate catabolic process [GO:0006533]; aspartate metabolic process [GO:0006531]; cellular amino acid biosynthetic process [GO:0008652]; cellular response to insulin stimulus [GO:0032869]; cellular response to mechanical stimulus [GO:0071260]; fatty acid homeostasis [GO:0055089]; gluconeogenesis [GO:0006…	K14454;	0.223049	0.262931	0.221654	0.23786	-0.248514	-0.279301	-0.239915	-0.271154	-0.474776	3.4634e-07	0.994175	0.980017
AATF_HUMAN	Q9NY61	3	Protein AATF (Apoptosis-antagonizing transcription factor) (Rb-binding protein Che-1)	AATF CHE1 DED HSPC277	cell adhesion [GO:0007155]; cellular response to DNA damage stimulus [GO:0006974]; embryonic cleavage [GO:0040016]; negative regulation of amyloid precursor protein biosynthetic process [GO:0042985]; negative regulation of apoptotic process [GO:0043066]; negative regulation of reactive oxygen species metabolic process [GO:2000378]; negative regulation of superoxide anion generation [GO:0032929]; …	K14782;	0.206592	0.314135	0.163	0.0901365	-0.225143	-0.161176	-0.161342	-0.259636	-0.38195	0.000308513	0.936547	0.686275
AATM_HUMAN	P00505	18	Aspartate aminotransferase, mitochondrial (mAspAT) (EC 2.6.1.1) (EC 2.6.1.7) (Fatty acid-binding protein) (FABP-1) (Glutamate oxaloacetate transaminase 2) (Kynurenine aminotransferase 4) (Kynurenine aminotransferase IV) (Kynurenine--oxoglutarate transaminase 4) (Kynurenine--oxoglutarate transaminase IV) (Plasma membrane-associated fatty acid-binding protein) (FABPpm) (Transaminase A)	GOT2	2-oxoglutarate metabolic process [GO:0006103]; 4-hydroxyproline catabolic process [GO:0019470]; aspartate biosynthetic process [GO:0006532]; aspartate catabolic process [GO:0006533]; aspartate metabolic process [GO:0006531]; cellular amino acid biosynthetic process [GO:0008652]; fatty acid transport [GO:0015908]; female pregnancy [GO:0007565]; gluconeogenesis [GO:0006094]; glutamate catabolic pro…	K14455;	0.224007	0.159879	0.135312	0.156413	-0.170315	-0.186576	-0.240989	-0.133982	-0.360525	7.4397e-08	0.936547	0.520617
ABC3F_HUMAN	Q8IUX4	3	DNA dC->dU-editing enzyme APOBEC-3F (EC 3.5.4.-) (Apolipoprotein B mRNA-editing enzyme catalytic polypeptide-like 3F) (A3F)	APOBEC3F	base conversion or substitution editing [GO:0016553]; defense response to virus [GO:0051607]; DNA cytosine deamination [GO:0070383]; DNA demethylation [GO:0080111]; innate immune response [GO:0045087]; negative regulation of single stranded viral RNA replication via double stranded DNA intermediate [GO:0045869]; negative regulation of transposition [GO:0010529]; negative regulation of viral genom…	K18750;	-0.20969	-0.183038	-0.220277	-0.0957461	-0.00590676	0.270772	0.169475	0.0588102	0.210757	0.0810058	0.915082	0.529417
ABCD3_HUMAN	P28288	8	ATP-binding cassette sub-family D member 3 (70 kDa peroxisomal membrane protein) (PMP70)	ABCD3 PMP70 PXMP1	fatty acid beta-oxidation [GO:0006635]; fatty acid biosynthetic process [GO:0006633]; peroxisomal long-chain fatty acid import [GO:0015910]; peroxisome organization [GO:0007031]; response to drug [GO:0042493]; response to organic cyclic compound [GO:0014070]; transmembrane transport [GO:0055085]; very long-chain fatty acid catabolic process [GO:0042760]	K05677;	-0.0947336	-0.000532635	-0.0110022	-0.140121	0.0706964	0.0623358	0.0617881	0.044824	0.117418	0.125919	0.997926	0.675697
ABCE1_HUMAN	P61221	12	ATP-binding cassette sub-family E member 1 (2'-5'-oligoadenylate-binding protein) (HuHP68) (RNase L inhibitor) (Ribonuclease 4 inhibitor) (RNS4I)	ABCE1 RLI RNASEL1 RNASELI RNS4I OK/SW-cl.40	negative regulation of endoribonuclease activity [GO:0060702]; regulation of type I interferon-mediated signaling pathway [GO:0060338]; ribosomal subunit export from nucleus [GO:0000054]; translational initiation [GO:0006413]; translational termination [GO:0006415]; viral process [GO:0016032]	K06174;	0.215781	0.20299	0.248571	0.25987	-0.295647	-0.34582	-0.297735	-0.224449	-0.523026	1.81817e-08	0.85626	0.65634
ABCF1_HUMAN	Q8NE71	18	ATP-binding cassette sub-family F member 1 (ATP-binding cassette 50) (TNF-alpha-stimulated ABC protein)	ABCF1 ABC50	inflammatory response [GO:0006954]; positive regulation of translation [GO:0045727]; translation [GO:0006412]; translational initiation [GO:0006413]; transmembrane transport [GO:0055085]	K06184;	0.134404	0.143019	0.0850926	0.111378	-0.145524	-0.179393	-0.213913	-0.231581	-0.282	1.46755e-05	0.990919	0.820724
ABCF2_HUMAN	Q9UG63	11	ATP-binding cassette sub-family F member 2 (Iron-inhibited ABC transporter 2)	ABCF2 HUSSY-18		K06185;	0.223451	0.286521	0.28197	0.315044	-0.344145	-0.422519	-0.378043	-0.263918	-0.581986	1.23839e-06	0.988285	0.793005
ABCF3_HUMAN	Q9NUQ8	9	ATP-binding cassette sub-family F member 3	ABCF3	defense response to virus [GO:0051607]	K06158;	0.145994	0.168938	0.169706	0.173296	-0.119209	-0.173875	-0.128626	-0.222005	-0.229458	0.000839292	0.934909	0.80696
ABCG2_HUMAN	Q9UNQ0	3	ATP-binding cassette sub-family G member 2 (Breast cancer resistance protein) (CDw338) (Mitoxantrone resistance-associated protein) (Placenta-specific ATP-binding cassette transporter) (Urate exporter) (CD antigen CD338)	ABCG2 ABCP BCRP BCRP1 MXR	cellular iron ion homeostasis [GO:0006879]; cholesterol efflux [GO:0033344]; response to drug [GO:0042493]; urate metabolic process [GO:0046415]	K05681;	0.488132	0.51971	0.565505	0.375601	-0.663865	-1.09012	-0.915762	-0.946602	-1.0851	0.00137886	0.954578	0.818693
ABD12_HUMAN	Q8N2K0	5	Monoacylglycerol lipase ABHD12 (EC 3.1.1.23) (2-arachidonoylglycerol hydrolase) (Abhydrolase domain-containing protein 12)	ABHD12 C20orf22	acylglycerol catabolic process [GO:0046464]; adult walking behavior [GO:0007628]; glycerophospholipid catabolic process [GO:0046475]; monoacylglycerol catabolic process [GO:0052651]; phosphatidylserine catabolic process [GO:0006660]; protein depalmitoylation [GO:0002084]; response to auditory stimulus [GO:0010996]	K13704;	-0.445317	-0.545256	-0.599	-0.463403	0.3164	0.378239	0.429014	0.342521	0.777058	1.56989e-05	0.988285	0.84444
ABHDA_HUMAN	Q9NUJ1	2	Mycophenolic acid acyl-glucuronide esterase, mitochondrial (EC 3.1.1.93) (Alpha/beta hydrolase domain-containing protein 10) (Abhydrolase domain-containing protein 10)	ABHD10	cellular glucuronidation [GO:0052695]; glucuronoside catabolic process [GO:0019391]	K13702;	0.0762761	-0.0713429	0.0352131	-0.18068	0.18695	-0.017366	0.00833287	0.00602391	0.0461754	0.81571	0.988285	0.705966
ABHDB_HUMAN	Q8NFV4	7	Protein ABHD11 (EC 3.-.-.-) (Alpha/beta hydrolase domain-containing protein 11) (Abhydrolase domain-containing protein 11) (Williams-Beuren syndrome chromosomal region 21 protein)	ABHD11 WBSCR21 PP1226		K13703;	-0.104562	-0.188288	-0.255802	-0.327382	0.135102	0.186411	0.154936	0.134915	0.218988	0.00817763	0.988285	0.309178
ABHEB_HUMAN	Q96IU4	5	Protein ABHD14B (EC 3.-.-.-) (Alpha/beta hydrolase domain-containing protein 14B) (Abhydrolase domain-containing protein 14B) (CCG1-interacting factor B)	ABHD14B CIB	3'-phosphoadenosine 5'-phosphosulfate metabolic process [GO:0050427]; positive regulation of transcription by RNA polymerase II [GO:0045944]	K13706;	-0.461054	-0.445999	-0.449538	-0.400895	0.401079	0.277046	0.420211	0.233038	0.833373	1.94304e-07	0.94917	0.969029
ABHGA_HUMAN	O95870	2	Protein ABHD16A (EC 3.-.-.-) (Alpha/beta hydrolase domain-containing protein 16A) (Abhydrolase domain-containing protein 16A) (HLA-B-associated transcript 5) (Protein G5)	ABHD16A BAT5 G5 NG26 PP199	monoacylglycerol catabolic process [GO:0052651]; prostaglandin catabolic process [GO:1905344]		0.295015	0.283725	-0.5397	-0.637764	0.16597	-0.0344716	-0.393357	0.166099	-0.0480199	0.947378	0.936547	0.162697
ABI1_HUMAN	Q8IZP0	3	Abl interactor 1 (Abelson interactor 1) (Abi-1) (Abl-binding protein 4) (AblBP4) (Eps8 SH3 domain-binding protein) (Eps8-binding protein) (Nap1-binding protein) (Nap1BP) (Spectrin SH3 domain-binding protein 1) (e3B1)	ABI1 SSH3BP1	actin polymerization or depolymerization [GO:0008154]; dendrite morphogenesis [GO:0048813]; Fc-gamma receptor signaling pathway involved in phagocytosis [GO:0038096]; lamellipodium morphogenesis [GO:0072673]; megakaryocyte development [GO:0035855]; negative regulation of cell proliferation [GO:0008285]; peptidyl-tyrosine phosphorylation [GO:0018108]; somitogenesis [GO:0001756]; transmembrane rece…		0.00778335	0.0872218	-0.00113116	-0.026255	0.0457821	0.0231552	0.110431	-0.0451038	0.0455111	0.636963	0.85626	0.540553
ABR_HUMAN	Q12979	3	Active breakpoint cluster region-related protein	ABR	actin cytoskeleton organization [GO:0030036]; brain development [GO:0007420]; G-protein coupled receptor signaling pathway [GO:0007186]; inner ear morphogenesis [GO:0042472]; negative regulation of blood vessel remodeling [GO:0060313]; negative regulation of cellular extravasation [GO:0002692]; negative regulation of inflammatory response [GO:0050728]; negative regulation of neutrophil degranulat…	K20629;	-0.112901	-0.417599	-0.155528	-0.19861	0.165862	0.169706	0.10951	0.28191	0.212007	0.359572	0.981332	0.58566
ABRX2_HUMAN	Q15018	5	BRISC complex subunit Abraxas 2 (Abraxas brother protein 1) (Protein FAM175B)	ABRAXAS2 ABRO1 FAM175B KIAA0157	attachment of spindle microtubules to kinetochore [GO:0008608]; cell division [GO:0051301]; chromosome segregation [GO:0007059]; mitotic cell cycle [GO:0000278]; mitotic spindle assembly [GO:0090307]; protein deubiquitination [GO:0016579]; protein K63-linked deubiquitination [GO:0070536]; response to ischemia [GO:0002931]	K20799;	-0.0237445	-0.0187447	-0.105043	-0.0356117	0.0128332	0.117251	0.0890382	-0.0287238	0.0190709	0.816057	0.85626	0.849247
ACACA_HUMAN	Q13085	31	Acetyl-CoA carboxylase 1 (ACC1) (EC 6.4.1.2) (ACC-alpha) [Includes: Biotin carboxylase (EC 6.3.4.14)]	ACACA ACAC ACC1 ACCA	acetyl-CoA metabolic process [GO:0006084]; carnitine shuttle [GO:0006853]; cellular response to prostaglandin E stimulus [GO:0071380]; fatty acid biosynthetic process [GO:0006633]; fatty-acyl-CoA biosynthetic process [GO:0046949]; lipid homeostasis [GO:0055088]; malonyl-CoA biosynthetic process [GO:2001295]; positive regulation of cellular metabolic process [GO:0031325]; protein homotetramerizati…	K11262;	0.291631	0.336922	0.247574	0.200183	-0.369716	-0.290145	-0.328568	-0.354131	-0.658132	4.67803e-09	0.957195	0.497487
ACAD9_HUMAN	Q9H845	12	Acyl-CoA dehydrogenase family member 9, mitochondrial (ACAD-9) (EC 1.3.99.-)	ACAD9	long-chain fatty acid metabolic process [GO:0001676]; medium-chain fatty acid metabolic process [GO:0051791]; mitochondrial respiratory chain complex I assembly [GO:0032981]	K15980;	-0.120808	-0.242012	-0.248252	-0.185751	0.203529	0.229561	0.152453	0.133913	0.366317	0.00265597	0.957264	0.676519
ACADM_HUMAN	P11310	10	Medium-chain specific acyl-CoA dehydrogenase, mitochondrial (MCAD) (EC 1.3.8.7)	ACADM	carnitine biosynthetic process [GO:0045329]; carnitine metabolic process, CoA-linked [GO:0019254]; fatty acid beta-oxidation [GO:0006635]; fatty acid beta-oxidation using acyl-CoA dehydrogenase [GO:0033539]; medium-chain fatty acid catabolic process [GO:0051793]; medium-chain fatty acid metabolic process [GO:0051791]; oxidation-reduction process [GO:0055114]; regulation of lipid metabolic process…	K00249;	-0.231199	-0.238435	-0.26915	-0.264572	0.23073	0.22034	0.248533	0.223438	0.446102	7.3292e-06	0.997631	0.536366
ACADS_HUMAN	P16219	3	Short-chain specific acyl-CoA dehydrogenase, mitochondrial (SCAD) (EC 1.3.8.1) (Butyryl-CoA dehydrogenase)	ACADS	fatty acid beta-oxidation [GO:0006635]; fatty acid beta-oxidation using acyl-CoA dehydrogenase [GO:0033539]	K00248;	-0.570002	-0.358641	-0.323441	-0.492635	0.313404	0.381732	0.392921	0.393033	0.823163	8.84117e-05	0.980064	0.803288
ACADV_HUMAN	P49748	24	Very long-chain specific acyl-CoA dehydrogenase, mitochondrial (VLCAD) (EC 1.3.8.9)	ACADVL VLCAD	energy derivation by oxidation of organic compounds [GO:0015980]; epithelial cell differentiation [GO:0030855]; fatty acid beta-oxidation [GO:0006635]; fatty acid beta-oxidation using acyl-CoA dehydrogenase [GO:0033539]; IRE1-mediated unfolded protein response [GO:0036498]; negative regulation of fatty acid biosynthetic process [GO:0045717]; negative regulation of fatty acid oxidation [GO:0046322…	K09479;	-0.160266	-0.203727	-0.164923	-0.160823	0.183819	0.188867	0.114495	0.166493	0.315085	2.34922e-05	0.981332	0.897051
ACAP2_HUMAN	Q15057	3	Arf-GAP with coiled-coil, ANK repeat and PH domain-containing protein 2 (Centaurin-beta-2) (Cnt-b2)	ACAP2 CENTB2 KIAA0041	cellular response to nerve growth factor stimulus [GO:1990090]; protein localization to endosome [GO:0036010]	K12489;	-0.180625	-0.243495	-0.159495	-0.0429145	0.145451	0.159561	0.175478	0.166551	0.343971	3.18152e-06	0.997926	0.214654
ACBD6_HUMAN	Q9BR61	3	Acyl-CoA-binding domain-containing protein 6	ACBD6	acyl-CoA metabolic process [GO:0006637]		-0.0553089	-0.0675542	-0.101604	0.037424	-0.104562	-0.000559124	-0.145384	0.248561	-0.0449277	0.750103	0.808593	0.529417
ACBP_HUMAN	P07108	8	Acyl-CoA-binding protein (ACBP) (Diazepam-binding inhibitor) (DBI) (Endozepine) (EP)	DBI	acyl-CoA metabolic process [GO:0006637]; phosphatidylcholine acyl-chain remodeling [GO:0036151]	K08762;	0.121171	0.00773944	0.110871	0.144604	-0.142907	-0.152389	-0.0768881	-0.10987	-0.221022	0.0170104	0.978908	0.866166
ACDSB_HUMAN	P45954	2	Short/branched chain specific acyl-CoA dehydrogenase, mitochondrial (SBCAD) (EC 1.3.8.5) (2-methyl branched chain acyl-CoA dehydrogenase) (2-MEBCAD) (2-methylbutyryl-coenzyme A dehydrogenase) (2-methylbutyryl-CoA dehydrogenase)	ACADSB	branched-chain amino acid catabolic process [GO:0009083]; fatty acid metabolic process [GO:0006631]	K09478;	0.017287	0.130121	-0.159646	-0.0436695	-0.0307798	0.181329	0.00230507	0.00438381	-0.111035	0.589849	0.936547	0.779313
ACINU_HUMAN	Q9UKV3	14	Apoptotic chromatin condensation inducer in the nucleus (Acinus)	ACIN1 ACINUS KIAA0670	apoptotic chromosome condensation [GO:0030263]; erythrocyte differentiation [GO:0030218]; mRNA processing [GO:0006397]; negative regulation of mRNA splicing, via spliceosome [GO:0048025]; positive regulation of apoptotic process [GO:0043065]; positive regulation of monocyte differentiation [GO:0045657]; RNA splicing [GO:0008380]	K12875;	-0.0862161	-0.0912097	-0.0693097	-0.0489386	0.0900323	0.0932164	0.0478991	0.121693	0.166726	0.0130553	0.99334	0.992363
ACL6A_HUMAN	O96019	9	Actin-like protein 6A (53 kDa BRG1-associated factor A) (Actin-related protein Baf53a) (ArpNbeta) (BRG1-associated factor 53A) (BAF53A) (INO80 complex subunit K)	ACTL6A BAF53 BAF53A INO80K	ATP-dependent chromatin remodeling [GO:0043044]; chromatin remodeling [GO:0006338]; DNA recombination [GO:0006310]; DNA repair [GO:0006281]; histone H2A acetylation [GO:0043968]; histone H4 acetylation [GO:0043967]; neural retina development [GO:0003407]; protein deubiquitination [GO:0016579]; regulation of growth [GO:0040008]; regulation of transcription by RNA polymerase II [GO:0006357]; signal…	K11340;	0.0874757	0.109284	0.0940921	0.0481527	-0.097761	-0.0660538	-0.055877	-0.0601481	-0.167416	0.00176131	0.989463	0.686275
ACLY_HUMAN	P53396	32	ATP-citrate synthase (EC 2.3.3.8) (ATP-citrate (pro-S-)-lyase) (ACL) (Citrate cleavage enzyme)	ACLY	acetyl-CoA biosynthetic process [GO:0006085]; cholesterol biosynthetic process [GO:0006695]; citrate metabolic process [GO:0006101]; coenzyme A metabolic process [GO:0015936]; fatty acid biosynthetic process [GO:0006633]; fatty-acyl-CoA biosynthetic process [GO:0046949]; lipid biosynthetic process [GO:0008610]; neutrophil degranulation [GO:0043312]; oxaloacetate metabolic process [GO:0006107]; po…	K01648;	0.243211	0.219438	0.238673	0.2422	-0.36169	-0.372973	-0.31369	-0.305096	-0.591597	5.31018e-09	0.990919	0.946816
ACO13_HUMAN	Q9NPJ3	4	Acyl-coenzyme A thioesterase 13 (Acyl-CoA thioesterase 13) (EC 3.1.2.-) (Thioesterase superfamily member 2) [Cleaved into: Acyl-coenzyme A thioesterase 13, N-terminally processed]	ACOT13 THEM2 HT012 PNAS-27	acyl-CoA metabolic process [GO:0006637]; negative regulation of cold-induced thermogenesis [GO:0120163]; protein homotetramerization [GO:0051289]	K17362;	0.0104575	0.0268153	0.0310795	0.00296587	0.0706794	0.0799291	-0.017666	-0.0997587	0.0674677	0.412791	0.858436	0.896573
ACOC_HUMAN	P21399	21	Cytoplasmic aconitate hydratase (Aconitase) (EC 4.2.1.3) (Citrate hydro-lyase) (Ferritin repressor protein) (Iron regulatory protein 1) (IRP1) (Iron-responsive element-binding protein 1) (IRE-BP 1)	ACO1 IREB1	cellular iron ion homeostasis [GO:0006879]; citrate metabolic process [GO:0006101]; intestinal absorption [GO:0050892]; post-embryonic development [GO:0009791]; regulation of translation [GO:0006417]; response to iron(II) ion [GO:0010040]; tricarboxylic acid cycle [GO:0006099]	K01681;	-0.29761	-0.310794	-0.346373	-0.403804	0.336754	0.296334	0.224067	0.262043	0.63609	2.67742e-08	0.939015	0.404106
ACOD_HUMAN	O00767	2	Acyl-CoA desaturase (EC 1.14.19.1) (Delta(9)-desaturase) (Delta-9 desaturase) (Fatty acid desaturase) (Stearoyl-CoA desaturase) (hSCD1)	SCD	fatty-acyl-CoA biosynthetic process [GO:0046949]; monounsaturated fatty acid biosynthetic process [GO:1903966]; positive regulation of cold-induced thermogenesis [GO:0120162]; regulation of cholesterol biosynthetic process [GO:0045540]; unsaturated fatty acid biosynthetic process [GO:0006636]	K00507;	0.376935	0.22068	0.201923	0.347919	-0.762493	-0.321796	-0.549161	-0.211348	-1.12868	5.95478e-05	0.936547	0.33085
ACON_HUMAN	Q99798	24	Aconitate hydratase, mitochondrial (Aconitase) (EC 4.2.1.3) (Citrate hydro-lyase)	ACO2	citrate metabolic process [GO:0006101]; generation of precursor metabolites and energy [GO:0006091]; isocitrate metabolic process [GO:0006102]; liver development [GO:0001889]; response to isolation stress [GO:0035900]; tricarboxylic acid cycle [GO:0006099]	K01681;	-0.0942249	-0.132349	-0.146475	-0.117791	0.0927517	0.122628	0.122432	0.0876821	0.229181	6.59404e-05	0.997926	0.813563
ACOT8_HUMAN	O14734	2	Acyl-coenzyme A thioesterase 8 (Acyl-CoA thioesterase 8) (EC 3.1.2.27) (Choloyl-coenzyme A thioesterase) (HIV-Nef-associated acyl-CoA thioesterase) (PTE-2) (Peroxisomal acyl-coenzyme A thioester hydrolase 1) (PTE-1) (Peroxisomal long-chain acyl-CoA thioesterase 1) (Thioesterase II) (hACTE-III) (hACTEIII) (hTE)	ACOT8 ACTEIII PTE1 PTE2	acyl-CoA metabolic process [GO:0006637]; alpha-linolenic acid metabolic process [GO:0036109]; bile acid biosynthetic process [GO:0006699]; dicarboxylic acid catabolic process [GO:0043649]; fatty acid beta-oxidation using acyl-CoA oxidase [GO:0033540]; fatty acid catabolic process [GO:0009062]; negative regulation of CD4 biosynthetic process [GO:0045225]; peroxisome fission [GO:0016559]; protein t…	K11992;	0.15355	0.478574	-0.3225	-0.35832	-0.126458	-0.00718492	-0.0217083	-0.199474	-0.0685664	0.782021	0.85626	0.0698465
ACOT9_HUMAN	Q9Y305	10	Acyl-coenzyme A thioesterase 9, mitochondrial (Acyl-CoA thioesterase 9) (EC 3.1.2.-) (Acyl-CoA thioester hydrolase 9)	ACOT9 CGI-16	acyl-CoA metabolic process [GO:0006637]	K17361;	-0.162419	-0.175912	-0.200405	-0.119312	0.163604	0.146805	0.11068	0.159884	0.3399	0.000947013	0.997926	0.821165
ACOX1_HUMAN	Q15067	8	Peroxisomal acyl-coenzyme A oxidase 1 (AOX) (EC 1.3.3.6) (Palmitoyl-CoA oxidase) (Straight-chain acyl-CoA oxidase) (SCOX)	ACOX1 ACOX	alpha-linolenic acid metabolic process [GO:0036109]; cholesterol homeostasis [GO:0042632]; fatty acid beta-oxidation using acyl-CoA dehydrogenase [GO:0033539]; fatty acid beta-oxidation using acyl-CoA oxidase [GO:0033540]; fatty acid oxidation [GO:0019395]; generation of precursor metabolites and energy [GO:0006091]; lipid homeostasis [GO:0055088]; lipid metabolic process [GO:0006629]; peroxisome…	K00232;	-0.103275	-0.0733007	-0.185637	-0.124303	0.0957169	0.0467944	0.0712028	0.0809796	0.17922	0.022076	0.997926	0.604059
ACOX3_HUMAN	O15254	2	Peroxisomal acyl-coenzyme A oxidase 3 (EC 1.3.3.6) (Branched-chain acyl-CoA oxidase) (BRCACox) (Pristanoyl-CoA oxidase)	ACOX3 BRCOX PRCOX	fatty acid beta-oxidation using acyl-CoA dehydrogenase [GO:0033539]; fatty acid beta-oxidation using acyl-CoA oxidase [GO:0033540]; protein targeting to peroxisome [GO:0006625]	K00232;	-0.734077	-0.483991	-0.43445	-0.39662	0.372057	0.390892	0.339414	0.304486	1.07895	1.03872e-05	0.993272	0.691545
ACPH_HUMAN	P13798	10	Acylamino-acid-releasing enzyme (AARE) (EC 3.4.19.1) (Acyl-peptide hydrolase) (APH) (Acylaminoacyl-peptidase) (Oxidized protein hydrolase) (OPH)	APEH D3F15S2 D3S48E DNF15S2	amyloid-beta metabolic process [GO:0050435]; neutrophil degranulation [GO:0043312]; proteolysis [GO:0006508]; translational termination [GO:0006415]	K01303;	0.0920676	0.0751501	0.0381085	0.0230607	-0.0598241	-0.109293	-0.0825441	-0.0944462	-0.190064	0.00795208	0.993272	0.705752
ACSA_HUMAN	Q9NR19	8	Acetyl-coenzyme A synthetase, cytoplasmic (EC 6.2.1.1) (Acetate--CoA ligase) (Acetyl-CoA synthetase) (ACS) (AceCS) (Acyl-CoA synthetase short-chain family member 2) (Acyl-activating enzyme)	ACSS2 ACAS2	acetate biosynthetic process [GO:0019413]; acetyl-CoA biosynthetic process from acetate [GO:0019427]; ethanol oxidation [GO:0006069]; lipid biosynthetic process [GO:0008610]; propionate biosynthetic process [GO:0019542]	K01895;	-0.274957	-0.321683	-0.12245	-0.157326	0.293522	0.211189	0.246113	0.129848	0.539007	2.94613e-05	0.85626	0.276876
ACSF2_HUMAN	Q96CM8	8	Acyl-CoA synthetase family member 2, mitochondrial (EC 6.2.1.-)	ACSF2 UNQ493/PRO1009	acyl-CoA metabolic process [GO:0006637]; fatty acid metabolic process [GO:0006631]	K00666;	-0.378243	-0.430894	-0.464441	-0.446275	0.296492	0.280517	0.342073	0.331159	0.66556	2.54412e-07	0.968344	0.733245
ACSF3_HUMAN	Q4G176	2	Acyl-CoA synthetase family member 3, mitochondrial (EC 6.2.1.-)	ACSF3 PSEC0197	fatty acid biosynthetic process [GO:0006633]; fatty acid metabolic process [GO:0006631]; long-chain fatty-acyl-CoA biosynthetic process [GO:0035338]; malonate catabolic process [GO:0090410]	K18660;	0.0604838	-0.11487	-1.11126	-0.880874	0.155935	-0.525482	0.215637	-0.322414	0.0370934	0.952559	0.936547	0.0609916
ACSL1_HUMAN	P33121	5	Long-chain-fatty-acid--CoA ligase 1 (EC 6.2.1.3) (Acyl-CoA synthetase 1) (ACS1) (Long-chain acyl-CoA synthetase 1) (LACS 1) (Long-chain acyl-CoA synthetase 2) (LACS 2) (Long-chain fatty acid-CoA ligase 2) (Palmitoyl-CoA ligase 1) (Palmitoyl-CoA ligase 2)	ACSL1 FACL1 FACL2 LACS LACS1 LACS2	adiponectin-activated signaling pathway [GO:0033211]; alpha-linolenic acid metabolic process [GO:0036109]; linoleic acid metabolic process [GO:0043651]; lipid biosynthetic process [GO:0008610]; long-chain fatty acid import [GO:0044539]; long-chain fatty acid metabolic process [GO:0001676]; long-chain fatty-acyl-CoA biosynthetic process [GO:0035338]; positive regulation of cold-induced thermogenes…	K01897;	-0.114873	-0.227334	-0.289898	-0.168594	0.0687027	0.123296	0.0806063	0.100455	0.205405	0.0373875	0.988285	0.627732
ACSL3_HUMAN	O95573	18	Long-chain-fatty-acid--CoA ligase 3 (EC 6.2.1.3) (Long-chain acyl-CoA synthetase 3) (LACS 3)	ACSL3 ACS3 FACL3 LACS3	brain development [GO:0007420]; fatty acid biosynthetic process [GO:0006633]; long-chain fatty acid import [GO:0044539]; long-chain fatty-acyl-CoA biosynthetic process [GO:0035338]; positive regulation of Golgi to plasma membrane protein transport [GO:0042998]; positive regulation of phosphatidylcholine biosynthetic process [GO:2001247]; positive regulation of secretion [GO:0051047]; response to …	K01897;	0.175716	0.144411	0.224872	0.2056	-0.194354	-0.312587	-0.199248	-0.209383	-0.374099	4.02697e-06	0.934909	0.590496
ACSL4_HUMAN	O60488	2	Long-chain-fatty-acid--CoA ligase 4 (EC 6.2.1.3) (Long-chain acyl-CoA synthetase 4) (LACS 4)	ACSL4 ACS4 FACL4 LACS4	dendritic spine development [GO:0060996]; embryonic process involved in female pregnancy [GO:0060136]; fatty acid transport [GO:0015908]; lipid biosynthetic process [GO:0008610]; lipid metabolic process [GO:0006629]; long-chain fatty-acyl-CoA biosynthetic process [GO:0035338]; negative regulation of prostaglandin secretion [GO:0032307]; positive regulation of cell growth [GO:0030307]; response to…	K01897;	0.201086	0.128935	0.157646	0.383848	-0.275289	-0.28664	-0.238354	-0.0716511	-0.437629	0.00132925	0.92875	0.219604
ACTBL_HUMAN	Q562R1	2	Beta-actin-like protein 2 (Kappa-actin)	ACTBL2			-0.0665151	0.209948	0.036643	-0.0794369	-0.160403	-0.0952869	0.0224785	-0.313637	0.000737421	0.996713	0.915082	0.476683
ACTN1_HUMAN	P12814	47	Alpha-actinin-1 (Alpha-actinin cytoskeletal isoform) (F-actin cross-linking protein) (Non-muscle alpha-actinin-1)	ACTN1	actin crosslink formation [GO:0051764]; actin filament bundle assembly [GO:0051017]; actin filament network formation [GO:0051639]; actin filament organization [GO:0007015]; focal adhesion assembly [GO:0048041]; negative regulation of cellular component movement [GO:0051271]; platelet degranulation [GO:0002576]; platelet formation [GO:0030220]; platelet morphogenesis [GO:0036344]; regulation of a…	K05699;	0.0395593	0.00587186	0.00538412	0.0193368	-0.0421239	-0.0692456	-0.063957	0.0153471	-0.0666698	0.0716426	0.85626	0.902488
ACTN4_HUMAN	O43707	40	Alpha-actinin-4 (Non-muscle alpha-actinin 4)	ACTN4	actin filament bundle assembly [GO:0051017]; bicellular tight junction assembly [GO:0070830]; negative regulation of cellular component movement [GO:0051271]; negative regulation of substrate adhesion-dependent cell spreading [GO:1900025]; peroxisome proliferator activated receptor signaling pathway [GO:0035357]; platelet degranulation [GO:0002576]; positive regulation of cell migration [GO:00303…	K05699;	0.0141737	0.000673377	-0.0270322	-0.0147362	0.0093013	0.023544	0.00125274	0.0222622	-0.0207476	0.63134	0.981332	0.847716
ACTS_HUMAN	P68133	5	Actin, alpha skeletal muscle (Alpha-actin-1) [Cleaved into: Actin, alpha skeletal muscle, intermediate form]	ACTA1 ACTA	cellular response to organonitrogen compound [GO:0071417]; mesenchyme migration [GO:0090131]; muscle contraction [GO:0006936]; muscle filament sliding [GO:0030049]; positive regulation of gene expression [GO:0010628]; response to extracellular stimulus [GO:0009991]; response to lithium ion [GO:0010226]; response to mechanical stimulus [GO:0009612]; response to steroid hormone [GO:0048545]; skelet…	K10354;	-0.0447881	0.00851245	0.0777981	-0.118269	0.000479616	-0.0602764	-0.0335922	0.16598	0.181487	0.202322	0.936547	0.681545
ACTZ_HUMAN	P61163	9	Alpha-centractin (Centractin) (ARP1) (Actin-RPV) (Centrosome-associated actin homolog)	ACTR1A CTRN1	antigen processing and presentation of exogenous peptide antigen via MHC class II [GO:0019886]; ciliary basal body-plasma membrane docking [GO:0097711]; ER to Golgi vesicle-mediated transport [GO:0006888]; G2/M transition of mitotic cell cycle [GO:0000086]; regulation of G2/M transition of mitotic cell cycle [GO:0010389]; spermatogenesis [GO:0007283]; vesicle-mediated transport [GO:0016192]	K16575;	-0.0128404	-0.0230357	0.019187	0.0306758	-0.0207717	0.00545748	-0.0311178	0.105909	0.0589663	0.434767	0.970538	0.901416
ACYP1_HUMAN	P07311	3	Acylphosphatase-1 (EC 3.6.1.7) (Acylphosphatase, erythrocyte isozyme) (Acylphosphatase, organ-common type isozyme) (Acylphosphate phosphohydrolase 1)	ACYP1 ACYPE	phosphate-containing compound metabolic process [GO:0006796]	K01512;	-0.579989	-0.555645	-0.607398	-0.616196	0.469664	0.458321	0.465333	0.384427	1.0457	3.02801e-09	0.936547	0.71823
ADA_HUMAN	P00813	5	Adenosine deaminase (EC 3.5.4.4) (Adenosine aminohydrolase)	ADA ADA1	adenosine catabolic process [GO:0006154]; aging [GO:0007568]; cell adhesion [GO:0007155]; dATP catabolic process [GO:0046061]; deoxyadenosine catabolic process [GO:0006157]; embryonic digestive tract development [GO:0048566]; germinal center B cell differentiation [GO:0002314]; histamine secretion [GO:0001821]; hypoxanthine salvage [GO:0043103]; inosine biosynthetic process [GO:0046103]; liver de…	K01488;	-0.216082	-0.120235	-0.19142	-0.136491	0.231459	0.177657	0.203186	0.0856761	0.406108	0.000221761	0.936547	0.873519
ADA10_HUMAN	O14672	5	Disintegrin and metalloproteinase domain-containing protein 10 (ADAM 10) (EC 3.4.24.81) (CDw156) (Kuzbanian protein homolog) (Mammalian disintegrin-metalloprotease) (CD antigen CD156c)	ADAM10 KUZ MADM	cell-cell signaling [GO:0007267]; cellular protein metabolic process [GO:0044267]; constitutive protein ectodomain proteolysis [GO:0051089]; extracellular matrix disassembly [GO:0022617]; integrin-mediated signaling pathway [GO:0007229]; in utero embryonic development [GO:0001701]; membrane protein ectodomain proteolysis [GO:0006509]; monocyte activation [GO:0042117]; negative regulation of cell …	K06704;	0.0170465	-0.0737945	0.0438923	-0.0141322	0.0258424	-0.0130151	0.060817	0.0341269	-0.0218957	0.805827	0.988285	0.877636
ADAS_HUMAN	O00116	9	Alkyldihydroxyacetonephosphate synthase, peroxisomal (Alkyl-DHAP synthase) (EC 2.5.1.26) (Aging-associated gene 5 protein) (Alkylglycerone-phosphate synthase)	AGPS AAG5	ether lipid biosynthetic process [GO:0008611]; lipid biosynthetic process [GO:0008610]; protein targeting to peroxisome [GO:0006625]	K00803;	0.0133203	-0.0606356	0.00535837	0.0583225	-0.0534428	0.0160243	-0.0346293	-0.0487237	-0.0522573	0.298474	0.936547	0.628369
ADDA_HUMAN	P35611	9	Alpha-adducin (Erythrocyte adducin subunit alpha)	ADD1 ADDA	actin cytoskeleton organization [GO:0030036]; actin filament bundle assembly [GO:0051017]; barbed-end actin filament capping [GO:0051016]; cell morphogenesis [GO:0000902]; cellular response to calcium ion [GO:0071277]; cell volume homeostasis [GO:0006884]; erythrocyte differentiation [GO:0030218]; hemoglobin metabolic process [GO:0020027]; homeostasis of number of cells within a tissue [GO:004887…	K18622;	-0.128585	-0.187757	-0.187638	-0.245015	0.13161	0.124982	0.171834	0.116783	0.302531	1.57755e-05	0.988285	0.787613
ADDG_HUMAN	Q9UEY8	3	Gamma-adducin (Adducin-like protein 70)	ADD3 ADDL	transmembrane transport [GO:0055085]	K18622;	-0.0283094	-0.232418	-0.387879	-0.458647	0.301047	0.0939088	0.297466	0.112913	0.347681	0.0570496	0.694032	0.499821
ADHX_HUMAN	P11766	7	Alcohol dehydrogenase class-3 (EC 1.1.1.1) (Alcohol dehydrogenase 5) (Alcohol dehydrogenase class chi chain) (Alcohol dehydrogenase class-III) (Glutathione-dependent formaldehyde dehydrogenase) (FALDH) (FDH) (GSH-FDH) (EC 1.1.1.-) (S-(hydroxymethyl)glutathione dehydrogenase) (EC 1.1.1.284)	ADH5 ADHX FDH	ethanol oxidation [GO:0006069]; formaldehyde catabolic process [GO:0046294]; peptidyl-cysteine S-nitrosylation [GO:0018119]; positive regulation of blood pressure [GO:0045777]; respiratory system process [GO:0003016]; response to lipopolysaccharide [GO:0032496]; response to nitrosative stress [GO:0051409]; response to redox state [GO:0051775]; retinoid metabolic process [GO:0001523]	K00121;	-0.0480103	-0.0544568	-0.037701	-0.061253	0.0400135	0.00730358	-0.030967	0.0494287	0.0747344	0.175371	0.913278	0.979449
ADK_HUMAN	P55263	9	Adenosine kinase (AK) (EC 2.7.1.20) (Adenosine 5'-phosphotransferase)	ADK	adenosine salvage [GO:0006169]; AMP salvage [GO:0044209]; carbohydrate phosphorylation [GO:0046835]; dATP biosynthetic process [GO:0006175]; purine-containing compound salvage [GO:0043101]; ribonucleoside monophosphate biosynthetic process [GO:0009156]	K00856;	-0.0174614	0.0195454	0.0160063	0.00820178	0.0612566	-0.023158	-0.0514868	-0.0338817	0.070064	0.182949	0.92875	0.982533
ADNP_HUMAN	Q9H2P0	6	Activity-dependent neuroprotector homeobox protein (Activity-dependent neuroprotective protein)	ADNP ADNP1 KIAA0784	activation of protein kinase activity [GO:0032147]; cellular response to extracellular stimulus [GO:0031668]; estrous cycle [GO:0044849]; negative regulation of gene expression [GO:0010629]; negative regulation of neuron apoptotic process [GO:0043524]; negative regulation of protein binding [GO:0032091]; negative regulation of synaptic transmission [GO:0050805]; nitric oxide homeostasis [GO:00334…	K22591;	0.00703104	0.00759582	0.0508579	0.104176	-0.0901905	-0.0289784	-0.044385	-0.0914745	-0.130606	0.0532335	0.936547	0.770237
ADPGK_HUMAN	Q9BRR6	3	ADP-dependent glucokinase (ADP-GK) (ADPGK) (EC 2.7.1.147) (RbBP-35)	ADPGK PSEC0260	canonical glycolysis [GO:0061621]; glucose metabolic process [GO:0006006]	K08074;	0.0120135	0.0314142	-0.0891728	-0.016916	-0.0480971	-0.0666559	0.0153621	-0.0237158	-0.0806959	0.340695	0.983852	0.460729
ADPPT_HUMAN	Q9NRN7	3	L-aminoadipate-semialdehyde dehydrogenase-phosphopantetheinyl transferase (EC 2.7.8.-) (4'-phosphopantetheinyl transferase) (Alpha-aminoadipic semialdehyde dehydrogenase-phosphopantetheinyl transferase) (AASD-PPT) (LYS5 ortholog)	AASDHPPT CGI-80 HAH-P HSPC223 x0005	lysine biosynthetic process via aminoadipic acid [GO:0019878]; pantothenate metabolic process [GO:0015939]	K06133;	0.148455	0.172607	0.0422194	0.024291	-0.11731	-0.128494	-0.085397	-0.191326	-0.243209	0.000667998	0.913278	0.590496
ADRM1_HUMAN	Q16186	4	Proteasomal ubiquitin receptor ADRM1 (110 kDa cell membrane glycoprotein) (Gp110) (Adhesion-regulating molecule 1) (ARM-1) (Proteasome regulatory particle non-ATPase 13) (hRpn13) (Rpn13 homolog)	ADRM1 GP110	proteasome assembly [GO:0043248]; protein deubiquitination [GO:0016579]; transcription elongation from RNA polymerase II promoter [GO:0006368]; ubiquitin-dependent protein catabolic process [GO:0006511]	K06691;	0.236546	0.141581	0.205361	0.319561	-0.271022	-0.413515	-0.261156	-0.19891	-0.524814	0.000492002	0.85626	0.810197
ADRO_HUMAN	P22570	12	NADPH:adrenodoxin oxidoreductase, mitochondrial (AR) (Adrenodoxin reductase) (EC 1.18.1.6) (Ferredoxin--NADP(+) reductase) (Ferredoxin reductase)	FDXR ADXR	C21-steroid hormone biosynthetic process [GO:0006700]; cholesterol metabolic process [GO:0008203]; generation of precursor metabolites and energy [GO:0006091]; oxidation-reduction process [GO:0055114]; steroid biosynthetic process [GO:0006694]; sterol metabolic process [GO:0016125]; ubiquinone biosynthetic process [GO:0006744]	K18914;	-0.568454	-0.594182	-0.56421	-0.606987	0.387876	0.483961	0.429958	0.336415	0.945495	2.62892e-08	0.988285	0.814068
ADT1_HUMAN	P12235	3	ADP/ATP translocase 1 (ADP,ATP carrier protein 1) (ADP,ATP carrier protein, heart/skeletal muscle isoform T1) (Adenine nucleotide translocator 1) (ANT 1) (Solute carrier family 25 member 4)	SLC25A4 ANT1	ADP transport [GO:0015866]; apoptotic mitochondrial changes [GO:0008637]; generation of precursor metabolites and energy [GO:0006091]; mitochondrial genome maintenance [GO:0000002]; negative regulation of necroptotic process [GO:0060546]; regulation of insulin secretion [GO:0050796]; regulation of mitochondrial membrane permeability [GO:0046902]; viral process [GO:0016032]	K05863;	-0.40564	-0.650248	-0.75737	-0.872869	0.604909	0.48704	0.428205	0.468703	1.14802	8.92991e-05	0.908738	0.568145
ADT2_HUMAN	P05141	11	ADP/ATP translocase 2 (ADP,ATP carrier protein 2) (ADP,ATP carrier protein, fibroblast isoform) (Adenine nucleotide translocator 2) (ANT 2) (Solute carrier family 25 member 5) [Cleaved into: ADP/ATP translocase 2, N-terminally processed]	SLC25A5 ANT2	cellular response to leukemia inhibitory factor [GO:1990830]; chromosome segregation [GO:0007059]; negative regulation of mitochondrial outer membrane permeabilization involved in apoptotic signaling pathway [GO:1901029]; positive regulation of cell proliferation [GO:0008284]; regulation of insulin secretion [GO:0050796]; viral process [GO:0016032]	K05863;	-0.0107202	-0.0223198	-0.0317776	0.0651456	0.0935846	-0.051344	0.0301699	0.0798745	0.0633969	0.407381	0.935395	0.748098
ADT3_HUMAN	P12236	3	ADP/ATP translocase 3 (ADP,ATP carrier protein 3) (ADP,ATP carrier protein, isoform T2) (ANT 2) (Adenine nucleotide translocator 3) (ANT 3) (Solute carrier family 25 member 6) [Cleaved into: ADP/ATP translocase 3, N-terminally processed]	SLC25A6 ANT3 CDABP0051	active induction of host immune response by virus [GO:0046732]; apoptotic process [GO:0006915]; protein targeting to mitochondrion [GO:0006626]; regulation of insulin secretion [GO:0050796]; regulation of mitochondrial membrane permeability [GO:0046902]	K05863;	-0.129394	-0.0233022	-0.0761748	0.0855296	0.0850319	-0.127828	0.0984121	0.0764139	0.130781	0.369821	0.85837	0.719731
AFAD_HUMAN	P55196	27	Afadin (ALL1-fused gene from chromosome 6 protein) (Protein AF-6) (Afadin adherens junction formation factor)	AFDN AF6 MLLT4	adherens junction organization [GO:0034332]; cell adhesion [GO:0007155]; cell-cell signaling [GO:0007267]; establishment of endothelial intestinal barrier [GO:0090557]; negative regulation of cell migration [GO:0030336]; positive regulation of GTPase activity [GO:0043547]; regulation of protein localization [GO:0032880]; signal transduction [GO:0007165]	K05702;	-0.185825	-0.202974	-0.239741	-0.235716	0.195058	0.174851	0.159447	0.154646	0.377257	2.08067e-05	0.988285	0.693891
AFF4_HUMAN	Q9UHB7	4	AF4/FMR2 family member 4 (ALL1-fused gene from chromosome 5q31 protein) (Protein AF-5q31) (Major CDK9 elongation factor-associated protein)	AFF4 AF5Q31 MCEF HSPC092	spermatid development [GO:0007286]; transcription by RNA polymerase II [GO:0006366]; transcription elongation from RNA polymerase II promoter [GO:0006368]	K15185;	-0.0922005	-0.122322	-0.0580888	-0.0022533	0.0918809	0.0837139	0.0402944	0.106257	0.241081	0.073021	0.966567	0.572121
AFG32_HUMAN	Q9Y4W6	10	AFG3-like protein 2 (EC 3.4.24.-) (Paraplegin-like protein)	AFG3L2	axonogenesis [GO:0007409]; calcium import into the mitochondrion [GO:0036444]; cristae formation [GO:0042407]; mitochondrial calcium ion homeostasis [GO:0051560]; mitochondrial calcium ion transmembrane transport [GO:0006851]; mitochondrial fusion [GO:0008053]; mitochondrial protein processing [GO:0034982]; muscle fiber development [GO:0048747]; myelination [GO:0042552]; nerve development [GO:002…	K08956;	0.00303829	-0.00132307	0.0105702	-0.0146091	-0.00188857	-0.0126114	0.0355226	-0.0313068	0.0148115	0.804568	0.96323	0.852932
AGAL_HUMAN	P06280	5	Alpha-galactosidase A (EC 3.2.1.22) (Alpha-D-galactosidase A) (Alpha-D-galactoside galactohydrolase) (Melibiase) (Agalsidase)	GLA	glycoside catabolic process [GO:0016139]; glycosphingolipid catabolic process [GO:0046479]; glycosphingolipid metabolic process [GO:0006687]; glycosylceramide catabolic process [GO:0046477]; negative regulation of nitric oxide biosynthetic process [GO:0045019]; negative regulation of nitric-oxide synthase activity [GO:0051001]; neutrophil degranulation [GO:0043312]; oligosaccharide metabolic proc…	K01189;	-0.491665	-0.314584	-0.214239	-0.208249	0.186395	0.23196	0.278363	0.164714	0.688447	0.00256806	0.999413	0.564918
AGAP3_HUMAN	Q96P47	2	Arf-GAP with GTPase, ANK repeat and PH domain-containing protein 3 (AGAP-3) (CRAM-associated GTPase) (CRAG) (Centaurin-gamma-3) (Cnt-g3) (MR1-interacting protein) (MRIP-1)	AGAP3 CENTG3	cellular response to reactive oxygen species [GO:0034614]; proteasome-mediated ubiquitin-dependent protein catabolic process [GO:0043161]; protein import into nucleus, translocation [GO:0000060]; signal transduction [GO:0007165]	K12491;	-0.333913	-0.371741	-0.0799266	-0.102403	0.21814	0.1071	0.222874	0.115945	0.535751	0.0274984	0.879438	0.553712
AGFG1_HUMAN	P52594	8	Arf-GAP domain and FG repeat-containing protein 1 (HIV-1 Rev-binding protein) (Nucleoporin-like protein RIP) (Rev-interacting protein) (Rev/Rex activation domain-binding protein)	AGFG1 HRB RAB RIP	acrosome assembly [GO:0001675]; intermediate filament organization [GO:0045109]; membrane organization [GO:0061024]; mRNA export from nucleus [GO:0006406]; multicellular organism development [GO:0007275]; spermatid nucleus differentiation [GO:0007289]	K15044;	-0.122778	-0.155542	-0.200745	-0.151772	0.0455224	0.0924396	0.173579	0.115511	0.232815	0.00228292	0.990919	0.776377
AGK_HUMAN	Q53H12	5	Acylglycerol kinase, mitochondrial (hAGK) (EC 2.7.1.107) (EC 2.7.1.94) (Multiple substrate lipid kinase) (HsMuLK) (MuLK) (Multi-substrate lipid kinase)	AGK MULK	ceramide biosynthetic process [GO:0046513]; glycerophospholipid biosynthetic process [GO:0046474]; protein import into mitochondrial inner membrane [GO:0045039]	K09881;	-0.01191	-0.121694	-0.0576113	-0.080181	0.0831012	0.139423	-0.0778884	0.0603844	0.0594965	0.423279	0.92875	0.770237
AGM1_HUMAN	O95394	7	Phosphoacetylglucosamine mutase (PAGM) (EC 5.4.2.3) (Acetylglucosamine phosphomutase) (N-acetylglucosamine-phosphate mutase) (Phosphoglucomutase-3) (PGM 3)	PGM3 AGM1	carbohydrate metabolic process [GO:0005975]; glucosamine metabolic process [GO:0006041]; glucose 1-phosphate metabolic process [GO:0019255]; hemopoiesis [GO:0030097]; protein N-linked glycosylation [GO:0006487]; protein O-linked glycosylation [GO:0006493]; spermatogenesis [GO:0007283]; UDP-N-acetylglucosamine biosynthetic process [GO:0006048]	K01836;	-0.0570548	-0.173133	-0.135619	-0.150803	0.143283	0.15169	0.0075529	0.119297	0.216654	0.00475607	0.908738	0.851406
AGO1_HUMAN	Q9UL18	3	Protein argonaute-1 (Argonaute1) (hAgo1) (Argonaute RISC catalytic component 1) (Eukaryotic translation initiation factor 2C 1) (eIF-2C 1) (eIF2C 1) (Putative RNA-binding protein Q99)	AGO1 EIF2C1	miRNA loading onto RISC involved in gene silencing by miRNA [GO:0035280]; miRNA mediated inhibition of translation [GO:0035278]; miRNA metabolic process [GO:0010586]; negative regulation of angiogenesis [GO:0016525]; negative regulation of gene expression [GO:0010629]; nuclear-transcribed mRNA catabolic process [GO:0000956]; positive regulation of gene expression [GO:0010628]; positive regulation…	K11593;	-0.400445	-0.456188	-0.384721	-0.458035	0.33764	0.265147	0.370548	0.316115	0.789909	1.15085e-07	0.981332	0.917403
AGO2_HUMAN	Q9UKV8	8	Protein argonaute-2 (Argonaute2) (hAgo2) (EC 3.1.26.n2) (Argonaute RISC catalytic component 2) (Eukaryotic translation initiation factor 2C 2) (eIF-2C 2) (eIF2C 2) (PAZ Piwi domain protein) (PPD) (Protein slicer)	AGO2 EIF2C2	gene silencing by RNA [GO:0031047]; miRNA loading onto RISC involved in gene silencing by miRNA [GO:0035280]; miRNA mediated inhibition of translation [GO:0035278]; miRNA metabolic process [GO:0010586]; mRNA cleavage involved in gene silencing by miRNA [GO:0035279]; mRNA cleavage involved in gene silencing by siRNA [GO:0090625]; negative regulation of gene expression [GO:0010629]; negative regula…	K11593;	-0.170394	-0.103853	-0.177548	-0.121933	0.161424	0.141429	0.165404	0.173643	0.380341	0.000129046	0.997631	0.708439
AGRG1_HUMAN	Q9Y653	2	Adhesion G-protein coupled receptor G1 (G-protein coupled receptor 56) (Protein TM7XN1) [Cleaved into: ADGRG1 N-terminal fragment (ADGRG1 NT) (GPR56 N-terminal fragment) (GPR56 NT) (GPR56(N)) (GPR56 extracellular subunit) (GPR56 subunit alpha); ADGRG1 C-terminal fragment (ADGRG1 CT) (GPR56 C-terminal fragment) (GPR56 CT) (GPR56(C)) (GPR56 seven-transmembrane subunit) (GPR56 7TM) (GPR56 subunit be…	ADGRG1 GPR56 TM7LN4 TM7XN1 UNQ540/PRO1083	angiogenesis [GO:0001525]; brain development [GO:0007420]; cell adhesion [GO:0007155]; cell-cell signaling [GO:0007267]; cell migration [GO:0016477]; cell surface receptor signaling pathway [GO:0007166]; cerebral cortex radial glia guided migration [GO:0021801]; cerebral cortex regionalization [GO:0021796]; G-protein coupled receptor signaling pathway [GO:0007186]; layer formation in cerebral cor…	K08450;	0.234319	0.0696495	0.119004	0.439158	-0.318765	-0.128302	-0.328582	-0.235323	-0.6517	0.00467417	0.936547	0.37362
AGRG6_HUMAN	Q86SQ4	3	Adhesion G-protein coupled receptor G6 (Developmentally regulated G-protein-coupled receptor) (G-protein coupled receptor 126) (Vascular inducible G protein-coupled receptor) [Cleaved into: ADGRG6 N-terminal fragment (ADGRG6-NTF); ADGRG6 C-terminal fragment (ADGRG6-CTF)]	ADGRG6 DREG GPR126 VIGR	adenylate cyclase-activating G-protein coupled receptor signaling pathway [GO:0007189]; cAMP-mediated signaling [GO:0019933]; cell surface receptor signaling pathway [GO:0007166]; G-protein coupled receptor signaling pathway [GO:0007186]; heart trabecula formation [GO:0060347]; mitochondrion organization [GO:0007005]; myelination [GO:0042552]; myelination in peripheral nervous system [GO:0022011]…	K08463;	0.15418	0.203999	-0.172753	-0.29543	0.114381	-0.045764	0.0140063	-0.138195	-0.0709272	0.700106	0.85626	0.281188
AGRIN_HUMAN	O00468	17	Agrin [Cleaved into: Agrin N-terminal 110 kDa subunit; Agrin C-terminal 110 kDa subunit; Agrin C-terminal 90 kDa fragment (C90); Agrin C-terminal 22 kDa fragment (C22)]	AGRN AGRIN	clustering of voltage-gated sodium channels [GO:0045162]; extracellular matrix organization [GO:0030198]; glycosaminoglycan biosynthetic process [GO:0006024]; glycosaminoglycan catabolic process [GO:0006027]; G-protein coupled acetylcholine receptor signaling pathway [GO:0007213]; positive regulation of filopodium assembly [GO:0051491]; positive regulation of GTPase activity [GO:0043547]; positiv…	K06254;	-0.125589	-0.103047	-0.191533	-0.246538	0.267465	0.154887	0.0979241	0.132438	0.39268	1.72606e-06	0.808012	0.194046
AGRL2_HUMAN	O95490	3	Adhesion G protein-coupled receptor L2 (Calcium-independent alpha-latrotoxin receptor 2) (CIRL-2) (Latrophilin homolog 1) (Latrophilin-2) (Lectomedin-1)	ADGRL2 KIAA0786 LEC1 LPHH1 LPHN2	cell surface receptor signaling pathway [GO:0007166]; G-protein coupled receptor signaling pathway [GO:0007186]	K04593;	-0.290971	-0.0171102	-0.132398	-0.212074	0.281603	0.189156	0.118659	0.210685	0.491553	0.000285162	0.997926	0.454604
AHNK_HUMAN	Q09666	295	Neuroblast differentiation-associated protein AHNAK (Desmoyokin)	AHNAK PM227	protein complex oligomerization [GO:0051259]; regulation of RNA splicing [GO:0043484]; regulation of voltage-gated calcium channel activity [GO:1901385]		-0.187887	-0.160249	-0.150078	-0.167569	0.140894	0.135542	0.109079	0.117262	0.330119	4.14633e-06	0.994175	0.917403
AHNK2_HUMAN	Q8IVF2	31	Protein AHNAK2	AHNAK2 C14orf78 KIAA2019			-0.391452	-0.320559	-0.333467	-0.34375	0.268858	0.324637	0.289075	0.302934	0.66946	7.91709e-09	0.988407	0.738291
AHSA1_HUMAN	O95433	13	Activator of 90 kDa heat shock protein ATPase homolog 1 (AHA1) (p38)	AHSA1 C14orf3 HSPC322	positive regulation of ATPase activity [GO:0032781]; response to stress [GO:0006950]		0.244162	0.27057	0.181262	0.22679	-0.315746	-0.316586	-0.347456	-0.287273	-0.552722	6.17689e-08	0.954578	0.651292
AIDA_HUMAN	Q96BJ3	2	Axin interactor, dorsalization-associated protein (Axin interaction partner and dorsalization antagonist)	AIDA C1orf80	determination of ventral identity [GO:0048264]; dorsal/ventral pattern formation [GO:0009953]; negative regulation of JNK cascade [GO:0046329]; negative regulation of JUN kinase activity [GO:0043508]; regulation of protein homodimerization activity [GO:0043496]		0.419557	0.457864	-0.860231	-1.42681	-0.325245	0.343472	-0.0420693	0.0965701	-0.0708757	0.920137	0.988285	0.400657
AIFM1_HUMAN	O95831	13	Apoptosis-inducing factor 1, mitochondrial (EC 1.1.1.-) (Programmed cell death protein 8)	AIFM1 AIF PDCD8	activation of cysteine-type endopeptidase activity involved in apoptotic process [GO:0006919]; apoptotic process [GO:0006915]; cellular response to aldosterone [GO:1904045]; cellular response to estradiol stimulus [GO:0071392]; cellular response to hydrogen peroxide [GO:0070301]; cellular response to nitric oxide [GO:0071732]; cellular response to oxygen-glucose deprivation [GO:0090650]; chromoso…	K04727;	0.108529	0.0642889	0.0831954	0.0967561	-0.110876	-0.0466138	-0.0992926	-0.10771	-0.209751	0.000297174	0.928091	0.888167
AIMP1_HUMAN	Q12904	10	Aminoacyl tRNA synthase complex-interacting multifunctional protein 1 (Multisynthase complex auxiliary component p43) [Cleaved into: Endothelial monocyte-activating polypeptide 2 (EMAP-2) (Endothelial monocyte-activating polypeptide II) (EMAP-II) (Small inducible cytokine subfamily E member 1)]	AIMP1 EMAP2 SCYE1	angiogenesis [GO:0001525]; apoptotic process [GO:0006915]; cell adhesion [GO:0007155]; cell-cell signaling [GO:0007267]; chemotaxis [GO:0006935]; defense response to virus [GO:0051607]; inflammatory response [GO:0006954]; leukocyte migration [GO:0050900]; negative regulation of endothelial cell proliferation [GO:0001937]; positive regulation of glucagon secretion [GO:0070094]; response to woundin…	K15437;	0.14811	0.17896	0.157563	0.142586	-0.167615	-0.161525	-0.117904	-0.153	-0.301717	4.58164e-05	0.988285	0.979449
AIMP2_HUMAN	Q13155	5	Aminoacyl tRNA synthase complex-interacting multifunctional protein 2 (Multisynthase complex auxiliary component p38) (Protein JTV-1)	AIMP2 JTV1 PRO0992	apoptotic process [GO:0006915]; negative regulation of cell proliferation [GO:0008285]; positive regulation of aminoacyl-tRNA ligase activity [GO:1903632]; positive regulation of neuron death [GO:1901216]; positive regulation of protein ubiquitination [GO:0031398]; protein-containing complex assembly [GO:0065003]; tRNA aminoacylation for protein translation [GO:0006418]; type II pneumocyte differ…	K15438;	0.147624	0.0735066	0.124268	0.220495	-0.169689	-0.159447	-0.173908	-0.226611	-0.281938	0.00070125	0.997926	0.299006
AIP_HUMAN	O00170	7	AH receptor-interacting protein (AIP) (Aryl-hydrocarbon receptor-interacting protein) (HBV X-associated protein 2) (XAP-2) (Immunophilin homolog ARA9)	AIP XAP2	interleukin-12-mediated signaling pathway [GO:0035722]; negative regulation of cyclic-nucleotide phosphodiesterase activity [GO:0051344]; protein maturation by protein folding [GO:0022417]; protein targeting to mitochondrion [GO:0006626]; regulation of protein kinase A signaling [GO:0010738]; xenobiotic metabolic process [GO:0006805]	K17767;	-0.169804	-0.1201	-0.192794	-0.131494	0.141662	0.135559	0.186462	0.177594	0.299245	0.00348108	0.981332	0.705966
AK1A1_HUMAN	P14550	13	Alcohol dehydrogenase [NADP(+)] (EC 1.1.1.2) (Aldehyde reductase) (Aldo-keto reductase family 1 member A1)	AKR1A1 ALDR1 ALR	aldehyde catabolic process [GO:0046185]; cellular aldehyde metabolic process [GO:0006081]; D-glucuronate catabolic process [GO:0042840]; glucose metabolic process [GO:0006006]; glucuronate catabolic process to xylulose 5-phosphate [GO:0019640]; glutathione derivative biosynthetic process [GO:1901687]; L-ascorbic acid biosynthetic process [GO:0019853]	K00002;	-0.44976	-0.406209	-0.521259	-0.561127	0.411729	0.34543	0.410124	0.277476	0.843149	7.18374e-10	0.703912	0.565415
AKA12_HUMAN	Q02952	10	A-kinase anchor protein 12 (AKAP-12) (A-kinase anchor protein 250 kDa) (AKAP 250) (Gravin) (Myasthenia gravis autoantigen)	AKAP12 AKAP250	adenylate cyclase-inhibiting G-protein coupled receptor signaling pathway [GO:0007193]; G-protein coupled receptor signaling pathway [GO:0007186]; positive regulation of protein kinase A signaling [GO:0010739]; protein targeting [GO:0006605]; regulation of protein kinase A signaling [GO:0010738]; regulation of protein kinase C signaling [GO:0090036]	K16528;	0.238332	0.310573	0.131208	0.1476	-0.237937	-0.336758	-0.344555	-0.209301	-0.435392	3.32716e-05	0.92875	0.400868
AKAP2_HUMAN	Q9Y2D5	11	A-kinase anchor protein 2 (AKAP-2) (AKAP-KL) (Protein kinase A-anchoring protein 2) (PRKA2)	AKAP2 KIAA0920 PRKA2		K16519;	0.0177095	0.052586	0.0282564	0.0931085	-0.0355475	-0.126673	-0.0489266	-0.086738	-0.100799	0.189571	0.989587	0.684962
AKAP8_HUMAN	O43823	5	A-kinase anchor protein 8 (AKAP-8) (A-kinase anchor protein 95 kDa) (AKAP 95)	AKAP8 AKAP95	cell cycle G2/M phase transition [GO:0044839]; cellular response to lipopolysaccharide [GO:0071222]; cellular response to prostaglandin E stimulus [GO:0071380]; innate immune response [GO:0045087]; mitotic cell cycle [GO:0000278]; mitotic chromosome condensation [GO:0007076]; negative regulation of tumor necrosis factor production [GO:0032720]; positive regulation of histone deacetylation [GO:003…	K16525;	0.0706444	0.120615	0.0758003	0.0485194	-0.176578	-0.0924606	-0.0506679	-0.0570655	-0.216646	0.0350189	0.981332	0.950656
AKAP9_HUMAN	Q99996	6	A-kinase anchor protein 9 (AKAP-9) (A-kinase anchor protein 350 kDa) (AKAP 350) (hgAKAP 350) (A-kinase anchor protein 450 kDa) (AKAP 450) (AKAP 120-like protein) (Centrosome- and Golgi-localized PKN-associated protein) (CG-NAP) (Protein hyperion) (Protein kinase A-anchoring protein 9) (PRKA9) (Protein yotiao)	AKAP9 AKAP350 AKAP450 KIAA0803	cellular response to cAMP [GO:0071320]; chemical synaptic transmission [GO:0007268]; ciliary basal body-plasma membrane docking [GO:0097711]; G2/M transition of mitotic cell cycle [GO:0000086]; maintenance of centrosome location [GO:0051661]; MAPK cascade [GO:0000165]; microtubule nucleation [GO:0007020]; negative regulation of adenylate cyclase activity [GO:0007194]; positive regulation of micro…	K16551;	-0.156365	-0.177377	-0.368051	-0.25608	0.18553	0.261247	0.208475	0.152197	0.342552	0.000623104	0.989463	0.637444
AKP13_HUMAN	Q12802	5	A-kinase anchor protein 13 (AKAP-13) (AKAP-Lbc) (Breast cancer nuclear receptor-binding auxiliary protein) (Guanine nucleotide exchange factor Lbc) (Human thyroid-anchoring protein 31) (Lymphoid blast crisis oncogene) (LBC oncogene) (Non-oncogenic Rho GTPase-specific GTP exchange factor) (Protein kinase A-anchoring protein 13) (PRKA13) (p47)	AKAP13 BRX HT31 LBC	adenylate cyclase-activating adrenergic receptor signaling pathway involved in heart process [GO:0086023]; adrenergic receptor signaling pathway [GO:0071875]; bone development [GO:0060348]; cardiac muscle cell differentiation [GO:0055007]; G-protein coupled receptor signaling pathway [GO:0007186]; heart development [GO:0007507]; nuclear export [GO:0051168]; positive regulation of apoptotic proces…	K16529;	0.0820968	0.118069	0.100121	-0.00339395	-0.0372249	-0.119048	-0.133205	-0.0416965	-0.200053	0.0826765	0.997926	0.590496
AKP8L_HUMAN	Q9ULX6	2	A-kinase anchor protein 8-like (AKAP8-like protein) (Helicase A-binding protein 95) (HAP95) (Homologous to AKAP95 protein) (HA95) (Neighbor of A-kinase-anchoring protein 95) (Neighbor of AKAP95)	AKAP8L NAKAP NAKAP95 HRIHFB2018	cell cycle G2/M phase transition [GO:0044839]; mitotic chromosome condensation [GO:0007076]; mRNA processing [GO:0006397]; nuclear envelope disassembly [GO:0051081]; positive regulation of histone deacetylation [GO:0031065]; positive regulation of transcription by RNA polymerase II [GO:0045944]; regulation of histone phosphorylation [GO:0033127]; regulation of mRNA export from nucleus [GO:0010793…	K15978;	-0.0439366	0.0572311	0.00250395	0.225555	-0.0907765	-0.231349	-0.0225847	-0.325752	0.0892072	0.812045	0.989587	0.793005
AKT1_HUMAN	P31749	3	RAC-alpha serine/threonine-protein kinase (EC 2.7.11.1) (Protein kinase B) (PKB) (Protein kinase B alpha) (PKB alpha) (Proto-oncogene c-Akt) (RAC-PK-alpha)	AKT1 PKB RAC	activation-induced cell death of T cells [GO:0006924]; activation of protein kinase B activity [GO:0032148]; aging [GO:0007568]; anoikis [GO:0043276]; apoptotic mitochondrial changes [GO:0008637]; carbohydrate transport [GO:0008643]; cell differentiation [GO:0030154]; cell projection organization [GO:0030030]; cell proliferation [GO:0008283]; cellular protein modification process [GO:0006464]; ce…	K04456;	-0.128772	-0.101924	-0.213057	-0.483154	0.280965	0.133455	0.240564	0.260588	0.417362	0.00289242	0.977159	0.35131
AKTS1_HUMAN	Q96B36	3	Proline-rich AKT1 substrate 1 (40 kDa proline-rich AKT substrate)	AKT1S1 PRAS40	negative regulation of cell size [GO:0045792]; negative regulation of protein kinase activity [GO:0006469]; negative regulation of TOR signaling [GO:0032007]; neurotrophin TRK receptor signaling pathway [GO:0048011]; regulation of apoptotic process [GO:0042981]; regulation of cellular response to heat [GO:1900034]; regulation of neuron apoptotic process [GO:0043523]; TORC1 signaling [GO:0038202]	K16184;	0.310123	0.477655	0.0745562	0.0676145	-0.341206	-0.1626	-0.5002	-0.327698	-0.68325	9.49794e-06	0.694032	0.122758
AL1A3_HUMAN	P47895	11	Aldehyde dehydrogenase family 1 member A3 (EC 1.2.1.5) (Aldehyde dehydrogenase 6) (Retinaldehyde dehydrogenase 3) (RALDH-3) (RalDH3)	ALDH1A3 ALDH6	embryonic camera-type eye development [GO:0031076]; embryonic eye morphogenesis [GO:0048048]; face development [GO:0060324]; Harderian gland development [GO:0070384]; inner ear morphogenesis [GO:0042472]; locomotory behavior [GO:0007626]; neuromuscular process controlling balance [GO:0050885]; nucleus accumbens development [GO:0021768]; olfactory pit development [GO:0060166]; optic cup morphogene…	K00129;	0.0396526	0.0673997	-0.058672	-0.0396273	-0.086839	-0.0414088	-0.0796677	0.123878	-0.122667	0.198402	0.294687	0.870588
AL1B1_HUMAN	P30837	7	Aldehyde dehydrogenase X, mitochondrial (EC 1.2.1.3) (Aldehyde dehydrogenase 5) (Aldehyde dehydrogenase family 1 member B1)	ALDH1B1 ALDH5 ALDHX	carbohydrate metabolic process [GO:0005975]; ethanol catabolic process [GO:0006068]; ethanol oxidation [GO:0006069]	K00128;	0.157203	0.178822	0.210031	0.169155	-0.245602	-0.223752	-0.200213	-0.237693	-0.395121	1.24557e-06	0.988285	0.955182
AL3A2_HUMAN	P51648	4	Fatty aldehyde dehydrogenase (EC 1.2.1.3) (Aldehyde dehydrogenase 10) (Aldehyde dehydrogenase family 3 member A2) (Microsomal aldehyde dehydrogenase)	ALDH3A2 ALDH10 FALDH	cellular aldehyde metabolic process [GO:0006081]; central nervous system development [GO:0007417]; epidermis development [GO:0008544]; fatty acid alpha-oxidation [GO:0001561]; hexadecanal metabolic process [GO:0046458]; oxidation-reduction process [GO:0055114]; peripheral nervous system development [GO:0007422]; phytol metabolic process [GO:0033306]; sesquiterpenoid metabolic process [GO:0006714]…	K00128;	-0.2126	-0.300201	-0.296552	-0.244783	0.265548	0.228633	0.153596	0.199641	0.49013	0.00110558	0.968344	0.870588
AL4A1_HUMAN	P30038	6	Delta-1-pyrroline-5-carboxylate dehydrogenase, mitochondrial (P5C dehydrogenase) (EC 1.2.1.88) (Aldehyde dehydrogenase family 4 member A1) (L-glutamate gamma-semialdehyde dehydrogenase)	ALDH4A1 ALDH4 P5CDH	4-hydroxyproline catabolic process [GO:0019470]; glyoxylate metabolic process [GO:0046487]; proline catabolic process [GO:0006562]; proline catabolic process to glutamate [GO:0010133]; proline metabolic process [GO:0006560]	K00294;	-0.132248	-0.157881	-0.122953	-0.161751	0.12949	0.12074	0.146066	0.0802289	0.23528	0.00215282	0.938272	0.750245
AL7A1_HUMAN	P49419	19	Alpha-aminoadipic semialdehyde dehydrogenase (Alpha-AASA dehydrogenase) (EC 1.2.1.31) (Aldehyde dehydrogenase family 7 member A1) (EC 1.2.1.3) (Antiquitin-1) (Betaine aldehyde dehydrogenase) (EC 1.2.1.8) (Delta1-piperideine-6-carboxylate dehydrogenase) (P6c dehydrogenase)	ALDH7A1 ATQ1	cellular aldehyde metabolic process [GO:0006081]; choline catabolic process [GO:0042426]; glycine betaine biosynthetic process from choline [GO:0019285]; lysine catabolic process [GO:0006554]; sensory perception of sound [GO:0007605]	K14085;	-0.0564555	-0.205995	-0.1485	-0.119359	0.0304004	0.105701	0.120934	0.0180871	0.10782	0.126576	0.936547	0.761341
AL9A1_HUMAN	P49189	8	4-trimethylaminobutyraldehyde dehydrogenase (TMABADH) (EC 1.2.1.47) (Aldehyde dehydrogenase E3 isozyme) (Aldehyde dehydrogenase family 9 member A1) (EC 1.2.1.3) (Gamma-aminobutyraldehyde dehydrogenase) (EC 1.2.1.19) (R-aminobutyraldehyde dehydrogenase) [Cleaved into: 4-trimethylaminobutyraldehyde dehydrogenase, N-terminally processed]	ALDH9A1 ALDH4 ALDH7 ALDH9	carnitine biosynthetic process [GO:0045329]; cellular aldehyde metabolic process [GO:0006081]; hormone metabolic process [GO:0042445]; neurotransmitter biosynthetic process [GO:0042136]; oxidation-reduction process [GO:0055114]	K00149;	-0.0912004	-0.077435	-0.12101	-0.0948348	0.0691162	0.0936631	0.129101	0.00912875	0.176805	0.00586327	0.936547	0.804568
ALBU_HUMAN	P02768	4	Serum albumin	ALB GIG20 GIG42 PRO0903 PRO1708 PRO2044 PRO2619 PRO2675 UNQ696/PRO1341	cellular protein metabolic process [GO:0044267]; cellular response to starvation [GO:0009267]; hemolysis by symbiont of host erythrocytes [GO:0019836]; high-density lipoprotein particle remodeling [GO:0034375]; maintenance of mitochondrion location [GO:0051659]; negative regulation of apoptotic process [GO:0043066]; negative regulation of programmed cell death [GO:0043069]; platelet degranulation…	K16141;	0.0583396	0.181014	-0.254023	-0.414606	0.148835	-0.706886	-0.341597	-0.237535	0.189777	0.776057	0.981332	0.8244
ALDOA_HUMAN	P04075	22	Fructose-bisphosphate aldolase A (EC 4.1.2.13) (Lung cancer antigen NY-LU-1) (Muscle-type aldolase)	ALDOA ALDA	actin filament organization [GO:0007015]; ATP biosynthetic process [GO:0006754]; binding of sperm to zona pellucida [GO:0007339]; canonical glycolysis [GO:0061621]; fructose 1,6-bisphosphate metabolic process [GO:0030388]; fructose metabolic process [GO:0006000]; gluconeogenesis [GO:0006094]; glycolytic process [GO:0006096]; muscle cell cellular homeostasis [GO:0046716]; neutrophil degranulation …	K01623;	-0.0398744	-0.00830534	-0.0301575	-0.00996211	0.0411858	0.0485501	-0.0120756	0.047327	0.0652313	0.314839	0.936547	0.926899
ALDOC_HUMAN	P09972	9	Fructose-bisphosphate aldolase C (EC 4.1.2.13) (Brain-type aldolase)	ALDOC ALDC	canonical glycolysis [GO:0061621]; epithelial cell differentiation [GO:0030855]; fructose 1,6-bisphosphate metabolic process [GO:0030388]; fructose metabolic process [GO:0006000]; gluconeogenesis [GO:0006094]; neutrophil degranulation [GO:0043312]	K01623;	-2.04606	-2.26594	-1.73889	-1.9027	0.651445	0.609458	0.636462	0.658152	2.76117	5.471e-10	0.988285	0.604059
ALDR_HUMAN	P15121	9	Aldose reductase (AR) (EC 1.1.1.21) (Aldehyde reductase) (Aldo-keto reductase family 1 member B1)	AKR1B1 ALDR1	C21-steroid hormone biosynthetic process [GO:0006700]; carbohydrate metabolic process [GO:0005975]; cellular hyperosmotic salinity response [GO:0071475]; cellular response to methylglyoxal [GO:0097238]; cellular response to peptide [GO:1901653]; daunorubicin metabolic process [GO:0044597]; doxorubicin metabolic process [GO:0044598]; fructose biosynthetic process [GO:0046370]; inner medullary coll…	K00011;	0.369928	0.355061	0.324374	0.268574	-0.308128	-0.444615	-0.466294	-0.511171	-0.73762	1.06796e-07	0.858436	0.645874
ALG11_HUMAN	Q2TAA5	2	GDP-Man:Man(3)GlcNAc(2)-PP-Dol alpha-1,2-mannosyltransferase (EC 2.4.1.131) (Asparagine-linked glycosylation protein 11 homolog) (Glycolipid 2-alpha-mannosyltransferase)	ALG11 GT8	oligosaccharide-lipid intermediate biosynthetic process [GO:0006490]; protein glycosylation in endoplasmic reticulum [GO:0033577]	K03844;	0.311913	-0.0845367	-3.29724	-1.6387	1.10493	0.547297	-0.195345	-0.63019	0.364359	0.809897	0.934909	0.233401
AMOL2_HUMAN	Q9Y2J4	6	Angiomotin-like protein 2 (Leman coiled-coil protein) (LCCP)	AMOTL2 KIAA0989	hippo signaling [GO:0035329]; Wnt signaling pathway [GO:0016055]	K06104;	-0.0958136	0.0036094	0.053195	0.0225286	-0.0524072	-0.0243221	0.0476807	0.0724601	0.0445813	0.48531	0.849929	0.309321
AMPB_HUMAN	Q9H4A4	18	Aminopeptidase B (AP-B) (EC 3.4.11.6) (Arginine aminopeptidase) (Arginyl aminopeptidase)	RNPEP APB	negative regulation of blood pressure [GO:0045776]; peptide catabolic process [GO:0043171]; proteolysis [GO:0006508]	K01260;	0.00656657	0.0111293	-0.0281617	-0.0265185	-0.0305258	0.0173547	-0.0239569	-0.0669946	-0.0252593	0.598248	0.988285	0.896573
AMPL_HUMAN	P28838	18	Cytosol aminopeptidase (EC 3.4.11.1) (Leucine aminopeptidase 3) (LAP-3) (Leucyl aminopeptidase) (Peptidase S) (Proline aminopeptidase) (EC 3.4.11.5) (Prolyl aminopeptidase)	LAP3 LAPEP PEPS	proteolysis [GO:0006508]	K11142;	-0.075492	-0.0594855	-0.0357489	-0.0274777	0.0401264	0.0161948	0.0153159	0.0539597	0.12485	0.0481302	0.993272	0.854923
AMRP_HUMAN	P30533	6	Alpha-2-macroglobulin receptor-associated protein (Alpha-2-MRAP) (Low density lipoprotein receptor-related protein-associated protein 1) (RAP)	LRPAP1 A2MRAP	extracellular negative regulation of signal transduction [GO:1900116]; negative regulation of amyloid-beta clearance [GO:1900222]; negative regulation of cell death [GO:0060548]; negative regulation of protein binding [GO:0032091]; negative regulation of receptor internalization [GO:0002091]; negative regulation of very-low-density lipoprotein particle clearance [GO:0010916]; positive regulation …	K22290;	-0.0509373	0.0451519	-0.0188171	0.0960818	-0.0150082	-0.000794116	0.063902	0.0113084	0.0297182	0.714874	0.991176	0.51482
AN13A_HUMAN	Q8IZ07	6	Ankyrin repeat domain-containing protein 13A (Protein KE03)	ANKRD13A ANKRD13		K21437;	-0.0303117	-0.0549265	-0.155995	-0.099091	-0.106588	-0.0278857	0.0916626	0.148293	-0.031328	0.804568	0.936547	0.622517
AN32A_HUMAN	P39687	8	Acidic leucine-rich nuclear phosphoprotein 32 family member A (Acidic nuclear phosphoprotein pp32) (pp32) (Leucine-rich acidic nuclear protein) (LANP) (Mapmodulin) (Potent heat-stable protein phosphatase 2A inhibitor I1PP2A) (Putative HLA-DR-associated protein I) (PHAPI)	ANP32A C15orf1 LANP MAPM PHAP1	intracellular signal transduction [GO:0035556]; nucleocytoplasmic transport [GO:0006913]; regulation of apoptotic process [GO:0042981]; regulation of mRNA stability [GO:0043488]; regulation of transcription, DNA-templated [GO:0006355]; transcription, DNA-templated [GO:0006351]	K18646;	0.0971753	-0.075676	0.0436038	-0.0642369	0.0107135	0.0448585	0.0201015	0.044362	-0.0678384	0.313619	0.988285	0.404106
AN32B_HUMAN	Q92688	6	Acidic leucine-rich nuclear phosphoprotein 32 family member B (Acidic protein rich in leucines) (Putative HLA-DR-associated protein I-2) (PHAPI2) (Silver-stainable protein SSP29)	ANP32B APRIL PHAPI2	activation of cysteine-type endopeptidase activity involved in apoptotic process [GO:0006919]; histone exchange [GO:0043486]; inner ear development [GO:0048839]; negative regulation of cell differentiation [GO:0045596]; nucleosome assembly [GO:0006334]; positive regulation of protein export from nucleus [GO:0046827]; roof of mouth development [GO:0060021]; vasculature development [GO:0001944]; ve…	K18647;	0.101886	-0.110557	0.0436702	-0.055873	0.0518319	0.127385	0.0404141	-0.0212994	-0.0128827	0.910744	0.997926	0.498086
AN32E_HUMAN	Q9BTT0	3	Acidic leucine-rich nuclear phosphoprotein 32 family member E (LANP-like protein) (LANP-L)	ANP32E	histone exchange [GO:0043486]; nucleocytoplasmic transport [GO:0006913]; nucleosome assembly [GO:0006334]; regulation of apoptotic process [GO:0042981]	K18648;	-0.167434	-0.172784	-0.227069	-0.206436	0.166507	0.170472	0.0692712	0.212756	0.337923	0.000510849	0.915082	0.952634
ANAG_HUMAN	P54802	2	Alpha-N-acetylglucosaminidase (EC 3.2.1.50) (N-acetyl-alpha-glucosaminidase) (NAG) [Cleaved into: Alpha-N-acetylglucosaminidase 82 kDa form; Alpha-N-acetylglucosaminidase 77 kDa form]	NAGLU UFHSD1	cerebellar Purkinje cell layer development [GO:0021680]; glycosaminoglycan catabolic process [GO:0006027]; inner ear receptor cell development [GO:0060119]; locomotor rhythm [GO:0045475]; lysosome organization [GO:0007040]; middle ear morphogenesis [GO:0042474]; nervous system development [GO:0007399]; retinal rod cell development [GO:0046548]	K01205;	-1.62128	-1.91979	-0.838067	-1.03052	0.73188	0.406587	0.860759	0.447326	2.75801	0.000106891	0.863371	0.345847
ANCHR_HUMAN	Q96K21	2	Abscission/NoCut checkpoint regulator (ANCHR) (MLL partner containing FYVE domain) (Zinc finger FYVE domain-containing protein 19)	ZFYVE19 ANCHR MPFYVE	abscission [GO:0009838]; cell division [GO:0051301]; mitotic cytokinesis checkpoint [GO:0044878]; negative regulation of cytokinesis [GO:0032466]		-0.214792	-0.256362	-0.249453	-0.309485	0.158323	0.215876	0.299159	0.156276	0.391922	1.88902e-05	0.915082	0.705966
ANFY1_HUMAN	Q9P2R3	10	Rabankyrin-5 (Rank-5) (Ankyrin repeat and FYVE domain-containing protein 1) (Ankyrin repeats hooked to a zinc finger motif)	ANKFY1 ANKHZN KIAA1255	endocytosis [GO:0006897]; endosomal transport [GO:0016197]; endosomal vesicle fusion [GO:0034058]; Golgi to lysosome transport [GO:0090160]; positive regulation of pinocytosis [GO:0048549]; retrograde transport, endosome to Golgi [GO:0042147]	K20129;	-0.185465	-0.0761883	-0.175063	-0.0797242	0.141263	0.146058	0.0902536	0.113589	0.279021	0.00130735	0.978583	0.794648
ANKH1_HUMAN	Q8IWZ3	8	Ankyrin repeat and KH domain-containing protein 1 (HIV-1 Vpr-binding ankyrin repeat protein) (Multiple ankyrin repeats single KH domain) (hMASK)	ANKHD1 KIAA1085 MASK VBARP PP2500	innate immune response [GO:0045087]	K16726;	0.131155	0.081159	0.0867788	0.136675	-0.11252	-0.12004	-0.0874689	-0.0675992	-0.226842	0.00906604	0.988285	0.88401
ANLN_HUMAN	Q9NQW6	17	Anillin	ANLN	glomerular visceral epithelial cell migration [GO:0090521]; hematopoietic progenitor cell differentiation [GO:0002244]; mitotic cytokinesis [GO:0000281]; positive regulation of bleb assembly [GO:1904172]; regulation of exit from mitosis [GO:0007096]; septin ring assembly [GO:0000921]	K18621;	-0.110505	-0.0209627	0.00724281	0.0289058	0.00516356	-0.00474044	0.0360762	0.0408916	0.0943243	0.289672	0.993272	0.529417
ANM1_HUMAN	Q99873	13	Protein arginine N-methyltransferase 1 (EC 2.1.1.319) (Histone-arginine N-methyltransferase PRMT1) (Interferon receptor 1-bound protein 4)	PRMT1 HMT2 HRMT1L2 IR1B4	cell surface receptor signaling pathway [GO:0007166]; DNA damage response, signal transduction by p53 class mediator resulting in cell cycle arrest [GO:0006977]; histone H4-R3 methylation [GO:0043985]; histone methylation [GO:0016571]; in utero embryonic development [GO:0001701]; negative regulation of megakaryocyte differentiation [GO:0045653]; neuron projection development [GO:0031175]; peptidy…	K11434;	0.123746	0.114747	0.156129	0.153772	-0.147643	-0.151245	-0.196236	-0.147644	-0.27104	4.26264e-06	0.936547	0.7372
ANM5_HUMAN	O14744	13	Protein arginine N-methyltransferase 5 (EC 2.1.1.320) (72 kDa ICln-binding protein) (Histone-arginine N-methyltransferase PRMT5) (Jak-binding protein 1) (Shk1 kinase-binding protein 1 homolog) (SKB1 homolog) (SKB1Hs) [Cleaved into: Protein arginine N-methyltransferase 5, N-terminally processed]	PRMT5 HRMT1L5 IBP72 JBP1 SKB1	cell proliferation [GO:0008283]; circadian regulation of gene expression [GO:0032922]; DNA-templated transcription, termination [GO:0006353]; endothelial cell activation [GO:0042118]; Golgi ribbon formation [GO:0090161]; histone H4-R3 methylation [GO:0043985]; liver regeneration [GO:0097421]; negative regulation of cell differentiation [GO:0045596]; peptidyl-arginine methylation [GO:0018216]; pep…	K02516;	0.328673	0.193545	0.225368	0.209713	-0.408088	-0.365175	-0.408583	-0.3185	-0.695173	2.08266e-07	0.951188	0.755437
ANO6_HUMAN	Q4KMQ2	2	Anoctamin-6 (Small-conductance calcium-activated nonselective cation channel) (SCAN channel) (Transmembrane protein 16F)	ANO6 TMEM16F	activation of blood coagulation via clotting cascade [GO:0002543]; bleb assembly [GO:0032060]; blood coagulation [GO:0007596]; bone mineralization involved in bone maturation [GO:0035630]; calcium activated galactosylceramide scrambling [GO:0061591]; calcium activated phosphatidylcholine scrambling [GO:0061590]; calcium activated phosphatidylserine scrambling [GO:0061589]; calcium ion transmembra…	K19500;	-0.0133977	0.32932	-0.351376	-0.69882	0.660589	0.0667862	0.0176241	-0.00920643	0.630742	0.0949541	0.936547	0.30091
ANR28_HUMAN	O15084	2	Serine/threonine-protein phosphatase 6 regulatory ankyrin repeat subunit A (PP6-ARS-A) (Serine/threonine-protein phosphatase 6 regulatory subunit ARS-A) (Ankyrin repeat domain-containing protein 28) (Phosphatase interactor targeting protein hnRNP K) (PITK)	ANKRD28 KIAA0379	COPII vesicle coating [GO:0048208]	K15502;	0.0110771	0.108585	0.103279	0.0991085	-0.0386896	-0.0563239	-0.0894978	-0.0844543	-0.00110228	0.992995	0.982944	0.652096
ANX11_HUMAN	P50995	13	Annexin A11 (56 kDa autoantigen) (Annexin XI) (Annexin-11) (Calcyclin-associated annexin 50) (CAP-50)	ANXA11 ANX11	cytokinetic process [GO:0032506]; phagocytosis [GO:0006909]; response to calcium ion [GO:0051592]	K17095;	-0.141084	-0.205458	-0.178311	-0.215086	0.120756	0.169453	0.112428	0.108105	0.296059	0.00105933	0.997926	0.896573
ANXA1_HUMAN	P04083	22	Annexin A1 (Annexin I) (Annexin-1) (Calpactin II) (Calpactin-2) (Chromobindin-9) (Lipocortin I) (Phospholipase A2 inhibitory protein) (p35)	ANXA1 ANX1 LPC1	actin cytoskeleton reorganization [GO:0031532]; adaptive immune response [GO:0002250]; alpha-beta T cell differentiation [GO:0046632]; arachidonic acid secretion [GO:0050482]; cell surface receptor signaling pathway [GO:0007166]; cellular response to glucocorticoid stimulus [GO:0071385]; cellular response to hydrogen peroxide [GO:0070301]; cellular response to vascular endothelial growth factor s…	K17091;	-0.022762	-0.0365666	-0.0266803	-0.0330031	0.0466155	0.0322761	-0.00581313	0.0111555	0.0607005	0.0963422	0.989463	0.901416
ANXA2_HUMAN	P07355	28	Annexin A2 (Annexin II) (Annexin-2) (Calpactin I heavy chain) (Calpactin-1 heavy chain) (Chromobindin-8) (Lipocortin II) (Placental anticoagulant protein IV) (PAP-IV) (Protein I) (p36)	ANXA2 ANX2 ANX2L4 CAL1H LPC2D	angiogenesis [GO:0001525]; body fluid secretion [GO:0007589]; catabolism by host of symbiont protein [GO:0052362]; collagen fibril organization [GO:0030199]; fibrinolysis [GO:0042730]; interleukin-12-mediated signaling pathway [GO:0035722]; membrane raft assembly [GO:0001765]; negative regulation by host of symbiont molecular function [GO:0052405]; negative regulation of development of symbiont i…	K17092;	-0.0938937	-0.0876993	-0.0717354	-0.0655893	0.0565874	0.0709107	0.0558025	0.109018	0.16383	0.00158674	0.994175	0.822828
ANXA3_HUMAN	P12429	17	Annexin A3 (35-alpha calcimedin) (Annexin III) (Annexin-3) (Inositol 1,2-cyclic phosphate 2-phosphohydrolase) (Lipocortin III) (Placental anticoagulant protein III) (PAP-III)	ANXA3 ANX3	animal organ regeneration [GO:0031100]; defense response to bacterium [GO:0042742]; hippocampus development [GO:0021766]; neutrophil degranulation [GO:0043312]; phagocytosis [GO:0006909]; positive regulation of angiogenesis [GO:0045766]; positive regulation of DNA-binding transcription factor activity [GO:0051091]; positive regulation of DNA metabolic process [GO:0051054]; positive regulation of …	K17089;	0.119883	0.176827	0.0914104	0.121957	-0.0556221	-0.114359	-0.172513	-0.193176	-0.217791	0.00498998	0.935395	0.400657
ANXA4_HUMAN	P09525	18	Annexin A4 (35-beta calcimedin) (Annexin IV) (Annexin-4) (Carbohydrate-binding protein p33/p41) (Chromobindin-4) (Endonexin I) (Lipocortin IV) (P32.5) (PP4-X) (Placental anticoagulant protein II) (PAP-II) (Protein II)	ANXA4 ANX4	epithelial cell differentiation [GO:0030855]; negative regulation of apoptotic process [GO:0043066]; negative regulation of interleukin-8 secretion [GO:2000483]; negative regulation of NF-kappaB transcription factor activity [GO:0032088]; Notch signaling pathway [GO:0007219]; regulation of transcription by RNA polymerase II [GO:0006357]; signal transduction [GO:0007165]	K17093;	-0.526563	-0.543843	-0.440134	-0.354198	0.304821	0.343726	0.344972	0.379689	0.657762	0.000103423	0.936547	0.814674
ANXA5_HUMAN	P08758	23	Annexin A5 (Anchorin CII) (Annexin V) (Annexin-5) (Calphobindin I) (CBP-I) (Endonexin II) (Lipocortin V) (Placental anticoagulant protein 4) (PP4) (Placental anticoagulant protein I) (PAP-I) (Thromboplastin inhibitor) (Vascular anticoagulant-alpha) (VAC-alpha)	ANXA5 ANX5 ENX2 PP4	blood coagulation [GO:0007596]; negative regulation of apoptotic process [GO:0043066]; negative regulation of coagulation [GO:0050819]; platelet degranulation [GO:0002576]; response to organic substance [GO:0010033]; signal transduction [GO:0007165]	K16646;	-0.117785	-0.0781048	-0.159446	-0.165907	0.167548	0.174808	0.04203	0.117898	0.246385	0.0159265	0.936547	0.775901
ANXA6_HUMAN	P08133	8	Annexin A6 (67 kDa calelectrin) (Annexin VI) (Annexin-6) (Calphobindin-II) (CPB-II) (Chromobindin-20) (Lipocortin VI) (Protein III) (p68) (p70)	ANXA6 ANX6	apoptotic signaling pathway [GO:0097190]; calcium ion transport [GO:0006816]; ion transmembrane transport [GO:0034220]; mitochondrial calcium ion homeostasis [GO:0051560]; protein homooligomerization [GO:0051260]; regulation of muscle contraction [GO:0006937]	K17094;	0.377189	0.400646	0.356365	0.308294	-0.585665	-0.601214	-0.445431	-0.500248	-0.943664	7.09125e-07	0.988285	0.790481
ANXA7_HUMAN	P20073	10	Annexin A7 (Annexin VII) (Annexin-7) (Synexin)	ANXA7 ANX7 SNX OK/SW-cl.95	autophagy [GO:0006914]; cell proliferation [GO:0008283]; cellular calcium ion homeostasis [GO:0006874]; cellular water homeostasis [GO:0009992]; epithelial cell differentiation [GO:0030855]; hemostasis [GO:0007599]; membrane fusion [GO:0061025]; negative regulation of gene expression [GO:0010629]; regulation of cell shape [GO:0008360]; response to calcium ion [GO:0051592]; response to organic cyc…	K17095;	-0.0545642	-0.0252822	0.0180849	0.0675068	0.00988549	0.0150133	-0.012552	0.0270191	0.0229278	0.759063	0.982944	0.787613
ANXA9_HUMAN	O76027	8	Annexin A9 (Annexin XXXI) (Annexin-31) (Annexin-9) (Pemphaxin)	ANXA9 ANX31	cell-cell adhesion [GO:0098609]	K17090;	-0.413508	-0.412928	-0.310641	-0.377088	0.326812	0.331164	0.26631	0.242052	0.711832	5.52896e-09	0.908738	0.610447
AOFA_HUMAN	P21397	5	Amine oxidase [flavin-containing] A (EC 1.4.3.4) (Monoamine oxidase type A) (MAO-A)	MAOA	cellular biogenic amine metabolic process [GO:0006576]; cytokine-mediated signaling pathway [GO:0019221]; dopamine catabolic process [GO:0042420]; neurotransmitter catabolic process [GO:0042135]; neurotransmitter metabolic process [GO:0042133]	K00274;	0.304431	0.29848	0.221934	0.244333	-0.323239	-0.249604	-0.316874	-0.28229	-0.599745	3.2954e-07	0.993272	0.927772
AP1B1_HUMAN	Q10567	15	AP-1 complex subunit beta-1 (Adaptor protein complex AP-1 subunit beta-1) (Adaptor-related protein complex 1 subunit beta-1) (Beta-1-adaptin) (Beta-adaptin 1) (Clathrin assembly protein complex 1 beta large chain) (Golgi adaptor HA1/AP1 adaptin beta subunit)	AP1B1 ADTB1 BAM22 CLAPB2	antigen processing and presentation of exogenous peptide antigen via MHC class II [GO:0019886]; determination of left/right symmetry [GO:0007368]; heart development [GO:0007507]; intracellular protein transport [GO:0006886]; regulation of defense response to virus by virus [GO:0050690]; vesicle-mediated transport [GO:0016192]	K12392;	0.032654	-0.000779536	-0.0226504	-0.0588619	0.000593961	0.0354067	-0.0438174	0.0320936	-0.0136925	0.823416	0.981332	0.801769
AP1G1_HUMAN	O43747	11	AP-1 complex subunit gamma-1 (Adaptor protein complex AP-1 subunit gamma-1) (Adaptor-related protein complex 1 subunit gamma-1) (Clathrin assembly protein complex 1 gamma-1 large chain) (Gamma1-adaptin) (Golgi adaptor HA1/AP1 adaptin subunit gamma-1)	AP1G1 ADTG CLAPG1	antigen processing and presentation of exogenous peptide antigen via MHC class II [GO:0019886]; endosome to melanosome transport [GO:0035646]; Golgi to lysosome transport [GO:0090160]; intracellular protein transport [GO:0006886]; melanosome organization [GO:0032438]; positive regulation of natural killer cell degranulation [GO:0043323]; positive regulation of natural killer cell mediated cytotox…	K12391;	-0.062282	-0.18261	-0.0573268	0.0181296	0.00158339	0.0725144	0.0382149	0.0445205	0.0654794	0.379569	0.915082	0.658938
AP1G2_HUMAN	O75843	5	AP-1 complex subunit gamma-like 2 (Gamma2-adaptin) (G2ad)	AP1G2	intracellular protein transport [GO:0006886]; vesicle-mediated transport [GO:0016192]; viral process [GO:0016032]	K12391;	-0.165492	-0.199676	-0.0686316	-0.118524	0.0946177	0.184335	0.149497	0.0347572	0.219653	0.1602	0.986956	0.697691
AP1M1_HUMAN	Q9BXS5	11	AP-1 complex subunit mu-1 (AP-mu chain family member mu1A) (Adaptor protein complex AP-1 subunit mu-1) (Adaptor-related protein complex 1 subunit mu-1) (Clathrin assembly protein complex 1 mu-1 medium chain 1) (Clathrin coat assembly protein AP47) (Clathrin coat-associated protein AP47) (Golgi adaptor HA1/AP1 adaptin mu-1 subunit) (Mu-adaptin 1) (Mu1A-adaptin)	AP1M1 CLTNM	antigen processing and presentation of exogenous peptide antigen via MHC class II [GO:0019886]; endosome to melanosome transport [GO:0035646]; intracellular protein transport [GO:0006886]; melanosome organization [GO:0032438]; neutrophil degranulation [GO:0043312]; regulation of defense response to virus by virus [GO:0050690]	K12393;	-0.133834	-0.108922	-0.0942475	-0.0564426	0.101484	0.0408719	0.0976109	0.065664	0.177777	0.00738565	0.998719	0.976895
AP1M2_HUMAN	Q9Y6Q5	4	AP-1 complex subunit mu-2 (AP-mu chain family member mu1B) (Adaptor protein complex AP-1 subunit mu-2) (Adaptor-related protein complex 1 subunit mu-2) (Clathrin assembly protein complex 1 mu-2 medium chain 2) (Golgi adaptor HA1/AP1 adaptin mu-2 subunit) (Mu-adaptin 2) (Mu1B-adaptin)	AP1M2	antigen processing and presentation of exogenous peptide antigen via MHC class II [GO:0019886]; protein targeting [GO:0006605]; regulation of defense response to virus by virus [GO:0050690]; vesicle targeting [GO:0006903]	K12393;	0.105061	0.136569	0.122711	0.237042	-0.190576	-0.170629	-0.0829847	-0.197703	-0.297846	0.000650875	0.964	0.680477
AP1S1_HUMAN	P61966	3	AP-1 complex subunit sigma-1A (Adaptor protein complex AP-1 subunit sigma-1A) (Adaptor-related protein complex 1 subunit sigma-1A) (Clathrin assembly protein complex 1 sigma-1A small chain) (Clathrin coat assembly protein AP19) (Golgi adaptor HA1/AP1 adaptin sigma-1A subunit) (HA1 19 kDa subunit) (Sigma 1a subunit of AP-1 clathrin) (Sigma-adaptin 1A) (Sigma1A-adaptin)	AP1S1 AP19 CLAPS1	antigen processing and presentation of exogenous peptide antigen via MHC class II [GO:0019886]; intracellular protein transport [GO:0006886]; receptor-mediated endocytosis [GO:0006898]; regulation of defense response to virus by virus [GO:0050690]; response to virus [GO:0009615]; retrograde transport, endosome to Golgi [GO:0042147]	K12394;	-0.142284	-0.0659246	-0.110947	-0.0874703	0.122368	0.0804525	0.165101	-0.00301076	0.198105	0.0828548	0.85626	0.996576
AP2A1_HUMAN	O95782	24	AP-2 complex subunit alpha-1 (100 kDa coated vesicle protein A) (Adaptor protein complex AP-2 subunit alpha-1) (Adaptor-related protein complex 2 subunit alpha-1) (Alpha-adaptin A) (Alpha1-adaptin) (Clathrin assembly protein complex 2 alpha-A large chain) (Plasma membrane adaptor HA2/AP2 adaptin alpha A subunit)	AP2A1 ADTAA CLAPA1	antigen processing and presentation of exogenous peptide antigen via MHC class II [GO:0019886]; clathrin-dependent endocytosis [GO:0072583]; endocytosis [GO:0006897]; ephrin receptor signaling pathway [GO:0048013]; Golgi to endosome transport [GO:0006895]; intracellular protein transport [GO:0006886]; low-density lipoprotein particle clearance [GO:0034383]; low-density lipoprotein particle recept…	K11824;	-0.0212549	-0.10811	-0.103311	-0.0676061	0.0481256	0.0908847	0.0676026	0.0699801	0.0761111	0.184827	0.988285	0.94518
AP2A2_HUMAN	O94973	10	AP-2 complex subunit alpha-2 (100 kDa coated vesicle protein C) (Adaptor protein complex AP-2 subunit alpha-2) (Adaptor-related protein complex 2 subunit alpha-2) (Alpha-adaptin C) (Alpha2-adaptin) (Clathrin assembly protein complex 2 alpha-C large chain) (Huntingtin yeast partner J) (Huntingtin-interacting protein 9) (HIP-9) (Huntingtin-interacting protein J) (Plasma membrane adaptor HA2/AP2 ada…	AP2A2 ADTAB CLAPA2 HIP9 HYPJ KIAA0899	antigen processing and presentation of exogenous peptide antigen via MHC class II [GO:0019886]; clathrin-dependent endocytosis [GO:0072583]; ephrin receptor signaling pathway [GO:0048013]; intracellular protein transport [GO:0006886]; low-density lipoprotein particle clearance [GO:0034383]; low-density lipoprotein particle receptor catabolic process [GO:0032802]; membrane organization [GO:0061024…	K11824;	-0.204881	-0.19043	-0.15822	-0.094597	0.126558	0.105746	0.131032	0.0250187	0.288855	0.00129953	0.936376	0.859547
AP2B1_HUMAN	P63010	33	AP-2 complex subunit beta (AP105B) (Adaptor protein complex AP-2 subunit beta) (Adaptor-related protein complex 2 subunit beta) (Beta-2-adaptin) (Beta-adaptin) (Clathrin assembly protein complex 2 beta large chain) (Plasma membrane adaptor HA2/AP2 adaptin beta subunit)	AP2B1 ADTB2 CLAPB1	antigen processing and presentation of exogenous peptide antigen via MHC class II [GO:0019886]; aorta development [GO:0035904]; clathrin coat assembly [GO:0048268]; clathrin-dependent endocytosis [GO:0072583]; coronary vasculature development [GO:0060976]; ephrin receptor signaling pathway [GO:0048013]; intracellular protein transport [GO:0006886]; low-density lipoprotein particle clearance [GO:0…	K11825;	0.00988074	0.0305837	-0.023799	0.0136306	-0.0112687	0.0138843	-0.032635	0.00287358	-0.0273603	0.574611	0.997926	0.8244
AP2M1_HUMAN	Q96CW1	8	AP-2 complex subunit mu (AP-2 mu chain) (Adaptin-mu2) (Adaptor protein complex AP-2 subunit mu) (Adaptor-related protein complex 2 subunit mu) (Clathrin assembly protein complex 2 mu medium chain) (Clathrin coat assembly protein AP50) (Clathrin coat-associated protein AP50) (HA2 50 kDa subunit) (Plasma membrane adaptor AP-2 50 kDa protein)	AP2M1 CLAPM1 KIAA0109	antigen processing and presentation of exogenous peptide antigen via MHC class II [GO:0019886]; clathrin-dependent endocytosis [GO:0072583]; ephrin receptor signaling pathway [GO:0048013]; intracellular protein transport [GO:0006886]; low-density lipoprotein particle clearance [GO:0034383]; low-density lipoprotein particle receptor catabolic process [GO:0032802]; membrane organization [GO:0061024…	K11826;	-0.164387	-0.0834655	-0.0597212	-0.037901	0.0975794	0.116739	0.117444	0.0561234	0.240914	0.00840015	0.989587	0.677183
AP2S1_HUMAN	P53680	4	AP-2 complex subunit sigma (Adaptor protein complex AP-2 subunit sigma) (Adaptor-related protein complex 2 subunit sigma) (Clathrin assembly protein 2 sigma small chain) (Clathrin coat assembly protein AP17) (Clathrin coat-associated protein AP17) (HA2 17 kDa subunit) (Plasma membrane adaptor AP-2 17 kDa protein) (Sigma2-adaptin)	AP2S1 AP17 CLAPS2	antigen processing and presentation of exogenous peptide antigen via MHC class II [GO:0019886]; clathrin coat assembly [GO:0048268]; clathrin-dependent endocytosis [GO:0072583]; ephrin receptor signaling pathway [GO:0048013]; intracellular protein transport [GO:0006886]; low-density lipoprotein particle clearance [GO:0034383]; low-density lipoprotein particle receptor catabolic process [GO:003280…	K11827;	-0.157609	-0.230444	-0.0270555	0.0519672	0.0725947	0.0700318	0.0645965	0.0808399	0.213284	0.0225823	0.993272	0.398145
AP3B1_HUMAN	O00203	9	AP-3 complex subunit beta-1 (Adaptor protein complex AP-3 subunit beta-1) (Adaptor-related protein complex 3 subunit beta-1) (Beta-3A-adaptin) (Clathrin assembly protein complex 3 beta-1 large chain)	AP3B1 ADTB3A	anterograde axonal transport [GO:0008089]; anterograde synaptic vesicle transport [GO:0048490]; antigen processing and presentation, exogenous lipid antigen via MHC class Ib [GO:0048007]; blood coagulation [GO:0007596]; intracellular protein transport [GO:0006886]; melanosome organization [GO:0032438]; positive regulation of NK T cell differentiation [GO:0051138]; protein targeting to lysosome [G…	K12397;	-0.0580504	-0.00700081	-0.114802	-0.0221514	0.0319018	0.0505441	0.048335	0.0145157	0.0520135	0.472483	0.981332	0.85499
AP3D1_HUMAN	O14617	9	AP-3 complex subunit delta-1 (AP-3 complex subunit delta) (Adaptor-related protein complex 3 subunit delta-1) (Delta-adaptin)	AP3D1 PRO0039	anterograde axonal transport [GO:0008089]; anterograde synaptic vesicle transport [GO:0048490]; endosome to melanosome transport [GO:0035646]; eye pigment biosynthetic process [GO:0006726]; intracellular protein transport [GO:0006886]; melanosome organization [GO:0032438]; protein localization to membrane [GO:0072657]; regulation of sequestering of zinc ion [GO:0061088]	K12396;	-0.0427992	0.0928344	-0.0899053	-0.191181	0.0315553	0.104612	0.0592469	0.173685	0.0812492	0.23196	0.957264	0.122758
AP3M1_HUMAN	Q9Y2T2	6	AP-3 complex subunit mu-1 (AP-3 adaptor complex mu3A subunit) (Adaptor-related protein complex 3 subunit mu-1) (Mu-adaptin 3A) (Mu3A-adaptin)	AP3M1	anterograde axonal transport [GO:0008089]; anterograde synaptic vesicle transport [GO:0048490]; protein targeting to lysosome [GO:0006622]	K12398;	-0.0551183	-0.201967	0.0654856	0.00290388	0.0257043	0.0371598	0.0624083	-0.0093472	0.055599	0.626506	0.936547	0.65554
AP3S1_HUMAN	Q92572	4	AP-3 complex subunit sigma-1 (AP-3 complex subunit sigma-3A) (Adaptor-related protein complex 3 subunit sigma-1) (Clathrin-associated/assembly/adaptor protein, small 3) (Sigma-3A-adaptin) (Sigma3A-adaptin) (Sigma-adaptin 3a)	AP3S1 CLAPS3	anterograde axonal transport [GO:0008089]; anterograde synaptic vesicle transport [GO:0048490]; insulin receptor signaling pathway [GO:0008286]; intracellular protein transport [GO:0006886]	K12399;	0.0204868	-0.0762311	-0.0460554	-0.0730359	0.124803	0.0951265	0.0950163	0.118331	0.126754	0.136863	0.988285	0.686227
APAF_HUMAN	O14727	2	Apoptotic protease-activating factor 1 (APAF-1)	APAF1 KIAA0413	activation of cysteine-type endopeptidase activity involved in apoptotic process [GO:0006919]; activation of cysteine-type endopeptidase activity involved in apoptotic process by cytochrome c [GO:0008635]; aging [GO:0007568]; apoptotic process [GO:0006915]; cardiac muscle cell apoptotic process [GO:0010659]; cell differentiation [GO:0030154]; cellular response to transforming growth factor beta s…	K02084;	0.0337654	-0.412758	0.122995	0.173853	-0.248154	0.170987	0.0619817	0.0181321	-0.4554	0.0624797	0.85626	0.291973
APC1_HUMAN	Q9H1A4	2	Anaphase-promoting complex subunit 1 (APC1) (Cyclosome subunit 1) (Mitotic checkpoint regulator) (Testis-specific gene 24 protein)	ANAPC1 TSG24	anaphase-promoting complex-dependent catabolic process [GO:0031145]; cell cycle [GO:0007049]; cell division [GO:0051301]; protein K11-linked ubiquitination [GO:0070979]	K03348;	0.134097	0.00178219	0.0241819	-0.0832376	-0.0474826	0.0102112	0.0153969	0.0834325	-0.138484	0.258774	0.981332	0.651292
APC7_HUMAN	Q9UJX3	7	Anaphase-promoting complex subunit 7 (APC7) (Cyclosome subunit 7)	ANAPC7 APC7	anaphase-promoting complex-dependent catabolic process [GO:0031145]; cell cycle [GO:0007049]; cell division [GO:0051301]; protein K11-linked ubiquitination [GO:0070979]	K03354;	-0.0209229	-0.0343517	0.101575	0.0916539	-0.0849065	0.019848	0.0097002	0.0434047	-0.0465761	0.729262	0.944099	0.65554
APEX1_HUMAN	P27695	9	DNA-(apurinic or apyrimidinic site) lyase (EC 3.1.-.-) (EC 4.2.99.18) (APEX nuclease) (APEN) (Apurinic-apyrimidinic endonuclease 1) (AP endonuclease 1) (APE-1) (REF-1) (Redox factor-1) [Cleaved into: DNA-(apurinic or apyrimidinic site) lyase, mitochondrial]	APEX1 APE APE1 APEX APX HAP1 REF1	aging [GO:0007568]; base-excision repair [GO:0006284]; base-excision repair, base-free sugar-phosphate removal [GO:0006286]; cell redox homeostasis [GO:0045454]; cellular response to cAMP [GO:0071320]; cellular response to hydrogen peroxide [GO:0070301]; cellular response to peptide hormone stimulus [GO:0071375]; DNA demethylation [GO:0080111]; DNA recombination [GO:0006310]; DNA repair [GO:00062…	K10771;	-0.0538937	-0.0295931	-0.0258996	0.0144655	-0.00606697	0.00398082	0.00927178	-0.0072495	0.0434563	0.674344	0.999413	0.807761
API5_HUMAN	Q9BZZ5	14	Apoptosis inhibitor 5 (API-5) (Antiapoptosis clone 11 protein) (AAC-11) (Cell migration-inducing gene 8 protein) (Fibroblast growth factor 2-interacting factor) (FIF) (Protein XAGL)	API5 MIG8	apoptotic process [GO:0006915]; negative regulation of apoptotic process [GO:0043066]; negative regulation of fibroblast apoptotic process [GO:2000270]		-0.252859	-0.288651	-0.176288	-0.214115	0.185167	0.181877	0.207216	0.186378	0.414325	6.30623e-06	0.994175	0.608187
APLP2_HUMAN	Q06481	2	Amyloid-like protein 2 (APLP-2) (APPH) (Amyloid protein homolog) (CDEI box-binding protein) (CDEBP)	APLP2 APPL2	cellular protein metabolic process [GO:0044267]; G-protein coupled receptor signaling pathway [GO:0007186]; platelet degranulation [GO:0002576]; post-translational protein modification [GO:0043687]	K08117;	0.313746	-0.145037	-1.1092	-0.812587	0.23866	0.0205421	0.315096	0.372243	-0.753949	0.206342	0.96272	0.404106
APMAP_HUMAN	Q9HDC9	14	Adipocyte plasma membrane-associated protein (Protein BSCv)	APMAP C20orf3 UNQ1869/PRO4305	biosynthetic process [GO:0009058]	K21407;	-0.224093	-0.289091	-0.288292	-0.263127	0.228457	0.208459	0.199185	0.217733	0.457423	2.67322e-07	0.997926	0.901416
APOL2_HUMAN	Q9BQE5	6	Apolipoprotein L2 (Apolipoprotein L-II) (ApoL-II)	APOL2	acute-phase response [GO:0006953]; cholesterol metabolic process [GO:0008203]; lipid metabolic process [GO:0006629]; lipid transport [GO:0006869]; lipoprotein metabolic process [GO:0042157]; maternal process involved in female pregnancy [GO:0060135]; multicellular organism development [GO:0007275]	K14480;	0.0216175	0.03211	0.0398442	0.0583998	-0.0266737	-0.0650761	-0.00406863	-0.149132	-0.0667728	0.197137	0.897178	0.761341
APT_HUMAN	P07741	6	Adenine phosphoribosyltransferase (APRT) (EC 2.4.2.7)	APRT	adenine salvage [GO:0006168]; AMP salvage [GO:0044209]; cellular response to insulin stimulus [GO:0032869]; grooming behavior [GO:0007625]; lactation [GO:0007595]; neutrophil degranulation [GO:0043312]; purine-containing compound salvage [GO:0043101]; purine ribonucleoside salvage [GO:0006166]	K00759;	-0.00262779	0.0310725	0.0194843	-0.0437987	-0.0261241	-0.0384472	-0.0376188	-0.0634563	-0.00874257	0.911618	0.988285	0.932904
AQR_HUMAN	O60306	12	RNA helicase aquarius (EC 3.6.4.13) (Intron-binding protein of 160 kDa) (IBP160)	AQR KIAA0560	mRNA splicing, via spliceosome [GO:0000398]; transcription-coupled nucleotide-excision repair [GO:0006283]	K12874;	-0.0996453	-0.182036	-0.0737624	-0.0955287	0.0436363	0.108773	0.0803481	0.136462	0.153371	0.0204733	0.915082	0.780252
AR2BP_HUMAN	Q9Y2Y0	2	ADP-ribosylation factor-like protein 2-binding protein (ARF-like 2-binding protein) (ARL2-binding protein) (Binder of ARF2 protein 1)	ARL2BP BART BART1	maintenance of protein location in nucleus [GO:0051457]; positive regulation of tyrosine phosphorylation of STAT protein [GO:0042531]; regulation of insulin secretion [GO:0050796]; signal transduction [GO:0007165]	K16742;	0.198343	-0.238381	-0.0763963	-0.75354	0.261741	0.40242	-0.28405	0.148745	-0.051712	0.861763	0.85626	0.115937
AR6P4_HUMAN	Q66PJ3	2	ADP-ribosylation factor-like protein 6-interacting protein 4 (ARL-6-interacting protein 4) (Aip-4) (HSP-975) (HSVI-binding protein) (SR-15) (SRp25) (SR-25) (Splicing factor SRrp37)	ARL6IP4	mRNA processing [GO:0006397]; RNA splicing [GO:0008380]		0.0996236	-0.170859	0.094846	0.115951	-0.173214	-0.170429	-0.0752033	-0.0525993	-0.237254	0.0328437	0.92875	0.564108
ARAP1_HUMAN	Q96P48	6	Arf-GAP with Rho-GAP domain, ANK repeat and PH domain-containing protein 1 (Centaurin-delta-2) (Cnt-d2)	ARAP1 CENTD2 KIAA0782	actin filament reorganization involved in cell cycle [GO:0030037]; negative regulation of stress fiber assembly [GO:0051497]; positive regulation of epidermal growth factor receptor signaling pathway [GO:0045742]; positive regulation of filopodium assembly [GO:0051491]; positive regulation of GTPase activity [GO:0043547]; positive regulation of receptor recycling [GO:0001921]; regulation of cell …	K18439;	-0.00871363	0.133155	0.0606415	0.0127438	-0.111263	0.0372831	-0.0475777	-0.0027031	-0.0904508	0.276193	0.734107	0.33085
ARBK1_HUMAN	P25098	4	Beta-adrenergic receptor kinase 1 (Beta-ARK-1) (EC 2.7.11.15) (G-protein coupled receptor kinase 2)	GRK2 ADRBK1 BARK BARK1	cardiac muscle contraction [GO:0060048]; desensitization of G-protein coupled receptor protein signaling pathway [GO:0002029]; G-protein coupled acetylcholine receptor signaling pathway [GO:0007213]; G-protein coupled receptor signaling pathway [GO:0007186]; heart development [GO:0007507]; negative regulation of striated muscle contraction [GO:0045988]; negative regulation of the force of heart c…	K00910;	0.0107293	-0.267866	-0.0813321	-0.0252386	0.133426	0.0964236	0.133044	0.0866289	0.117029	0.313902	0.996825	0.651292
ARC1A_HUMAN	Q92747	7	Actin-related protein 2/3 complex subunit 1A (SOP2-like protein)	ARPC1A SOP2L	actin cytoskeleton organization [GO:0030036]; Arp2/3 complex-mediated actin nucleation [GO:0034314]; ephrin receptor signaling pathway [GO:0048013]; Fc-gamma receptor signaling pathway involved in phagocytosis [GO:0038096]; membrane organization [GO:0061024]	K05757;	-0.265858	-0.21995	-0.242026	-0.146499	0.202061	0.153722	0.12713	0.10739	0.412538	6.07296e-05	0.993272	0.77873
ARC1B_HUMAN	O15143	8	Actin-related protein 2/3 complex subunit 1B (Arp2/3 complex 41 kDa subunit) (p41-ARC)	ARPC1B ARC41	Arp2/3 complex-mediated actin nucleation [GO:0034314]; ephrin receptor signaling pathway [GO:0048013]; Fc-gamma receptor signaling pathway involved in phagocytosis [GO:0038096]; response to estradiol [GO:0032355]; response to estrogen [GO:0043627]	K05757;	0.0846753	0.0473082	0.0759588	0.127582	-0.0378636	-0.109794	-0.116384	-0.100524	-0.132432	0.0191251	0.988285	0.952843
ARF4_HUMAN	P18085	5	ADP-ribosylation factor 4	ARF4 ARF2	activation of phospholipase D activity [GO:0031584]; apical protein localization [GO:0045176]; brain development [GO:0007420]; cell migration [GO:0016477]; dendritic spine development [GO:0060996]; epidermal growth factor receptor signaling pathway [GO:0007173]; ER to Golgi vesicle-mediated transport [GO:0006888]; establishment or maintenance of epithelial cell apical/basal polarity [GO:0045197];…	K07939;	-0.0648373	-0.015635	-0.0413361	0.0316468	0.00483391	-0.0208839	0.0201859	0.0083208	0.073464	0.376289	0.998719	0.675697
ARF5_HUMAN	P84085	4	ADP-ribosylation factor 5	ARF5	protein transport [GO:0015031]; retrograde vesicle-mediated transport, Golgi to ER [GO:0006890]	K07940;	-0.212225	-0.301735	-0.23543	-0.0120576	0.185044	0.275207	0.160603	0.0983858	0.359435	0.000291203	0.96594	0.281188
ARF6_HUMAN	P62330	3	ADP-ribosylation factor 6	ARF6	cell adhesion [GO:0007155]; cell cycle [GO:0007049]; cell division [GO:0051301]; cortical actin cytoskeleton organization [GO:0030866]; endocytic recycling [GO:0032456]; establishment of epithelial cell polarity [GO:0090162]; hepatocyte apoptotic process [GO:0097284]; liver development [GO:0001889]; myeloid cell apoptotic process [GO:0033028]; negative regulation of dendrite development [GO:20001…	K07941;	-0.201203	-0.303923	-0.210509	-0.124335	0.0869222	0.147448	0.185684	0.139386	0.317659	0.00437199	0.988285	0.724424
ARFG1_HUMAN	Q8N6T3	6	ADP-ribosylation factor GTPase-activating protein 1 (ARF GAP 1) (ADP-ribosylation factor 1 GTPase-activating protein) (ARF1 GAP) (ARF1-directed GTPase-activating protein)	ARFGAP1 ARF1GAP	ER to Golgi vesicle-mediated transport [GO:0006888]; IRE1-mediated unfolded protein response [GO:0036498]; protein transport [GO:0015031]; regulation of endocytosis [GO:0030100]; retrograde vesicle-mediated transport, Golgi to ER [GO:0006890]	K12492;	0.234593	0.0797211	-0.0267668	-0.279737	0.0949603	0.0803076	-0.0124611	0.111781	-0.13622	0.376225	0.977159	0.194046
ARFG2_HUMAN	Q8N6H7	8	ADP-ribosylation factor GTPase-activating protein 2 (ARF GAP 2) (GTPase-activating protein ZNF289) (Zinc finger protein 289)	ARFGAP2 ZNF289 Nbla10535	ER to Golgi vesicle-mediated transport [GO:0006888]; protein transport [GO:0015031]; retrograde vesicle-mediated transport, Golgi to ER [GO:0006890]	K12493;	-0.0102787	0.0872506	0.0277912	-0.0327148	-0.0274497	-0.0461608	-0.0103678	-0.0874892	0.0180941	0.760954	0.964	0.56173
ARFG3_HUMAN	Q9NP61	5	ADP-ribosylation factor GTPase-activating protein 3 (ARF GAP 3)	ARFGAP3 ARFGAP1	ER to Golgi vesicle-mediated transport [GO:0006888]; intracellular protein transport [GO:0006886]; protein secretion [GO:0009306]; retrograde vesicle-mediated transport, Golgi to ER [GO:0006890]; vesicle-mediated transport [GO:0016192]	K12493;	-0.272354	-0.436742	-0.494588	-0.419262	0.264958	0.289795	0.274129	0.36578	0.57168	3.13324e-05	0.957264	0.59251
ARFP1_HUMAN	P53367	6	Arfaptin-1 (ADP-ribosylation factor-interacting protein 1)	ARFIP1	intracellular protein transport [GO:0006886]; regulation of Arp2/3 complex-mediated actin nucleation [GO:0034315]; regulation of protein secretion [GO:0050708]	K20314;	-0.131931	-0.20563	-0.0560175	-0.0536926	-0.0737672	0.0259175	-0.0342711	0.266896	0.0976525	0.424505	0.808593	0.445825
ARHG1_HUMAN	Q92888	6	Rho guanine nucleotide exchange factor 1 (115 kDa guanine nucleotide exchange factor) (p115-RhoGEF) (p115RhoGEF) (Sub1.5)	ARHGEF1	cell proliferation [GO:0008283]; G-protein coupled receptor signaling pathway [GO:0007186]; positive regulation of apoptotic process [GO:0043065]; regulation of Rho protein signal transduction [GO:0035023]; regulation of small GTPase mediated signal transduction [GO:0051056]; Rho protein signal transduction [GO:0007266]	K12330;	-0.320157	-0.155566	-0.0373681	-0.0489862	0.221021	0.0931963	0.231779	0.144007	0.452626	0.00193807	0.988285	0.683912
ARHG2_HUMAN	Q92974	6	Rho guanine nucleotide exchange factor 2 (Guanine nucleotide exchange factor H1) (GEF-H1) (Microtubule-regulated Rho-GEF) (Proliferating cell nucleolar antigen p40)	ARHGEF2 KIAA0651 LFP40	actin filament organization [GO:0007015]; asymmetric neuroblast division [GO:0055059]; cell morphogenesis [GO:0000902]; cellular hyperosmotic response [GO:0071474]; cellular response to muramyl dipeptide [GO:0071225]; cellular response to tumor necrosis factor [GO:0071356]; establishment of mitotic spindle orientation [GO:0000132]; G-protein coupled receptor signaling pathway [GO:0007186]; innate…	K12791;	0.0477538	0.0201324	0.0588295	0.00276373	-0.145543	-0.0864773	-0.170278	0.101664	-0.159385	0.191568	0.85626	0.940807
ARHG5_HUMAN	Q12774	2	Rho guanine nucleotide exchange factor 5 (Ephexin-3) (Guanine nucleotide regulatory protein TIM) (Oncogene TIM) (Transforming immortalized mammary oncogene) (p60 TIM)	ARHGEF5 TIM	actin cytoskeleton organization [GO:0030036]; G-protein coupled receptor signaling pathway [GO:0007186]; intracellular signal transduction [GO:0035556]; myeloid dendritic cell chemotaxis [GO:0002408]; positive regulation of apoptotic process [GO:0043065]; positive regulation of DNA-binding transcription factor activity [GO:0051091]; positive regulation of GTPase activity [GO:0043547]; positive re…	K20684;	-0.269875	0.0625894	-0.021737	-0.29182	-0.399976	-0.0240514	0.058952	0.425977	-0.0972324	0.77801	0.761667	0.978147
ARHG7_HUMAN	Q14155	4	Rho guanine nucleotide exchange factor 7 (Beta-Pix) (COOL-1) (PAK-interacting exchange factor beta) (p85)	ARHGEF7 COOL1 KIAA0142 P85SPR PAK3BP PIXB Nbla10314	ephrin receptor signaling pathway [GO:0048013]; focal adhesion assembly [GO:0048041]; Golgi organization [GO:0007030]; G-protein coupled receptor signaling pathway [GO:0007186]; hematopoietic progenitor cell differentiation [GO:0002244]; intracellular signal transduction [GO:0035556]; lamellipodium assembly [GO:0030032]; negative regulation of epidermal growth factor receptor signaling pathway [G…	K13710;	-0.0782682	-0.127034	-0.192008	-0.12082	0.101401	0.0931199	0.115935	0.0563157	0.206657	0.0125642	0.988285	0.847716
ARHGC_HUMAN	Q9NZN5	2	Rho guanine nucleotide exchange factor 12 (Leukemia-associated RhoGEF)	ARHGEF12 KIAA0382 LARG	G-protein coupled receptor signaling pathway [GO:0007186]; positive regulation of apoptotic process [GO:0043065]; regulation of Rho protein signal transduction [GO:0035023]; regulation of small GTPase mediated signal transduction [GO:0051056]; Rho protein signal transduction [GO:0007266]	K07532;	-0.140009	-0.341284	0.0552397	0.011203	-0.01317	0.0902495	0.0175955	0.295088	0.333619	0.24605	0.957264	0.690989
ARHGG_HUMAN	Q5VV41	11	Rho guanine nucleotide exchange factor 16 (Ephexin-4)	ARHGEF16 EPHEXIN4 NBR	activation of GTPase activity [GO:0090630]; cell chemotaxis [GO:0060326]; G-protein coupled receptor signaling pathway [GO:0007186]; positive regulation of apoptotic process [GO:0043065]; positive regulation of protein localization to plasma membrane [GO:1903078]; regulation of Rho protein signal transduction [GO:0035023]; regulation of small GTPase mediated signal transduction [GO:0051056]	K20688;	-0.153509	-0.143368	-0.111114	-0.0652884	0.109179	0.0759217	0.0990318	0.0947739	0.257456	0.000226363	0.997926	0.587419
ARHL2_HUMAN	Q9NX46	9	Poly(ADP-ribose) glycohydrolase ARH3 (EC 3.2.1.143) (ADP-ribosylhydrolase 3) ([Protein ADP-ribosylarginine] hydrolase-like protein 2)	ADPRHL2 ARH3	cellular response to superoxide [GO:0071451]	K11687;	-0.244267	-0.261674	-0.207316	-0.15888	0.224312	0.180267	0.182751	0.206724	0.461514	1.81979e-07	0.997926	0.558255
ARI1A_HUMAN	O14497	6	AT-rich interactive domain-containing protein 1A (ARID domain-containing protein 1A) (B120) (BRG1-associated factor 250) (BAF250) (BRG1-associated factor 250a) (BAF250A) (Osa homolog 1) (hOSA1) (SWI-like protein) (SWI/SNF complex protein p270) (SWI/SNF-related, matrix-associated, actin-dependent regulator of chromatin subfamily F member 1) (hELD)	ARID1A BAF250 BAF250A C1orf4 OSA1 SMARCF1	androgen receptor signaling pathway [GO:0030521]; ATP-dependent chromatin remodeling [GO:0043044]; cardiac chamber development [GO:0003205]; cardiac muscle cell differentiation [GO:0055007]; cellular response to calcium ion [GO:0071277]; chromatin-mediated maintenance of transcription [GO:0048096]; chromatin remodeling [GO:0006338]; embryo implantation [GO:0007566]; forebrain development [GO:0030…	K11653;	-0.0791355	-0.0547334	-0.0555196	-0.105405	0.0432681	0.170822	0.126463	0.0321822	0.159123	0.0936404	0.954578	0.975528
ARI2_HUMAN	O95376	2	E3 ubiquitin-protein ligase ARIH2 (ARI-2) (Protein ariadne-2 homolog) (EC 2.3.2.31) (RING-type E3 ubiquitin transferase ARIH2) (Triad1 protein)	ARIH2 ARI2 TRIAD1 HT005	developmental cell growth [GO:0048588]; hematopoietic stem cell proliferation [GO:0071425]; multicellular organism development [GO:0007275]; positive regulation of proteasomal ubiquitin-dependent protein catabolic process [GO:0032436]; positive regulation of protein targeting to mitochondrion [GO:1903955]; protein K48-linked ubiquitination [GO:0070936]; protein K63-linked ubiquitination [GO:00705…	K11969;	-0.0614993	0.200959	0.258768	0.292546	0.22092	-0.136418	-0.264558	-0.423615	0.101587	0.530983	0.694032	0.7602
ARK72_HUMAN	O43488	7	Aflatoxin B1 aldehyde reductase member 2 (EC 1.1.1.n11) (AFB1 aldehyde reductase 1) (AFB1-AR 1) (Aldoketoreductase 7) (Succinic semialdehyde reductase) (SSA reductase)	AKR7A2 AFAR AFAR1 AKR7	carbohydrate metabolic process [GO:0005975]; cellular aldehyde metabolic process [GO:0006081]; daunorubicin metabolic process [GO:0044597]; doxorubicin metabolic process [GO:0044598]; xenobiotic metabolic process [GO:0006805]	K15303;	-0.213095	-0.313253	-0.340845	-0.273459	0.27112	0.223408	0.265059	0.183389	0.525579	5.67011e-07	0.889228	0.855381
ARL1_HUMAN	P40616	7	ADP-ribosylation factor-like protein 1	ARL1	activation of phospholipase D activity [GO:0031584]; Golgi organization [GO:0007030]; Golgi vesicle transport [GO:0048193]; protein localization to Golgi apparatus [GO:0034067]; retrograde transport, endosome to Golgi [GO:0042147]; toxin metabolic process [GO:0009404]	K07942;	-0.288093	-0.364125	-0.256391	-0.210237	0.272278	0.195248	0.219661	0.219826	0.482231	4.11298e-05	0.998718	0.51846
ARL2_HUMAN	P36404	2	ADP-ribosylation factor-like protein 2	ARL2	bicellular tight junction assembly [GO:0070830]; centrosome cycle [GO:0007098]; maintenance of protein location in nucleus [GO:0051457]; negative regulation of GTPase activity [GO:0034260]; positive regulation of cell-substrate adhesion [GO:0010811]; positive regulation of microtubule polymerization [GO:0031116]; regulation of insulin secretion [GO:0050796]; regulation of microtubule polymerizati…	K07943;	0.15367	-0.00183194	0.17079	0.173892	-0.092018	-0.185588	-0.220045	-0.0935802	-0.228605	0.0423004	0.908738	0.529417
ARL3_HUMAN	P36405	2	ADP-ribosylation factor-like protein 3	ARL3 ARFL3	cilium assembly [GO:0060271]; intraciliary transport [GO:0042073]; kidney development [GO:0001822]; mitotic cytokinesis [GO:0000281]; photoreceptor cell development [GO:0042461]; post-Golgi vesicle-mediated transport [GO:0006892]; protein transport [GO:0015031]; small GTPase mediated signal transduction [GO:0007264]; smoothened signaling pathway [GO:0007224]	K07944;	-0.163499	-0.127021	-0.249625	-0.187446	0.171031	0.176838	0.21723	0.0187116	0.402845	0.000405316	0.858079	0.65554
ARL8A_HUMAN	Q96BM9	5	ADP-ribosylation factor-like protein 8A (ADP-ribosylation factor-like protein 10B) (Novel small G protein indispensable for equal chromosome segregation 2)	ARL8A ARL10B GIE2	cell cycle [GO:0007049]; cell division [GO:0051301]; chromosome segregation [GO:0007059]; neutrophil degranulation [GO:0043312]	K07955;	-0.511613	-0.679824	-0.61412	-0.462252	0.44439	0.324406	0.336494	0.50298	1.02024	3.92553e-07	0.863371	0.645874
ARL8B_HUMAN	Q9NVJ2	2	ADP-ribosylation factor-like protein 8B (ADP-ribosylation factor-like protein 10C) (Novel small G protein indispensable for equal chromosome segregation 1)	ARL8B ARL10C GIE1	cell cycle [GO:0007049]; cell division [GO:0051301]; chromosome segregation [GO:0007059]; lysosome localization [GO:0032418]	K07955;	-0.460375	-0.337233	-0.274557	-0.152842	0.264088	0.270467	0.270873	0.21154	0.692392	3.0636e-06	0.993272	0.51846
ARLY_HUMAN	P04424	7	Argininosuccinate lyase (ASAL) (EC 4.3.2.1) (Arginosuccinase)	ASL	arginine biosynthetic process via ornithine [GO:0042450]; urea cycle [GO:0000050]	K01755;	-0.0956351	-0.0725353	-0.0522794	-0.111246	0.0632954	0.0752047	0.0667275	0.0125805	0.155134	0.0655188	0.990919	0.787613
ARM10_HUMAN	Q8N2F6	3	Armadillo repeat-containing protein 10 (Splicing variant involved in hepatocarcinogenesis protein)	ARMC10 SVH PSEC0198	negative regulation of apoptotic process [GO:0043066]; negative regulation of intrinsic apoptotic signaling pathway by p53 class mediator [GO:1902254]; positive regulation of growth rate [GO:0040010]; regulation of growth [GO:0040008]		-0.219644	-0.427033	-0.187511	-0.275444	0.164194	0.321052	0.167449	0.158257	0.323609	0.0171678	0.936547	0.365683
ARMC1_HUMAN	Q9NVT9	2	Armadillo repeat-containing protein 1	ARMC1 ARCP	metal ion transport [GO:0030001]	K17306;	-0.0396022	0.0822526	-0.0499431	-0.0070889	0.119392	0.295745	-0.119088	0.129773	1.35576	0.167377	0.981332	0.820142
ARMC8_HUMAN	Q8IUR7	2	Armadillo repeat-containing protein 8	ARMC8 S863-2	neutrophil degranulation [GO:0043312]		-0.134557	-0.0118564	-0.0543088	-0.0693375	0.0791837	0.0734677	0.0925352	-0.0254103	0.207785	0.00769483	0.903019	0.682885
ARMT1_HUMAN	Q9H993	7	Protein-glutamate O-methyltransferase (EC 2.1.1.-) (Acidic residue methyltransferase 1)	ARMT1 C6orf211	cellular response to DNA damage stimulus [GO:0006974]; methylation [GO:0032259]; regulation of response to DNA damage stimulus [GO:2001020]		-0.0530639	-0.0419152	-0.150202	-0.0396703	0.0623975	0.0283917	0.0459438	0.0980085	0.129779	0.0354035	0.978908	0.810197
ARNT_HUMAN	P27540	3	Aryl hydrocarbon receptor nuclear translocator (ARNT protein) (Class E basic helix-loop-helix protein 2) (bHLHe2) (Dioxin receptor, nuclear translocator) (Hypoxia-inducible factor 1-beta) (HIF-1-beta) (HIF1-beta)	ARNT BHLHE2	cell differentiation [GO:0030154]; embryonic placenta development [GO:0001892]; mRNA transcription by RNA polymerase II [GO:0042789]; positive regulation of endothelial cell proliferation [GO:0001938]; positive regulation of erythrocyte differentiation [GO:0045648]; positive regulation of glycolytic process [GO:0045821]; positive regulation of hormone biosynthetic process [GO:0046886]; positive r…	K09097;	0.0631369	0.223099	-0.0947883	-0.0789044	-0.0804071	-0.0749153	-0.284263	0.200284	-0.14503	0.452944	0.694032	0.58566
ARP2_HUMAN	P61160	10	Actin-related protein 2 (Actin-like protein 2)	ACTR2 ARP2	Arp2/3 complex-mediated actin nucleation [GO:0034314]; associative learning [GO:0008306]; asymmetric cell division [GO:0008356]; cellular response to interferon-gamma [GO:0071346]; cellular response to trichostatin A [GO:0035984]; cilium assembly [GO:0060271]; cytosolic transport [GO:0016482]; ephrin receptor signaling pathway [GO:0048013]; establishment or maintenance of cell polarity [GO:000716…	K17260;	0.0514905	0.0432556	0.0238864	0.0598532	-0.0516928	-0.04626	-0.0587135	-0.0408308	-0.1112	0.0196427	0.997926	0.964612
ARP3_HUMAN	P61158	11	Actin-related protein 3 (Actin-like protein 3)	ACTR3 ARP3	actin polymerization-dependent cell motility [GO:0070358]; Arp2/3 complex-mediated actin nucleation [GO:0034314]; asymmetric cell division [GO:0008356]; cellular response to interferon-gamma [GO:0071346]; cilium assembly [GO:0060271]; ephrin receptor signaling pathway [GO:0048013]; establishment or maintenance of cell polarity [GO:0007163]; Fc-gamma receptor signaling pathway involved in phagocyt…	K18584;	0.00683861	0.0110508	0.0382002	-0.000811656	0.0162301	-0.0212533	-0.0429466	0.0133228	0.0166886	0.769881	0.957195	0.98268
ARP5L_HUMAN	Q9BPX5	4	Actin-related protein 2/3 complex subunit 5-like protein (Arp2/3 complex 16 kDa subunit 2) (ARC16-2)	ARPC5L	Arp2/3 complex-mediated actin nucleation [GO:0034314]; cell migration [GO:0016477]	K05754;	0.163305	0.151536	0.212941	0.154673	-0.195456	-0.196903	-0.197203	-0.0886312	-0.380389	0.0108178	0.957195	0.897816
ARPC2_HUMAN	O15144	16	Actin-related protein 2/3 complex subunit 2 (Arp2/3 complex 34 kDa subunit) (p34-ARC)	ARPC2 ARC34 PRO2446	actin filament polymerization [GO:0030041]; actin polymerization-dependent cell motility [GO:0070358]; Arp2/3 complex-mediated actin nucleation [GO:0034314]; ephrin receptor signaling pathway [GO:0048013]; Fc-gamma receptor signaling pathway involved in phagocytosis [GO:0038096]; membrane organization [GO:0061024]; positive regulation of lamellipodium assembly [GO:0010592]; positive regulation of…	K05758;	-0.00679351	-0.0366034	0.0186649	0.0267909	0.0200161	-0.0193821	-0.0651528	0.0509832	0.0160237	0.779187	0.808593	0.901416
ARPC3_HUMAN	O15145	8	Actin-related protein 2/3 complex subunit 3 (Arp2/3 complex 21 kDa subunit) (p21-ARC)	ARPC3 ARC21	actin polymerization-dependent cell motility [GO:0070358]; Arp2/3 complex-mediated actin nucleation [GO:0034314]; cellular response to nerve growth factor stimulus [GO:1990090]; ephrin receptor signaling pathway [GO:0048013]; Fc-gamma receptor signaling pathway involved in phagocytosis [GO:0038096]; membrane organization [GO:0061024]	K05756;	0.0128855	-0.012446	-0.0180076	0.0186252	-0.0118058	-0.0532062	-0.0406979	0.0110668	-0.0179582	0.754679	0.954578	0.916147
ARPC4_HUMAN	P59998	4	Actin-related protein 2/3 complex subunit 4 (Arp2/3 complex 20 kDa subunit) (p20-ARC)	ARPC4 ARC20	actin filament polymerization [GO:0030041]; actin nucleation [GO:0045010]; Arp2/3 complex-mediated actin nucleation [GO:0034314]; ephrin receptor signaling pathway [GO:0048013]; Fc-gamma receptor signaling pathway involved in phagocytosis [GO:0038096]; membrane organization [GO:0061024]	K05755;	-0.0137963	-0.0259297	0.0681361	0.103603	-0.0231221	-0.031862	-0.0638584	0.0477953	-0.0236501	0.780249	0.980064	0.768954
ARPC5_HUMAN	O15511	3	Actin-related protein 2/3 complex subunit 5 (Arp2/3 complex 16 kDa subunit) (p16-ARC)	ARPC5 ARC16	actin cytoskeleton organization [GO:0030036]; actin filament network formation [GO:0051639]; Arp2/3 complex-mediated actin nucleation [GO:0034314]; cell migration [GO:0016477]; ephrin receptor signaling pathway [GO:0048013]; Fc-gamma receptor signaling pathway involved in phagocytosis [GO:0038096]; lamellipodium organization [GO:0097581]; maintenance of cell polarity [GO:0030011]; membrane organi…	K05754;	-0.0512315	-0.014604	-0.0405229	-0.0358023	0.0385904	0.0247962	0.0448186	0.0426907	0.121173	0.11032	0.997631	0.979449
ARRB1_HUMAN	P49407	2	Beta-arrestin-1 (Arrestin beta-1) (Non-visual arrestin-2)	ARRB1 ARR1	activation of MAPK activity [GO:0000187]; follicle-stimulating hormone signaling pathway [GO:0042699]; G-protein coupled receptor internalization [GO:0002031]; G-protein coupled receptor signaling pathway [GO:0007186]; histone acetylation [GO:0016573]; membrane organization [GO:0061024]; negative regulation of ERK1 and ERK2 cascade [GO:0070373]; negative regulation of GTPase activity [GO:0034260]…	K04439;	0.208827	0.337591	0.052833	0.143843	-0.126003	-0.0662411	-0.157027	-0.277566	-0.512471	0.00744744	0.915082	0.658938
ARSA_HUMAN	P15289	5	Arylsulfatase A (ASA) (EC 3.1.6.8) (Cerebroside-sulfatase) [Cleaved into: Arylsulfatase A component B; Arylsulfatase A component C]	ARSA	glycosphingolipid metabolic process [GO:0006687]; neutrophil degranulation [GO:0043312]	K01134;	-1.0523	-0.852291	-0.794636	-0.837155	0.704163	0.517394	0.474114	0.354408	1.64332	7.0034e-08	0.913278	0.645874
ASAH1_HUMAN	Q13510	4	Acid ceramidase (AC) (ACDase) (Acid CDase) (EC 3.5.1.23) (Acylsphingosine deacylase) (N-acylsphingosine amidohydrolase) (Putative 32 kDa heart protein) (PHP32) [Cleaved into: Acid ceramidase subunit alpha; Acid ceramidase subunit beta]	ASAH1 ASAH HSD-33 HSD33	ceramide metabolic process [GO:0006672]; glycosphingolipid metabolic process [GO:0006687]; neutrophil degranulation [GO:0043312]	K12348;	-0.298954	-0.292665	-0.308644	-0.336466	0.316156	0.198362	0.168898	0.165254	0.537865	1.14276e-05	0.988285	0.73768
ASAP2_HUMAN	O43150	5	Arf-GAP with SH3 domain, ANK repeat and PH domain-containing protein 2 (Development and differentiation-enhancing factor 2) (Paxillin-associated protein with ARF GAP activity 3) (PAG3) (Pyk2 C-terminus-associated protein) (PAP)	ASAP2 DDEF2 KIAA0400		K12488;	-0.323954	-0.250973	-0.429445	-0.548996	0.296426	0.327638	0.369579	0.275441	0.643346	1.14097e-06	0.954578	0.262706
ASC_HUMAN	Q9ULZ3	5	Apoptosis-associated speck-like protein containing a CARD (hASC) (Caspase recruitment domain-containing protein 5) (PYD and CARD domain-containing protein) (Target of methylation-induced silencing 1)	PYCARD ASC CARD5 TMS1	activation of cysteine-type endopeptidase activity involved in apoptotic process [GO:0006919]; activation of innate immune response [GO:0002218]; apoptotic process [GO:0006915]; cellular response to interleukin-1 [GO:0071347]; cellular response to lipopolysaccharide [GO:0071222]; cellular response to tumor necrosis factor [GO:0071356]; defense response to Gram-negative bacterium [GO:0050829]; def…	K12799;	-0.017774	0.0128994	-0.0539234	-0.0524086	0.107808	0.0685494	0.00499747	-0.0779048	0.0544441	0.473189	0.858436	0.690989
ASCC2_HUMAN	Q9H1I8	2	Activating signal cointegrator 1 complex subunit 2 (ASC-1 complex subunit p100) (Trip4 complex subunit p100)	ASCC2 ASC1P100	DNA dealkylation involved in DNA repair [GO:0006307]; regulation of transcription, DNA-templated [GO:0006355]; transcription, DNA-templated [GO:0006351]	K18667;	0.0389522	0.0172108	0.0543503	-0.0391687	-0.0297542	-0.066595	-0.039007	0.0103336	-0.136216	0.265745	0.954578	0.718273
ASCC3_HUMAN	Q8N3C0	8	Activating signal cointegrator 1 complex subunit 3 (EC 3.6.4.12) (ASC-1 complex subunit p200) (ASC1p200) (Helicase, ATP binding 1) (Trip4 complex subunit p200)	ASCC3 HELIC1	cell proliferation [GO:0008283]; DNA dealkylation involved in DNA repair [GO:0006307]; DNA duplex unwinding [GO:0032508]; regulation of transcription, DNA-templated [GO:0006355]; transcription, DNA-templated [GO:0006351]	K18663;	-0.152189	-0.0151694	0.0680281	0.0174656	0.0678637	0.103902	0.00733394	0.00947319	0.165965	0.0721833	0.990919	0.434014
ASF1B_HUMAN	Q9NVP2	5	Histone chaperone ASF1B (Anti-silencing function protein 1 homolog B) (hAsf1) (hAsf1b) (CCG1-interacting factor A-II) (CIA-II) (hCIA-II)	ASF1B	cell differentiation [GO:0030154]; DNA replication-dependent nucleosome assembly [GO:0006335]; DNA replication-independent nucleosome assembly [GO:0006336]; multicellular organism development [GO:0007275]; regulation of transcription, DNA-templated [GO:0006355]; spermatogenesis [GO:0007283]; transcription, DNA-templated [GO:0006351]	K10753;	-0.0566608	0.0521547	0.0344515	0.147861	-0.0801039	-0.0743411	-0.0541738	0.0829382	-0.0406856	0.61378	0.85626	0.316648
ASGL1_HUMAN	Q7L266	2	Isoaspartyl peptidase/L-asparaginase (EC 3.4.19.5) (EC 3.5.1.1) (Asparaginase-like protein 1) (Beta-aspartyl-peptidase) (Isoaspartyl dipeptidase) (L-asparagine amidohydrolase) [Cleaved into: Isoaspartyl peptidase/L-asparaginase alpha chain; Isoaspartyl peptidase/L-asparaginase beta chain]	ASRGL1 ALP CRASH	asparagine catabolic process via L-aspartate [GO:0033345]; L-phenylalanine catabolic process [GO:0006559]	K13051;	-0.194343	-0.172857	0.197529	0.0726715	-0.0255826	0.162481	0.123434	0.0967154	-0.099399	0.734827	0.988285	0.304924
ASH2L_HUMAN	Q9UBL3	2	Set1/Ash2 histone methyltransferase complex subunit ASH2 (ASH2-like protein)	ASH2L ASH2L1	beta-catenin-TCF complex assembly [GO:1904837]; cellular response to DNA damage stimulus [GO:0006974]; hemopoiesis [GO:0030097]; histone H3-K4 methylation [GO:0051568]; positive regulation of cell proliferation [GO:0008284]; positive regulation of transcription by RNA polymerase II [GO:0045944]; regulation of megakaryocyte differentiation [GO:0045652]; regulation of transcription, DNA-templated […	K14964;	-0.229703	0.0160835	-0.0192172	0.119854	-0.142126	-0.17477	0.172627	0.309339	0.180049	0.514428	0.980064	0.726332
ASNA_HUMAN	O43681	11	ATPase ASNA1 (EC 3.6.-.-) (Arsenical pump-driving ATPase) (Arsenite-stimulated ATPase) (Transmembrane domain recognition complex 40 kDa ATPase subunit) (hARSA-I) (hASNA-I)	ASNA1 ARSA TRC40	IRE1-mediated unfolded protein response [GO:0036498]; tail-anchored membrane protein insertion into ER membrane [GO:0071816]	K01551;	0.000517355	0.0436135	-0.0189199	0.00844197	-0.0253246	-0.0413006	-0.0330822	0.0657725	-0.0142445	0.79741	0.85626	0.699548
ASNS_HUMAN	P08243	10	Asparagine synthetase [glutamine-hydrolyzing] (EC 6.3.5.4) (Cell cycle control protein TS11) (Glutamine-dependent asparagine synthetase)	ASNS TS11	asparagine biosynthetic process [GO:0006529]; cellular amino acid biosynthetic process [GO:0008652]; cellular response to glucose starvation [GO:0042149]; cellular response to hormone stimulus [GO:0032870]; glutamine metabolic process [GO:0006541]; L-asparagine biosynthetic process [GO:0070981]; liver development [GO:0001889]; negative regulation of apoptotic process [GO:0043066]; PERK-mediated u…	K01953;	0.618529	0.581246	0.457796	0.42427	-0.967077	-0.872065	-0.853563	-0.67456	-1.45381	3.41084e-09	0.92875	0.686478
ASPC1_HUMAN	Q9BZE9	2	Tether containing UBX domain for GLUT4 (Alveolar soft part sarcoma chromosomal region candidate gene 1 protein) (Alveolar soft part sarcoma locus) (Renal papillary cell carcinoma protein 17) (UBX domain-containing protein 9)	ASPSCR1 ASPL RCC17 TUG UBXD9 UBXN9	glucose homeostasis [GO:0042593]; intracellular protein transport [GO:0006886]; positive regulation of protein modification process [GO:0031401]; regulation of glucose import [GO:0046324]	K15627;	0.445551	0.416455	-0.0478438	-1.73933	-0.399455	-0.777512	0.268655	0.0789803	-0.843832	0.35652	0.957195	0.393611
ASPH_HUMAN	Q12797	8	Aspartyl/asparaginyl beta-hydroxylase (EC 1.14.11.16) (Aspartate beta-hydroxylase) (ASP beta-hydroxylase) (Peptide-aspartate beta-dioxygenase)	ASPH BAH	activation of cysteine-type endopeptidase activity [GO:0097202]; activation of store-operated calcium channel activity [GO:0032237]; calcium ion transmembrane transport [GO:0070588]; cellular response to calcium ion [GO:0071277]; detection of calcium ion [GO:0005513]; face morphogenesis [GO:0060325]; ion transmembrane transport [GO:0034220]; limb morphogenesis [GO:0035108]; muscle contraction [GO…	K00476;	-0.249057	-0.320173	-0.251051	-0.248626	0.186212	0.204585	0.191769	0.182225	0.425184	4.20816e-05	0.997631	0.323675
ASSY_HUMAN	P00966	4	Argininosuccinate synthase (EC 6.3.4.5) (Citrulline--aspartate ligase)	ASS1 ASS	acute-phase response [GO:0006953]; aging [GO:0007568]; arginine biosynthetic process [GO:0006526]; argininosuccinate metabolic process [GO:0000053]; aspartate metabolic process [GO:0006531]; cellular response to amine stimulus [GO:0071418]; cellular response to amino acid stimulus [GO:0071230]; cellular response to ammonium ion [GO:0071242]; cellular response to cAMP [GO:0071320]; cellular respon…	K01940;	-0.12324	-0.0805567	0.0285295	-0.22065	0.142824	0.0909358	0.154391	0.138427	0.28169	0.0703909	0.954578	0.793005
AT131_HUMAN	Q9HD20	4	Manganese-transporting ATPase 13A1 (EC 3.6.3.-)	ATP13A1 ATP13A KIAA1825 CGI-152	cellular calcium ion homeostasis [GO:0006874]; ion transmembrane transport [GO:0034220]	K14950;	-0.163378	-0.0990964	-0.0995502	-0.0255131	0.112776	0.0471921	0.0653182	0.152394	0.231543	0.0174979	0.957264	0.821165
AT1A1_HUMAN	P05023	31	Sodium/potassium-transporting ATPase subunit alpha-1 (Na(+)/K(+) ATPase alpha-1 subunit) (EC 3.6.3.9) (Sodium pump subunit alpha-1)	ATP1A1	cardiac muscle cell action potential involved in contraction [GO:0086002]; cell communication by electrical coupling involved in cardiac conduction [GO:0086064]; cellular potassium ion homeostasis [GO:0030007]; cellular response to mechanical stimulus [GO:0071260]; cellular response to steroid hormone stimulus [GO:0071383]; cellular sodium ion homeostasis [GO:0006883]; membrane hyperpolarization …	K01539;	-0.0440662	-0.0461937	-0.0872805	-0.0664193	0.0402588	0.0664897	0.0655834	-0.0122529	0.0964327	0.0288694	0.97757	0.932904
AT1B1_HUMAN	P05026	3	Sodium/potassium-transporting ATPase subunit beta-1 (Sodium/potassium-dependent ATPase subunit beta-1)	ATP1B1 ATP1B	ATP metabolic process [GO:0046034]; cardiac muscle contraction [GO:0060048]; cell adhesion [GO:0007155]; cell communication by electrical coupling involved in cardiac conduction [GO:0086064]; cellular calcium ion homeostasis [GO:0006874]; cellular potassium ion homeostasis [GO:0030007]; cellular sodium ion homeostasis [GO:0006883]; leukocyte migration [GO:0050900]; membrane repolarization [GO:008…	K01540;	-0.14076	-0.0380391	-0.110168	-0.028559	0.0678548	0.0760189	0.181442	-0.0027102	0.179738	0.068256	0.936547	0.88131
AT1B3_HUMAN	P54709	5	Sodium/potassium-transporting ATPase subunit beta-3 (Sodium/potassium-dependent ATPase subunit beta-3) (ATPB-3) (CD antigen CD298)	ATP1B3	cellular potassium ion homeostasis [GO:0030007]; cellular sodium ion homeostasis [GO:0006883]; leukocyte migration [GO:0050900]; membrane repolarization [GO:0086009]; positive regulation of ATPase activity [GO:0032781]; positive regulation of potassium ion import [GO:1903288]; positive regulation of potassium ion transmembrane transporter activity [GO:1901018]; positive regulation of sodium ion e…	K01540;	-0.0111882	0.0024928	-0.0158726	-0.00476459	0.0283205	-0.0151727	0.0710656	-0.0226153	0.000801763	0.992995	0.957264	0.959022
AT2A2_HUMAN	P16615	23	Sarcoplasmic/endoplasmic reticulum calcium ATPase 2 (SERCA2) (SR Ca(2+)-ATPase 2) (EC 3.6.3.8) (Calcium pump 2) (Calcium-transporting ATPase sarcoplasmic reticulum type, slow twitch skeletal muscle isoform) (Endoplasmic reticulum class 1/2 Ca(2+) ATPase)	ATP2A2 ATP2B	calcium ion import into sarcoplasmic reticulum [GO:1990036]; calcium ion transmembrane transport [GO:0070588]; calcium ion transport from cytosol to endoplasmic reticulum [GO:1903515]; cardiac muscle hypertrophy in response to stress [GO:0014898]; cell adhesion [GO:0007155]; cellular calcium ion homeostasis [GO:0006874]; cellular response to oxidative stress [GO:0034599]; endoplasmic reticulum ca…	K05853;	0.0204778	-0.0498741	-0.0185781	-0.0137649	0.0459099	-0.05407	0.020817	0.0507823	0.00233056	0.970233	0.997926	0.859856
AT2B1_HUMAN	P20020	15	Plasma membrane calcium-transporting ATPase 1 (PMCA1) (EC 3.6.3.8) (Plasma membrane calcium ATPase isoform 1) (Plasma membrane calcium pump isoform 1)	ATP2B1 PMCA1	aging [GO:0007568]; brain development [GO:0007420]; calcium ion export across plasma membrane [GO:1990034]; cellular response to corticosterone stimulus [GO:0071386]; cellular response to vitamin D [GO:0071305]; ion transmembrane transport [GO:0034220]; neural retina development [GO:0003407]; regulation of cardiac conduction [GO:1903779]; regulation of cytosolic calcium ion concentration [GO:0051…	K05850;	-0.00849338	-0.019785	0.0172859	-0.0175219	-0.0957533	0.0519636	0.0359428	-0.0232592	-0.0733998	0.290893	0.936547	0.698739
AT2B4_HUMAN	P23634	2	Plasma membrane calcium-transporting ATPase 4 (PMCA4) (EC 3.6.3.8) (Matrix-remodeling-associated protein 1) (Plasma membrane calcium ATPase isoform 4) (Plasma membrane calcium pump isoform 4)	ATP2B4 ATP2B2 MXRA1	calcium ion export [GO:1901660]; calcium ion import across plasma membrane [GO:0098703]; calcium ion transmembrane import into cytosol [GO:0097553]; calcium ion transmembrane transport [GO:0070588]; cellular calcium ion homeostasis [GO:0006874]; cellular response to epinephrine stimulus [GO:0071872]; flagellated sperm motility [GO:0030317]; hippocampus development [GO:0021766]; ion transmembrane …	K05850;	-0.696911	-0.763328	-0.120433	-0.176679	0.462637	0.458914	0.406286	0.271214	0.951725	3.74039e-05	0.92875	0.314771
AT2C1_HUMAN	P98194	3	Calcium-transporting ATPase type 2C member 1 (ATPase 2C1) (EC 3.6.3.8) (ATP-dependent Ca(2+) pump PMR1)	ATP2C1 KIAA1347 PMR1L HUSSY-28	actin cytoskeleton reorganization [GO:0031532]; ATP hydrolysis coupled cation transmembrane transport [GO:0099132]; calcium-dependent cell-cell adhesion via plasma membrane cell adhesion molecules [GO:0016339]; calcium ion transmembrane transport [GO:0070588]; calcium ion transport [GO:0006816]; cellular calcium ion homeostasis [GO:0006874]; cellular manganese ion homeostasis [GO:0030026]; epider…	K01537;	0.0272471	0.000857255	-0.0398053	-0.655858	0.199519	0.00756204	0.0177698	0.0471813	0.131344	0.191739	0.863371	0.244133
AT5F1_HUMAN	P24539	10	ATP synthase F(0) complex subunit B1, mitochondrial (ATP synthase proton-transporting mitochondrial F(0) complex subunit B1) (ATP synthase subunit b) (ATPase subunit b)	ATP5F1	ATP biosynthetic process [GO:0006754]; ATP hydrolysis coupled cation transmembrane transport [GO:0099132]; ATP synthesis coupled proton transport [GO:0015986]; cristae formation [GO:0042407]; mitochondrial ATP synthesis coupled proton transport [GO:0042776]; substantia nigra development [GO:0021762]	K02127;	0.175942	0.0380534	0.11316	0.084339	-0.10122	-0.0549251	-0.185079	0.0206869	-0.265216	0.0023417	0.980064	0.540553
ATAD2_HUMAN	Q6PL18	8	ATPase family AAA domain-containing protein 2 (EC 3.6.1.3) (AAA nuclear coregulator cancer-associated protein) (ANCCA)	ATAD2 L16 PRO2000	chromatin organization [GO:0006325]; negative regulation of chromatin silencing [GO:0031936]; positive regulation of transcription, DNA-templated [GO:0045893]; positive regulation of transcription by RNA polymerase II [GO:0045944]; regulation of transcription by RNA polymerase II [GO:0006357]; transcription, DNA-templated [GO:0006351]	K22531;	-0.527132	-0.390283	-0.405823	-0.327285	0.212611	0.35952	0.287581	0.369519	0.72915	1.48479e-08	0.801585	0.304924
ATD3A_HUMAN	Q9NVI7	20	ATPase family AAA domain-containing protein 3A	ATAD3A	mitochondrion organization [GO:0007005]; negative regulation of apoptotic process [GO:0043066]; regulation of cell growth [GO:0001558]	K17681;	0.145226	0.137198	0.127082	0.0646668	-0.119303	-0.156679	-0.131332	-0.101047	-0.269037	0.000112167	0.981332	0.437223
ATD3B_HUMAN	Q5T9A4	6	ATPase family AAA domain-containing protein 3B (AAA-TOB3)	ATAD3B KIAA1273 TOB3	mitochondrion organization [GO:0007005]; neutrophil degranulation [GO:0043312]	K17681;	0.247639	0.0912587	0.268266	0.222047	-0.263017	-0.297526	-0.427375	-0.323945	-0.509924	0.00956554	0.972904	0.58577
ATG3_HUMAN	Q9NT62	7	Ubiquitin-like-conjugating enzyme ATG3 (EC 2.3.2.-) (Autophagy-related protein 3) (APG3-like) (hApg3) (Protein PC3-96)	ATG3 APG3 APG3L	autophagosome assembly [GO:0000045]; autophagy of mitochondrion [GO:0000422]; autophagy of nucleus [GO:0044804]; cellular protein modification process [GO:0006464]; macroautophagy [GO:0016236]; mitochondrial fragmentation involved in apoptotic process [GO:0043653]; negative regulation of phagocytosis [GO:0050765]; protein targeting to membrane [GO:0006612]; protein ubiquitination [GO:0016567]; re…	K08343;	0.186604	0.173503	0.231283	0.21523	-0.22415	-0.237948	-0.26991	-0.174102	-0.380869	8.01607e-05	0.978583	0.764836
ATG7_HUMAN	O95352	6	Ubiquitin-like modifier-activating enzyme ATG7 (ATG12-activating enzyme E1 ATG7) (Autophagy-related protein 7) (APG7-like) (hAGP7) (Ubiquitin-activating enzyme E1-like protein)	ATG7 APG7L	aging [GO:0007568]; autophagosome assembly [GO:0000045]; autophagy [GO:0006914]; autophagy of host cells involved in interaction with symbiont [GO:0075044]; autophagy of mitochondrion [GO:0000422]; cellular protein modification process [GO:0006464]; cellular response to hyperoxia [GO:0071455]; cellular response to morphine [GO:0071315]; cellular response to nitrogen starvation [GO:0006995]; cellu…	K08337;	-0.263098	-0.181239	-0.321582	-0.275804	0.226367	0.245612	0.226383	0.305653	0.46716	2.9401e-05	0.936547	0.968884
ATLA3_HUMAN	Q6DD88	12	Atlastin-3 (EC 3.6.5.-)	ATL3	endoplasmic reticulum organization [GO:0007029]; Golgi organization [GO:0007030]; positive regulation of endoplasmic reticulum tubular network organization [GO:1903373]; protein homooligomerization [GO:0051260]	K17339;	-0.385888	-0.256982	-0.253863	-0.255888	0.207006	0.212766	0.210798	0.24386	0.533926	2.18086e-06	0.997926	0.755437
ATOX1_HUMAN	O00244	2	Copper transport protein ATOX1 (Metal transport protein ATX1)	ATOX1 HAH1	cellular copper ion homeostasis [GO:0006878]; copper ion transport [GO:0006825]; intracellular copper ion transport [GO:0015680]; response to oxidative stress [GO:0006979]	K07213;	0.212033	-0.71261	0.127454	0.321006	-0.089702	-0.509724	0.0146538	0.13023	-0.17138	0.286909	0.439093	0.0174926
ATP5H_HUMAN	O75947	9	ATP synthase subunit d, mitochondrial (ATPase subunit d)	ATP5H My032	ATP biosynthetic process [GO:0006754]; ATP hydrolysis coupled cation transmembrane transport [GO:0099132]; ATP synthesis coupled proton transport [GO:0015986]; cristae formation [GO:0042407]; mitochondrial ATP synthesis coupled proton transport [GO:0042776]	K02138;	0.0847572	0.097859	0.0662001	0.0154162	-0.0787586	-0.0974268	-0.112591	-0.105527	-0.144541	0.0060946	0.99334	0.75797
ATP5I_HUMAN	P56385	2	ATP synthase subunit e, mitochondrial (ATPase subunit e) (ATP synthase membrane subunit e) [Cleaved into: ATP synthase subunit e, mitochondrial, N-terminally processed]	ATP5ME ATP5I ATP5K	ATP biosynthetic process [GO:0006754]; cristae formation [GO:0042407]; mitochondrial ATP synthesis coupled proton transport [GO:0042776]	K02129;	0.131514	0.0180854	0.169043	0.028011	-0.186528	-0.081779	-0.0715295	-0.0710711	-0.329475	0.000605325	0.980064	0.645663
ATP5J_HUMAN	P18859	5	ATP synthase-coupling factor 6, mitochondrial (ATPase subunit F6)	ATP5J ATP5A ATPM	ATP biosynthetic process [GO:0006754]; cristae formation [GO:0042407]; mitochondrial ATP synthesis coupled proton transport [GO:0042776]; substantia nigra development [GO:0021762]	K02131;	0.0705522	0.0809292	0.0779623	0.082898	-0.12664	-0.0773763	-0.0214105	-0.11945	-0.196513	0.000164776	0.808593	0.997213
ATP5L_HUMAN	O75964	5	ATP synthase subunit g, mitochondrial (ATPase subunit g)	ATP5L	ATP biosynthetic process [GO:0006754]; ATP hydrolysis coupled cation transmembrane transport [GO:0099132]; ATP synthesis coupled proton transport [GO:0015986]; cristae formation [GO:0042407]; mitochondrial ATP synthesis coupled proton transport [GO:0042776]	K02140;	0.108604	0.079832	0.135262	0.0553818	-0.131541	-0.094312	-0.0145981	-0.095503	-0.252504	0.00522312	0.957264	0.901416
ATPA_HUMAN	P25705	28	ATP synthase subunit alpha, mitochondrial (ATP synthase F1 subunit alpha)	ATP5F1A ATP5A ATP5A1 ATP5AL2 ATPM	ATP biosynthetic process [GO:0006754]; cristae formation [GO:0042407]; lipid metabolic process [GO:0006629]; mitochondrial ATP synthesis coupled proton transport [GO:0042776]; negative regulation of endothelial cell proliferation [GO:0001937]; positive regulation of blood vessel endothelial cell migration [GO:0043536]	K02132;	0.0732482	0.0670978	0.0622328	0.0431904	-0.0967338	-0.0338272	-0.0629482	-0.0669357	-0.146352	0.00210702	0.981332	0.912886
ATPB_HUMAN	P06576	27	ATP synthase subunit beta, mitochondrial (EC 3.6.3.14) (ATP synthase F1 subunit beta)	ATP5F1B ATP5B ATPMB ATPSB	angiogenesis [GO:0001525]; ATP biosynthetic process [GO:0006754]; cristae formation [GO:0042407]; generation of precursor metabolites and energy [GO:0006091]; lipid metabolic process [GO:0006629]; mitochondrial ATP synthesis coupled proton transport [GO:0042776]; mitochondrion organization [GO:0007005]; negative regulation of cell adhesion involved in substrate-bound cell migration [GO:0006933]; …	K02133;	0.103643	0.0794551	0.0881237	0.0372822	-0.0950728	-0.0580861	-0.0964642	-0.0748633	-0.163172	0.00105432	0.994175	0.896573
ATPF2_HUMAN	Q8N5M1	3	ATP synthase mitochondrial F1 complex assembly factor 2 (ATP12 homolog)	ATPAF2 ATP12 LP3663	proton-transporting ATP synthase complex assembly [GO:0043461]	K07556;	0.351017	0.103539	0.247774	-0.166805	-0.449151	-0.162794	-0.356358	-0.254729	-0.828523	7.47547e-05	0.821387	0.309321
ATPG_HUMAN	P36542	5	ATP synthase subunit gamma, mitochondrial (ATP synthase F1 subunit gamma) (F-ATPase gamma subunit)	ATP5F1C ATP5C ATP5C1 ATP5CL1	ATP biosynthetic process [GO:0006754]; cristae formation [GO:0042407]; mitochondrial ATP synthesis coupled proton transport [GO:0042776]; oxidative phosphorylation [GO:0006119]	K02136;	0.11333	0.0564292	0.052153	0.0459555	-0.0570573	0.00212162	-0.0467143	-0.0860831	-0.158745	0.00182493	0.964348	0.673874
ATPK_HUMAN	P56134	2	ATP synthase subunit f, mitochondrial (ATP synthase membrane subunit f)	ATP5MF ATP5J2 ATP5JL	ATP biosynthetic process [GO:0006754]; cristae formation [GO:0042407]; mitochondrial ATP synthesis coupled proton transport [GO:0042776]; proton transmembrane transport [GO:1902600]	K02130;	-0.0632242	-0.0105707	0.00270614	-0.0496701	-0.0084492	0.035133	0.0506779	-0.00773565	0.0639138	0.32961	0.981332	0.94478
ATPO_HUMAN	P48047	8	ATP synthase subunit O, mitochondrial (ATP synthase peripheral stalk subunit OSCP) (Oligomycin sensitivity conferral protein) (OSCP)	ATP5PO ATP5O ATPO	ATP biosynthetic process [GO:0006754]; cristae formation [GO:0042407]; mitochondrial ATP synthesis coupled proton transport [GO:0042776]; proton transmembrane transport [GO:1902600]	K02137;	0.0525814	0.0362899	0.0859768	0.0214478	-0.0147348	-0.0689775	-0.0624892	-0.0438009	-0.10491	0.060649	0.997926	0.760995
ATRAP_HUMAN	Q6RW13	2	Type-1 angiotensin II receptor-associated protein (AT1 receptor-associated protein)	AGTRAP ATRAP	regulation of blood pressure [GO:0008217]; response to hypoxia [GO:0001666]		-0.232286	-0.26979	-0.228729	-0.137566	0.183492	0.261035	0.115854	0.245367	0.505449	0.000148613	0.981332	0.409459
ATRX_HUMAN	P46100	2	Transcriptional regulator ATRX (EC 3.6.4.12) (ATP-dependent helicase ATRX) (X-linked helicase II) (X-linked nuclear protein) (XNP) (Znf-HX)	ATRX RAD54L XH2	cellular response to hydroxyurea [GO:0072711]; chromatin remodeling [GO:0006338]; chromosome organization involved in meiotic cell cycle [GO:0070192]; DNA damage response, signal transduction by p53 class mediator [GO:0030330]; DNA methylation [GO:0006306]; DNA recombination [GO:0006310]; DNA repair [GO:0006281]; DNA replication-independent nucleosome assembly [GO:0006336]; forebrain development …	K10779;	-0.687507	-0.37709	0.128589	0.0500425	0.340371	0.206192	0.321151	-0.094618	1.23749	0.110025	0.988285	0.554616
ATX10_HUMAN	Q9UBB4	13	Ataxin-10 (Brain protein E46 homolog) (Spinocerebellar ataxia type 10 protein)	ATXN10 SCA10	cilium assembly [GO:0060271]; nervous system development [GO:0007399]; neuron projection development [GO:0031175]; protein homotrimerization [GO:0070207]	K19323;	0.185373	0.247541	0.224116	0.213063	-0.219003	-0.268274	-0.168357	-0.29785	-0.432106	2.6505e-06	0.869406	0.896573
ATX2_HUMAN	Q99700	7	Ataxin-2 (Spinocerebellar ataxia type 2 protein) (Trinucleotide repeat-containing gene 13 protein)	ATXN2 ATX2 SCA2 TNRC13	cytoplasmic mRNA processing body assembly [GO:0033962]; negative regulation of receptor internalization [GO:0002091]; regulation of cytoplasmic mRNA processing body assembly [GO:0010603]; regulation of translation [GO:0006417]; RNA metabolic process [GO:0016070]; RNA transport [GO:0050658]; stress granule assembly [GO:0034063]		0.0684267	0.172154	0.0598961	0.113747	-0.0615493	-0.112112	-0.0623725	-0.158395	-0.151688	0.0517176	0.988285	0.631772
ATX2L_HUMAN	Q8WWM7	10	Ataxin-2-like protein (Ataxin-2 domain protein) (Ataxin-2-related protein)	ATXN2L A2D A2LG A2LP A2RP	regulation of cytoplasmic mRNA processing body assembly [GO:0010603]; stress granule assembly [GO:0034063]		0.077473	0.0987795	0.164847	0.140056	-0.0876393	-0.144642	-0.133736	-0.0985109	-0.197813	0.00183757	0.988285	0.51482
ATX3_HUMAN	P54252	3	Ataxin-3 (EC 3.4.19.12) (Machado-Joseph disease protein 1) (Spinocerebellar ataxia type 3 protein)	ATXN3 ATX3 MJD MJD1 SCA3	actin cytoskeleton organization [GO:0030036]; cellular response to heat [GO:0034605]; cellular response to misfolded protein [GO:0071218]; chemical synaptic transmission [GO:0007268]; intermediate filament cytoskeleton organization [GO:0045104]; microtubule cytoskeleton organization [GO:0000226]; monoubiquitinated protein deubiquitination [GO:0035520]; nervous system development [GO:0007399]; nuc…	K11863;	-0.0184415	-0.156644	-0.26011	-0.490004	0.208304	0.250565	0.371577	0.208221	0.253456	0.162096	0.913278	0.417546
AURKA_HUMAN	O14965	3	Aurora kinase A (EC 2.7.11.1) (Aurora 2) (Aurora/IPL1-related kinase 1) (ARK-1) (Aurora-related kinase 1) (hARK1) (Breast tumor-amplified kinase) (Serine/threonine-protein kinase 15) (Serine/threonine-protein kinase 6) (Serine/threonine-protein kinase aurora-A)	AURKA AIK AIRK1 ARK1 AURA AYK1 BTAK IAK1 STK15 STK6	anaphase-promoting complex-dependent catabolic process [GO:0031145]; anterior/posterior axis specification [GO:0009948]; cell division [GO:0051301]; centrosome localization [GO:0051642]; DNA damage response, signal transduction by p53 class mediator resulting in cell cycle arrest [GO:0006977]; G2/M transition of mitotic cell cycle [GO:0000086]; liver regeneration [GO:0097421]; mitotic cell cycle …	K11481;	0.206749	0.253822	0.272104	0.485196	-0.531206	-0.393907	-0.410405	-0.295963	-0.711411	3.55181e-05	0.936547	0.304924
AURKB_HUMAN	Q96GD4	3	Aurora kinase B (EC 2.7.11.1) (Aurora 1) (Aurora- and IPL1-like midbody-associated protein 1) (AIM-1) (Aurora/IPL1-related kinase 2) (ARK-2) (Aurora-related kinase 2) (STK-1) (Serine/threonine-protein kinase 12) (Serine/threonine-protein kinase 5) (Serine/threonine-protein kinase aurora-B)	AURKB AIK2 AIM1 AIRK2 ARK2 STK1 STK12 STK5	abscission [GO:0009838]; aging [GO:0007568]; anaphase-promoting complex-dependent catabolic process [GO:0031145]; attachment of spindle microtubules to kinetochore [GO:0008608]; cell proliferation [GO:0008283]; cellular response to UV [GO:0034644]; cleavage furrow formation [GO:0036089]; histone H3-S28 phosphorylation [GO:0043988]; histone modification [GO:0016570]; mitotic cytokinesis checkpoint…	K11479;	-0.00824447	-0.155149	0.15389	0.36039	-0.203485	0.0371748	-0.0643707	0.101308	-0.240872	0.256298	0.921812	0.233401
AXA81_HUMAN	Q5VT79	15	Annexin A8-like protein 1	ANXA8L1 ANXA8L2		K17096;	-0.302852	-0.343823	-0.364468	-0.357078	0.238325	0.196531	0.251887	0.181277	0.502416	3.26438e-06	0.994175	0.978477
B2CL1_HUMAN	Q07817	2	Bcl-2-like protein 1 (Bcl2-L-1) (Apoptosis regulator Bcl-X)	BCL2L1 BCL2L BCLX	apoptotic mitochondrial changes [GO:0008637]; apoptotic process in bone marrow [GO:0071839]; cell proliferation [GO:0008283]; cellular process regulating host cell cycle in response to virus [GO:0060154]; cellular response to alkaloid [GO:0071312]; cellular response to amino acid stimulus [GO:0071230]; cellular response to gamma radiation [GO:0071480]; cytokine-mediated signaling pathway [GO:0019…	K04570;	1.87776e-05	0.0698775	-0.0541887	-0.0496066	0.0431797	-0.0173353	-0.0625592	0.161841	0.0918972	0.381485	0.85626	0.919281
B2L13_HUMAN	Q9BXK5	5	Bcl-2-like protein 13 (Bcl2-L-13) (Bcl-rambo) (Protein Mil1)	BCL2L13 MIL1 CD003	activation of cysteine-type endopeptidase activity involved in apoptotic process [GO:0006919]; apoptotic process [GO:0006915]	K15485;	0.0260745	-0.0766086	-0.0340817	-0.0537879	0.10188	0.0142943	0.0353369	-0.088713	0.124321	0.194433	0.863371	0.964612
B2MG_HUMAN	P61769	3	Beta-2-microglobulin [Cleaved into: Beta-2-microglobulin form pI 5.3]	B2M CDABP0092 HDCMA22P	antibacterial humoral response [GO:0019731]; antigen processing and presentation of endogenous peptide antigen via MHC class I [GO:0019885]; antigen processing and presentation of exogenous peptide antigen via MHC class I, TAP-dependent [GO:0002479]; antigen processing and presentation of exogenous peptide antigen via MHC class I, TAP-independent [GO:0002480]; antigen processing and presentation …	K08055;	-0.370881	-0.0736911	-0.264995	-0.33635	0.120785	0.104314	0.346808	0.120393	0.493555	0.014051	0.954578	0.529417
B4GT1_HUMAN	P15291	7	Beta-1,4-galactosyltransferase 1 (Beta-1,4-GalTase 1) (Beta4Gal-T1) (b4Gal-T1) (EC 2.4.1.-) (UDP-Gal:beta-GlcNAc beta-1,4-galactosyltransferase 1) (UDP-galactose:beta-N-acetylglucosamine beta-1,4-galactosyltransferase 1) [Cleaved into: Processed beta-1,4-galactosyltransferase 1] [Includes: Lactose synthase A protein (EC 2.4.1.22); N-acetyllactosamine synthase (EC 2.4.1.90) (Nal synthase); Beta-N-…	B4GALT1 GGTB2	acute inflammatory response [GO:0002526]; angiogenesis involved in wound healing [GO:0060055]; binding of sperm to zona pellucida [GO:0007339]; branching morphogenesis of an epithelial tube [GO:0048754]; cell adhesion [GO:0007155]; development of secondary sexual characteristics [GO:0045136]; epithelial cell development [GO:0002064]; extracellular matrix organization [GO:0030198]; galactose metab…	K07966;	-0.0291439	0.0198421	0.0582929	0.0112702	-0.124243	-0.0423682	-0.0113751	0.0117436	-0.0991281	0.215626	0.954578	0.868805
B4GT5_HUMAN	O43286	2	Beta-1,4-galactosyltransferase 5 (Beta-1,4-GalTase 5) (Beta4Gal-T5) (b4Gal-T5) (EC 2.4.1.-) (Beta-1,4-GalT II) (UDP-Gal:beta-GlcNAc beta-1,4-galactosyltransferase 5) (UDP-galactose:beta-N-acetylglucosamine beta-1,4-galactosyltransferase 5)	B4GALT5	keratan sulfate biosynthetic process [GO:0018146]; O-glycan processing [GO:0016266]; poly-N-acetyllactosamine biosynthetic process [GO:0030311]	K09905;	-0.01394	-0.0426552	-0.00455259	0.153297	0.00928278	0.0457876	-0.0430874	0.0127711	0.0182834	0.867326	0.991772	0.59251
BABA1_HUMAN	Q9NWV8	2	BRISC and BRCA1-A complex member 1 (Mediator of RAP80 interactions and targeting subunit of 40 kDa) (New component of the BRCA1-A complex)	BABAM1 C19orf62 MERIT40 NBA1 HSPC142	cell cycle [GO:0007049]; cell division [GO:0051301]; chromatin organization [GO:0006325]; double-strand break repair [GO:0006302]; double-strand break repair via nonhomologous end joining [GO:0006303]; positive regulation of DNA repair [GO:0045739]; protein deubiquitination [GO:0016579]; protein K63-linked deubiquitination [GO:0070536]; response to ionizing radiation [GO:0010212]; signal transduc…	K20776;	0.119782	0.175672	0.134636	0.188744	-0.198797	-0.209629	-0.171368	-0.122385	-0.311606	5.6428e-05	0.978908	0.662576
BABA2_HUMAN	Q9NXR7	2	BRISC and BRCA1-A complex member 2 (BRCA1-A complex subunit BRE) (BRCA1/BRCA2-containing complex subunit 45) (Brain and reproductive organ-expressed protein)	BABAM2 BRCC45 BRE	apoptotic process [GO:0006915]; cell cycle [GO:0007049]; cell division [GO:0051301]; cellular response to DNA damage stimulus [GO:0006974]; chromatin organization [GO:0006325]; double-strand break repair [GO:0006302]; double-strand break repair via nonhomologous end joining [GO:0006303]; negative regulation of apoptotic process [GO:0043066]; positive regulation of DNA repair [GO:0045739]; protein…	K12173;	-0.140032	-0.10795	-0.0943434	-0.00107476	0.0719697	0.0943821	0.211757	0.0448033	0.0461735	0.605729	0.841996	0.795414
BACH_HUMAN	O00154	12	Cytosolic acyl coenzyme A thioester hydrolase (EC 3.1.2.2) (Acyl-CoA thioesterase 7) (Brain acyl-CoA hydrolase) (BACH) (CTE-IIa) (CTE-II) (Long chain acyl-CoA thioester hydrolase)	ACOT7 BACH	acyl-CoA metabolic process [GO:0006637]; coenzyme A biosynthetic process [GO:0015937]; long-chain fatty-acyl-CoA catabolic process [GO:0036116]; medium-chain fatty acid biosynthetic process [GO:0051792]; medium-chain fatty-acyl-CoA catabolic process [GO:0036114]; palmitic acid biosynthetic process [GO:1900535]	K17360;	0.16939	0.175523	0.195166	0.192203	-0.15378	-0.229698	-0.177891	-0.194551	-0.32168	5.49102e-05	0.955135	0.956812
BAD_HUMAN	Q92934	3	Bcl2-associated agonist of cell death (BAD) (Bcl-2-binding component 6) (Bcl-2-like protein 8) (Bcl2-L-8) (Bcl-xL/Bcl-2-associated death promoter) (Bcl2 antagonist of cell death)	BAD BBC6 BCL2L8	activation of cysteine-type endopeptidase activity [GO:0097202]; activation of cysteine-type endopeptidase activity involved in apoptotic process [GO:0006919]; ADP metabolic process [GO:0046031]; apoptotic process [GO:0006915]; ATP metabolic process [GO:0046034]; cellular process regulating host cell cycle in response to virus [GO:0060154]; cellular response to chromate [GO:0071247]; cellular res…	K02158;	-0.140103	-0.0399589	-0.0952566	-0.0557837	0.10134	0.0910991	0.069899	0.132067	0.255719	0.00362731	0.998884	0.630059
BAF_HUMAN	O75531	7	Barrier-to-autointegration factor (Breakpoint cluster region protein 1) [Cleaved into: Barrier-to-autointegration factor, N-terminally processed]	BANF1 BAF BCRG1	establishment of integrated proviral latency [GO:0075713]; mitotic nuclear envelope reassembly [GO:0007084]; negative regulation of viral genome replication [GO:0045071]; nuclear transport [GO:0051169]; response to virus [GO:0009615]	K21870;	0.0322691	0.117696	-0.0884873	-0.00243818	0.0418951	-0.10366	0.0586412	0.0587631	-0.0321339	0.812045	0.753443	0.543642
BAG2_HUMAN	O95816	4	BAG family molecular chaperone regulator 2 (BAG-2) (Bcl-2-associated athanogene 2)	BAG2	negative regulation of protein binding [GO:0032091]; negative regulation of protein ubiquitination [GO:0031397]; negative regulation of ubiquitin protein ligase activity [GO:1904667]; positive regulation of proteasomal protein catabolic process [GO:1901800]; positive regulation of protein processing [GO:0010954]; protein folding [GO:0006457]; protein metabolic process [GO:0019538]; protein stabil…	K09556;	0.377036	0.436614	0.423429	0.430819	-0.573385	-0.525117	-0.725479	-0.619298	-0.958542	2.17731e-07	0.92875	0.873519
BAG3_HUMAN	O95817	7	BAG family molecular chaperone regulator 3 (BAG-3) (Bcl-2-associated athanogene 3) (Bcl-2-binding protein Bis) (Docking protein CAIR-1)	BAG3 BIS	brain development [GO:0007420]; cellular response to heat [GO:0034605]; cellular response to mechanical stimulus [GO:0071260]; extrinsic apoptotic signaling pathway in absence of ligand [GO:0097192]; extrinsic apoptotic signaling pathway via death domain receptors [GO:0008625]; negative regulation of apoptotic process [GO:0043066]; negative regulation of protein targeting to mitochondrion [GO:190…	K09557;	0.262373	0.243337	0.234301	0.205933	-0.274773	-0.388376	-0.268303	-0.241095	-0.571666	7.02656e-07	0.936547	0.804568
BAG4_HUMAN	O95429	2	BAG family molecular chaperone regulator 4 (BAG-4) (Bcl-2-associated athanogene 4) (Silencer of death domains)	BAG4 SODD	cellular response to epidermal growth factor stimulus [GO:0071364]; cellular response to tumor necrosis factor [GO:0071356]; negative regulation of apoptotic process [GO:0043066]; negative regulation of phosphatidylinositol-3,4,5-trisphosphate 5-phosphatase activity [GO:2001145]; negative regulation of protein targeting to mitochondrion [GO:1903215]; positive regulation of actin filament polymeri…	K09558;	0.164324	0.0801997	-0.0959433	-0.159282	-0.0959681	-0.000482685	-0.0858967	0.162108	-0.166165	0.204033	0.863371	0.590496
BAG5_HUMAN	Q9UL15	4	BAG family molecular chaperone regulator 5 (BAG-5) (Bcl-2-associated athanogene 5)	BAG5 KIAA0873	Golgi organization [GO:0007030]; negative regulation of neuron projection development [GO:0010977]; negative regulation of oxidative stress-induced intrinsic apoptotic signaling pathway [GO:1902176]; negative regulation of proteasomal ubiquitin-dependent protein catabolic process [GO:0032435]; negative regulation of protein refolding [GO:0061084]; negative regulation of protein ubiquitination [GO…	K09559;	-0.00163216	-0.11417	0.0725852	-0.0630736	-0.0733356	0.0130937	0.0252302	0.0646178	-0.125661	0.462522	0.970538	0.718273
BAG6_HUMAN	P46379	18	Large proline-rich protein BAG6 (BAG family molecular chaperone regulator 6) (BCL2-associated athanogene 6) (BAG-6) (HLA-B-associated transcript 3) (Protein G3) (Protein Scythe)	BAG6 BAT3 G3	apoptotic process [GO:0006915]; brain development [GO:0007420]; cell differentiation [GO:0030154]; chromatin organization [GO:0006325]; endoplasmic reticulum stress-induced pre-emptive quality control [GO:0061857]; ER-associated misfolded protein catabolic process [GO:0071712]; immune response-activating cell surface receptor signaling pathway [GO:0002429]; internal peptidyl-lysine acetylation [G…		0.0957918	0.163288	0.149264	0.105864	-0.158086	-0.157987	-0.0956144	-0.105376	-0.275487	3.57413e-05	0.976448	0.910305
BAIP2_HUMAN	Q9UQB8	14	Brain-specific angiogenesis inhibitor 1-associated protein 2 (BAI-associated protein 2) (BAI1-associated protein 2) (Protein BAP2) (Fas ligand-associated factor 3) (FLAF3) (Insulin receptor substrate p53/p58) (IRS-58) (IRSp53/58) (Insulin receptor substrate protein of 53 kDa) (IRSp53) (Insulin receptor substrate p53)	BAIAP2	actin crosslink formation [GO:0051764]; actin filament bundle assembly [GO:0051017]; axonogenesis [GO:0007409]; brain development [GO:0007420]; cellular response to epidermal growth factor stimulus [GO:0071364]; cellular response to L-glutamate [GO:1905232]; dendrite development [GO:0016358]; Fc-gamma receptor signaling pathway involved in phagocytosis [GO:0038096]; insulin receptor signaling pat…	K05627;	-0.0405369	-0.0094139	-0.0319446	-0.0186863	-0.0656344	-0.0342109	0.0766047	0.0247751	0.00461941	0.945519	0.937357	0.873891
BAP18_HUMAN	Q8IXM2	3	Chromatin complexes subunit BAP18 (BPTF-associated protein of 18 kDa)	BAP18 C17orf49	chromatin organization [GO:0006325]		-0.368274	-0.258295	-0.264672	-0.306378	0.287796	0.278814	0.244503	0.0983207	0.596963	2.67322e-07	0.734107	0.787613
BAP31_HUMAN	P51572	7	B-cell receptor-associated protein 31 (BCR-associated protein 31) (Bap31) (6C6-AG tumor-associated antigen) (Protein CDM) (p28)	BCAP31 BAP31 DXS1357E	antigen processing and presentation of peptide antigen via MHC class I [GO:0002474]; apoptotic process [GO:0006915]; calcium-mediated signaling using intracellular calcium source [GO:0035584]; ER to Golgi vesicle-mediated transport [GO:0006888]; intracellular protein transport [GO:0006886]; negative regulation of endoplasmic reticulum calcium ion concentration [GO:0032471]; positive regulation of…	K14009;	-0.0251624	-0.0923274	0.0469476	0.027594	0.132457	0.0108774	0.020323	0.0348991	0.0919653	0.225875	0.993272	0.556984
BASI_HUMAN	P35613	7	Basigin (5F7) (Collagenase stimulatory factor) (Extracellular matrix metalloproteinase inducer) (EMMPRIN) (Leukocyte activation antigen M6) (OK blood group antigen) (Tumor cell-derived collagenase stimulatory factor) (TCSF) (CD antigen CD147)	BSG UNQ6505/PRO21383	cell surface receptor signaling pathway [GO:0007166]; decidualization [GO:0046697]; embryo implantation [GO:0007566]; extracellular matrix disassembly [GO:0022617]; extracellular matrix organization [GO:0030198]; leukocyte migration [GO:0050900]; odontogenesis of dentin-containing tooth [GO:0042475]; protein localization to plasma membrane [GO:0072659]; pyruvate metabolic process [GO:0006090]; re…	K06535;	0.0475505	0.0317163	0.0693625	0.0587706	-0.0234564	-0.0239041	-0.0701747	-0.012953	-0.0646249	0.197443	0.988285	0.893478
BASP1_HUMAN	P80723	9	Brain acid soluble protein 1 (22 kDa neuronal tissue-enriched acidic protein) (Neuronal axonal membrane protein NAP-22)	BASP1 NAP22	diaphragm development [GO:0060539]; glomerular visceral epithelial cell differentiation [GO:0072112]; gonad development [GO:0008406]; mesenchymal to epithelial transition [GO:0060231]; metanephric mesenchyme development [GO:0072075]; negative regulation of transcription, DNA-templated [GO:0045892]; positive regulation of heart growth [GO:0060421]; positive regulation of metanephric ureteric bud d…	K17272;	-1.22202	-1.35991	-1.27293	-1.10931	0.607815	0.681538	0.62372	0.603987	1.74627	9.78737e-08	0.970538	0.7602
BAX_HUMAN	Q07812	8	Apoptosis regulator BAX (Bcl-2-like protein 4) (Bcl2-L-4)	BAX BCL2L4	activation of cysteine-type endopeptidase activity involved in apoptotic process [GO:0006919]; activation of cysteine-type endopeptidase activity involved in apoptotic process by cytochrome c [GO:0008635]; activation of cysteine-type endopeptidase activity involved in apoptotic signaling pathway [GO:0097296]; apoptotic mitochondrial changes [GO:0008637]; apoptotic process [GO:0006915]; apoptotic …	K02159;	-0.345453	-0.26824	-0.31768	-0.317084	0.310083	0.228311	0.336267	0.193495	0.610521	5.5886e-08	0.936547	0.855086
BAZ1B_HUMAN	Q9UIG0	4	Tyrosine-protein kinase BAZ1B (EC 2.7.10.2) (Bromodomain adjacent to zinc finger domain protein 1B) (Williams syndrome transcription factor) (Williams-Beuren syndrome chromosomal region 10 protein) (Williams-Beuren syndrome chromosomal region 9 protein) (hWALp2)	BAZ1B WBSC10 WBSCR10 WBSCR9 WSTF	cellular response to DNA damage stimulus [GO:0006974]; chromatin assembly or disassembly [GO:0006333]; chromatin remodeling [GO:0006338]; histone phosphorylation [GO:0016572]; positive regulation of gene expression, epigenetic [GO:0045815]; regulation of transcription by RNA polymerase II [GO:0006357]; transcription, DNA-templated [GO:0006351]	K11658;	-0.118665	-0.234495	-0.0243048	-0.164523	0.0605901	0.120016	0.132179	0.201966	0.0859068	0.494028	0.936547	0.434014
BCAM_HUMAN	P50895	10	Basal cell adhesion molecule (Auberger B antigen) (B-CAM cell surface glycoprotein) (F8/G253 antigen) (Lutheran antigen) (Lutheran blood group glycoprotein) (CD antigen CD239)	BCAM LU MSK19	cell adhesion [GO:0007155]; cell-matrix adhesion [GO:0007160]; signal transduction [GO:0007165]	K06578;	-0.434855	-0.45249	-0.524211	-0.483237	0.400106	0.335642	0.435668	0.260971	0.807095	1.19553e-08	0.913278	0.802761
BCAR1_HUMAN	P56945	4	Breast cancer anti-estrogen resistance protein 1 (CRK-associated substrate) (Cas scaffolding protein family member 1) (p130cas)	BCAR1 CAS CASS1 CRKAS	actin filament organization [GO:0007015]; antigen receptor-mediated signaling pathway [GO:0050851]; B cell receptor signaling pathway [GO:0050853]; cell adhesion [GO:0007155]; cell chemotaxis [GO:0060326]; cell division [GO:0051301]; cell migration [GO:0016477]; cell proliferation [GO:0008283]; cellular response to hepatocyte growth factor stimulus [GO:0035729]; epidermal growth factor receptor s…	K05726;	0.0496558	0.209926	0.220266	0.459763	-0.425971	-0.49509	-0.403103	-0.274941	-0.543885	0.0138332	0.981332	0.414407
BCAT1_HUMAN	P54687	3	Branched-chain-amino-acid aminotransferase, cytosolic (BCAT(c)) (EC 2.6.1.42) (Protein ECA39)	BCAT1 BCT1 ECA39	branched-chain amino acid biosynthetic process [GO:0009082]; branched-chain amino acid catabolic process [GO:0009083]; cell proliferation [GO:0008283]; G1/S transition of mitotic cell cycle [GO:0000082]; leucine biosynthetic process [GO:0009098]; valine biosynthetic process [GO:0009099]	K00826;	-0.302473	-0.140107	-0.247314	-0.243079	0.187345	0.126962	0.252697	0.0651276	0.457022	0.000167725	0.85626	0.673874
BCAT2_HUMAN	O15382	9	Branched-chain-amino-acid aminotransferase, mitochondrial (BCAT(m)) (EC 2.6.1.42) (Placental protein 18) (PP18)	BCAT2 BCATM BCT2 ECA40	branched-chain amino acid biosynthetic process [GO:0009082]; branched-chain amino acid catabolic process [GO:0009083]; cellular response to leukemia inhibitory factor [GO:1990830]; isoleucine catabolic process [GO:0006550]; leucine biosynthetic process [GO:0009098]; regulation of hormone levels [GO:0010817]; valine biosynthetic process [GO:0009099]	K00826;	-0.183402	-0.257567	-0.243191	-0.271262	0.171978	0.250214	0.18607	0.146807	0.331913	0.000203078	0.982944	0.718273
BCCIP_HUMAN	Q9P287	4	BRCA2 and CDKN1A-interacting protein (P21- and CDK-associated protein 1) (Protein TOK-1)	BCCIP TOK1	DNA repair [GO:0006281]; establishment of mitotic spindle orientation [GO:0000132]; microtubule anchoring [GO:0034453]; microtubule cytoskeleton organization [GO:0000226]; mitotic spindle assembly [GO:0090307]; mitotic spindle organization [GO:0007052]; neuroendocrine cell differentiation [GO:0061101]; regulation of cyclin-dependent protein serine/threonine kinase activity [GO:0000079]	K15262;	0.126865	0.211496	0.111839	0.156538	-0.135482	-0.194262	-0.197128	-0.169354	-0.28029	0.000362325	0.979754	0.587419
BCLF1_HUMAN	Q9NYF8	12	Bcl-2-associated transcription factor 1 (Btf) (BCLAF1 and THRAP3 family member 1)	BCLAF1 BTF KIAA0164	apoptotic process [GO:0006915]; cellular response to leukemia inhibitory factor [GO:1990830]; negative regulation of transcription, DNA-templated [GO:0045892]; positive regulation of apoptotic process [GO:0043065]; positive regulation of DNA-templated transcription, initiation [GO:2000144]; positive regulation of intrinsic apoptotic signaling pathway [GO:2001244]; positive regulation of response …	K13087;	0.0212259	0.0865732	0.0475117	0.0252667	-0.122337	-0.0647067	-0.0255037	-0.0148665	-0.12501	0.0365847	0.864096	0.675697
BD1L1_HUMAN	Q8NFC6	4	Biorientation of chromosomes in cell division protein 1-like 1	BOD1L1 BOD1L FAM44A KIAA1327	cellular response to DNA damage stimulus [GO:0006974]; DNA repair [GO:0006281]; replication fork processing [GO:0031297]		-0.103367	-0.0801875	-0.0792839	-0.0191032	0.00804257	0.131835	-0.0209444	0.117307	0.0473108	0.750103	0.913278	0.864836
BDH_HUMAN	Q02338	3	D-beta-hydroxybutyrate dehydrogenase, mitochondrial (EC 1.1.1.30) (3-hydroxybutyrate dehydrogenase) (BDH) (Short chain dehydrogenase/reductase family 9C member 1)	BDH1 BDH SDR9C1	ketone body biosynthetic process [GO:0046951]; ketone body catabolic process [GO:0046952]	K00019;	0.13407	0.119452	-0.0494147	-0.0119465	0.183062	0.133619	0.119844	0.112579	0.0672183	0.586658	0.994175	0.590496
BGAL_HUMAN	P16278	12	Beta-galactosidase (EC 3.2.1.23) (Acid beta-galactosidase) (Lactase) (Elastin receptor 1)	GLB1 ELNR1	cellular carbohydrate metabolic process [GO:0044262]; galactose catabolic process [GO:0019388]; glycosaminoglycan catabolic process [GO:0006027]; glycosphingolipid metabolic process [GO:0006687]; keratan sulfate catabolic process [GO:0042340]; neutrophil degranulation [GO:0043312]; response to cortisone [GO:0051413]; response to Thyroglobulin triiodothyronine [GO:1904016]	K12309;	-0.708933	-0.714095	-0.762902	-0.732294	0.475214	0.475988	0.470177	0.409899	1.18636	5.0395e-10	0.988285	0.998414
BGLR_HUMAN	P08236	8	Beta-glucuronidase (EC 3.2.1.31) (Beta-G1)	GUSB	carbohydrate metabolic process [GO:0005975]; glycosaminoglycan catabolic process [GO:0006027]; hyaluronan catabolic process [GO:0030214]; neutrophil degranulation [GO:0043312]	K01195;	-1.81156	-1.77921	-1.80374	-1.77443	0.830712	0.793421	0.735199	0.710204	2.63693	8.07734e-11	0.85626	0.9633
BI2L1_HUMAN	Q9UHR4	7	Brain-specific angiogenesis inhibitor 1-associated protein 2-like protein 1 (BAI1-associated protein 2-like protein 1) (Insulin receptor tyrosine kinase substrate)	BAIAP2L1 IRTKS	actin crosslink formation [GO:0051764]; actin filament bundle assembly [GO:0051017]; insulin receptor signaling pathway [GO:0008286]; plasma membrane organization [GO:0007009]; positive regulation of actin cytoskeleton reorganization [GO:2000251]; positive regulation of actin filament polymerization [GO:0030838]; regulation of insulin receptor signaling pathway [GO:0046626]; response to bacterium…	K20127;	0.0821698	0.0666814	0.0637139	0.0664295	-0.0477148	-0.105061	-0.0751634	-0.108062	-0.135848	0.115453	0.994175	0.776377
BICD2_HUMAN	Q8TD16	6	Protein bicaudal D homolog 2 (Bic-D 2)	BICD2 KIAA0699	centrosome localization [GO:0051642]; microtubule anchoring at microtubule organizing center [GO:0072393]; minus-end-directed organelle transport along microtubule [GO:0072385]; mRNA transport [GO:0051028]; protein localization to Golgi apparatus [GO:0034067]; protein transport [GO:0015031]; regulation of microtubule cytoskeleton organization [GO:0070507]; retrograde vesicle-mediated transport, G…	K18739;	-0.0264884	0.179729	0.0868648	0.231359	-0.177225	0.0513904	-0.0479199	-0.240792	-0.118841	0.302712	0.808593	0.536015
BID_HUMAN	P55957	7	BH3-interacting domain death agonist (p22 BID) (BID) [Cleaved into: BH3-interacting domain death agonist p15 (p15 BID); BH3-interacting domain death agonist p13 (p13 BID); BH3-interacting domain death agonist p11 (p11 BID)]	BID	activation of cysteine-type endopeptidase activity involved in apoptotic process [GO:0006919]; apoptotic mitochondrial changes [GO:0008637]; establishment of protein localization to membrane [GO:0090150]; extrinsic apoptotic signaling pathway via death domain receptors [GO:0008625]; hepatocyte apoptotic process [GO:0097284]; mitochondrial ATP synthesis coupled electron transport [GO:0042775]; mit…	K04726;	-0.00374712	0.0101767	-0.0316247	-0.0823902	0.0309408	0.0734416	-0.0337274	0.0300109	0.00555136	0.950956	0.981332	0.688734
BIEA_HUMAN	P53004	6	Biliverdin reductase A (BVR A) (EC 1.3.1.24) (Biliverdin-IX alpha-reductase)	BLVRA BLVR BVR	heme catabolic process [GO:0042167]; oxidation-reduction process [GO:0055114]	K00214;	0.0642558	0.0676079	-0.029424	0.0437682	0.0255783	-0.00479966	-0.0181131	-0.0323602	-0.0154043	0.828344	0.994053	0.468934
BIG2_HUMAN	Q9Y6D5	11	Brefeldin A-inhibited guanine nucleotide-exchange protein 2 (Brefeldin A-inhibited GEP 2) (ADP-ribosylation factor guanine nucleotide-exchange factor 2)	ARFGEF2 ARFGEP2 BIG2	endomembrane system organization [GO:0010256]; endosome organization [GO:0007032]; exocytosis [GO:0006887]; Golgi to plasma membrane transport [GO:0006893]; intracellular signal transduction [GO:0035556]; positive regulation of tumor necrosis factor production [GO:0032760]; protein transport [GO:0015031]; receptor recycling [GO:0001881]; regulation of ARF protein signal transduction [GO:0032012]	K18442;	-0.204069	-0.212752	-0.148626	-0.13959	0.151398	0.13083	0.169663	0.118111	0.302745	7.81512e-05	0.981332	0.820788
BIN1_HUMAN	O00499	6	Myc box-dependent-interacting protein 1 (Amphiphysin II) (Amphiphysin-like protein) (Box-dependent myc-interacting protein 1) (Bridging integrator 1)	BIN1 AMPHL	cell proliferation [GO:0008283]; cytoskeleton organization [GO:0007010]; endocytosis [GO:0006897]; endosome to lysosome transport [GO:0008333]; lipid tube assembly [GO:0060988]; membrane organization [GO:0061024]; negative regulation of amyloid-beta formation [GO:1902430]; negative regulation of aspartic-type endopeptidase activity involved in amyloid precursor protein catabolic process [GO:19029…	K12562;	0.331538	0.320505	0.319011	0.399389	-0.486033	-0.519301	-0.473207	-0.434361	-0.78683	7.45255e-08	0.994175	0.443831
BIP_HUMAN	P11021	39	Endoplasmic reticulum chaperone BiP (EC 3.6.4.10) (78 kDa glucose-regulated protein) (GRP-78) (Binding-immunoglobulin protein) (BiP) (Heat shock protein 70 family protein 5) (HSP70 family protein 5) (Heat shock protein family A member 5) (Immunoglobulin heavy chain-binding protein)	HSPA5 GRP78	ATF6-mediated unfolded protein response [GO:0036500]; cellular response to antibiotic [GO:0071236]; cellular response to calcium ion [GO:0071277]; cellular response to cAMP [GO:0071320]; cellular response to drug [GO:0035690]; cellular response to gamma radiation [GO:0071480]; cellular response to glucose starvation [GO:0042149]; cellular response to interleukin-4 [GO:0071353]; cellular response …	K09490;	-0.0925479	0.00403813	-0.00645163	-0.0494571	0.0154541	0.0267495	0.0267122	0.114971	0.157802	0.0251867	0.982944	0.791142
BIRC6_HUMAN	Q9NR09	6	Baculoviral IAP repeat-containing protein 6 (EC 2.3.2.27) (BIR repeat-containing ubiquitin-conjugating enzyme) (BRUCE) (RING-type E3 ubiquitin transferase BIRC6) (Ubiquitin-conjugating BIR domain enzyme apollon) (APOLLON)	BIRC6 KIAA1289	apoptotic process [GO:0006915]; cell cycle [GO:0007049]; cell division [GO:0051301]; labyrinthine layer development [GO:0060711]; negative regulation of apoptotic process [GO:0043066]; negative regulation of extrinsic apoptotic signaling pathway [GO:2001237]; positive regulation of cell proliferation [GO:0008284]; protein phosphorylation [GO:0006468]; protein ubiquitination [GO:0016567]; regulati…	K10586;	0.305174	0.309675	0.312377	0.25192	-0.34387	-0.303205	-0.249966	-0.315221	-0.673471	1.49094e-06	0.954578	0.98268
BLMH_HUMAN	Q13867	3	Bleomycin hydrolase (BH) (BLM hydrolase) (BMH) (EC 3.4.22.40)	BLMH	homocysteine catabolic process [GO:0043418]; protein polyubiquitination [GO:0000209]; proteolysis [GO:0006508]; response to drug [GO:0042493]; response to toxic substance [GO:0009636]	K01372;	0.301689	0.104005	0.0702645	-0.041917	-0.0896354	-0.197887	-0.0954717	-0.267309	-0.384894	0.00562011	0.913278	0.351793
BLVRB_HUMAN	P30043	6	Flavin reductase (NADPH) (FR) (EC 1.5.1.30) (Biliverdin reductase B) (BVR-B) (EC 1.3.1.24) (Biliverdin-IX beta-reductase) (Green heme-binding protein) (GHBP) (NADPH-dependent diaphorase) (NADPH-flavin reductase) (FLR)	BLVRB FLR	heme catabolic process [GO:0042167]	K05901;	-0.23006	-0.262164	-0.139678	-0.212009	0.270878	0.225067	0.233112	0.166887	0.453076	8.57199e-05	0.990919	0.938059
BMS1_HUMAN	Q14692	2	Ribosome biogenesis protein BMS1 homolog (Ribosome assembly protein BMS1 homolog)	BMS1 BMS1L KIAA0187	endonucleolytic cleavage of tricistronic rRNA transcript (SSU-rRNA, 5.8S rRNA, LSU-rRNA) [GO:0000479]; maturation of SSU-rRNA from tricistronic rRNA transcript (SSU-rRNA, 5.8S rRNA, LSU-rRNA) [GO:0000462]; rRNA processing [GO:0006364]	K14569;	-0.106314	0.292953	0.0673367	0.150458	-0.129892	0.0158886	-0.30879	-0.122129	-0.515987	0.818262	0.981332	0.534475
BOLA2_HUMAN	Q9H3K6	2	BolA-like protein 2	BOLA2 BOLA2A My016; BOLA2B	[2Fe-2S] cluster assembly [GO:0044571]; interleukin-12-mediated signaling pathway [GO:0035722]; protein maturation by iron-sulfur cluster transfer [GO:0097428]		0.13986	0.196407	0.268411	0.287298	-0.29018	-0.366195	-0.270941	-0.27811	-0.441882	0.000108455	0.936547	0.675697
BOP1_HUMAN	Q14137	3	Ribosome biogenesis protein BOP1 (Block of proliferation 1 protein)	BOP1 KIAA0124	cell proliferation [GO:0008283]; cleavage in ITS2 between 5.8S rRNA and LSU-rRNA of tricistronic rRNA transcript (SSU-rRNA, 5.8S rRNA, LSU-rRNA) [GO:0000448]; maturation of LSU-rRNA from tricistronic rRNA transcript (SSU-rRNA, 5.8S rRNA, LSU-rRNA) [GO:0000463]; regulation of cell cycle [GO:0051726]; regulation of signal transduction by p53 class mediator [GO:1901796]; ribosomal large subunit asse…	K14824;	0.376616	0.418407	0.431674	0.303532	-0.498484	-0.385306	-0.515254	-0.325878	-0.927774	1.84184e-05	0.989463	0.716097
BORG4_HUMAN	Q9H3Q1	3	Cdc42 effector protein 4 (Binder of Rho GTPases 4)	CDC42EP4 BORG4 CEP4	cellular response to interferon-gamma [GO:0071346]; positive regulation of actin filament polymerization [GO:0030838]; positive regulation of pseudopodium assembly [GO:0031274]; regulation of cell shape [GO:0008360]; Rho protein signal transduction [GO:0007266]		-0.141492	-0.00285394	-0.314277	0.0469564	0.219622	0.26647	0.304837	-0.0131779	0.380937	0.00731479	0.934909	0.590496
BPNT1_HUMAN	O95861	4	3'(2'),5'-bisphosphate nucleotidase 1 (EC 3.1.3.7) (Bisphosphate 3'-nucleotidase 1) (PAP-inositol 1,4-phosphatase) (PIP)	BPNT1	3'-phosphoadenosine 5'-phosphosulfate metabolic process [GO:0050427]; nervous system development [GO:0007399]; nucleobase-containing compound metabolic process [GO:0006139]; phosphatidylinositol phosphorylation [GO:0046854]	K01082;	-0.124828	-0.112896	-0.288001	-0.109785	0.103063	0.108042	0.0169387	0.0800831	0.276274	0.00717889	0.957264	0.613213
BRAT1_HUMAN	Q6PJG6	4	BRCA1-associated ATM activator 1 (BRCA1-associated protein required for ATM activation protein 1)	BRAT1 BAAT1 C7orf27	apoptotic process [GO:0006915]; cell migration [GO:0016477]; cell proliferation [GO:0008283]; cellular response to DNA damage stimulus [GO:0006974]; glucose metabolic process [GO:0006006]; mitochondrion localization [GO:0051646]; positive regulation of cell growth [GO:0030307]; positive regulation of protein phosphorylation [GO:0001934]; response to ionizing radiation [GO:0010212]		0.352573	0.383933	0.314654	0.379448	-0.457452	-0.472195	-0.414456	-0.399058	-1.014	5.51804e-05	0.983852	0.954212
BRCC3_HUMAN	P46736	2	Lys-63-specific deubiquitinase BRCC36 (EC 3.4.19.-) (BRCA1-A complex subunit BRCC36) (BRCA1/BRCA2-containing complex subunit 3) (BRCA1/BRCA2-containing complex subunit 36) (BRISC complex subunit BRCC36)	BRCC3 BRCC36 C6.1A CXorf53	cell cycle [GO:0007049]; cell division [GO:0051301]; double-strand break repair [GO:0006302]; double-strand break repair via nonhomologous end joining [GO:0006303]; histone H2A K63-linked deubiquitination [GO:0070537]; positive regulation of DNA repair [GO:0045739]; protein deubiquitination [GO:0016579]; protein K63-linked deubiquitination [GO:0070536]; response to ionizing radiation [GO:0010212]…	K11864;	0.090895	0.195409	0.169623	0.475224	-0.219514	-0.30929	-0.550056	-0.367408	-0.342009	0.0923853	0.85626	0.667092
BRD4_HUMAN	O60885	10	Bromodomain-containing protein 4 (Protein HUNK1)	BRD4 HUNK1	cellular response to DNA damage stimulus [GO:0006974]; chromatin organization [GO:0006325]; chromatin remodeling [GO:0006338]; negative regulation of DNA damage checkpoint [GO:2000002]; positive regulation of G2/M transition of mitotic cell cycle [GO:0010971]; positive regulation of histone H3-K36 trimethylation [GO:2001255]; positive regulation of I-kappaB kinase/NF-kappaB signaling [GO:0043123]…	K11722;	-0.178313	-0.255791	-0.205349	-0.227641	0.149639	0.206815	0.140291	0.128228	0.28609	0.00140529	0.988285	0.8244
BRE1A_HUMAN	Q5VTR2	9	E3 ubiquitin-protein ligase BRE1A (BRE1-A) (hBRE1) (EC 2.3.2.27) (RING finger protein 20) (RING-type E3 ubiquitin transferase BRE1A)	RNF20 BRE1A	histone H2B ubiquitination [GO:0033523]; histone monoubiquitination [GO:0010390]; negative regulation of cell migration [GO:0030336]; negative regulation of mRNA polyadenylation [GO:1900364]; positive regulation of histone H2B ubiquitination [GO:2001168]; positive regulation of histone methylation [GO:0031062]; positive regulation of transcription, DNA-templated [GO:0045893]; protein polyubiquiti…	K10696;	0.0522364	0.0363368	0.0249862	-0.00641615	0.0105237	0.00925005	0.0156562	0.0127929	-0.0561719	0.39949	0.999413	0.71682
BRE1B_HUMAN	O75150	5	E3 ubiquitin-protein ligase BRE1B (BRE1-B) (EC 2.3.2.27) (95 kDa retinoblastoma-associated protein) (RBP95) (RING finger protein 40) (RING-type E3 ubiquitin transferase BRE1B)	RNF40 BRE1B KIAA0661	histone H2B ubiquitination [GO:0033523]; histone monoubiquitination [GO:0010390]; negative regulation of mRNA polyadenylation [GO:1900364]; positive regulation of histone H2B ubiquitination [GO:2001168]; positive regulation of proteasomal protein catabolic process [GO:1901800]; positive regulation of protein polyubiquitination [GO:1902916]; protein ubiquitination [GO:0016567]; response to peptide…	K10696;	-0.0458653	0.0815182	0.0457927	0.0533321	-0.180451	-0.0036814	0.00333238	-0.00577493	-0.167565	0.326275	0.96594	0.693891
BRK1_HUMAN	Q8WUW1	2	Protein BRICK1 (BRK1)	BRK1 C3orf10 HSPC300 MDS027	actin filament organization [GO:0007015]; cell motility [GO:0048870]; Fc-gamma receptor signaling pathway involved in phagocytosis [GO:0038096]; in utero embryonic development [GO:0001701]; positive regulation of Arp2/3 complex-mediated actin nucleation [GO:2000601]; positive regulation of cell proliferation [GO:0008284]; positive regulation of lamellipodium assembly [GO:0010592]; protein homotri…	K05752;	0.0294704	0.174209	0.0224631	0.0776331	-0.0401103	-0.14953	-0.128004	0.0370053	-0.0643351	0.553545	0.981332	0.65554
BROX_HUMAN	Q5VW32	4	BRO1 domain-containing protein BROX (BRO1 domain- and CAAX motif-containing protein)	BROX BROFTI C1orf58			-0.226753	-0.28029	-0.302575	-0.0625207	0.129812	0.0445632	0.0545926	0.186972	0.407472	0.00182327	0.841996	0.698665
BRX1_HUMAN	Q8TDN6	6	Ribosome biogenesis protein BRX1 homolog (Brix domain-containing protein 2)	BRIX1 BRIX BXDC2	ribosomal large subunit assembly [GO:0000027]	K14820;	0.0767822	-0.0220893	0.0692821	0.108647	-0.115477	-0.156995	-0.111395	0.00810428	-0.176068	0.00900136	0.864096	0.257966
BST2_HUMAN	Q10589	3	Bone marrow stromal antigen 2 (BST-2) (HM1.24 antigen) (Tetherin) (CD antigen CD317)	BST2	B cell activation [GO:0042113]; cell-cell signaling [GO:0007267]; cell proliferation [GO:0008283]; defense response to virus [GO:0051607]; humoral immune response [GO:0006959]; innate immune response [GO:0045087]; multicellular organism development [GO:0007275]; negative regulation of cell growth [GO:0030308]; negative regulation of cell migration [GO:0030336]; negative regulation of intracellula…	K06731;	-0.171754	-0.361508	-0.333191	-0.250334	0.242402	0.206866	0.239691	0.128569	0.430587	4.57192e-05	0.978908	0.419898
BT3L4_HUMAN	Q96K17	3	Transcription factor BTF3 homolog 4 (Basic transcription factor 3-like 4)	BTF3L4		K01527;	-0.0341851	-0.0368315	-0.118049	-0.0923451	0.13079	0.0387724	0.012777	0.127021	0.140305	0.0789735	0.936547	0.637444
BTAF1_HUMAN	O14981	3	TATA-binding protein-associated factor 172 (EC 3.6.4.-) (ATP-dependent helicase BTAF1) (B-TFIID transcription factor-associated 170 kDa subunit) (TAF(II)170) (TBP-associated factor 172) (TAF-172)	BTAF1 TAF172	negative regulation of chromatin binding [GO:0035562]; negative regulation of transcription, DNA-templated [GO:0045892]	K15192;	-0.580837	0.078519	-0.0112795	0.106375	-0.0688	0.0934014	0.0259545	-0.17178	0.604525	0.0938493	0.981332	0.436662
BTF3_HUMAN	P20290	6	Transcription factor BTF3 (Nascent polypeptide-associated complex subunit beta) (NAC-beta) (RNA polymerase B transcription factor 3)	BTF3 NACB OK/SW-cl.8	protein transport [GO:0015031]; regulation of transcription, DNA-templated [GO:0006355]; transcription by RNA polymerase II [GO:0006366]	K01527;	0.179402	0.288951	0.146333	0.324052	-0.332038	-0.292282	-0.330513	-0.235945	-0.535624	8.00587e-06	0.957264	0.718273
BUB3_HUMAN	O43684	10	Mitotic checkpoint protein BUB3	BUB3	anaphase-promoting complex-dependent catabolic process [GO:0031145]; attachment of spindle microtubules to kinetochore [GO:0008608]; cell division [GO:0051301]; meiotic cell cycle [GO:0051321]; mitotic sister chromatid segregation [GO:0000070]; mitotic spindle assembly checkpoint [GO:0007094]	K02180;	0.0401697	0.0751174	0.0346867	0.012657	-0.0560007	-0.0662802	-0.0247045	-0.0653856	-0.0899602	0.115041	0.988285	0.793005
BUD23_HUMAN	O43709	4	Probable 18S rRNA (guanine-N(7))-methyltransferase (EC 2.1.1.-) (Bud site selection protein 23 homolog) (Metastasis-related methyltransferase 1) (Williams-Beuren syndrome chromosomal region 22 protein) (rRNA methyltransferase and ribosome maturation factor)	BUD23 MERM1 WBSCR22 HUSSY-03 PP3381	chromatin organization [GO:0006325]; positive regulation of rRNA processing [GO:2000234]; regulation of transcription, DNA-templated [GO:0006355]; rRNA (guanine-N7)-methylation [GO:0070476]; transcription, DNA-templated [GO:0006351]	K19306;	0.114112	0.0632071	0.153483	0.234408	-0.195435	-0.117681	-0.190908	-0.12558	-0.389333	0.0250649	0.952882	0.409459
BUD31_HUMAN	P41223	4	Protein BUD31 homolog (Protein EDG-2) (Protein G10 homolog)	BUD31 EDG2	mRNA splicing, via spliceosome [GO:0000398]; positive regulation of androgen receptor activity [GO:2000825]; regulation of transcription by RNA polymerase II [GO:0006357]; transcription, DNA-templated [GO:0006351]	K12873;	0.0473441	0.0788157	0.0503116	0.0942895	-0.0971471	-0.0457456	-0.0313276	-0.169691	-0.151435	0.164445	0.997926	0.95989
BYST_HUMAN	Q13895	5	Bystin	BYSL	cell adhesion [GO:0007155]; cell proliferation [GO:0008283]; female pregnancy [GO:0007565]; maturation of SSU-rRNA from tricistronic rRNA transcript (SSU-rRNA, 5.8S rRNA, LSU-rRNA) [GO:0000462]; trophectodermal cell differentiation [GO:0001829]	K14797;	0.0632916	-0.0744688	0.0479047	0.29171	-0.145519	-0.102338	-0.0839983	0.0543821	-0.141752	0.377214	0.946464	0.369272
BZW1_HUMAN	Q7L1Q6	13	Basic leucine zipper and W2 domain-containing protein 1 (Protein Orf)	BZW1 BZAP45 KIAA0005	regulation of transcription, DNA-templated [GO:0006355]; transcription, DNA-templated [GO:0006351]		-0.0356234	-0.0411053	-0.00768755	-0.0052134	0.0117345	-0.0652047	-0.101235	0.0750634	0.0724828	0.372494	0.882049	0.870804
BZW2_HUMAN	Q9Y6E2	7	Basic leucine zipper and W2 domain-containing protein 2	BZW2 HSPC028 MSTP017	cell differentiation [GO:0030154]; nervous system development [GO:0007399]		0.213751	0.20067	0.233957	0.214117	-0.30989	-0.198653	-0.330262	-0.238649	-0.530281	2.19474e-07	0.968344	0.813954
C10_HUMAN	Q99622	2	Protein C10	C12orf57 C10	camera-type eye morphogenesis [GO:0048593]; cognition [GO:0050890]; corpus callosum morphogenesis [GO:0021540]; post-embryonic development [GO:0009791]; psychomotor behavior [GO:0036343]; regulation of skeletal muscle contraction [GO:0014819]; third ventricle development [GO:0021678]		0.112405	0.245216	0.100672	0.225452	-0.265018	-0.227366	-0.190865	-0.160323	-0.362411	0.000167318	0.981332	0.66829
C1QBP_HUMAN	Q07021	5	Complement component 1 Q subcomponent-binding protein, mitochondrial (ASF/SF2-associated protein p32) (Glycoprotein gC1qBP) (C1qBP) (Hyaluronan-binding protein 1) (Mitochondrial matrix protein p32) (gC1q-R protein) (p33)	C1QBP GC1QBP HABP1 SF2P32	apoptotic process [GO:0006915]; blood coagulation, intrinsic pathway [GO:0007597]; complement activation, classical pathway [GO:0006958]; immune response [GO:0006955]; innate immune response [GO:0045087]; mature ribosome assembly [GO:0042256]; mRNA processing [GO:0006397]; negative regulation of defense response to virus [GO:0050687]; negative regulation of interferon-gamma production [GO:0032689…	K15414;	0.319779	0.213001	0.216521	0.275131	-0.234692	-0.329409	-0.260402	-0.309941	-0.658885	3.80392e-05	0.998719	0.637967
C1TC_HUMAN	P11586	26	C-1-tetrahydrofolate synthase, cytoplasmic (C1-THF synthase) [Cleaved into: C-1-tetrahydrofolate synthase, cytoplasmic, N-terminally processed] [Includes: Methylenetetrahydrofolate dehydrogenase (EC 1.5.1.5); Methenyltetrahydrofolate cyclohydrolase (EC 3.5.4.9); Formyltetrahydrofolate synthetase (EC 6.3.4.3)]	MTHFD1 MTHFC MTHFD	10-formyltetrahydrofolate biosynthetic process [GO:0009257]; embryonic neurocranium morphogenesis [GO:0048702]; embryonic viscerocranium morphogenesis [GO:0048703]; folic acid metabolic process [GO:0046655]; heart development [GO:0007507]; histidine biosynthetic process [GO:0000105]; methionine biosynthetic process [GO:0009086]; methionine metabolic process [GO:0006555]; neural tube closure [GO:0…	K00288;	0.100189	0.0765105	0.0150847	0.0472063	-0.066991	-0.0840393	-0.160312	-0.0876458	-0.167649	0.0016405	0.981332	0.767165
C1TM_HUMAN	Q6UB35	18	Monofunctional C1-tetrahydrofolate synthase, mitochondrial (EC 6.3.4.3) (Formyltetrahydrofolate synthetase)	MTHFD1L FTHFSDC1	10-formyltetrahydrofolate biosynthetic process [GO:0009257]; embryonic neurocranium morphogenesis [GO:0048702]; embryonic viscerocranium morphogenesis [GO:0048703]; folic acid-containing compound metabolic process [GO:0006760]; folic acid metabolic process [GO:0046655]; formate metabolic process [GO:0015942]; neural tube closure [GO:0001843]; purine nucleobase biosynthetic process [GO:0009113]; t…	K13402;	-0.0689275	-0.0332413	-0.0380812	-0.0209244	0.0200599	0.0676702	0.0255841	0.0160239	0.0678922	0.120103	0.96594	0.940423
C2D1A_HUMAN	Q6P1N0	11	Coiled-coil and C2 domain-containing protein 1A (Akt kinase-interacting protein 1) (Five prime repressor element under dual repression-binding protein 1) (FRE under dual repression-binding protein 1) (Freud-1) (Putative NF-kappa-B-activating protein 023N)	CC2D1A AKI1	negative regulation of transcription by RNA polymerase II [GO:0000122]; positive regulation of I-kappaB kinase/NF-kappaB signaling [GO:0043123]; transcription, DNA-templated [GO:0006351]	K18260;	-0.0601272	-0.0218658	-0.064595	-0.0735713	0.0614696	0.0656278	0.067916	0.0463548	0.13791	0.00879735	0.991814	0.896573
C43BP_HUMAN	Q9Y5P4	4	Collagen type IV alpha-3-binding protein (Ceramide transfer protein) (hCERT) (Goodpasture antigen-binding protein) (GPBP) (START domain-containing protein 11) (StARD11) (StAR-related lipid transfer protein 11)	COL4A3BP CERT STARD11	ER to Golgi ceramide transport [GO:0035621]; immune response [GO:0006955]; intermembrane sphingolipid transfer [GO:0120012]; sphingolipid biosynthetic process [GO:0030148]	K08283;	0.142769	0.0952912	0.168757	-0.112209	0.00613666	0.0433396	0.0564646	-0.064875	-0.129518	0.104585	0.863371	0.323675
C560_HUMAN	Q99643	2	Succinate dehydrogenase cytochrome b560 subunit, mitochondrial (Integral membrane protein CII-3) (QPs-1) (QPs1) (Succinate dehydrogenase complex subunit C) (Succinate-ubiquinone oxidoreductase cytochrome B large subunit) (CYBL)	SDHC CYB560 SDH3	aerobic respiration [GO:0009060]; mitochondrial electron transport, succinate to ubiquinone [GO:0006121]; oxidation-reduction process [GO:0055114]; tricarboxylic acid cycle [GO:0006099]	K00236;	-0.284123	-0.356626	-0.429405	-0.279607	0.147676	0.280896	0.294181	0.218005	0.456028	0.00881126	0.989463	0.723621
CA123_HUMAN	Q9NWV4	4	UPF0587 protein C1orf123	C1orf123			-0.173725	-0.081174	-0.17664	-0.235729	0.15803	0.141026	0.100675	0.0781345	0.36814	0.00012446	0.897178	0.332652
CAB39_HUMAN	Q9Y376	7	Calcium-binding protein 39 (MO25alpha) (Protein Mo25)	CAB39 MO25 CGI-66	cell cycle arrest [GO:0007050]; cellular hypotonic response [GO:0071476]; intracellular signal transduction [GO:0035556]; negative regulation of potassium ion transmembrane transport [GO:1901380]; negative regulation of potassium ion transmembrane transporter activity [GO:1901017]; neutrophil degranulation [GO:0043312]; peptidyl-serine phosphorylation [GO:0018105]; positive regulation of peptidyl…	K08272;	-0.058468	-0.0667762	-0.00640942	0.0213304	-0.000884859	0.0568591	0.0159235	0.0371937	0.0603884	0.292174	0.981332	0.885056
CAB45_HUMAN	Q9BRK5	5	45 kDa calcium-binding protein (Cab45) (Stromal cell-derived factor 4) (SDF-4)	SDF4 CAB45 PSEC0034	calcium ion regulated exocytosis [GO:0017156]; cerebellum development [GO:0021549]; fat cell differentiation [GO:0045444]; response to ethanol [GO:0045471]; UV protection [GO:0009650]; zymogen granule exocytosis [GO:0070625]	K19934;	0.0189519	-0.027781	-0.0203661	-0.0165049	0.0604678	-0.0529	0.100698	0.0468773	0.0202076	0.796882	0.915082	0.919764
CACP_HUMAN	P43155	2	Carnitine O-acetyltransferase (Carnitine acetylase) (EC 2.3.1.7) (Carnitine acetyltransferase) (CAT) (CrAT)	CRAT CAT1	carnitine metabolic process, CoA-linked [GO:0019254]; fatty acid beta-oxidation using acyl-CoA oxidase [GO:0033540]; protein targeting to peroxisome [GO:0006625]		-0.270345	-0.322954	-0.210824	-0.323844	0.147616	0.185424	0.261662	0.226909	0.43778	0.0602495	0.990919	0.911129
CADH1_HUMAN	P12830	9	Cadherin-1 (CAM 120/80) (Epithelial cadherin) (E-cadherin) (Uvomorulin) (CD antigen CD324) [Cleaved into: E-Cad/CTF1; E-Cad/CTF2; E-Cad/CTF3]	CDH1 CDHE UVO	adherens junction organization [GO:0034332]; cell-cell adhesion [GO:0098609]; cellular response to indole-3-methanol [GO:0071681]; cellular response to lithium ion [GO:0071285]; entry of bacterium into host cell [GO:0035635]; extracellular matrix organization [GO:0030198]; homophilic cell adhesion via plasma membrane adhesion molecules [GO:0007156]; negative regulation of cell-cell adhesion [GO:0…	K05689;	-0.272293	-0.178578	-0.288831	-0.296706	0.227378	0.252279	0.202975	0.0987727	0.509028	1.25867e-07	0.913278	0.511352
CADH3_HUMAN	P22223	5	Cadherin-3 (Placental cadherin) (P-cadherin)	CDH3 CDHP	adherens junction organization [GO:0034332]; canonical Wnt signaling pathway [GO:0060070]; cell adhesion [GO:0007155]; hair cycle process [GO:0022405]; homophilic cell adhesion via plasma membrane adhesion molecules [GO:0007156]; keratinization [GO:0031424]; negative regulation of timing of catagen [GO:0051796]; negative regulation of transforming growth factor beta2 production [GO:0032912]; posi…	K06796;	-0.145932	-0.0671763	0.0218475	-0.0695231	0.046671	0.135719	0.0747381	0.0319296	0.207512	0.00283159	0.936547	0.529417
CAF1B_HUMAN	Q13112	5	Chromatin assembly factor 1 subunit B (CAF-1 subunit B) (Chromatin assembly factor I p60 subunit) (CAF-I 60 kDa subunit) (CAF-I p60) (M-phase phosphoprotein 7)	CHAF1B CAF1A CAF1P60 MPHOSPH7 MPP7	cell cycle [GO:0007049]; chromatin assembly [GO:0031497]; DNA repair [GO:0006281]; DNA replication [GO:0006260]; DNA replication-dependent nucleosome assembly [GO:0006335]; regulation of transcription, DNA-templated [GO:0006355]; transcription, DNA-templated [GO:0006351]	K10751;	-0.00879826	0.0655463	0.0716748	0.104066	-0.0334286	-0.0472412	-0.0571985	-0.0417522	-0.0493829	0.340995	0.988285	0.608187
CALB2_HUMAN	P22676	2	Calretinin (CR) (29 kDa calbindin)	CALB2 CAB29	regulation of cytosolic calcium ion concentration [GO:0051480]		0.427481	0.451034	0.455482	0.65084	-0.796612	-0.71072	-0.623874	-0.426099	-1.13751	2.28865e-05	0.936547	0.637967
CALD1_HUMAN	Q05682	7	Caldesmon (CDM)	CALD1 CAD CDM	muscle contraction [GO:0006936]	K12327;	-0.181445	-0.413209	-0.373633	-0.400388	0.195558	0.301798	0.358073	0.236149	0.432314	0.00208095	0.934909	0.652505
CALR_HUMAN	P27797	15	Calreticulin (CRP55) (Calregulin) (Endoplasmic reticulum resident protein 60) (ERp60) (HACBP) (grp60)	CALR CRTC	antigen processing and presentation of exogenous peptide antigen via MHC class I, TAP-dependent [GO:0002479]; antigen processing and presentation of peptide antigen via MHC class I [GO:0002474]; ATF6-mediated unfolded protein response [GO:0036500]; cardiac muscle cell differentiation [GO:0055007]; cellular calcium ion homeostasis [GO:0006874]; cellular response to lithium ion [GO:0071285]; cellul…	K08057;	-0.148857	-0.161878	-0.151428	-0.182113	0.104198	0.106677	0.168716	0.0928866	0.249049	0.00460216	0.997926	0.8244
CALU_HUMAN	O43852	13	Calumenin (Crocalbin) (IEF SSP 9302)	CALU	cellular protein metabolic process [GO:0044267]; post-translational protein modification [GO:0043687]		-0.239512	-0.36328	-0.351309	-0.306747	0.213333	0.191235	0.212439	0.271269	0.465227	7.70744e-05	0.981332	0.404106
CALX_HUMAN	P27824	19	Calnexin (IP90) (Major histocompatibility complex class I antigen-binding protein p88) (p90)	CANX	aging [GO:0007568]; antigen processing and presentation of exogenous peptide antigen via MHC class II [GO:0019886]; antigen processing and presentation of peptide antigen via MHC class I [GO:0002474]; chaperone-mediated protein folding [GO:0061077]; clathrin-dependent endocytosis [GO:0072583]; interleukin-27-mediated signaling pathway [GO:0070106]; interleukin-35-mediated signaling pathway [GO:00…	K08054;	-0.032398	-0.131094	-0.0381862	-0.0325502	0.0600531	-0.001704	-0.0109021	0.0541307	0.0468287	0.593111	0.993272	0.550871
CAN1_HUMAN	P07384	24	Calpain-1 catalytic subunit (EC 3.4.22.52) (Calcium-activated neutral proteinase 1) (CANP 1) (Calpain mu-type) (Calpain-1 large subunit) (Cell proliferation-inducing gene 30 protein) (Micromolar-calpain) (muCANP)	CAPN1 CANPL1 PIG30	cornification [GO:0070268]; mammary gland involution [GO:0060056]; neutrophil degranulation [GO:0043312]; positive regulation of cell proliferation [GO:0008284]; proteolysis [GO:0006508]; receptor catabolic process [GO:0032801]; regulation of catalytic activity [GO:0050790]; regulation of macroautophagy [GO:0016241]; regulation of NMDA receptor activity [GO:2000310]; self proteolysis [GO:0097264]	K01367;	-0.165586	-0.201046	-0.219205	-0.129269	0.149647	0.135714	0.183768	0.112474	0.317728	1.7166e-05	0.897178	0.810197
CAN2_HUMAN	P17655	15	Calpain-2 catalytic subunit (EC 3.4.22.53) (Calcium-activated neutral proteinase 2) (CANP 2) (Calpain M-type) (Calpain large polypeptide L2) (Calpain-2 large subunit) (Millimolar-calpain) (M-calpain)	CAPN2 CANPL2	blastocyst development [GO:0001824]; cellular response to amino acid stimulus [GO:0071230]; myoblast fusion [GO:0007520]; protein autoprocessing [GO:0016540]; proteolysis [GO:0006508]; proteolysis involved in cellular protein catabolic process [GO:0051603]; regulation of cytoskeleton organization [GO:0051493]; response to hypoxia [GO:0001666]	K03853;	-0.0228528	-0.0440424	-0.0391508	-0.0811595	0.0205105	0.0384983	0.011226	0.0946513	0.0615832	0.283788	0.938272	0.837668
CAND1_HUMAN	Q86VP6	31	Cullin-associated NEDD8-dissociated protein 1 (Cullin-associated and neddylation-dissociated protein 1) (TBP-interacting protein of 120 kDa A) (TBP-interacting protein 120A) (p120 CAND1)	CAND1 KIAA0829 TIP120 TIP120A	cell differentiation [GO:0030154]; cellular iron ion homeostasis [GO:0006879]; negative regulation of catalytic activity [GO:0043086]; neutrophil degranulation [GO:0043312]; positive regulation of RNA polymerase II transcriptional preinitiation complex assembly [GO:0045899]; post-translational protein modification [GO:0043687]; protein ubiquitination [GO:0016567]; SCF complex assembly [GO:0010265]	K17263;	-0.129389	-0.082461	-0.0988177	-0.122069	0.104248	0.0915108	0.0883531	0.0915549	0.258655	2.48025e-05	0.989587	0.793643
CAP1_HUMAN	Q01518	17	Adenylyl cyclase-associated protein 1 (CAP 1)	CAP1 CAP	actin polymerization or depolymerization [GO:0008154]; activation of adenylate cyclase activity [GO:0007190]; ameboidal-type cell migration [GO:0001667]; cell morphogenesis [GO:0000902]; establishment or maintenance of cell polarity [GO:0007163]; neutrophil degranulation [GO:0043312]; receptor-mediated endocytosis [GO:0006898]; signal transduction [GO:0007165]	K17261;	0.0187084	0.00202072	0.00525167	-0.00147083	-0.0704262	-0.0291757	-0.0915832	-0.0165385	-0.0458427	0.514774	0.936547	0.999806
CAP2_HUMAN	P40123	8	Adenylyl cyclase-associated protein 2 (CAP 2)	CAP2	actin polymerization or depolymerization [GO:0008154]; activation of adenylate cyclase activity [GO:0007190]; cell morphogenesis [GO:0000902]; establishment or maintenance of cell polarity [GO:0007163]; signal transduction [GO:0007165]	K17261;	0.43796	0.397717	0.292793	0.238564	-0.421656	-0.490232	-0.419689	-0.545039	-0.831988	1.05321e-06	0.954578	0.393929
CAPG_HUMAN	P40121	10	Macrophage-capping protein (Actin regulatory protein CAP-G)	CAPG AFCP MCP	barbed-end actin filament capping [GO:0051016]; protein-containing complex assembly [GO:0065003]	K10368;	-0.575498	-0.637799	-0.643067	-0.589013	0.414931	0.411776	0.419718	0.375633	0.98532	9.55735e-09	0.981332	0.624265
CAPR1_HUMAN	Q14444	13	Caprin-1 (Cell cycle-associated protein 1) (Cytoplasmic activation- and proliferation-associated protein 1) (GPI-anchored membrane protein 1) (GPI-anchored protein p137) (GPI-p137) (p137GPI) (Membrane component chromosome 11 surface marker 1) (RNA granule protein 105)	CAPRIN1 GPIAP1 GPIP137 M11S1 RNG105	negative regulation of translation [GO:0017148]; positive regulation of dendrite morphogenesis [GO:0050775]; positive regulation of dendritic spine morphogenesis [GO:0061003]	K18743;	0.18897	0.168912	0.212806	0.188493	-0.232789	-0.310756	-0.230082	-0.158667	-0.419709	2.49533e-05	0.841996	0.917403
CAPZB_HUMAN	P47756	7	F-actin-capping protein subunit beta (CapZ beta)	CAPZB	actin cytoskeleton organization [GO:0030036]; antigen processing and presentation of exogenous peptide antigen via MHC class II [GO:0019886]; barbed-end actin filament capping [GO:0051016]; blood coagulation [GO:0007596]; cytoskeleton organization [GO:0007010]; ER to Golgi vesicle-mediated transport [GO:0006888]; negative regulation of filopodium assembly [GO:0051490]; regulation of cell morphoge…	K10365;	-0.024205	-0.0159992	-0.0314386	-0.0265955	0.040927	0.000912261	0.00906345	0.0446405	0.0827055	0.0566375	0.981332	0.994376
CARF_HUMAN	Q9NXV6	5	CDKN2A-interacting protein (Collaborator of ARF)	CDKN2AIP CARF	cellular response to DNA damage stimulus [GO:0006974]; negative regulation of cell growth [GO:0030308]; positive regulation of cell growth [GO:0030307]; positive regulation of signal transduction [GO:0009967]; regulation of protein stability [GO:0031647]		-0.593788	-0.490405	-0.157761	-0.180035	0.159813	0.209872	0.318041	0.0712756	0.693293	7.81512e-05	0.85626	0.413184
CARL1_HUMAN	Q5VZK9	3	F-actin-uncapping protein LRRC16A (CARMIL homolog) (Capping protein regulator and myosin 1 linker protein 1) (Capping protein, Arp2/3 and myosin-I linker homolog 1) (Capping protein, Arp2/3 and myosin-I linker protein 1) (Leucine-rich repeat-containing protein 16A)	CARMIL1 CARMIL LRRC16 LRRC16A	actin filament network formation [GO:0051639]; actin filament organization [GO:0007015]; barbed-end actin filament uncapping [GO:0051638]; blood coagulation [GO:0007596]; cell migration [GO:0016477]; lamellipodium assembly [GO:0030032]; macropinocytosis [GO:0044351]; negative regulation of barbed-end actin filament capping [GO:2000813]; positive regulation of actin filament polymerization [GO:003…	K20493;	0.0187853	-0.0625106	0.150593	0.0157453	0.0202479	-0.168172	-0.110285	0.0138532	-0.035321	0.81571	0.989463	0.705582
CARM1_HUMAN	Q86X55	2	Histone-arginine methyltransferase CARM1 (EC 2.1.1.319) (Coactivator-associated arginine methyltransferase 1) (Protein arginine N-methyltransferase 4)	CARM1 PRMT4	aging [GO:0007568]; DNA damage response, signal transduction by p53 class mediator resulting in cell cycle arrest [GO:0006977]; endochondral bone morphogenesis [GO:0060350]; histone H3-R17 methylation [GO:0034971]; histone H3-R2 methylation [GO:0034970]; histone methylation [GO:0016571]; intracellular estrogen receptor signaling pathway [GO:0030520]; negative regulation of dendrite development [G…	K05931;	0.669703	0.479675	-0.704841	-0.764819	-0.525422	-0.62875	-0.00752093	0.0382049	-0.915316	0.0546531	0.954578	0.169927
CASC4_HUMAN	Q6P4E1	2	Protein CASC4 (Cancer susceptibility candidate gene 4 protein)	CASC4 UNQ2573/PRO6308			0.184385	-0.0445592	0.0737208	0.113736	-0.253134	-0.0632687	-0.0123874	-0.0976288	-0.407476	0.00639342	0.988285	0.282585
CASP3_HUMAN	P42574	3	Caspase-3 (CASP-3) (EC 3.4.22.56) (Apopain) (Cysteine protease CPP32) (CPP-32) (Protein Yama) (SREBP cleavage activity 1) (SCA-1) [Cleaved into: Caspase-3 subunit p17; Caspase-3 subunit p12]	CASP3 CPP32	apoptotic DNA fragmentation [GO:0006309]; apoptotic process [GO:0006915]; apoptotic signaling pathway [GO:0097190]; B cell homeostasis [GO:0001782]; cell fate commitment [GO:0045165]; cellular response to DNA damage stimulus [GO:0006974]; cellular response to staurosporine [GO:0072734]; cytokine-mediated signaling pathway [GO:0019221]; erythrocyte differentiation [GO:0030218]; execution phase of …	K02187;	-0.0134786	0.0769488	-0.0244533	0.0502027	-0.179203	-0.126271	-0.0996322	-0.00775584	-0.152841	0.0596248	0.92875	0.553712
CASP4_HUMAN	P49662	2	Caspase-4 (CASP-4) (EC 3.4.22.57) (ICE and Ced-3 homolog 2) (ICH-2) (ICE(rel)-II) (Mih1) (Protease TX) [Cleaved into: Caspase-4 subunit 1; Caspase-4 subunit 2]	CASP4 ICH2	apoptotic process [GO:0006915]; cellular response to amyloid-beta [GO:1904646]; execution phase of apoptosis [GO:0097194]; inflammatory response [GO:0006954]; innate immune response [GO:0045087]; intrinsic apoptotic signaling pathway [GO:0097193]; intrinsic apoptotic signaling pathway in response to endoplasmic reticulum stress [GO:0070059]; positive regulation of tumor necrosis factor-mediated s…	K04394;	-0.318031	-0.42577	-0.347241	-0.244808	0.322409	0.239769	0.23874	0.319253	0.655039	9.19333e-07	0.988285	0.684352
CASP7_HUMAN	P55210	4	Caspase-7 (CASP-7) (EC 3.4.22.60) (Apoptotic protease Mch-3) (CMH-1) (ICE-like apoptotic protease 3) (ICE-LAP3) [Cleaved into: Caspase-7 subunit p20; Caspase-7 subunit p11]	CASP7 MCH3	apoptotic process [GO:0006915]; cellular response to staurosporine [GO:0072734]; execution phase of apoptosis [GO:0097194]; proteolysis [GO:0006508]	K04397;	-0.200421	-0.344827	-0.0603144	-0.100232	0.135617	0.205022	0.126897	0.0572356	0.295164	0.0312122	0.997926	0.417546
CASP8_HUMAN	Q14790	4	Caspase-8 (CASP-8) (EC 3.4.22.61) (Apoptotic cysteine protease) (Apoptotic protease Mch-5) (CAP4) (FADD-homologous ICE/ced-3-like protease) (FADD-like ICE) (FLICE) (ICE-like apoptotic protease 5) (MORT1-associated ced-3 homolog) (MACH) [Cleaved into: Caspase-8 subunit p18; Caspase-8 subunit p10]	CASP8 MCH5	activation of cysteine-type endopeptidase activity [GO:0097202]; activation of cysteine-type endopeptidase activity involved in apoptotic process [GO:0006919]; activation of cysteine-type endopeptidase activity involved in apoptotic signaling pathway [GO:0097296]; apoptotic process [GO:0006915]; apoptotic signaling pathway [GO:0097190]; B cell activation [GO:0042113]; cell surface receptor signal…	K04398;	0.138409	0.20522	0.195922	0.160004	-0.194389	-0.107989	-0.164029	-0.143719	-0.339046	0.0078866	0.981332	0.917429
CATA_HUMAN	P04040	6	Catalase (EC 1.11.1.6)	CAT	aerobic respiration [GO:0009060]; aging [GO:0007568]; cellular response to growth factor stimulus [GO:0071363]; cellular response to oxidative stress [GO:0034599]; cholesterol metabolic process [GO:0008203]; hemoglobin metabolic process [GO:0020027]; hydrogen peroxide catabolic process [GO:0042744]; negative regulation of apoptotic process [GO:0043066]; negative regulation of NF-kappaB transcript…	K03781;	0.0135925	0.0195231	-0.140118	-0.0271699	0.0895552	-0.0128221	0.0302367	-0.104569	0.0381813	0.8013	0.96594	0.662576
CATB_HUMAN	P07858	5	Cathepsin B (EC 3.4.22.1) (APP secretase) (APPS) (Cathepsin B1) [Cleaved into: Cathepsin B light chain; Cathepsin B heavy chain]	CTSB CPSB	cellular response to thyroid hormone stimulus [GO:0097067]; collagen catabolic process [GO:0030574]; decidualization [GO:0046697]; epithelial cell differentiation [GO:0030855]; neutrophil degranulation [GO:0043312]; proteolysis [GO:0006508]; proteolysis involved in cellular protein catabolic process [GO:0051603]; regulation of apoptotic process [GO:0042981]; regulation of catalytic activity [GO:0…	K01363;	-1.1571	-1.17268	-1.10693	-1.25812	0.595377	0.631779	0.615034	0.662441	1.77898	4.87009e-10	0.990919	0.353522
CATC_HUMAN	P53634	2	Dipeptidyl peptidase 1 (EC 3.4.14.1) (Cathepsin C) (Cathepsin J) (Dipeptidyl peptidase I) (DPP-I) (DPPI) (Dipeptidyl transferase) [Cleaved into: Dipeptidyl peptidase 1 exclusion domain chain (Dipeptidyl peptidase I exclusion domain chain); Dipeptidyl peptidase 1 heavy chain (Dipeptidyl peptidase I heavy chain); Dipeptidyl peptidase 1 light chain (Dipeptidyl peptidase I light chain)]	CTSC CPPI	aging [GO:0007568]; COPII vesicle coating [GO:0048208]; ER to Golgi vesicle-mediated transport [GO:0006888]; immune response [GO:0006955]; neutrophil degranulation [GO:0043312]; positive regulation of apoptotic signaling pathway [GO:2001235]; positive regulation of proteolysis involved in cellular protein catabolic process [GO:1903052]; proteolysis [GO:0006508]; proteolysis involved in cellular p…	K01275;	-0.318205	-0.013912	-0.118757	-0.167111	0.269544	0.117262	0.165099	-0.0242639	0.557018	4.73488e-05	0.694032	0.434115
CATD_HUMAN	P07339	15	Cathepsin D (EC 3.4.23.5) [Cleaved into: Cathepsin D light chain; Cathepsin D heavy chain]	CTSD CPSD	antigen processing and presentation of exogenous peptide antigen via MHC class II [GO:0019886]; autophagy [GO:0006914]; collagen catabolic process [GO:0030574]; neutrophil degranulation [GO:0043312]; protein catabolic process [GO:0030163]; proteolysis [GO:0006508]	K01379;	-0.499629	-0.484028	-0.434998	-0.361079	0.410729	0.383888	0.314567	0.261082	0.885828	3.44207e-09	0.981332	0.614618
CATZ_HUMAN	Q9UBR2	3	Cathepsin Z (EC 3.4.18.1) (Cathepsin P) (Cathepsin X)	CTSZ	angiotensin maturation [GO:0002003]; COPII vesicle coating [GO:0048208]; epithelial tube branching involved in lung morphogenesis [GO:0060441]; ER to Golgi vesicle-mediated transport [GO:0006888]; negative regulation of neuron projection development [GO:0010977]; negative regulation of plasminogen activation [GO:0010757]; negative regulation of protein binding [GO:0032091]; neutrophil degranulati…	K08568;	-0.339364	-0.334586	-0.384769	-0.314285	0.346847	0.277043	0.234963	0.160495	0.667646	9.69418e-08	0.808593	0.683912
CAV1_HUMAN	Q03135	5	Caveolin-1	CAV1 CAV	angiogenesis [GO:0001525]; angiotensin-activated signaling pathway involved in heart process [GO:0086098]; apoptotic signaling pathway [GO:0097190]; beta-catenin destruction complex disassembly [GO:1904886]; calcium ion homeostasis [GO:0055074]; calcium ion transport [GO:0006816]; caveola assembly [GO:0070836]; caveolin-mediated endocytosis [GO:0072584]; cellular calcium ion homeostasis [GO:00068…	K06278;	0.162596	0.138397	-0.0463151	-0.0361628	-0.0633635	-0.0757616	-0.0780313	-0.177853	-0.201086	0.0755065	0.96594	0.543642
CAVN1_HUMAN	Q6NZI2	14	Caveolae-associated protein 1 (Cavin-1) (Polymerase I and transcript release factor)	CAVIN1 PTRF FKSG13	positive regulation of cell motility [GO:2000147]; regulation of transcription, DNA-templated [GO:0006355]; rRNA transcription [GO:0009303]; termination of RNA polymerase I transcription [GO:0006363]; transcription initiation from RNA polymerase I promoter [GO:0006361]	K19387;	0.0206354	-0.0248225	-0.0569965	-0.0279102	0.0385012	-0.0425678	0.0219405	-0.0452602	0.00308527	0.960598	0.981332	0.903342
CAZA1_HUMAN	P52907	10	F-actin-capping protein subunit alpha-1 (CapZ alpha-1)	CAPZA1	antigen processing and presentation of exogenous peptide antigen via MHC class II [GO:0019886]; barbed-end actin filament capping [GO:0051016]; blood coagulation [GO:0007596]; cell junction assembly [GO:0034329]; ER to Golgi vesicle-mediated transport [GO:0006888]; innate immune response [GO:0045087]; interleukin-12-mediated signaling pathway [GO:0035722]; protein-containing complex assembly [GO:…	K10364;	-0.0235768	-0.0406896	-0.0201449	0.015448	0.0103675	-0.0158369	0.0749945	-0.0130369	0.0479254	0.38562	0.970538	0.764117
CAZA2_HUMAN	P47755	6	F-actin-capping protein subunit alpha-2 (CapZ alpha-2)	CAPZA2	antigen processing and presentation of exogenous peptide antigen via MHC class II [GO:0019886]; barbed-end actin filament capping [GO:0051016]; blood coagulation [GO:0007596]; ER to Golgi vesicle-mediated transport [GO:0006888]; innate immune response [GO:0045087]; protein-containing complex assembly [GO:0065003]	K10364;	-0.00396562	-0.0568203	-0.0381352	-0.0164231	0.0182085	0.00151403	0.0350701	0.110661	0.00447259	0.947249	0.887151	0.604059
CBL_HUMAN	P22681	3	E3 ubiquitin-protein ligase CBL (EC 2.3.2.27) (Casitas B-lineage lymphoma proto-oncogene) (Proto-oncogene c-Cbl) (RING finger protein 55) (RING-type E3 ubiquitin transferase CBL) (Signal transduction protein CBL)	CBL CBL2 RNF55	cell surface receptor signaling pathway [GO:0007166]; cellular response to DNA damage stimulus [GO:0006974]; cellular response to epidermal growth factor stimulus [GO:0071364]; cellular response to nerve growth factor stimulus [GO:1990090]; cellular response to oxygen-glucose deprivation [GO:0090650]; cellular response to platelet-derived growth factor stimulus [GO:0036120]; cytokine-mediated sig…	K04707;	-0.102469	-0.0304401	0.000896313	0.0986618	-0.0131157	0.00887811	0.0505024	-0.00910222	0.0735951	0.526062	0.999416	0.58566
CBPD_HUMAN	O75976	6	Carboxypeptidase D (EC 3.4.17.22) (Metallocarboxypeptidase D) (gp180)	CPD	peptide metabolic process [GO:0006518]; protein processing [GO:0016485]	K07752;	-0.373421	-0.280311	-0.167963	-0.25731	0.288882	0.281682	0.254249	0.202369	0.609962	3.38463e-05	0.989587	0.771041
CBR1_HUMAN	P16152	11	Carbonyl reductase [NADPH] 1 (EC 1.1.1.184) (15-hydroxyprostaglandin dehydrogenase [NADP(+)]) (EC 1.1.1.197) (NADPH-dependent carbonyl reductase 1) (Prostaglandin 9-ketoreductase) (Prostaglandin-E(2) 9-reductase) (EC 1.1.1.189) (Short chain dehydrogenase/reductase family 21C member 1)	CBR1 CBR CRN SDR21C1	cyclooxygenase pathway [GO:0019371]; drug metabolic process [GO:0017144]; epithelial cell differentiation [GO:0030855]; oxidation-reduction process [GO:0055114]; vitamin K metabolic process [GO:0042373]	K00079;	-0.00488749	-0.0695343	-0.0751042	-0.102831	0.0581405	0.104289	-0.0292666	0.0595109	0.0347213	0.554235	0.978583	0.645874
CBR3_HUMAN	O75828	8	Carbonyl reductase [NADPH] 3 (EC 1.1.1.184) (NADPH-dependent carbonyl reductase 3) (Short chain dehydrogenase/reductase family 21C member 2)	CBR3	cognition [GO:0050890]; phylloquinone catabolic process [GO:0042376]; xenobiotic metabolic process [GO:0006805]	K00084;	-0.215329	-0.257189	-0.204328	-0.209258	0.191259	0.237104	0.113081	0.162185	0.427761	4.64674e-05	0.988285	0.983752
CBX1_HUMAN	P83916	4	Chromobox protein homolog 1 (HP1Hsbeta) (Heterochromatin protein 1 homolog beta) (HP1 beta) (Heterochromatin protein p25) (M31) (Modifier 1 protein) (p25beta)	CBX1 CBX	cellular response to DNA damage stimulus [GO:0006974]; negative regulation of transcription, DNA-templated [GO:0045892]	K11585;	-0.0701556	-0.130006	-0.203417	-0.161444	0.180774	0.143514	0.137605	0.163019	0.244091	0.00514918	0.981332	0.282585
CBX3_HUMAN	Q13185	5	Chromobox protein homolog 3 (HECH) (Heterochromatin protein 1 homolog gamma) (HP1 gamma) (Modifier 2 protein)	CBX3	cellular response to DNA damage stimulus [GO:0006974]; chromatin remodeling [GO:0006338]; negative regulation of G0 to G1 transition [GO:0070317]; negative regulation of transcription, DNA-templated [GO:0045892]; rhythmic process [GO:0048511]; transcription, DNA-templated [GO:0006351]	K11586;	0.0223789	0.0319413	0.0277782	0.0237557	-0.010016	-0.0440425	-0.0643982	-0.0964395	-0.01329	0.854759	0.954578	0.965747
CBX5_HUMAN	P45973	3	Chromobox protein homolog 5 (Antigen p25) (Heterochromatin protein 1 homolog alpha) (HP1 alpha)	CBX5 HP1A	blood coagulation [GO:0007596]; cellular response to DNA damage stimulus [GO:0006974]; negative regulation of G0 to G1 transition [GO:0070317]; negative regulation of transcription, DNA-templated [GO:0045892]; negative regulation of transcription by RNA polymerase II [GO:0000122]; viral process [GO:0016032]	K11587;	-0.334705	-0.308331	-0.355133	-0.365734	0.285295	0.243943	0.257948	0.185161	0.584696	2.01694e-06	0.991772	0.8244
CC124_HUMAN	Q96CT7	5	Coiled-coil domain-containing protein 124	CCDC124	cell cycle [GO:0007049]; cell division [GO:0051301]		0.103897	0.0764607	0.124575	0.0924281	-0.124696	-0.158537	-0.0589794	-0.0872206	-0.25823	0.000806635	0.993272	0.864624
CC134_HUMAN	Q9H6E4	2	Coiled-coil domain-containing protein 134	CCDC134			0.0386332	-0.0062037	0.0109512	-0.118056	0.116351	0.000120877	0.00980099	0.0873721	0.0160668	0.950956	0.988285	0.543971
CCAR1_HUMAN	Q8IX12	11	Cell division cycle and apoptosis regulator protein 1 (Cell cycle and apoptosis regulatory protein 1) (CARP-1) (Death inducer with SAP domain)	CCAR1 CARP1 DIS	apoptotic process [GO:0006915]; cell cycle [GO:0007049]; mRNA splicing, via spliceosome [GO:0000398]; positive regulation of cell migration [GO:0030335]; positive regulation of cell proliferation [GO:0008284]; regulation of transcription, DNA-templated [GO:0006355]; transcription, DNA-templated [GO:0006351]		-0.0065502	-0.00608368	0.0720661	0.0207596	0.00118675	0.0396057	0.0607627	-0.0266543	0.00649075	0.952559	0.981332	0.698665
CCAR2_HUMAN	Q8N163	18	Cell cycle and apoptosis regulator protein 2 (Cell division cycle and apoptosis regulator protein 2) (DBIRD complex subunit KIAA1967) (Deleted in breast cancer gene 1 protein) (DBC-1) (DBC.1) (NET35) (p30 DBC)	CCAR2 DBC1 KIAA1967	cell cycle [GO:0007049]; cellular response to DNA damage stimulus [GO:0006974]; mitochondrial fragmentation involved in apoptotic process [GO:0043653]; mRNA processing [GO:0006397]; negative regulation of catalytic activity [GO:0043086]; negative regulation of cell growth [GO:0030308]; negative regulation of intrinsic apoptotic signaling pathway in response to DNA damage [GO:1902230]; negative re…		-0.0566126	-0.0624403	-0.0663216	-0.0892053	0.0454267	0.0785276	0.0927133	0.0997056	0.117002	0.011237	0.997631	0.970437
CCD12_HUMAN	Q8WUD4	2	Coiled-coil domain-containing protein 12	CCDC12		K12871;	-0.129379	-0.322853	0.104891	0.0649604	-0.0309855	0.147399	-0.263757	0.158589	0.0172359	0.953551	0.957195	0.194046
CCD22_HUMAN	O60826	8	Coiled-coil domain-containing protein 22	CCDC22 CXorf37 JM1	cellular copper ion homeostasis [GO:0006878]; cytoplasmic sequestering of NF-kappaB [GO:0007253]; Golgi to plasma membrane transport [GO:0006893]; negative regulation of I-kappaB kinase/NF-kappaB signaling [GO:0043124]; positive regulation of I-kappaB kinase/NF-kappaB signaling [GO:0043123]; positive regulation of ubiquitin-dependent protein catabolic process [GO:2000060]; post-translational prot…		0.118264	0.0242574	-0.0368419	-0.212181	0.01194	-0.00685278	0.00325685	0.0145955	-0.0323534	0.621217	0.993272	0.443559
CCD25_HUMAN	Q86WR0	2	Coiled-coil domain-containing protein 25	CCDC25			0.423225	0.269062	0.0630668	-0.614633	-0.00662153	0.114541	-1.12822	0.0981297	-0.325961	0.245517	0.211972	0.209535
CCD47_HUMAN	Q96A33	9	Coiled-coil domain-containing protein 47	CCDC47 GK001 MSTP041 PSEC0077	calcium ion homeostasis [GO:0055074]; endoplasmic reticulum organization [GO:0007029]; ER overload response [GO:0006983]; osteoblast differentiation [GO:0001649]; post-embryonic development [GO:0009791]; ubiquitin-dependent ERAD pathway [GO:0030433]		0.154165	0.155717	0.137394	0.125316	-0.250796	-0.111739	-0.146806	-0.0740405	-0.414143	9.49862e-07	0.761667	0.682967
CCD50_HUMAN	Q8IVM0	2	Coiled-coil domain-containing protein 50 (Protein Ymer)	CCDC50 C3orf6	sensory perception of sound [GO:0007605]		0.162538	0.186112	0.175998	0.189357	-0.40375	-0.259727	-0.134529	-0.157077	-0.511451	0.00115419	0.954578	0.820367
CCD58_HUMAN	Q4VC31	4	Coiled-coil domain-containing protein 58	CCDC58			-0.0395493	0.0303463	-0.0686353	-0.141821	0.0536368	0.0335145	0.0039207	0.00489538	0.100465	0.14538	0.99334	0.872219
CCD86_HUMAN	Q9H6F5	3	Coiled-coil domain-containing protein 86 (Cytokine-induced protein with coiled-coil domain)	CCDC86 CYCLON	viral process [GO:0016032]	K14822;	0.102816	-0.0229737	0.18367	0.0450857	-0.0865331	-0.567498	-0.019645	-0.0316447	-0.111219	0.618115	0.483123	0.820367
CCDC6_HUMAN	Q16204	10	Coiled-coil domain-containing protein 6 (Papillary thyroid carcinoma-encoded protein) (Protein H4)	CCDC6 D10S170 TST1		K09288;	0.100733	0.107149	0.0443089	-0.0635621	-0.0398975	-0.143978	-0.0896353	-0.112372	-0.162626	0.0319736	0.988285	0.400657
CCDC9_HUMAN	Q9Y3X0	4	Coiled-coil domain-containing protein 9	CCDC9			-0.281346	-0.199914	-0.248946	-0.287437	0.171421	0.217445	0.17355	0.210408	0.464694	1.96825e-05	0.999416	0.909905
CCHL_HUMAN	P53701	2	Cytochrome c-type heme lyase (CCHL) (EC 4.4.1.17) (Holocytochrome c-type synthase)	HCCS CCHL	animal organ morphogenesis [GO:0009887]; cytochrome c-heme linkage [GO:0018063]; oxidation-reduction process [GO:0055114]	K01764;	0.192907	-0.0973626	0.121434	0.156628	-0.108884	-0.0174193	-0.167211	-0.149279	-0.350812	0.00246612	0.734107	0.571489
CCNB1_HUMAN	P14635	3	G2/mitotic-specific cyclin-B1	CCNB1 CCNB	anaphase-promoting complex-dependent catabolic process [GO:0031145]; cell division [GO:0051301]; cellular response to fatty acid [GO:0071398]; cellular response to hypoxia [GO:0071456]; cellular response to iron(III) ion [GO:0071283]; cellular response to organic cyclic compound [GO:0071407]; digestive tract development [GO:0048565]; DNA damage response, signal transduction by p53 class mediator …	K05868;	0.0278949	0.153748	0.209879	0.122841	-0.264268	-0.233174	-0.0996863	-0.0336543	-0.297638	0.148287	0.981332	0.690989
CCNK_HUMAN	O75909	4	Cyclin-K	CCNK CPR4	cell cycle [GO:0007049]; cell division [GO:0051301]; cellular response to DNA damage stimulus [GO:0006974]; negative regulation by host of viral genome replication [GO:0044828]; negative regulation of cell cycle arrest [GO:0071157]; positive regulation of cyclin-dependent protein serine/threonine kinase activity [GO:0045737]; positive regulation of phosphorylation of RNA polymerase II C-terminal …		-0.0216841	-0.109735	-0.135662	-0.0689685	-0.00197476	0.0903522	0.177152	0.0667147	0.0344859	0.793961	0.988285	0.866166
CCS_HUMAN	O14618	7	Copper chaperone for superoxide dismutase (Superoxide dismutase copper chaperone)	CCS	cellular response to oxidative stress [GO:0034599]; intracellular copper ion transport [GO:0015680]; positive regulation of oxidoreductase activity [GO:0051353]; superoxide metabolic process [GO:0006801]	K04569;	-0.191491	-0.188247	-0.349209	-0.287286	0.231348	0.198286	0.203169	0.127331	0.394857	0.00132825	0.981332	0.411304
CD109_HUMAN	Q6YHK3	28	CD109 antigen (150 kDa TGF-beta-1-binding protein) (C3 and PZP-like alpha-2-macroglobulin domain-containing protein 7) (Platelet-specific Gov antigen) (p180) (r150) (CD antigen CD109)	CD109 CPAMD7	hair follicle development [GO:0001942]; negative regulation of keratinocyte proliferation [GO:0010839]; negative regulation of protein phosphorylation [GO:0001933]; negative regulation of transforming growth factor beta receptor signaling pathway [GO:0030512]; negative regulation of wound healing [GO:0061045]; osteoclast fusion [GO:0072675]; platelet degranulation [GO:0002576]; regulation of kera…	K06530;	-0.759193	-0.795669	-0.827024	-0.83851	0.52071	0.511923	0.456503	0.418806	1.22408	2.24708e-08	0.957264	0.94478
CD276_HUMAN	Q5ZPR3	2	CD276 antigen (4Ig-B7-H3) (B7 homolog 3) (B7-H3) (Costimulatory molecule) (CD antigen CD276)	CD276 B7H3 PSEC0249 UNQ309/PRO352	cell proliferation [GO:0008283]; immune response [GO:0006955]; positive regulation of interferon-gamma biosynthetic process [GO:0045078]; positive regulation of T cell proliferation [GO:0042102]; regulation of immune response [GO:0050776]; T cell activation [GO:0042110]	K06746;	-0.019912	0.0630889	0.0161032	0.0436252	-0.0461804	0.0224272	-0.00399753	-0.0587	-0.0368814	0.51443	0.92875	0.826626
CD2AP_HUMAN	Q9Y5K6	9	CD2-associated protein (Adapter protein CMS) (Cas ligand with multiple SH3 domains)	CD2AP	actin filament organization [GO:0007015]; cell-cell adhesion [GO:0098609]; cell cycle [GO:0007049]; cell division [GO:0051301]; negative regulation of small GTPase mediated signal transduction [GO:0051058]; negative regulation of transforming growth factor beta1 production [GO:0032911]; positive regulation of protein localization to nucleus [GO:1900182]; proteasome-mediated ubiquitin-dependent pr…	K13738;	-0.0890948	-0.0113948	-0.0661261	-0.14119	0.0968647	0.10526	0.0429689	-0.00152406	0.211778	0.0124308	0.978908	0.764334
CD2B2_HUMAN	O95400	4	CD2 antigen cytoplasmic tail-binding protein 2 (CD2 cytoplasmic domain-binding protein 2) (CD2 tail-binding protein 2) (U5 snRNP 52K protein) (U5-52K)	CD2BP2 KIAA1178	mRNA splicing, via spliceosome [GO:0000398]; negative regulation of phosphatase activity [GO:0010923]; spliceosomal tri-snRNP complex assembly [GO:0000244]	K13099;	-0.00343507	0.0487791	0.0053059	0.033576	-0.0699295	-0.00441818	-0.0581138	-0.0128165	-0.0511956	0.365281	0.981332	0.899021
CD44_HUMAN	P16070	4	CD44 antigen (CDw44) (Epican) (Extracellular matrix receptor III) (ECMR-III) (GP90 lymphocyte homing/adhesion receptor) (HUTCH-I) (Heparan sulfate proteoglycan) (Hermes antigen) (Hyaluronate receptor) (Phagocytic glycoprotein 1) (PGP-1) (Phagocytic glycoprotein I) (PGP-I) (CD antigen CD44)	CD44 LHR MDU2 MDU3 MIC4	cartilage development [GO:0051216]; cell-cell adhesion [GO:0098609]; cell-matrix adhesion [GO:0007160]; cellular response to fibroblast growth factor stimulus [GO:0044344]; extracellular matrix disassembly [GO:0022617]; extracellular matrix organization [GO:0030198]; hyaluronan catabolic process [GO:0030214]; interferon-gamma-mediated signaling pathway [GO:0060333]; leukocyte migration [GO:005090…	K06256;	-0.00443344	0.0500357	0.00627391	0.0317576	0.00400712	-0.0881959	-0.0627584	-0.0630595	-0.0365318	0.698925	0.936547	0.978133
CD47_HUMAN	Q08722	3	Leukocyte surface antigen CD47 (Antigenic surface determinant protein OA3) (Integrin-associated protein) (IAP) (Protein MER6) (CD antigen CD47)	CD47 MER6	cell adhesion [GO:0007155]; extracellular matrix organization [GO:0030198]; integrin-mediated signaling pathway [GO:0007229]; leukocyte migration [GO:0050900]; neutrophil degranulation [GO:0043312]; opsonization [GO:0008228]; positive regulation of cell-cell adhesion [GO:0022409]; positive regulation of cell proliferation [GO:0008284]; positive regulation of inflammatory response [GO:0050729]; po…	K06266;	-0.826173	-0.864217	-0.896686	-0.707405	0.5342	0.513625	0.449341	0.547855	1.3508	3.74199e-09	0.988285	0.629996
CD82_HUMAN	P27701	2	CD82 antigen (C33 antigen) (IA4) (Inducible membrane protein R2) (Metastasis suppressor Kangai-1) (Suppressor of tumorigenicity 6 protein) (Tetraspanin-27) (Tspan-27) (CD antigen CD82)	CD82 KAI1 SAR2 ST6 TSPAN27	cell surface receptor signaling pathway [GO:0007166]	K06509;	-0.597872	-0.573379	-0.501509	-0.47461	0.501849	0.294888	0.377003	0.344801	0.97068	1.22131e-06	0.998354	0.698665
CD9_HUMAN	P21926	4	CD9 antigen (5H9 antigen) (Cell growth-inhibiting gene 2 protein) (Leukocyte antigen MIC3) (Motility-related protein) (MRP-1) (Tetraspanin-29) (Tspan-29) (p24) (CD antigen CD9)	CD9 MIC3 TSPAN29 GIG2	brain development [GO:0007420]; cell adhesion [GO:0007155]; cell surface receptor signaling pathway [GO:0007166]; cellular response to low-density lipoprotein particle stimulus [GO:0071404]; fusion of sperm to egg plasma membrane involved in single fertilization [GO:0007342]; negative regulation of cell proliferation [GO:0008285]; negative regulation of cellular component movement [GO:0051271]; n…	K06460;	-0.34105	-0.371029	-0.378095	-0.422276	0.372757	0.284198	0.293979	0.244286	0.708201	3.59597e-08	0.981332	0.770237
CD97_HUMAN	P48960	4	CD97 antigen (Leukocyte antigen CD97) (CD antigen CD97) [Cleaved into: CD97 antigen subunit alpha; CD97 antigen subunit beta]	CD97	cell adhesion [GO:0007155]; cell-cell signaling [GO:0007267]; cell surface receptor signaling pathway [GO:0007166]; G-protein coupled receptor signaling pathway [GO:0007186]; immune response [GO:0006955]; inflammatory response [GO:0006954]; neutrophil degranulation [GO:0043312]	K08446;	0.29859	0.366482	0.234232	0.262046	-0.409647	-0.399189	-0.374858	-0.353377	-0.717212	1.14479e-07	0.993272	0.645238
CD99_HUMAN	P14209	2	CD99 antigen (12E7) (E2 antigen) (Protein MIC2) (T-cell surface glycoprotein E2) (CD antigen CD99)	CD99 MIC2 MIC2X MIC2Y	cell adhesion [GO:0007155]; regulation of immune response [GO:0050776]	K06520;	-0.375892	-0.766198	-0.246679	-0.125044	0.429155	0.280234	0.317656	0.218877	0.859733	1.25986e-05	0.92875	0.189502
CDC16_HUMAN	Q13042	3	Cell division cycle protein 16 homolog (Anaphase-promoting complex subunit 6) (APC6) (CDC16 homolog) (CDC16Hs) (Cyclosome subunit 6)	CDC16 ANAPC6	anaphase-promoting complex-dependent catabolic process [GO:0031145]; cell division [GO:0051301]; cell proliferation [GO:0008283]; mitotic cell cycle [GO:0000278]; protein K11-linked ubiquitination [GO:0070979]; regulation of mitotic nuclear division [GO:0007088]	K03353;	-0.0602177	0.0147625	0.081686	0.116663	-0.0617607	0.036835	-0.0871194	-0.146819	-0.00800231	0.939325	0.957195	0.682885
CDC20_HUMAN	Q12834	2	Cell division cycle protein 20 homolog (p55CDC)	CDC20	anaphase-promoting complex-dependent catabolic process [GO:0031145]; cell division [GO:0051301]; mitotic sister chromatid cohesion [GO:0007064]; mitotic spindle assembly [GO:0090307]; mitotic spindle assembly checkpoint [GO:0007094]; positive regulation of cell proliferation [GO:0008284]; positive regulation of synapse maturation [GO:0090129]; positive regulation of synaptic plasticity [GO:003191…	K03363;	0.325365	-0.0796352	0.202335	0.398492	-0.329812	-0.399394	-0.760427	-0.0676108	-0.805945	0.015448	0.92875	0.405055
CDC23_HUMAN	Q9UJX2	7	Cell division cycle protein 23 homolog (Anaphase-promoting complex subunit 8) (APC8) (Cyclosome subunit 8)	CDC23 ANAPC8	anaphase-promoting complex-dependent catabolic process [GO:0031145]; cell division [GO:0051301]; metaphase/anaphase transition of mitotic cell cycle [GO:0007091]; mitotic cell cycle [GO:0000278]; mitotic metaphase plate congression [GO:0007080]; protein K11-linked ubiquitination [GO:0070979]; regulation of exit from mitosis [GO:0007096]; regulation of mitotic metaphase/anaphase transition [GO:003…	K03355;	-0.0299261	-0.0218277	0.0538956	0.0660933	-0.00492055	-0.0171153	-0.0182932	-0.068431	0.0139985	0.830984	0.997631	0.604059
CDC27_HUMAN	P30260	2	Cell division cycle protein 27 homolog (Anaphase-promoting complex subunit 3) (APC3) (CDC27 homolog) (CDC27Hs) (H-NUC)	CDC27 ANAPC3 D0S1430E D17S978E	anaphase-promoting complex-dependent catabolic process [GO:0031145]; cell proliferation [GO:0008283]; metaphase/anaphase transition of mitotic cell cycle [GO:0007091]; protein K11-linked ubiquitination [GO:0070979]	K03350;	0.157583	-0.0437767	-0.0785204	-0.00976429	0.00701878	-0.0457852	-0.106908	0.0659323	-0.164025	0.103014	0.972686	0.732632
CDC37_HUMAN	Q16543	11	Hsp90 co-chaperone Cdc37 (Hsp90 chaperone protein kinase-targeting subunit) (p50Cdc37) [Cleaved into: Hsp90 co-chaperone Cdc37, N-terminally processed]	CDC37 CDC37A	ERBB2 signaling pathway [GO:0038128]; positive regulation of mitophagy in response to mitochondrial depolarization [GO:0098779]; posttranscriptional regulation of gene expression [GO:0010608]; protein folding [GO:0006457]; protein stabilization [GO:0050821]; protein targeting [GO:0006605]; regulation of cyclin-dependent protein serine/threonine kinase activity [GO:0000079]; regulation of interfer…	K09554;	0.152658	0.162267	0.101855	0.105754	-0.137468	-0.163534	-0.1892	-0.0677385	-0.280304	8.08543e-06	0.908738	0.646768
CDC42_HUMAN	P60953	4	Cell division control protein 42 homolog (G25K GTP-binding protein)	CDC42	actin cytoskeleton organization [GO:0030036]; actin filament branching [GO:0090135]; actin filament bundle assembly [GO:0051017]; actin filament organization [GO:0007015]; adherens junction organization [GO:0034332]; blood coagulation [GO:0007596]; canonical Wnt signaling pathway [GO:0060070]; cardiac conduction system development [GO:0003161]; Cdc42 protein signal transduction [GO:0032488]; cell…	K04393;	-0.10537	-0.156627	-0.047121	-0.064652	0.067946	0.0332027	0.0687677	0.00672211	0.165232	0.0768369	0.997926	0.787613
CDC45_HUMAN	O75419	3	Cell division control protein 45 homolog (PORC-PI-1)	CDC45 CDC45L CDC45L2 UNQ374/PRO710	DNA replication [GO:0006260]; DNA replication checkpoint [GO:0000076]; DNA replication initiation [GO:0006270]; double-strand break repair via break-induced replication [GO:0000727]; G1/S transition of mitotic cell cycle [GO:0000082]; mitotic DNA replication preinitiation complex assembly [GO:1902977]; positive regulation of G1/S transition of mitotic cell cycle [GO:1900087]; pre-replicative comp…	K06628;	0.115984	0.0696123	0.234129	0.254044	-0.149804	-0.0872141	-0.10118	-0.188954	-0.251769	0.0572699	0.936547	0.658938
CDC5L_HUMAN	Q99459	22	Cell division cycle 5-like protein (Cdc5-like protein) (Pombe cdc5-related protein)	CDC5L KIAA0432 PCDC5RP	cell differentiation [GO:0030154]; cellular response to fibroblast growth factor stimulus [GO:0044344]; cellular response to interleukin-2 [GO:0071352]; cellular response to nerve growth factor stimulus [GO:1990090]; cellular response to prolactin [GO:1990646]; cellular response to wortmannin [GO:1904568]; DNA repair [GO:0006281]; mitotic cell cycle [GO:0000278]; mRNA splicing, via spliceosome [G…	K12860;	-0.0799463	-0.08945	-0.0402873	-0.0465874	0.0375073	0.0676904	0.0715175	0.0692508	0.127847	0.0211847	0.988285	0.833208
CDC73_HUMAN	Q6P1J9	11	Parafibromin (Cell division cycle protein 73 homolog) (Hyperparathyroidism 2 protein)	CDC73 C1orf28 HRPT2	beta-catenin-TCF complex assembly [GO:1904837]; cell cycle [GO:0007049]; cellular response to lipopolysaccharide [GO:0071222]; endodermal cell fate commitment [GO:0001711]; histone H2B ubiquitination [GO:0033523]; histone monoubiquitination [GO:0010390]; mRNA polyadenylation [GO:0006378]; negative regulation of apoptotic process [GO:0043066]; negative regulation of cell proliferation [GO:0008285]…	K15175;	-0.0309611	-0.0516746	0.0409225	0.0588008	0.0482645	0.00681496	0.0218859	-0.00630108	0.0675121	0.17768	0.981332	0.43537
CDCP1_HUMAN	Q9H5V8	2	CUB domain-containing protein 1 (Membrane glycoprotein gp140) (Subtractive immunization M plus HEp3-associated 135 kDa protein) (SIMA135) (Transmembrane and associated with src kinases) (CD antigen CD318)	CDCP1 TRASK UNQ2486/PRO5773		K06732;	-0.339595	-0.430807	-0.29124	-0.605174	0.365721	0.322356	0.237146	0.245491	0.703536	1.14381e-06	0.989587	0.419898
CDIPT_HUMAN	O14735	4	CDP-diacylglycerol--inositol 3-phosphatidyltransferase (EC 2.7.8.11) (Phosphatidylinositol synthase) (PI synthase) (PtdIns synthase)	CDIPT PIS PIS1	CDP-diacylglycerol metabolic process [GO:0046341]; phosphatidylinositol biosynthetic process [GO:0006661]	K00999;	-0.404493	-0.360381	-0.304401	-0.403655	0.309994	0.274464	0.275061	0.291512	0.644029	4.0162e-06	0.999413	0.804568
CDK1_HUMAN	P06493	11	Cyclin-dependent kinase 1 (CDK1) (EC 2.7.11.22) (EC 2.7.11.23) (Cell division control protein 2 homolog) (Cell division protein kinase 1) (p34 protein kinase)	CDK1 CDC2 CDC28A CDKN1 P34CDC2	activation of MAPK activity [GO:0000187]; anaphase-promoting complex-dependent catabolic process [GO:0031145]; animal organ regeneration [GO:0031100]; apoptotic process [GO:0006915]; cell aging [GO:0007569]; cell division [GO:0051301]; cell migration [GO:0016477]; cell proliferation [GO:0008283]; cellular response to hydrogen peroxide [GO:0070301]; centrosome cycle [GO:0007098]; chromosome conden…	K02087;	0.115799	0.0159255	0.0877546	0.0799229	-0.127859	-0.0832409	-0.0576798	0.0181762	-0.234485	0.00689356	0.85626	0.896573
CDK2_HUMAN	P24941	8	Cyclin-dependent kinase 2 (EC 2.7.11.22) (Cell division protein kinase 2) (p33 protein kinase)	CDK2 CDKN2	anaphase-promoting complex-dependent catabolic process [GO:0031145]; cell division [GO:0051301]; cellular response to nitric oxide [GO:0071732]; centriole replication [GO:0007099]; centrosome duplication [GO:0051298]; DNA damage response, signal transduction by p53 class mediator resulting in cell cycle arrest [GO:0006977]; DNA repair [GO:0006281]; DNA replication [GO:0006260]; G1/S transition of…	K02206;	-0.100303	-0.137208	-0.215086	-0.0195007	0.0363187	0.0929538	0.0942538	0.165161	0.146523	0.0932705	0.988285	0.645238
CDK5_HUMAN	Q00535	7	Cyclin-dependent-like kinase 5 (EC 2.7.11.1) (Cell division protein kinase 5) (Serine/threonine-protein kinase PSSALRE) (Tau protein kinase II catalytic subunit) (TPKII catalytic subunit)	CDK5 CDKN5	axon extension [GO:0048675]; behavioral response to cocaine [GO:0048148]; calcium ion import [GO:0070509]; cell cycle [GO:0007049]; cell division [GO:0051301]; cell-matrix adhesion [GO:0007160]; cell proliferation [GO:0008283]; cellular response to amyloid-beta [GO:1904646]; central nervous system neuron development [GO:0021954]; cerebellar cortex formation [GO:0021697]; chemical synaptic transmi…	K02090;	0.0280789	0.00050073	0.0889697	0.0434343	0.0811997	0.0501116	0.0250844	-0.0328207	-0.00441345	0.956318	0.989587	0.690989
CDK6_HUMAN	Q00534	3	Cyclin-dependent kinase 6 (EC 2.7.11.22) (Cell division protein kinase 6) (Serine/threonine-protein kinase PLSTIRE)	CDK6 CDKN6	astrocyte development [GO:0014002]; cell cycle arrest [GO:0007050]; cell dedifferentiation [GO:0043697]; cell division [GO:0051301]; dentate gyrus development [GO:0021542]; G1/S transition of mitotic cell cycle [GO:0000082]; generation of neurons [GO:0048699]; gliogenesis [GO:0042063]; lateral ventricle development [GO:0021670]; negative regulation of cell cycle [GO:0045786]; negative regulation …	K02091;	0.511159	0.671992	0.553523	0.524555	-0.867599	-0.728025	-0.982698	-0.88281	-1.50238	1.8646e-05	0.936547	0.433993
CDK9_HUMAN	P50750	2	Cyclin-dependent kinase 9 (EC 2.7.11.22) (EC 2.7.11.23) (C-2K) (Cell division cycle 2-like protein kinase 4) (Cell division protein kinase 9) (Serine/threonine-protein kinase PITALRE) (Tat-associated kinase complex catalytic subunit)	CDK9 CDC2L4 TAK	cell proliferation [GO:0008283]; cellular response to cytokine stimulus [GO:0071345]; DNA repair [GO:0006281]; negative regulation of cell cycle arrest [GO:0071157]; negative regulation of mRNA polyadenylation [GO:1900364]; phosphorylation of RNA polymerase II C-terminal domain [GO:0070816]; positive regulation of cardiac muscle hypertrophy [GO:0010613]; positive regulation of histone H2B ubiquit…	K02211;	-0.316688	-0.22035	-0.230732	0.0703124	0.0228215	0.138902	-0.0921084	0.355518	0.183827	0.320148	0.915082	0.338334
CDN2A_HUMAN	P42771	5	Cyclin-dependent kinase inhibitor 2A (Cyclin-dependent kinase 4 inhibitor A) (CDK4I) (Multiple tumor suppressor 1) (MTS-1) (p16-INK4a) (p16-INK4) (p16INK4A)	CDKN2A CDKN2 MTS1	cell cycle arrest [GO:0007050]; cellular senescence [GO:0090398]; G1/S transition of mitotic cell cycle [GO:0000082]; negative regulation of cell growth [GO:0030308]; negative regulation of cell-matrix adhesion [GO:0001953]; negative regulation of cell proliferation [GO:0008285]; negative regulation of cyclin-dependent protein serine/threonine kinase activity [GO:0045736]; negative regulation of …	K06621;	0.0920437	0.356708	0.279869	0.217661	-0.363647	-0.366253	-0.307236	-0.278323	-0.483844	1.22539e-06	0.970538	0.427406
CDV3_HUMAN	Q9UKY7	11	Protein CDV3 homolog	CDV3 H41	cell proliferation [GO:0008283]		0.234537	0.265333	0.216161	0.282359	-0.232924	-0.29072	-0.292223	-0.260269	-0.482443	4.64105e-07	0.988285	0.873519
CDYL_HUMAN	Q9Y232	2	Chromodomain Y-like protein (CDY-like) (Crotonyl-CoA hydratase) (EC 4.2.1.-)	CDYL CDYL1	negative regulation of peptidyl-lysine crotonylation [GO:0120094]; random inactivation of X chromosome [GO:0060816]; regulation of transcription, DNA-templated [GO:0006355]; spermatid development [GO:0007286]; spermatogenesis [GO:0007283]; transcription, DNA-templated [GO:0006351]	K00653;	-0.0588131	-0.0514474	-0.0291688	-0.0459017	0.0789971	0.0733692	0.0507906	-0.0234744	0.121759	0.267259	0.968604	0.963024
CE022_HUMAN	Q49AR2	4	UPF0489 protein C5orf22	C5orf22			0.0532695	0.103458	0.0256558	0.224051	-0.135117	-0.179693	-0.137271	0.0473908	-0.148668	0.159747	0.841996	0.419898
CE170_HUMAN	Q5SW79	3	Centrosomal protein of 170 kDa (Cep170) (KARP-1-binding protein) (KARP1-binding protein)	CEP170 FAM68A KAB KIAA0470		K16463;	0.260806	0.152374	0.180621	0.209498	-0.263887	-0.213678	-0.256065	-0.331992	-0.54585	5.38102e-05	0.915082	0.866166
CEBPZ_HUMAN	Q03701	5	CCAAT/enhancer-binding protein zeta (CCAAT-box-binding transcription factor) (CBF) (CCAAT-binding factor)	CEBPZ CBF2	positive regulation of transcription by RNA polymerase II [GO:0045944]; transcription by RNA polymerase II [GO:0006366]	K14832;	0.226053	0.135294	0.257626	0.173622	-0.231366	-0.233298	-0.18275	-0.299844	-0.495151	0.000153067	0.989587	0.53435
CELF1_HUMAN	Q92879	2	CUGBP Elav-like family member 1 (CELF-1) (50 kDa nuclear polyadenylated RNA-binding protein) (Bruno-like protein 2) (CUG triplet repeat RNA-binding protein 1) (CUG-BP1) (CUG-BP- and ETR-3-like factor 1) (Deadenylation factor CUG-BP) (Embryo deadenylation element-binding protein homolog) (EDEN-BP homolog) (RNA-binding protein BRUNOL-2)	CELF1 BRUNOL2 CUGBP CUGBP1 NAB50	embryo development ending in birth or egg hatching [GO:0009792]; germ cell development [GO:0007281]; mRNA processing [GO:0006397]; mRNA splice site selection [GO:0006376]; regulation of RNA splicing [GO:0043484]; RNA interference [GO:0016246]	K13207;	0.0786099	0.149051	0.101175	0.0841053	-0.0302058	-0.113855	-0.182362	-0.1748	-0.14232	0.0939904	0.957264	0.900335
CENPF_HUMAN	P49454	2	Centromere protein F (CENP-F) (AH antigen) (Kinetochore protein CENPF) (Mitosin)	CENPF	cell differentiation [GO:0030154]; cell division [GO:0051301]; cell proliferation [GO:0008283]; chromosome segregation [GO:0007059]; DNA biosynthetic process [GO:0071897]; kidney development [GO:0001822]; kinetochore assembly [GO:0051382]; metaphase plate congression [GO:0051310]; mitotic cell cycle [GO:0000278]; mitotic spindle assembly checkpoint [GO:0007094]; muscle organ development [GO:00075…	K11499;	-0.106379	0.0236084	0.185654	0.164485	-0.0341547	-0.151221	-0.0144377	0.000442799	0.0151421	0.903052	0.868573	0.458781
CERS2_HUMAN	Q96G23	3	Ceramide synthase 2 (CerS2) (LAG1 longevity assurance homolog 2) (SP260) (Tumor metastasis-suppressor gene 1 protein)	CERS2 LASS2 TMSG1	ceramide biosynthetic process [GO:0046513]; negative regulation of axon regeneration [GO:0048681]; negative regulation of Schwann cell migration [GO:1900148]; negative regulation of Schwann cell proliferation involved in axon regeneration [GO:1905045]; sphingolipid biosynthetic process [GO:0030148]	K04710;	-0.0732389	-0.106834	0.026223	-0.0110249	0.0787758	-0.0261443	0.0391674	-0.187607	0.0960643	0.465779	0.954578	0.813563
CETN2_HUMAN	P41208	3	Centrin-2 (Caltractin isoform 1)	CETN2 CALT CEN2	cell division [GO:0051301]; centriole replication [GO:0007099]; ciliary basal body-plasma membrane docking [GO:0097711]; G2/M transition of mitotic cell cycle [GO:0000086]; global genome nucleotide-excision repair [GO:0070911]; mitotic cell cycle [GO:0000278]; nucleotide-excision repair [GO:0006289]; nucleotide-excision repair, DNA damage recognition [GO:0000715]; nucleotide-excision repair, prei…	K10840;	-0.233079	-0.274383	-0.298306	-0.191323	0.141882	0.172889	0.163247	0.279931	0.356204	0.00226183	0.978908	0.704469
CFA20_HUMAN	Q9Y6A4	2	Cilia- and flagella-associated protein 20 (Basal body up-regulated protein 22) (Transcription factor IIB)	CFAP20 BUG22 C16orf80 GTL3	cilium assembly [GO:0060271]; multicellular organism development [GO:0007275]; positive regulation of cell motility [GO:2000147]; positive regulation of feeding behavior [GO:2000253]; protein polyglutamylation [GO:0018095]; regulation of cilium beat frequency involved in ciliary motility [GO:0060296]		-0.282932	-0.397212	-0.141903	-0.343319	0.22626	0.184171	0.191706	0.271165	0.423863	0.0670521	0.997926	0.857954
CFDP1_HUMAN	Q9UEE9	2	Craniofacial development protein 1 (Bucentaur)	CFDP1 BCNT CENP-29	cell adhesion [GO:0007155]; multicellular organism development [GO:0007275]; negative regulation of fibroblast apoptotic process [GO:2000270]; regulation of cell proliferation [GO:0042127]; regulation of cell shape [GO:0008360]		-0.201098	-0.401694	-0.32925	-0.332006	0.2494	0.28337	0.221451	0.222454	0.424848	0.000149525	0.992137	0.214113
CG050_HUMAN	Q9BRJ6	4	Uncharacterized protein C7orf50	C7orf50 FP15621			0.221048	0.16273	0.147789	0.20698	-0.209062	-0.229731	-0.20233	-0.135088	-0.421894	2.38555e-05	0.966567	0.698665
CGBP1_HUMAN	Q9UFW8	6	CGG triplet repeat-binding protein 1 (CGG-binding protein 1) (20 kDa CGG-binding protein) (p20-CGGBP DNA-binding protein)	CGGBP1 CGGBP	negative regulation of transcription by RNA polymerase II [GO:0000122]; transcription, DNA-templated [GO:0006351]		-0.260178	-0.318218	-0.337051	-0.294124	0.358309	0.252372	0.207303	0.15046	0.569576	2.1975e-06	0.915082	0.92323
CGL_HUMAN	P32929	8	Cystathionine gamma-lyase (EC 4.4.1.1) (Cysteine-protein sulfhydrase) (Gamma-cystathionase)	CTH	'de novo' L-methionine biosynthetic process [GO:0071266]; cellular response to leukemia inhibitory factor [GO:1990830]; cysteine biosynthetic process [GO:0019344]; cysteine biosynthetic process via cystathionine [GO:0019343]; cysteine metabolic process [GO:0006534]; endoplasmic reticulum unfolded protein response [GO:0030968]; hydrogen sulfide biosynthetic process [GO:0070814]; negative regulatio…	K01758;	0.0877545	0.0403828	0.0275387	0.0769965	-0.040049	-0.164868	-0.0410257	-0.158172	-0.120613	0.107596	0.981332	0.958165
CH033_HUMAN	Q9H7E9	2	UPF0488 protein C8orf33	C8orf33			0.275546	0.196198	0.373877	0.274278	-0.329395	-0.327562	-0.417055	-0.303228	-0.620007	0.000717275	0.981332	0.791285
CH10_HUMAN	P61604	9	10 kDa heat shock protein, mitochondrial (Hsp10) (10 kDa chaperonin) (Chaperonin 10) (CPN10) (Early-pregnancy factor) (EPF)	HSPE1	activation of cysteine-type endopeptidase activity involved in apoptotic process [GO:0006919]; chaperone cofactor-dependent protein refolding [GO:0051085]; osteoblast differentiation [GO:0001649]; protein folding [GO:0006457]; response to unfolded protein [GO:0006986]	K04078;	0.252555	0.193137	0.211093	0.1485	-0.21096	-0.271089	-0.254759	-0.248413	-0.463727	9.37438e-08	0.989587	0.434014
CH60_HUMAN	P10809	37	60 kDa heat shock protein, mitochondrial (EC 3.6.4.9) (60 kDa chaperonin) (Chaperonin 60) (CPN60) (Heat shock protein 60) (HSP-60) (Hsp60) (HuCHA60) (Mitochondrial matrix protein P1) (P60 lymphocyte protein)	HSPD1 HSP60	'de novo' protein folding [GO:0006458]; activation of cysteine-type endopeptidase activity involved in apoptotic process [GO:0006919]; apoptotic mitochondrial changes [GO:0008637]; B cell activation [GO:0042113]; B cell cytokine production [GO:0002368]; B cell proliferation [GO:0042100]; chaperone-mediated protein complex assembly [GO:0051131]; chaperone-mediated protein folding [GO:0061077]; int…	K04077;	0.272599	0.292779	0.278187	0.225609	-0.30991	-0.392529	-0.327513	-0.343699	-0.544513	2.21182e-07	0.936547	0.866269
CHAP1_HUMAN	Q96JM3	3	Chromosome alignment-maintaining phosphoprotein 1 (Zinc finger protein 828)	CHAMP1 C13orf8 CAMP CHAMP KIAA1802 ZNF828	attachment of mitotic spindle microtubules to kinetochore [GO:0051315]; protein localization to kinetochore [GO:0034501]; protein localization to microtubule [GO:0035372]; sister chromatid biorientation [GO:0031134]	K22593;	-0.253258	-0.13051	-0.23754	-0.177552	0.196678	0.209747	0.322687	0.131756	0.508848	0.00163038	0.85626	0.945285
CHCH2_HUMAN	Q9Y6H1	2	Coiled-coil-helix-coiled-coil-helix domain-containing protein 2 (Aging-associated gene 10 protein) (HCV NS2 trans-regulated protein) (NS2TP)	CHCHD2 C7orf17 AAG10	mitochondrion organization [GO:0007005]; positive regulation of transcription by RNA polymerase II [GO:0045944]; regulation of cellular response to hypoxia [GO:1900037]; transcription, DNA-templated [GO:0006351]	K22758;	-0.184339	-0.29182	-0.0818685	0.0884068	0.161626	0.0942765	0.0906952	0.0643894	0.465332	0.023473	0.993272	0.405055
CHD1_HUMAN	O14646	3	Chromodomain-helicase-DNA-binding protein 1 (CHD-1) (EC 3.6.4.12) (ATP-dependent helicase CHD1)	CHD1	chromatin remodeling [GO:0006338]; covalent chromatin modification [GO:0016569]; positive regulation by host of viral transcription [GO:0043923]; regulation of transcription by RNA polymerase II [GO:0006357]; transcription, DNA-templated [GO:0006351]	K11367;	0.00895882	-0.00537538	0.226021	0.165996	-0.496447	-0.138425	0.18383	0.0644537	-0.48324	0.0349443	0.808593	0.895558
CHD4_HUMAN	Q14839	28	Chromodomain-helicase-DNA-binding protein 4 (CHD-4) (EC 3.6.4.12) (ATP-dependent helicase CHD4) (Mi-2 autoantigen 218 kDa protein) (Mi2-beta)	CHD4	ATP-dependent chromatin remodeling [GO:0043044]; regulation of transcription by RNA polymerase II [GO:0006357]; transcription, DNA-templated [GO:0006351]	K11643;	-0.0447845	-0.0569913	-0.0468685	-0.0920095	0.0695383	-0.00938287	0.0285824	0.0150112	0.110937	0.0268893	0.970538	0.866166
CHERP_HUMAN	Q8IWX8	9	Calcium homeostasis endoplasmic reticulum protein (ERPROT 213-21) (SR-related CTD-associated factor 6)	CHERP DAN26 SCAF6	cellular calcium ion homeostasis [GO:0006874]; mRNA splicing, via spliceosome [GO:0000398]; negative regulation of cell proliferation [GO:0008285]; nervous system development [GO:0007399]; positive regulation of calcineurin-NFAT signaling cascade [GO:0070886]; release of sequestered calcium ion into cytosol [GO:0051209]	K12841;	-0.0478721	0.0210699	-0.011108	0.0364175	-0.0387037	-0.0279117	-0.0465476	0.0574055	-0.0116476	0.880166	0.981332	0.641255
CHIP_HUMAN	Q9UNE7	4	E3 ubiquitin-protein ligase CHIP (EC 2.3.2.27) (Antigen NY-CO-7) (CLL-associated antigen KW-8) (Carboxy terminus of Hsp70-interacting protein) (RING-type E3 ubiquitin transferase CHIP) (STIP1 homology and U box-containing protein 1)	STUB1 CHIP PP1131	cellular response to heat [GO:0034605]; cellular response to hypoxia [GO:0071456]; cellular response to misfolded protein [GO:0071218]; DNA repair [GO:0006281]; endoplasmic reticulum unfolded protein response [GO:0030968]; ERBB2 signaling pathway [GO:0038128]; negative regulation of protein binding [GO:0032091]; negative regulation of transforming growth factor beta receptor signaling pathway [GO…	K09561;	0.333612	0.395184	0.321336	0.236505	-0.467348	-0.572875	-0.549792	-0.460668	-0.804626	7.00097e-07	0.858436	0.498659
CHM1A_HUMAN	Q9HD42	2	Charged multivesicular body protein 1a (Chromatin-modifying protein 1a) (CHMP1a) (Vacuolar protein sorting-associated protein 46-1) (Vps46-1) (hVps46-1)	CHMP1A CHMP1 KIAA0047 PCOLN3 PRSM1	cell division [GO:0051301]; cell separation after cytokinesis [GO:0000920]; ESCRT III complex disassembly [GO:1904903]; gene silencing [GO:0016458]; mitotic chromosome condensation [GO:0007076]; mitotic metaphase plate congression [GO:0007080]; multivesicular body assembly [GO:0036258]; negative regulation of cell cycle [GO:0045786]; negative regulation of transcription, DNA-templated [GO:0045892…	K12197;	0.228855	0.113341	-0.0104473	-0.294134	0.0338422	-0.125008	-0.0445189	-0.0461343	-0.136014	0.459554	0.981332	0.322142
CHM1B_HUMAN	Q7LBR1	2	Charged multivesicular body protein 1b (CHMP1.5) (Chromatin-modifying protein 1b) (CHMP1b) (Vacuolar protein sorting-associated protein 46-2) (Vps46-2) (hVps46-2)	CHMP1B C18orf2	cell division [GO:0051301]; cell separation after cytokinesis [GO:0000920]; ESCRT III complex disassembly [GO:1904903]; establishment of protein localization [GO:0045184]; mitotic metaphase plate congression [GO:0007080]; multivesicular body assembly [GO:0036258]; nucleus organization [GO:0006997]; protein transport [GO:0015031]; regulation of centrosome duplication [GO:0010824]; regulation of mi…	K12197;	-0.433784	-0.410311	-0.396849	-0.0823486	0.256028	0.240467	0.150995	0.331503	0.65481	0.000314537	0.983835	0.36935
CHM2A_HUMAN	O43633	4	Charged multivesicular body protein 2a (Chromatin-modifying protein 2a) (CHMP2a) (Putative breast adenocarcinoma marker BC-2) (Vacuolar protein sorting-associated protein 2-1) (Vps2-1) (hVps2-1)	CHMP2A BC2 CHMP2	cell separation after cytokinesis [GO:0000920]; endosomal transport [GO:0016197]; ESCRT III complex disassembly [GO:1904903]; establishment of protein localization [GO:0045184]; exit from mitosis [GO:0010458]; macroautophagy [GO:0016236]; membrane invagination [GO:0010324]; mitotic metaphase plate congression [GO:0007080]; multivesicular body assembly [GO:0036258]; negative regulation of cell dea…	K12191;	-0.221732	-0.280789	-0.24729	-0.312424	0.189262	0.284777	0.184334	0.236481	0.458659	0.000169706	0.983835	0.896573
CHM2B_HUMAN	Q9UQN3	3	Charged multivesicular body protein 2b (CHMP2.5) (Chromatin-modifying protein 2b) (CHMP2b) (Vacuolar protein sorting-associated protein 2-2) (Vps2-2) (hVps2-2)	CHMP2B CGI-84	autophagy [GO:0006914]; cell separation after cytokinesis [GO:0000920]; cognition [GO:0050890]; endosomal transport [GO:0016197]; endosome organization [GO:0007032]; ESCRT III complex disassembly [GO:1904903]; macroautophagy [GO:0016236]; mitotic metaphase plate congression [GO:0007080]; multivesicular body assembly [GO:0036258]; multivesicular body-lysosome fusion [GO:0061763]; neuron cellular h…	K12192;	-0.0937785	-0.0816493	-0.0995701	-0.0196773	0.12401	0.0349781	0.0195784	0.0419211	0.20093	0.0150158	0.989463	0.400657
CHM4A_HUMAN	Q9BY43	4	Charged multivesicular body protein 4a (Chromatin-modifying protein 4a) (CHMP4a) (SNF7 homolog associated with Alix-2) (SNF7-1) (hSnf-1) (Vacuolar protein sorting-associated protein 32-1) (Vps32-1) (hVps32-1)	CHMP4A C14orf123 SHAX2 CDA04 HSPC134	cell separation after cytokinesis [GO:0000920]; endosomal transport [GO:0016197]; macroautophagy [GO:0016236]; membrane invagination [GO:0010324]; mitotic metaphase plate congression [GO:0007080]; multivesicular body assembly [GO:0036258]; negative regulation of autophagosome assembly [GO:1902902]; negative regulation of neuron death [GO:1901215]; nucleus organization [GO:0006997]; plasma membran…	K12194;	0.1114	0.148221	0.0593286	0.0349162	0.00806852	-0.0982657	-0.033159	-0.11636	-0.200758	0.0936404	0.990919	0.787613
CHM4B_HUMAN	Q9H444	6	Charged multivesicular body protein 4b (Chromatin-modifying protein 4b) (CHMP4b) (SNF7 homolog associated with Alix 1) (SNF7-2) (hSnf7-2) (Vacuolar protein sorting-associated protein 32-2) (Vps32-2) (hVps32-2)	CHMP4B C20orf178 SHAX1	autophagy [GO:0006914]; cell separation after cytokinesis [GO:0000920]; endosomal transport [GO:0016197]; exit from mitosis [GO:0010458]; macroautophagy [GO:0016236]; maintenance of lens transparency [GO:0036438]; membrane fission [GO:0090148]; mitotic cytokinesis [GO:0000281]; mitotic metaphase plate congression [GO:0007080]; multivesicular body assembly [GO:0036258]; negative regulation of auto…	K12194;	-0.146793	-0.145078	-0.194883	-0.194376	0.138042	0.195937	0.130716	0.179051	0.267254	0.000709413	0.981332	0.850729
CHMP3_HUMAN	Q9Y3E7	4	Charged multivesicular body protein 3 (Chromatin-modifying protein 3) (Neuroendocrine differentiation factor) (Vacuolar protein sorting-associated protein 24) (hVps24)	CHMP3 CGI149 NEDF VPS24 CGI-149	apoptotic process [GO:0006915]; autophagosome maturation [GO:0097352]; cell cycle [GO:0007049]; cell separation after cytokinesis [GO:0000920]; endosomal transport [GO:0016197]; macroautophagy [GO:0016236]; multivesicular body assembly [GO:0036258]; multivesicular body-lysosome fusion [GO:0061763]; multivesicular body sorting pathway [GO:0071985]; negative regulation of viral release from host ce…	K12193;	0.0126844	-0.135208	-0.123089	-0.0060865	0.202729	0.0512265	-0.0159433	0.159632	0.203432	0.000747556	0.294687	0.682885
CHMP5_HUMAN	Q9NZZ3	3	Charged multivesicular body protein 5 (Chromatin-modifying protein 5) (SNF7 domain-containing protein 2) (Vacuolar protein sorting-associated protein 60) (Vps60) (hVps60)	CHMP5 C9orf83 SNF7DC2 CGI-34 HSPC177 PNAS-114 PNAS-2	cell separation after cytokinesis [GO:0000920]; endosome to lysosome transport [GO:0008333]; ESCRT III complex disassembly [GO:1904903]; lysosome organization [GO:0007040]; mitotic metaphase plate congression [GO:0007080]; multivesicular body assembly [GO:0036258]; multivesicular body sorting pathway [GO:0071985]; nucleus organization [GO:0006997]; protein transport [GO:0015031]; regulation of ce…	K12198;	-0.134864	0.00159924	-0.0264453	-0.101575	-0.00209391	0.022898	0.0767827	0.0535248	0.1744	0.0403097	0.981332	0.639172
CHMP6_HUMAN	Q96FZ7	2	Charged multivesicular body protein 6 (Chromatin-modifying protein 6) (Vacuolar protein sorting-associated protein 20) (Vps20) (hVps20)	CHMP6 VPS20	cell separation after cytokinesis [GO:0000920]; endosomal transport [GO:0016197]; ESCRT III complex assembly [GO:1904902]; macroautophagy [GO:0016236]; mitotic metaphase plate congression [GO:0007080]; multivesicular body assembly [GO:0036258]; negative regulation of epidermal growth factor-activated receptor activity [GO:0007175]; nucleus organization [GO:0006997]; protein transport [GO:0015031]…	K12195;	-0.16271	-0.156129	-0.271378	0.0405824	0.110266	0.0364939	0.136786	0.135249	0.273577	0.053251	0.997926	0.597061
CHP1_HUMAN	Q99653	5	Calcineurin B homologous protein 1 (Calcineurin B-like protein) (Calcium-binding protein CHP) (Calcium-binding protein p22) (EF-hand calcium-binding domain-containing protein p22)	CHP1 CHP	calcium ion regulated exocytosis [GO:0017156]; cellular response to acidic pH [GO:0071468]; cytoplasmic microtubule organization [GO:0031122]; hyaluronan catabolic process [GO:0030214]; membrane docking [GO:0022406]; membrane fusion [GO:0061025]; membrane organization [GO:0061024]; microtubule bundle formation [GO:0001578]; negative regulation of calcineurin-NFAT signaling cascade [GO:0070885]; n…	K17610;	-0.157065	-0.0108246	-0.061365	-0.078899	-0.0114333	-0.00030799	0.00221344	-0.0450522	0.128139	0.241888	0.988285	0.793005
CHRC1_HUMAN	Q9NRG0	2	Chromatin accessibility complex protein 1 (CHRAC-1) (Chromatin accessibility complex 15 kDa protein) (CHRAC-15) (HuCHRAC15) (DNA polymerase epsilon subunit p15)	CHRAC1 CHRAC15	chromatin remodeling [GO:0006338]	K11656;	0.0219	0.217893	-0.369061	-0.00278154	0.0674012	-0.0108138	-0.157885	-0.0769109	0.0148948	0.950956	0.957195	0.37272
CHRD1_HUMAN	Q9UHD1	7	Cysteine and histidine-rich domain-containing protein 1 (CHORD domain-containing protein 1) (CHORD-containing protein 1) (CHP-1) (Protein morgana)	CHORDC1 CHP1	chaperone-mediated protein folding [GO:0061077]; negative regulation of Rho-dependent protein serine/threonine kinase activity [GO:2000299]; regulation of cellular response to heat [GO:1900034]; regulation of centrosome duplication [GO:0010824]	K16729;	0.391786	0.447132	0.354142	0.355988	-0.474249	-0.5142	-0.507447	-0.54603	-0.879599	1.12048e-06	0.990919	0.637444
CHSP1_HUMAN	Q9Y2V2	3	Calcium-regulated heat-stable protein 1 (Calcium-regulated heat-stable protein of 24 kDa) (CRHSP-24)	CARHSP1	intracellular signal transduction [GO:0035556]; regulation of mRNA stability [GO:0043488]		-0.100357	-0.129433	-0.147335	-0.054909	0.0712806	0.118784	0.155082	0.16904	0.201163	0.0750151	0.988285	0.787613
CHTOP_HUMAN	Q9Y3Y2	3	Chromatin target of PRMT1 protein (Friend of PRMT1 protein) (Small arginine- and glycine-rich protein) (SRAG)	CHTOP C1orf77 FOP HT031 PP7704	mRNA 3'-end processing [GO:0031124]; mRNA export from nucleus [GO:0006406]; positive regulation of ATPase activity [GO:0032781]; positive regulation of cell proliferation [GO:0008284]; positive regulation of helicase activity [GO:0051096]; positive regulation of histone methylation [GO:0031062]; regulation of transcription, DNA-templated [GO:0006355]; RNA export from nucleus [GO:0006405]; transcr…		-0.099674	-0.102607	-0.16302	-0.0652405	0.121761	0.112292	0.116659	0.0766452	0.23186	0.00888475	0.997631	0.812848
CI114_HUMAN	Q5T280	4	Putative methyltransferase C9orf114 (EC 2.1.1.-) (Centromere protein 32) (CENP-32) (Kinetochore-associated protein) (SPOUT domain-containing methyltransferase 1)	SPOUT1 C9orf114	cell cycle [GO:0007049]; cell division [GO:0051301]; maintenance of centrosome location [GO:0051661]; posttranscriptional regulation of gene expression [GO:0010608]; production of miRNAs involved in gene silencing by miRNA [GO:0035196]	K09142;	0.13814	0.261446	0.179042	0.337088	-0.327859	-0.234231	-0.182946	-0.17986	-0.438713	0.00070125	0.981332	0.503692
CIA2A_HUMAN	Q9H5X1	2	Cytosolic iron-sulfur assembly component 2A (MIP18 family protein FAM96A)	CIAO2A CIA2A FAM96A	chromosome segregation [GO:0007059]		0.0784304	0.116039	0.096079	-0.0500172	-0.125904	-0.148694	-0.139889	-0.108345	-0.197669	0.0105018	0.957264	0.583033
CIA2B_HUMAN	Q9Y3D0	2	Cytosolic iron-sulfur assembly component 2B (MSS19-interacting protein of 18 kDa) (Mitotic spindle-associated MMXD complex subunit MIP18) (Protein FAM96B)	CIAO2B CIAB FAM96B MIP18 CGI-128 HSPC118	chromosome segregation [GO:0007059]; iron-sulfur cluster assembly [GO:0016226]		0.112804	0.188291	-0.0311291	0.262607	-0.0906206	-0.19359	-0.169005	-0.475007	-0.153701	0.498245	0.954578	0.718273
CING_HUMAN	Q9P2M7	16	Cingulin	CGN KIAA1319	transforming growth factor beta receptor signaling pathway [GO:0007179]	K06102;	-0.0986427	0.0100736	-0.043543	-0.0387688	0.0510513	0.0473759	0.0646137	0.0624146	0.12861	0.0132119	0.988285	0.766027
CIP4_HUMAN	Q15642	10	Cdc42-interacting protein 4 (Protein Felic) (Salt tolerant protein) (hSTP) (Thyroid receptor-interacting protein 10) (TR-interacting protein 10) (TRIP-10)	TRIP10 CIP4 STOT STP	actin cytoskeleton organization [GO:0030036]; cell communication [GO:0007154]; endocytosis [GO:0006897]; membrane organization [GO:0061024]; regulation of small GTPase mediated signal transduction [GO:0051056]; signal transduction [GO:0007165]	K07196;	-0.0418308	-0.0792887	-0.0484454	-0.110886	0.0616074	0.0334683	0.0639961	0.12924	0.112099	0.183756	0.988285	0.819735
CIRBP_HUMAN	Q14011	4	Cold-inducible RNA-binding protein (A18 hnRNP) (Glycine-rich RNA-binding protein CIRP)	CIRBP A18HNRNP CIRP	mRNA stabilization [GO:0048255]; positive regulation of translation [GO:0045727]; response to cold [GO:0009409]; response to UV [GO:0009411]; stress granule assembly [GO:0034063]	K13195;	-0.397458	-0.341127	-0.355379	-0.355071	0.235559	0.296456	0.178756	0.27716	0.683639	1.45128e-07	0.972904	0.65554
CISD1_HUMAN	Q9NZ45	2	CDGSH iron-sulfur domain-containing protein 1 (MitoNEET)	CISD1 C10orf70 ZCD1 MDS029	regulation of cellular respiration [GO:0043457]		-0.250932	-0.497763	-0.248081	-0.287874	0.267095	0.220225	0.202375	0.363386	0.572674	2.58563e-05	0.864096	0.690989
CISD2_HUMAN	Q8N5K1	3	CDGSH iron-sulfur domain-containing protein 2 (Endoplasmic reticulum intermembrane small protein) (MitoNEET-related 1 protein) (Miner1) (Nutrient-deprivation autophagy factor-1) (NAF-1)	CISD2 CDGSH2 ERIS ZCD2	autophagy of mitochondrion [GO:0000422]; multicellular organism aging [GO:0010259]; regulation of autophagy [GO:0010506]		-0.141107	-0.201282	-0.0843119	-0.088932	0.116986	0.136159	0.0932109	0.207103	0.260797	0.0850585	0.997926	0.896573
CISY_HUMAN	O75390	14	Citrate synthase, mitochondrial (EC 2.3.3.1) (Citrate (Si)-synthase)	CS	carbohydrate metabolic process [GO:0005975]; tricarboxylic acid cycle [GO:0006099]	K01647;	0.122675	0.109323	0.0841079	0.0547981	-0.103378	-0.092387	-0.0960025	-0.0688874	-0.242309	5.25078e-05	0.982944	0.769326
CK068_HUMAN	Q9H3H3	4	UPF0696 protein C11orf68 (Basophilic leukemia-expressed protein Bles03) (Protein p5326)	C11orf68 BLES03			-0.0316135	-0.20394	-0.137094	-0.132925	0.187082	0.171333	0.0959949	0.109772	0.230895	0.0168017	0.936547	0.718273
CK5P3_HUMAN	Q96JB5	7	CDK5 regulatory subunit-associated protein 3 (CDK5 activator-binding protein C53) (LXXLL/leucine-zipper-containing ARF-binding protein) (Protein HSF-27)	CDK5RAP3 IC53 LZAP MSTP016 OK/SW-cl.114 PP1553	apoptotic nuclear changes [GO:0030262]; brain development [GO:0007420]; cell proliferation [GO:0008283]; endoplasmic reticulum unfolded protein response [GO:0030968]; mitotic G2/M transition checkpoint [GO:0044818]; mitotic G2 DNA damage checkpoint [GO:0007095]; negative regulation of cellular protein catabolic process [GO:1903363]; negative regulation of MAP kinase activity [GO:0043407]; negativ…		-0.147138	-0.0824503	-0.0472733	-0.0722909	0.0124148	0.0437015	0.0582788	0.108337	0.149668	0.00663146	0.957264	0.608187
CKAP2_HUMAN	Q8WWK9	2	Cytoskeleton-associated protein 2 (CTCL tumor antigen se20-10) (Tumor- and microtubule-associated protein)	CKAP2 LB1 TMAP	apoptotic process [GO:0006915]; mitotic cytokinesis [GO:0000281]; negative regulation of microtubule depolymerization [GO:0007026]; positive regulation of transcription by RNA polymerase II [GO:0045944]	K16769;	-0.141525	-0.0839031	-0.0198069	0.00694746	0.074456	0.144557	-0.0484686	-0.023777	0.221264	0.076199	0.85626	0.804277
CKAP4_HUMAN	Q07065	20	Cytoskeleton-associated protein 4 (63-kDa cytoskeleton-linking membrane protein) (Climp-63) (p63)	CKAP4	cellular protein metabolic process [GO:0044267]; neutrophil degranulation [GO:0043312]; post-translational protein modification [GO:0043687]	K13999;	-0.365153	-0.324984	-0.280097	-0.354835	0.270497	0.280784	0.234984	0.27033	0.618553	7.09249e-10	0.988285	0.610447
CKAP5_HUMAN	Q14008	31	Cytoskeleton-associated protein 5 (Colonic and hepatic tumor overexpressed gene protein) (Ch-TOG)	CKAP5 KIAA0097	cell division [GO:0051301]; centrosome cycle [GO:0007098]; centrosome duplication [GO:0051298]; ciliary basal body-plasma membrane docking [GO:0097711]; establishment or maintenance of microtubule cytoskeleton polarity [GO:0030951]; G2/M transition of mitotic cell cycle [GO:0000086]; microtubule depolymerization [GO:0007019]; microtubule polymerization [GO:0046785]; regulation of G2/M transition …	K16803;	0.0263865	0.0395042	0.0250484	0.0903008	-0.0879692	-0.0380347	-0.0312168	-0.0335383	-0.110547	0.130798	0.988285	0.834641
CKLF6_HUMAN	Q9NX76	2	CKLF-like MARVEL transmembrane domain-containing protein 6 (Chemokine-like factor superfamily member 6)	CMTM6 CKLFSF6	endocytic recycling [GO:0032456]; neutrophil degranulation [GO:0043312]; protein transport [GO:0015031]; regulation of protein stability [GO:0031647]		-0.0904393	-0.146876	0.00202187	-0.103465	0.140731	0.120371	0.0340449	0.0012084	0.182058	0.107527	0.863371	0.690989
CKS1_HUMAN	P61024	2	Cyclin-dependent kinases regulatory subunit 1 (CKS-1)	CKS1B CKS1 PNAS-143 PNAS-16	cell cycle [GO:0007049]; cell division [GO:0051301]; positive regulation of cyclin-dependent protein serine/threonine kinase activity [GO:0045737]; positive regulation of transcription, DNA-templated [GO:0045893]; regulation of mitotic cell cycle [GO:0007346]	K02219;	0.151612	0.194635	-0.00198527	-0.436574	-0.237596	-0.0942289	0.0265077	0.029051	-0.272528	0.0899345	0.981332	0.319253
CLAP1_HUMAN	Q7Z460	3	CLIP-associating protein 1 (Cytoplasmic linker-associated protein 1) (Multiple asters homolog 1) (Protein Orbit homolog 1) (hOrbit1)	CLASP1 KIAA0622 MAST1	astral microtubule organization [GO:0030953]; cell division [GO:0051301]; ciliary basal body-plasma membrane docking [GO:0097711]; establishment of epithelial cell polarity [GO:0090162]; establishment of mitotic spindle localization [GO:0040001]; establishment of spindle orientation [GO:0051294]; establishment or maintenance of cell polarity [GO:0007163]; exit from mitosis [GO:0010458]; G2/M tran…	K16578;	-0.249119	-0.16984	0.00571524	-0.0651256	0.118121	0.0489894	0.13509	0.115833	0.394127	0.0182376	0.990919	0.267036
CLAP2_HUMAN	O75122	7	CLIP-associating protein 2 (Cytoplasmic linker-associated protein 2) (Protein Orbit homolog 2) (hOrbit2)	CLASP2 KIAA0627	cell division [GO:0051301]; establishment or maintenance of cell polarity [GO:0007163]; exit from mitosis [GO:0010458]; Golgi organization [GO:0007030]; microtubule anchoring [GO:0034453]; microtubule cytoskeleton organization [GO:0000226]; microtubule nucleation [GO:0007020]; microtubule organizing center organization [GO:0031023]; mitotic spindle organization [GO:0007052]; negative regulation o…	K16578;	-0.107622	0.00905677	-0.0316499	0.0685358	-0.127986	-0.0507629	0.0569797	-0.053551	-0.00948173	0.940746	0.872304	0.500338
CLCA_HUMAN	P09496	4	Clathrin light chain A (Lca)	CLTA	antigen processing and presentation of exogenous peptide antigen via MHC class II [GO:0019886]; cell cycle [GO:0007049]; cell division [GO:0051301]; clathrin coat assembly [GO:0048268]; clathrin-dependent endocytosis [GO:0072583]; intracellular protein transport [GO:0006886]; low-density lipoprotein particle clearance [GO:0034383]; low-density lipoprotein particle receptor catabolic process [GO:0…	K04644;	-0.146751	-0.130858	-0.130466	-0.0958923	0.150987	0.0705393	0.0884554	0.142674	0.238745	0.00221875	0.978583	0.901416
CLCB_HUMAN	P09497	8	Clathrin light chain B (Lcb)	CLTB	clathrin-dependent endocytosis [GO:0072583]; intracellular protein transport [GO:0006886]; membrane organization [GO:0061024]	K04645;	-0.0019683	0.138212	0.0176822	-0.0441846	-0.0554178	-0.040132	0.0598898	0.00123708	-0.0543473	0.478262	0.988285	0.529417
CLCC1_HUMAN	Q96S66	4	Chloride channel CLIC-like protein 1 (Mid-1-related chloride channel protein 1)	CLCC1 KIAA0761 MCLC		K22188;	-0.00119355	-0.114568	-0.019821	-0.102751	-0.0179058	0.0590468	-0.0488446	0.108348	0.0212391	0.868403	0.966567	0.766027
CLD6_HUMAN	P56747	3	Claudin-6 (Skullin)	CLDN6 UNQ757/PRO1488	calcium-independent cell-cell adhesion via plasma membrane cell-adhesion molecules [GO:0016338]; cell-cell junction organization [GO:0045216]	K06087;	0.219962	0.201163	0.229349	0.20657	-0.253534	-0.291851	-0.310333	-0.273862	-0.488268	0.000103616	0.998719	0.955843
CLH1_HUMAN	Q00610	67	Clathrin heavy chain 1 (Clathrin heavy chain on chromosome 17) (CLH-17)	CLTC CLH17 CLTCL2 KIAA0034	antigen processing and presentation of exogenous peptide antigen via MHC class II [GO:0019886]; autophagy [GO:0006914]; cell division [GO:0051301]; clathrin coat assembly [GO:0048268]; clathrin-dependent endocytosis [GO:0072583]; intracellular protein transport [GO:0006886]; low-density lipoprotein particle clearance [GO:0034383]; low-density lipoprotein particle receptor catabolic process [GO:00…	K04646;	-0.0485993	-0.0744388	-0.0597857	-0.0437225	0.040879	0.0484477	0.0130378	0.0752247	0.0807974	0.038068	0.954578	0.870804
CLIC1_HUMAN	O00299	10	Chloride intracellular channel protein 1 (Chloride channel ABP) (Nuclear chloride ion channel 27) (NCC27) (Regulatory nuclear chloride ion channel protein) (hRNCC)	CLIC1 G6 NCC27	chloride transport [GO:0006821]; platelet aggregation [GO:0070527]; positive regulation of osteoblast differentiation [GO:0045669]; regulation of cell cycle [GO:0051726]; regulation of ion transmembrane transport [GO:0034765]; regulation of mitochondrial membrane potential [GO:0051881]; signal transduction [GO:0007165]	K05021;	0.0577476	0.0169042	0.0393081	0.00987524	-0.0218406	-0.0316039	-0.0187277	0.00218939	-0.0750071	0.309661	0.997926	0.948778
CLIC3_HUMAN	O95833	7	Chloride intracellular channel protein 3	CLIC3	chloride transport [GO:0006821]; regulation of ion transmembrane transport [GO:0034765]; signal transduction [GO:0007165]	K05023;	-0.109716	-0.112918	-0.201019	-0.15278	0.224741	0.0596047	0.0978275	0.0504901	0.310406	0.000538899	0.913278	0.690989
CLIC4_HUMAN	Q9Y696	11	Chloride intracellular channel protein 4 (Intracellular chloride ion channel protein p64H1)	CLIC4	angiogenesis [GO:0001525]; branching morphogenesis of an epithelial tube [GO:0048754]; cell differentiation [GO:0030154]; cellular response to calcium ion [GO:0071277]; chloride transmembrane transport [GO:1902476]; chloride transport [GO:0006821]; endothelial cell morphogenesis [GO:0001886]; establishment or maintenance of apical/basal cell polarity [GO:0035088]; fertilization [GO:0009566]; kera…	K05024;	0.0001917	-0.0374599	-0.0293491	-0.0240355	0.10168	0.00652423	-0.0769104	0.0189175	0.0689865	0.387521	0.849929	0.705966
CLIP1_HUMAN	P30622	9	CAP-Gly domain-containing linker protein 1 (Cytoplasmic linker protein 1) (Cytoplasmic linker protein 170 alpha-2) (CLIP-170) (Reed-Sternberg intermediate filament-associated protein) (Restin)	CLIP1 CYLN1 RSN	microtubule bundle formation [GO:0001578]; mitotic cell cycle [GO:0000278]; positive regulation of microtubule polymerization [GO:0031116]; protein transport into plasma membrane raft [GO:0044861]	K10421;	0.0286925	0.095243	0.132012	0.0613281	-0.122715	-0.0662614	-0.183915	-0.0561543	-0.177053	0.0294297	0.85626	0.896573
CLIP2_HUMAN	Q9UDT6	3	CAP-Gly domain-containing linker protein 2 (Cytoplasmic linker protein 115) (CLIP-115) (Cytoplasmic linker protein 2) (Williams-Beuren syndrome chromosomal region 3 protein) (Williams-Beuren syndrome chromosomal region 4 protein)	CLIP2 CYLN2 KIAA0291 WBSCR3 WBSCR4 WSCR4		K10422;	-0.670967	-0.643244	-0.272766	-0.286893	0.327428	0.112007	0.333847	0.43456	0.9852	0.000135999	0.988285	0.580894
CLP1L_HUMAN	Q96KA5	5	Cleft lip and palate transmembrane protein 1-like protein (CLPTM1-like protein) (Cisplatin resistance-related protein 9) (CRR9p)	CLPTM1L CRR9	apoptotic process [GO:0006915]		0.154348	0.130695	0.133762	0.152246	-0.194943	-0.216636	-0.172585	-0.194859	-0.328546	0.00885619	0.998719	0.964981
CLPB_HUMAN	Q9H078	5	Caseinolytic peptidase B protein homolog (EC 3.6.1.3) (Suppressor of potassium transport defect 3)	CLPB HSP78 SKD3	cellular response to heat [GO:0034605]	K03695;	0.290454	0.193	0.149442	0.135767	-0.211674	-0.209529	-0.23301	-0.174238	-0.511748	0.000105974	0.981332	0.582783
CLPP_HUMAN	Q16740	4	ATP-dependent Clp protease proteolytic subunit, mitochondrial (EC 3.4.21.92) (Endopeptidase Clp)	CLPP	protein homooligomerization [GO:0051260]; proteolysis involved in cellular protein catabolic process [GO:0051603]	K01358;	-0.022913	0.126854	-0.0168492	-0.282234	0.160208	0.04822	-0.0631839	-0.0328446	0.142991	0.0776446	0.861501	0.287377
CLPX_HUMAN	O76031	3	ATP-dependent Clp protease ATP-binding subunit clpX-like, mitochondrial	CLPX	ATP metabolic process [GO:0046034]; protein folding [GO:0006457]; proteolysis involved in cellular protein catabolic process [GO:0051603]	K03544;	0.167271	0.430376	0.125641	0.280966	-0.254045	-0.338293	-0.419637	-0.378757	-0.461979	0.00245186	0.978908	0.122758
CLU_HUMAN	O75153	12	Clustered mitochondria protein homolog	CLUH KIAA0664	intracellular distribution of mitochondria [GO:0048312]; mitochondrion organization [GO:0007005]	K03255;	0.27745	0.361429	0.327657	0.405124	-0.535263	-0.532501	-0.467797	-0.418892	-0.817023	5.69226e-08	0.936547	0.691942
CMBL_HUMAN	Q96DG6	2	Carboxymethylenebutenolidase homolog (EC 3.1.-.-)	CMBL	xenobiotic metabolic process [GO:0006805]	K01061;	0.147137	0.048736	0.0375646	-0.0390393	0.0868241	0.0173351	-0.087158	-0.0734565	-0.0633323	0.625682	0.856133	0.723621
CMC1_HUMAN	O75746	4	Calcium-binding mitochondrial carrier protein Aralar1 (Mitochondrial aspartate glutamate carrier 1) (Solute carrier family 25 member 12)	SLC25A12 ARALAR1	aspartate transmembrane transport [GO:0015810]; gluconeogenesis [GO:0006094]; L-glutamate transmembrane transport [GO:0015813]; malate-aspartate shuttle [GO:0043490]; response to calcium ion [GO:0051592]	K15105;	-0.17143	-0.206465	-0.129704	-0.220113	0.101046	0.112697	0.26574	0.141528	0.314228	0.0186666	0.934909	0.979449
CMC2_HUMAN	Q9UJS0	23	Calcium-binding mitochondrial carrier protein Aralar2 (Citrin) (Mitochondrial aspartate glutamate carrier 2) (Solute carrier family 25 member 13)	SLC25A13 ARALAR2	aspartate transmembrane transport [GO:0015810]; ATP biosynthetic process [GO:0006754]; cellular respiration [GO:0045333]; gluconeogenesis [GO:0006094]; L-glutamate transmembrane transport [GO:0015813]; malate-aspartate shuttle [GO:0043490]; mitochondrial transport [GO:0006839]; response to calcium ion [GO:0051592]	K15105;	-0.171426	-0.213087	-0.162389	-0.222369	0.168953	0.1771	0.184797	0.104858	0.290668	7.73395e-05	0.92875	0.888167
CMIP_HUMAN	Q8IY22	2	C-Maf-inducing protein (c-Mip) (Truncated c-Maf-inducing protein) (Tc-Mip)	CMIP KIAA1694 TCMIP			-0.498183	-0.385235	-0.101911	0.0341502	0.0312173	0.128144	0.0616157	0.167427	0.524545	0.00162151	0.981332	0.427406
CMTR1_HUMAN	Q8N1G2	6	Cap-specific mRNA (nucleoside-2'-O-)-methyltransferase 1 (EC 2.1.1.57) (Cap methyltransferase 1) (Cap1 2'O-ribose methyltransferase 1) (MTr1) (hMTr1) (FtsJ methyltransferase domain-containing protein 2) (Interferon-stimulated gene 95 kDa protein) (ISG95)	CMTR1 FTSJD2 KIAA0082 MTR1	7-methylguanosine mRNA capping [GO:0006370]; cap1 mRNA methylation [GO:0097309]; mRNA methylation [GO:0080009]	K14589;	-0.112889	-0.108391	-0.0606471	-0.0729042	0.035411	0.1724	0.0899199	0.0856745	0.146367	0.133283	0.988285	0.91365
CN37_HUMAN	P09543	7	2',3'-cyclic-nucleotide 3'-phosphodiesterase (CNP) (CNPase) (EC 3.1.4.37)	CNP	adult locomotory behavior [GO:0008344]; aging [GO:0007568]; axonogenesis [GO:0007409]; chemical synaptic transmission [GO:0007268]; cyclic nucleotide catabolic process [GO:0009214]; forebrain development [GO:0030900]; microtubule cytoskeleton organization [GO:0000226]; oligodendrocyte differentiation [GO:0048709]; regulation of mitochondrial membrane permeability [GO:0046902]; response to lipopol…	K01121;	-0.128537	-0.18326	0.029872	-0.0393848	0.0704722	0.102416	0.0415135	0.0407438	0.216723	0.0984124	0.988285	0.686584
CND1_HUMAN	Q15021	27	Condensin complex subunit 1 (Chromosome condensation-related SMC-associated protein 1) (Chromosome-associated protein D2) (hCAP-D2) (Non-SMC condensin I complex subunit D2) (XCAP-D2 homolog)	NCAPD2 CAPD2 CNAP1 KIAA0159	cell division [GO:0051301]; chromosome separation [GO:0051304]; meiotic chromosome condensation [GO:0010032]; mitotic chromosome condensation [GO:0007076]	K06677;	0.206214	0.295731	0.318065	0.234574	-0.373954	-0.374863	-0.282135	-0.36595	-0.57958	1.5039e-07	0.998719	0.281188
CND2_HUMAN	Q15003	18	Condensin complex subunit 2 (Barren homolog protein 1) (Chromosome-associated protein H) (hCAP-H) (Non-SMC condensin I complex subunit H) (XCAP-H homolog)	NCAPH BRRN BRRN1 CAPH KIAA0074	cell division [GO:0051301]; female meiosis chromosome separation [GO:0051309]; meiotic chromosome condensation [GO:0010032]; mitotic chromosome condensation [GO:0007076]	K06676;	0.265802	0.351411	0.258829	0.326977	-0.336903	-0.419679	-0.333867	-0.379391	-0.665538	1.19553e-08	0.981332	0.637444
CND3_HUMAN	Q9BPX3	11	Condensin complex subunit 3 (Chromosome-associated protein G) (Condensin subunit CAP-G) (hCAP-G) (Melanoma antigen NY-MEL-3) (Non-SMC condensin I complex subunit G) (XCAP-G homolog)	NCAPG CAPG NYMEL3	cell division [GO:0051301]; mitotic chromosome condensation [GO:0007076]	K06678;	0.251657	0.168936	0.22176	0.293819	-0.329149	-0.3356	-0.352033	-0.321288	-0.587258	1.02155e-07	0.989463	0.75797
CNDD3_HUMAN	P42695	4	Condensin-2 complex subunit D3 (Non-SMC condensin II complex subunit D3) (hCAP-D3)	NCAPD3 CAPD3 KIAA0056	cell division [GO:0051301]; chromosome separation [GO:0051304]; meiotic chromosome condensation [GO:0010032]; mitotic chromosome condensation [GO:0007076]	K11491;	-0.075112	-0.159281	-0.152626	-0.0537811	-0.0417665	0.0879201	0.23697	0.150917	0.0144232	0.884536	0.808593	0.912554
CNDG2_HUMAN	Q86XI2	6	Condensin-2 complex subunit G2 (Chromosome-associated protein G2) (CAP-G2) (hCAP-G2) (Leucine zipper protein 5) (Non-SMC condensin II complex subunit G2)	NCAPG2 LUZP5	cell cycle [GO:0007049]; cell division [GO:0051301]; chromosome condensation [GO:0030261]; erythrocyte differentiation [GO:0030218]; inner cell mass cell proliferation [GO:0001833]; negative regulation of erythrocyte differentiation [GO:0045647]; positive regulation of protein tyrosine kinase activity [GO:0061098]; positive regulation of signaling receptor activity [GO:2000273]; transcription by …	K11492;	-0.0498094	-0.0638362	-0.0418192	0.0291659	0.0442696	0.0533172	0.0529386	0.0830573	0.0881845	0.104785	0.988285	0.787613
CNDP2_HUMAN	Q96KP4	16	Cytosolic non-specific dipeptidase (EC 3.4.13.18) (CNDP dipeptidase 2) (Carnosine dipeptidase II) (Epididymis secretory protein Li 13) (Glutamate carboxypeptidase-like protein 1) (Peptidase A)	CNDP2 CN2 CPGL HEL-S-13 PEPA	glutathione biosynthetic process [GO:0006750]	K08660;	-0.0146102	0.00274667	-0.0296449	0.0348919	0.0218535	0.023189	-0.000871607	-0.0341567	0.0431979	0.398104	0.979452	0.804568
CNN2_HUMAN	Q99439	8	Calponin-2 (Calponin H2, smooth muscle) (Neutral calponin)	CNN2	actomyosin structure organization [GO:0031032]; cellular response to mechanical stimulus [GO:0071260]; cytoskeleton organization [GO:0007010]; interleukin-12-mediated signaling pathway [GO:0035722]; neutrophil degranulation [GO:0043312]; regulation of actin filament-based process [GO:0032970]		0.0969647	0.138082	0.139129	0.162806	-0.234363	-0.135145	-0.0958335	-0.174275	-0.333152	0.00205019	0.978583	0.94478
CNN3_HUMAN	Q15417	9	Calponin-3 (Calponin, acidic isoform)	CNN3	actomyosin structure organization [GO:0031032]; epithelial cell differentiation [GO:0030855]; negative regulation of ATPase activity [GO:0032780]		-0.186603	-0.234601	-0.208058	-0.196361	0.233642	0.183576	0.0915379	0.168181	0.380188	8.16874e-05	0.915082	0.698665
CNNM3_HUMAN	Q8NE01	2	Metal transporter CNNM3 (Ancient conserved domain-containing protein 3) (Cyclin-M3)	CNNM3 ACDP3	ion transport [GO:0006811]	K16302;	-0.230272	-0.480771	-0.550472	-0.555009	0.394337	0.291398	0.403298	0.201972	0.740695	0.00026998	0.966567	0.761983
CNNM4_HUMAN	Q6P4Q7	2	Metal transporter CNNM4 (Ancient conserved domain-containing protein 4) (Cyclin-M4)	CNNM4 ACDP4 KIAA1592	enamel mineralization [GO:0070166]; magnesium ion homeostasis [GO:0010960]; metal ion homeostasis [GO:0055065]; response to stimulus [GO:0050896]; visual perception [GO:0007601]	K16302;	-0.705966	-0.168325	-1.50813	-0.705795	-0.875471	-0.875452	-0.422482	0.274063	-0.461404	0.661868	0.913278	0.587419
CNO10_HUMAN	Q9H9A5	2	CCR4-NOT transcription complex subunit 10	CNOT10	DNA damage response, signal transduction by p53 class mediator resulting in cell cycle arrest [GO:0006977]; gene silencing by RNA [GO:0031047]; nuclear-transcribed mRNA poly(A) tail shortening [GO:0000289]; regulation of transcription, DNA-templated [GO:0006355]; regulation of translation [GO:0006417]; transcription, DNA-templated [GO:0006351]	K12607;	-0.732652	-0.393045	-0.0754367	-0.157025	0.273163	-0.479331	0.425997	0.00723008	1.00749	0.0177534	0.734107	0.688967
CNO11_HUMAN	Q9UKZ1	3	CCR4-NOT transcription complex subunit 11	CNOT11 C2orf29 C40	cell proliferation [GO:0008283]; DNA damage response, signal transduction by p53 class mediator resulting in cell cycle arrest [GO:0006977]; gene silencing by RNA [GO:0031047]; nuclear-transcribed mRNA poly(A) tail shortening [GO:0000289]; regulation of transcription, DNA-templated [GO:0006355]; regulation of translation [GO:0006417]; transcription, DNA-templated [GO:0006351]		-0.0457644	-0.149907	-0.167558	0.0369073	0.0960294	0.109153	0.0459508	0.135943	0.162319	0.203329	0.993272	0.587419
CNOT1_HUMAN	A5YKK6	33	CCR4-NOT transcription complex subunit 1 (CCR4-associated factor 1) (Negative regulator of transcription subunit 1 homolog) (NOT1H) (hNOT1)	CNOT1 CDC39 KIAA1007 NOT1 AD-005	DNA damage response, signal transduction by p53 class mediator resulting in cell cycle arrest [GO:0006977]; gene silencing by miRNA [GO:0035195]; multicellular organism development [GO:0007275]; negative regulation of intracellular estrogen receptor signaling pathway [GO:0033147]; negative regulation of retinoic acid receptor signaling pathway [GO:0048387]; negative regulation of transcription by…	K12604;	-0.089099	-0.104649	0.0205394	0.0420028	-0.0505454	0.0310818	0.0276725	0.0304709	0.0335052	0.625682	0.936547	0.400657
CNOT2_HUMAN	Q9NZN8	4	CCR4-NOT transcription complex subunit 2 (CCR4-associated factor 2)	CNOT2 CDC36 NOT2 HSPC131 MSTP046	DNA damage response, signal transduction by p53 class mediator resulting in cell cycle arrest [GO:0006977]; gene silencing by RNA [GO:0031047]; negative regulation of intracellular estrogen receptor signaling pathway [GO:0033147]; negative regulation of transcription by RNA polymerase II [GO:0000122]; negative regulation of translation [GO:0017148]; nuclear-transcribed mRNA catabolic process, dea…	K12605;	0.0355786	0.151355	-0.0279759	-0.0582503	-0.0292443	-0.06091	-0.0972639	-0.0211007	-0.0822493	0.277053	0.981877	0.304924
CNOT3_HUMAN	O75175	5	CCR4-NOT transcription complex subunit 3 (CCR4-associated factor 3) (Leukocyte receptor cluster member 2)	CNOT3 KIAA0691 LENG2 NOT3	DNA damage response, signal transduction by p53 class mediator resulting in cell cycle arrest [GO:0006977]; gene silencing by RNA [GO:0031047]; negative regulation of translation [GO:0017148]; nuclear-transcribed mRNA catabolic process, deadenylation-dependent decay [GO:0000288]; nuclear-transcribed mRNA poly(A) tail shortening [GO:0000289]; positive regulation of cold-induced thermogenesis [GO:0…	K12580;	-0.044905	0.070538	-0.0602588	-0.0567543	-0.105338	-0.00527913	-0.0560214	0.0367134	-0.0872381	0.257193	0.85626	0.690989
CNOT6_HUMAN	Q9ULM6	2	CCR4-NOT transcription complex subunit 6 (EC 3.1.13.4) (CCR4 carbon catabolite repression 4-like) (Carbon catabolite repressor protein 4 homolog) (Cytoplasmic deadenylase)	CNOT6 CCR4 CCR4a KIAA1194	DNA damage response, signal transduction by p53 class mediator resulting in cell cycle arrest [GO:0006977]; exonucleolytic nuclear-transcribed mRNA catabolic process involved in deadenylation-dependent decay [GO:0043928]; gene silencing by miRNA [GO:0035195]; nuclear-transcribed mRNA catabolic process, no-go decay [GO:0070966]; nuclear-transcribed mRNA poly(A) tail shortening [GO:0000289]; positi…	K12603;	0.20401	0.155828	0.105346	0.10131	-0.36629	-0.136135	-0.138982	-0.2864	-0.389069	0.117517	0.988285	0.891625
CNOT7_HUMAN	Q9UIV1	2	CCR4-NOT transcription complex subunit 7 (EC 3.1.13.4) (BTG1-binding factor 1) (CCR4-associated factor 1) (CAF-1) (Caf1a)	CNOT7 CAF1	carbohydrate metabolic process [GO:0005975]; cytoplasmic mRNA processing body assembly [GO:0033962]; deadenylation-dependent decapping of nuclear-transcribed mRNA [GO:0000290]; defense response to virus [GO:0051607]; DNA damage response, signal transduction by p53 class mediator resulting in cell cycle arrest [GO:0006977]; exonucleolytic nuclear-transcribed mRNA catabolic process involved in dead…	K12581;	0.461087	-0.278851	-0.341688	-0.191061	0.0409458	0.171263	0.337469	-0.343098	-0.411684	0.16378	0.767238	0.169927
CNOT9_HUMAN	Q92600	2	CCR4-NOT transcription complex subunit 9 (Cell differentiation protein RQCD1 homolog) (Rcd-1)	CNOT9 RCD1 RQCD1	cytokine-mediated signaling pathway [GO:0019221]; DNA damage response, signal transduction by p53 class mediator resulting in cell cycle arrest [GO:0006977]; gene silencing by RNA [GO:0031047]; negative regulation of intracellular estrogen receptor signaling pathway [GO:0033147]; negative regulation of translation [GO:0017148]; nuclear-transcribed mRNA catabolic process, deadenylation-dependent d…	K12606;	-0.277664	-0.100467	-0.131062	-0.0454424	0.031047	0.117371	0.163618	0.0105638	0.221852	0.0899345	0.844806	0.814874
CNPY2_HUMAN	Q9Y2B0	6	Protein canopy homolog 2 (MIR-interacting saposin-like protein) (Putative secreted protein Zsig9) (Transmembrane protein 4)	CNPY2 MSAP TMEM4 ZSIG9 UNQ1943/PRO4426	enzyme linked receptor protein signaling pathway [GO:0007167]; negative regulation of gene expression [GO:0010629]; positive regulation of low-density lipoprotein particle receptor biosynthetic process [GO:0045716]; regulation of low-density lipoprotein particle clearance [GO:0010988]; tissue development [GO:0009888]		-0.175059	-0.0555341	-0.225494	-0.208766	0.0899629	0.143546	0.0812072	0.131836	0.306004	0.000613073	0.997631	0.434115
CO4A2_HUMAN	P08572	2	Collagen alpha-2(IV) chain [Cleaved into: Canstatin]	COL4A2	aging [GO:0007568]; angiogenesis [GO:0001525]; cellular response to transforming growth factor beta stimulus [GO:0071560]; collagen-activated tyrosine kinase receptor signaling pathway [GO:0038063]; endodermal cell differentiation [GO:0035987]; extracellular matrix organization [GO:0030198]; negative regulation of angiogenesis [GO:0016525]; response to activity [GO:0014823]; transcription, DNA-te…	K06237;	-0.120445	-0.121222	-0.0754271	-0.125268	0.270347	0.092248	0.133308	0.00106357	0.272701	0.0862396	0.994175	0.787613
COA3_HUMAN	Q9Y2R0	2	Cytochrome c oxidase assembly factor 3 homolog, mitochondrial (Coiled-coil domain-containing protein 56) (Mitochondrial translation regulation assembly intermediate of cytochrome c oxidase protein of 12 kDa)	COA3 CCDC56 MITRAC12 HSPC009	mitochondrial respiratory chain complex IV assembly [GO:0033617]; positive regulation of mitochondrial translation [GO:0070131]	K18175;	0.200599	0.243216	0.104097	0.124294	-0.292231	-0.371383	-0.0699095	-0.0611827	-0.323456	0.125085	0.808593	0.873891
COASY_HUMAN	Q13057	3	Bifunctional coenzyme A synthase (CoA synthase) (NBP) (POV-2) [Includes: Phosphopantetheine adenylyltransferase (EC 2.7.7.3) (Dephospho-CoA pyrophosphorylase) (Pantetheine-phosphate adenylyltransferase) (PPAT); Dephospho-CoA kinase (DPCK) (EC 2.7.1.24) (Dephosphocoenzyme A kinase) (DPCOAK)]	COASY PSEC0106	coenzyme A biosynthetic process [GO:0015937]; coenzyme biosynthetic process [GO:0009108]	K02318;	0.172415	0.332617	0.0999091	-0.0321091	-0.262247	-0.0543654	-0.239215	-0.0705635	-0.306198	0.0978953	0.997926	0.400657
COCA1_HUMAN	Q99715	3	Collagen alpha-1(XII) chain	COL12A1 COL12A1L	cell adhesion [GO:0007155]; collagen fibril organization [GO:0030199]; endodermal cell differentiation [GO:0035987]; skeletal system development [GO:0001501]	K08132;	0.0990723	0.260752	-0.0186175	-0.18894	0.133655	-0.0213001	-0.0250245	-0.210577	0.101496	0.704533	0.936547	0.654141
COF1_HUMAN	P23528	3	Cofilin-1 (18 kDa phosphoprotein) (p18) (Cofilin, non-muscle isoform)	CFL1 CFL	actin cytoskeleton organization [GO:0030036]; actin filament depolymerization [GO:0030042]; actin filament fragmentation [GO:0030043]; cytoskeleton organization [GO:0007010]; establishment of cell polarity [GO:0030010]; interleukin-12-mediated signaling pathway [GO:0035722]; mitotic cytokinesis [GO:0000281]; negative regulation of apoptotic process [GO:0043066]; neural crest cell migration [GO:00…	K05765;	0.0675925	0.0213521	0.0418538	0.0947984	-0.066599	-0.0383609	-0.0532652	-0.040296	-0.116152	0.264815	0.990919	0.813563
COF2_HUMAN	Q9Y281	8	Cofilin-2 (Cofilin, muscle isoform)	CFL2	actin filament depolymerization [GO:0030042]; actin filament fragmentation [GO:0030043]; muscle cell cellular homeostasis [GO:0046716]; positive regulation of actin filament depolymerization [GO:0030836]; sarcomere organization [GO:0045214]; skeletal muscle tissue development [GO:0007519]	K05765;	0.222016	0.310975	0.120369	0.187044	-0.297444	-0.181079	-0.237778	-0.14963	-0.519	2.15212e-05	0.954578	0.345847
COG1_HUMAN	Q8WTW3	4	Conserved oligomeric Golgi complex subunit 1 (COG complex subunit 1) (Component of oligomeric Golgi complex 1)	COG1 KIAA1381 LDLB	ER to Golgi vesicle-mediated transport [GO:0006888]; Golgi organization [GO:0007030]; intra-Golgi vesicle-mediated transport [GO:0006891]; protein transport [GO:0015031]	K20288;	-0.136561	-0.0972739	-0.134877	-0.199142	0.124972	0.178809	0.0368896	0.118364	0.249004	0.00655875	0.872304	0.981927
COG2_HUMAN	Q14746	4	Conserved oligomeric Golgi complex subunit 2 (COG complex subunit 2) (Component of oligomeric Golgi complex 2) (Low density lipoprotein receptor defect C-complementing protein)	COG2 LDLC	ER to Golgi vesicle-mediated transport [GO:0006888]; Golgi organization [GO:0007030]; intra-Golgi vesicle-mediated transport [GO:0006891]	K20289;	-0.0791225	-0.330312	-0.102964	-0.218018	0.109007	0.0368318	0.0846336	0.0601664	0.242444	0.113176	0.981332	0.565415
COG4_HUMAN	Q9H9E3	5	Conserved oligomeric Golgi complex subunit 4 (COG complex subunit 4) (Component of oligomeric Golgi complex 4)	COG4	ER to Golgi vesicle-mediated transport [GO:0006888]; Golgi organization [GO:0007030]; Golgi vesicle prefusion complex stabilization [GO:0048213]; protein transport [GO:0015031]; retrograde transport, vesicle recycling within Golgi [GO:0000301]; retrograde vesicle-mediated transport, Golgi to ER [GO:0006890]	K20291;	-0.0455401	0.0964764	-0.26477	-0.222069	0.088798	0.0489775	0.0552342	-0.0353641	0.15526	0.28551	0.974954	0.707348
COG5_HUMAN	Q9UP83	3	Conserved oligomeric Golgi complex subunit 5 (COG complex subunit 5) (13S Golgi transport complex 90 kDa subunit) (GTC-90) (Component of oligomeric Golgi complex 5) (Golgi transport complex 1)	COG5 GOLTC1 GTC90	ER to Golgi vesicle-mediated transport [GO:0006888]; intra-Golgi vesicle-mediated transport [GO:0006891]; protein transport [GO:0015031]	K20292;	-0.198029	-0.162487	-0.108623	-0.283452	0.239264	0.176796	0.151771	0.0450904	0.443146	0.00112647	0.808593	0.912554
COG7_HUMAN	P83436	2	Conserved oligomeric Golgi complex subunit 7 (COG complex subunit 7) (Component of oligomeric Golgi complex 7)	COG7 UNQ3082/PRO10013	ER to Golgi vesicle-mediated transport [GO:0006888]; Golgi organization [GO:0007030]; intracellular protein transport [GO:0006886]; protein glycosylation [GO:0006486]; protein localization to Golgi apparatus [GO:0034067]; protein localization to organelle [GO:0033365]; protein stabilization [GO:0050821]; retrograde vesicle-mediated transport, Golgi to ER [GO:0006890]	K20294;	-0.307741	0.129309	-0.244039	-0.328532	0.0229019	0.0722113	0.266556	-0.00190997	0.289346	0.524354	0.993272	0.774258
COHA1_HUMAN	Q9UMD9	8	Collagen alpha-1(XVII) chain (180 kDa bullous pemphigoid antigen 2) (Bullous pemphigoid antigen 2) [Cleaved into: 120 kDa linear IgA disease antigen (120 kDa linear IgA dermatosis antigen) (Linear IgA disease antigen 1) (LAD-1); 97 kDa linear IgA disease antigen (97 kDa linear IgA bullous dermatosis antigen) (97 kDa LAD antigen) (97-LAD) (Linear IgA bullous disease antigen of 97 kDa) (LABD97)]	COL17A1 BP180 BPAG2	cell-matrix adhesion [GO:0007160]; epidermis development [GO:0008544]; hemidesmosome assembly [GO:0031581]; regulation of immune response [GO:0050776]	K07603;	-0.620851	-0.648222	-0.578269	-0.508134	0.391238	0.507477	0.33867	0.325208	0.962995	3.03786e-08	0.913278	0.51846
COIA1_HUMAN	P39060	6	Collagen alpha-1(XVIII) chain [Cleaved into: Endostatin; Non-collagenous domain 1 (NC1)]	COL18A1	angiogenesis [GO:0001525]; animal organ morphogenesis [GO:0009887]; cell adhesion [GO:0007155]; endothelial cell morphogenesis [GO:0001886]; extracellular matrix organization [GO:0030198]; negative regulation of cell proliferation [GO:0008285]; positive regulation of cell migration [GO:0030335]; positive regulation of cell proliferation [GO:0008284]; positive regulation of endothelial cell apopto…	K06823;	-0.60825	-0.610628	-0.664754	-0.546715	0.43485	0.459381	0.415403	0.236478	1.00825	4.89055e-08	0.632528	0.859834
COIL_HUMAN	P38432	2	Coilin (p80-coilin)	COIL CLN80		K13150;	0.0334704	0.0133943	0.125272	0.198623	-0.152964	-0.0131759	-0.0601051	-0.255379	-0.182855	0.0307473	0.915082	0.204577
COMD3_HUMAN	Q9UBI1	2	COMM domain-containing protein 3 (Protein Bup) (Protein PIL)	COMMD3 BUP C10orf8	neutrophil degranulation [GO:0043312]; regulation of transcription, DNA-templated [GO:0006355]; sodium ion transport [GO:0006814]; transcription, DNA-templated [GO:0006351]	K22559;	0.126101	0.0980614	-0.54388	-0.686639	0.13846	0.258191	0.144291	0.0361902	0.0726038	0.631181	0.936547	0.0683194
COMD9_HUMAN	Q9P000	3	COMM domain-containing protein 9	COMMD9 HSPC166	cholesterol homeostasis [GO:0042632]; neutrophil degranulation [GO:0043312]; regulation of transcription, DNA-templated [GO:0006355]; sodium ion transport [GO:0006814]; transcription, DNA-templated [GO:0006351]	K22565;	-0.00955749	0.0828527	-0.0638527	0.0302926	-0.00178386	0.0322755	0.0202033	-0.190171	-0.0652251	0.586038	0.96272	0.831334
COMT_HUMAN	P21964	6	Catechol O-methyltransferase (EC 2.1.1.6)	COMT	catecholamine catabolic process [GO:0042424]; cellular response to phosphate starvation [GO:0016036]; developmental process [GO:0032502]; dopamine catabolic process [GO:0042420]; estrogen metabolic process [GO:0008210]; female pregnancy [GO:0007565]; learning [GO:0007612]; methylation [GO:0032259]; multicellular organismal reproductive process [GO:0048609]; negative regulation of dopamine metabol…	K00545;	-0.0125853	-0.0897247	-0.102352	-0.0599637	0.0755638	0.0611591	0.0904792	-0.0161374	0.092178	0.34626	0.981332	0.85573
COPA_HUMAN	P53621	31	Coatomer subunit alpha (Alpha-coat protein) (Alpha-COP) (HEP-COP) (HEPCOP) [Cleaved into: Xenin (Xenopsin-related peptide); Proxenin]	COPA	ER to Golgi vesicle-mediated transport [GO:0006888]; intracellular protein transport [GO:0006886]; intra-Golgi vesicle-mediated transport [GO:0006891]; pancreatic juice secretion [GO:0030157]; retrograde vesicle-mediated transport, Golgi to ER [GO:0006890]	K05236;	-0.0778802	-0.0856058	-0.112587	-0.035262	0.0708797	0.0511763	0.0668946	0.0627988	0.132002	0.0128858	0.997926	0.788335
COPB_HUMAN	P53618	24	Coatomer subunit beta (Beta-coat protein) (Beta-COP)	COPB1 COPB MSTP026	ER to Golgi vesicle-mediated transport [GO:0006888]; intracellular protein transport [GO:0006886]; intra-Golgi vesicle-mediated transport [GO:0006891]; neutrophil degranulation [GO:0043312]; retrograde vesicle-mediated transport, Golgi to ER [GO:0006890]; viral process [GO:0016032]	K17301;	-0.0776503	-0.00592786	-0.0280251	-0.0255328	0.0394961	0.058812	0.0241018	0.0208561	0.0881879	0.0822159	0.988285	0.676674
COPB2_HUMAN	P35606	27	Coatomer subunit beta' (Beta'-coat protein) (Beta'-COP) (p102)	COPB2	ER to Golgi vesicle-mediated transport [GO:0006888]; intracellular protein transport [GO:0006886]; intra-Golgi vesicle-mediated transport [GO:0006891]; retrograde vesicle-mediated transport, Golgi to ER [GO:0006890]; toxin transport [GO:1901998]	K17302;	-0.0407148	-0.0258083	-0.0308931	-0.0318456	0.0407764	0.0319658	0.0149742	0.0292678	0.0835417	0.044287	0.999413	0.97596
COPD_HUMAN	P48444	15	Coatomer subunit delta (Archain) (Delta-coat protein) (Delta-COP)	ARCN1 COPD	adult locomotory behavior [GO:0008344]; cerebellar Purkinje cell layer maturation [GO:0021691]; ER to Golgi vesicle-mediated transport [GO:0006888]; intracellular protein transport [GO:0006886]; pigmentation [GO:0043473]; retrograde vesicle-mediated transport, Golgi to ER [GO:0006890]	K20471;	-0.0451541	-0.0478622	-0.0525244	-0.0640991	0.0659993	0.0259083	0.0277031	0.0494117	0.100192	0.0200964	0.982944	0.999806
COPE_HUMAN	O14579	9	Coatomer subunit epsilon (Epsilon-coat protein) (Epsilon-COP)	COPE	ER to Golgi vesicle-mediated transport [GO:0006888]; intra-Golgi vesicle-mediated transport [GO:0006891]; protein transport [GO:0015031]; retrograde vesicle-mediated transport, Golgi to ER [GO:0006890]	K17268;	-0.0129895	0.0282199	-0.0102513	-0.0279947	0.008997	-0.104859	0.0263983	-0.0365879	0.0363141	0.526062	0.85626	0.94478
COPG1_HUMAN	Q9Y678	17	Coatomer subunit gamma-1 (Gamma-1-coat protein) (Gamma-1-COP)	COPG1 COPG	ER to Golgi vesicle-mediated transport [GO:0006888]; establishment of Golgi localization [GO:0051683]; intracellular protein transport [GO:0006886]; organelle transport along microtubule [GO:0072384]; retrograde vesicle-mediated transport, Golgi to ER [GO:0006890]	K17267;	-0.0304629	0.0418214	0.0411286	0.0663043	-0.031201	-0.0325568	-0.0190035	-0.011302	-0.0246887	0.656474	0.981332	0.545879
COPG2_HUMAN	Q9UBF2	12	Coatomer subunit gamma-2 (Gamma-2-coat protein) (Gamma-2-COP)	COPG2	ER to Golgi vesicle-mediated transport [GO:0006888]; intracellular protein transport [GO:0006886]; intra-Golgi vesicle-mediated transport [GO:0006891]; retrograde vesicle-mediated transport, Golgi to ER [GO:0006890]	K17267;	-0.214585	-0.145301	-0.217962	-0.276781	0.13826	0.216518	0.264051	0.218314	0.377864	0.000635078	0.970538	0.698665
COPZ1_HUMAN	P61923	5	Coatomer subunit zeta-1 (Zeta-1-coat protein) (Zeta-1 COP)	COPZ1 COPZ CGI-120 HSPC181	ER to Golgi vesicle-mediated transport [GO:0006888]; intracellular protein transport [GO:0006886]; intra-Golgi vesicle-mediated transport [GO:0006891]; retrograde vesicle-mediated transport, Golgi to ER [GO:0006890]; toxin transport [GO:1901998]	K20472;	-0.0118629	0.0139129	-0.0219812	-0.0508833	0.0362677	0.072341	0.00942269	-0.0263437	0.0759753	0.319238	0.988285	0.763553
COQ9_HUMAN	O75208	2	Ubiquinone biosynthesis protein COQ9, mitochondrial	COQ9 C16orf49 HSPC326 PSEC0129	mitochondrial electron transport, NADH to ubiquinone [GO:0006120]; ubiquinone biosynthetic process [GO:0006744]	K18587;	-0.0538073	0.0370839	-0.0343738	-0.0603619	0.072209	-0.00654839	0.145704	-0.0376602	0.0695258	0.484437	0.85626	0.952129
COR1A_HUMAN	P31146	2	Coronin-1A (Coronin-like protein A) (Clipin-A) (Coronin-like protein p57) (Tryptophan aspartate-containing coat protein) (TACO)	CORO1A CORO1	actin cytoskeleton organization [GO:0030036]; actin filament organization [GO:0007015]; calcium ion transport [GO:0006816]; cell-substrate adhesion [GO:0031589]; cellular response to interleukin-4 [GO:0071353]; early endosome to recycling endosome transport [GO:0061502]; homeostasis of number of cells within a tissue [GO:0048873]; innate immune response [GO:0045087]; leukocyte chemotaxis [GO:0030…	K13882;	0.20667	0.145824	0.111148	0.190969	-0.202112	-0.245223	-0.331064	-0.158885	-0.398853	0.000296105	0.970538	0.827386
COR1B_HUMAN	Q9BR76	9	Coronin-1B (Coronin-2)	CORO1B	actin cytoskeleton organization [GO:0030036]; actin filament branching [GO:0090135]; actin filament bundle assembly [GO:0051017]; cell migration [GO:0016477]; cellular response to platelet-derived growth factor stimulus [GO:0036120]; endothelial cell chemotaxis [GO:0035767]; negative regulation of Arp2/3 complex-mediated actin nucleation [GO:0034316]; negative regulation of smooth muscle cell che…	K13886;	0.0715256	0.0748372	0.0667772	0.00381436	-0.0865333	-0.067742	-0.0822082	-0.114207	-0.164497	0.00058385	0.988285	0.868787
COR1C_HUMAN	Q9ULV4	8	Coronin-1C (Coronin-3) (hCRNN4)	CORO1C CRN2 CRNN4	actin cytoskeleton organization [GO:0030036]; activation of GTPase activity [GO:0090630]; establishment of protein localization [GO:0045184]; negative regulation of epithelial cell migration [GO:0010633]; negative regulation of focal adhesion assembly [GO:0051895]; negative regulation of protein kinase activity by regulation of protein phosphorylation [GO:0044387]; negative regulation of protein …	K13886;	0.0347382	0.0508734	0.0303776	0.00927459	0.00178388	-0.142889	-0.0434003	-0.0346287	-0.0220374	0.709669	0.915082	0.948783
CORO7_HUMAN	P57737	5	Coronin-7 (Crn7) (70 kDa WD repeat tumor rejection antigen homolog)	CORO7	actin filament polymerization [GO:0030041]; Golgi to endosome transport [GO:0006895]; protein transport [GO:0015031]	K18619;	-0.0533724	-0.16607	-0.148546	-0.00628482	0.00189608	0.0386928	0.0727062	0.11264	0.125828	0.268543	0.993272	0.400657
COT2_HUMAN	P24468	2	COUP transcription factor 2 (COUP-TF2) (Apolipoprotein A-I regulatory protein 1) (ARP-1) (COUP transcription factor II) (COUP-TF II) (Nuclear receptor subfamily 2 group F member 2)	NR2F2 ARP1 TFCOUP2	anterior/posterior pattern specification [GO:0009952]; blood vessel morphogenesis [GO:0048514]; fertilization [GO:0009566]; forebrain development [GO:0030900]; limb development [GO:0060173]; lipid metabolic process [GO:0006629]; maternal placenta development [GO:0001893]; negative regulation of cyclin-dependent protein serine/threonine kinase activity [GO:0045736]; negative regulation of endothel…	K08548;	0.0231858	-0.0621088	-0.077685	0.00535938	0.094742	0.101673	0.0905979	-0.128874	0.109784	0.357358	0.936547	0.833384
COTL1_HUMAN	Q14019	11	Coactosin-like protein	COTL1 CLP	defense response to fungus [GO:0050832]; neutrophil degranulation [GO:0043312]		0.33976	0.355972	0.234973	0.33302	-0.387653	-0.475654	-0.411004	-0.383779	-0.737329	8.79721e-10	0.954578	0.690989
COX2_HUMAN	P00403	5	Cytochrome c oxidase subunit 2 (Cytochrome c oxidase polypeptide II)	MT-CO2 COII COX2 COXII MTCO2	ATP synthesis coupled electron transport [GO:0042773]; lactation [GO:0007595]; mitochondrial electron transport, cytochrome c to oxygen [GO:0006123]; positive regulation of ATP biosynthetic process [GO:2001171]; positive regulation of hydrogen peroxide biosynthetic process [GO:0010729]; positive regulation of necrotic cell death [GO:0010940]; response to cold [GO:0009409]	K02261;	-0.0876581	-0.0503363	-0.063079	-0.151301	0.0839261	0.0961702	0.133635	0.0232411	0.194253	0.0147919	0.957264	0.707348
COX41_HUMAN	P13073	8	Cytochrome c oxidase subunit 4 isoform 1, mitochondrial (Cytochrome c oxidase polypeptide IV) (Cytochrome c oxidase subunit IV isoform 1) (COX IV-1)	COX4I1 COX4	generation of precursor metabolites and energy [GO:0006091]; mitochondrial electron transport, cytochrome c to oxygen [GO:0006123]; response to nutrient [GO:0007584]	K02263;	-0.0466454	-0.0016964	-0.0564752	-0.0528443	0.0542797	0.0160405	0.0608319	-0.0355414	0.0998527	0.112105	0.988285	0.891377
COX5A_HUMAN	P20674	7	Cytochrome c oxidase subunit 5A, mitochondrial (Cytochrome c oxidase polypeptide Va)	COX5A	mitochondrial electron transport, cytochrome c to oxygen [GO:0006123]	K02264;	0.0181314	0.00856391	0.0205466	-0.0312569	-0.00389375	-0.0263292	0.0221535	0.0170953	-0.00317915	0.96552	0.997926	0.65554
COX5B_HUMAN	P10606	8	Cytochrome c oxidase subunit 5B, mitochondrial (Cytochrome c oxidase polypeptide Vb)	COX5B	mitochondrial ATP synthesis coupled proton transport [GO:0042776]; mitochondrial electron transport, cytochrome c to oxygen [GO:0006123]; respiratory gaseous exchange [GO:0007585]	K02265;	-0.0338651	-0.0962031	-0.009617	-0.0299028	0.0601942	0.041263	0.0278443	0.0231208	0.0878338	0.121063	0.997926	0.705966
COX6C_HUMAN	P09669	4	Cytochrome c oxidase subunit 6C (Cytochrome c oxidase polypeptide VIc)	COX6C	generation of precursor metabolites and energy [GO:0006091]	K02268;	0.00380332	-0.082109	-0.14384	-0.17191	0.142856	0.0368162	0.0465897	0.0835321	0.0971042	0.456851	0.993272	0.51482
COX7R_HUMAN	O14548	2	Cytochrome c oxidase subunit 7A-related protein, mitochondrial (COX7a-related protein) (Cytochrome c oxidase subunit VIIa-related protein) (EB1)	COX7A2L COX7AR COX7RP		K02270;	0.0853573	-0.0620906	0.125019	0.0421741	-0.0794251	-0.00345828	0.040084	-0.118168	-0.17636	0.0675903	0.936547	0.487857
CP062_HUMAN	Q7Z3J2	4	UPF0505 protein C16orf62 (Esophageal cancer-associated protein)	C16orf62 101F10.2	Golgi to plasma membrane transport [GO:0006893]; neutrophil degranulation [GO:0043312]; protein transport [GO:0015031]		-0.146455	-0.0517164	-0.0315661	-0.0439997	0.127592	0.155409	-0.0141743	0.0623377	0.247249	0.0463561	0.849929	0.934611
CP51A_HUMAN	Q16850	4	Lanosterol 14-alpha demethylase (LDM) (EC 1.14.13.70) (CYPLI) (Cytochrome P450 51A1) (Cytochrome P450-14DM) (Cytochrome P45014DM) (Cytochrome P450LI) (Sterol 14-alpha demethylase)	CYP51A1 CYP51	cholesterol biosynthetic process [GO:0006695]; cholesterol biosynthetic process via 24,25-dihydrolanosterol [GO:0033488]; regulation of cholesterol biosynthetic process [GO:0045540]; steroid biosynthetic process [GO:0006694]; sterol metabolic process [GO:0016125]	K05917;	0.103691	0.0480016	0.0481567	0.240296	-0.162167	-0.196937	-0.172144	-0.00939931	-0.207683	0.180819	0.808593	0.476683
CPIN1_HUMAN	Q6FI81	7	Anamorsin (Cytokine-induced apoptosis inhibitor 1) (Fe-S cluster assembly protein DRE2 homolog)	CIAPIN1 CUA001 PRO0915	apoptotic process [GO:0006915]; hemopoiesis [GO:0030097]; iron-sulfur cluster assembly [GO:0016226]; negative regulation of apoptotic process [GO:0043066]	K22746;	0.170061	0.113881	0.1248	0.0777819	-0.12876	-0.209504	-0.20203	-0.15887	-0.310154	0.000532605	0.990919	0.747078
CPNE1_HUMAN	Q99829	12	Copine-1 (Chromobindin 17) (Copine I)	CPNE1 CPN1	cellular response to calcium ion [GO:0071277]; glycerophospholipid biosynthetic process [GO:0046474]; lipid metabolic process [GO:0006629]; negative regulation of DNA binding [GO:0043392]; negative regulation of gene expression [GO:0010629]; negative regulation of NIK/NF-kappaB signaling [GO:1901223]; neuron projection extension [GO:1990138]; neutrophil degranulation [GO:0043312]; positive regula…		-0.124585	-0.117921	-0.142588	-0.189386	0.098658	0.0892994	0.0845042	0.137742	0.235285	0.00373063	0.988285	0.904037
CPNE2_HUMAN	Q96FN4	2	Copine-2 (Copine II)	CPNE2	cellular response to calcium ion [GO:0071277]		-0.0410744	-0.0819154	0.0493268	-0.221595	0.0730689	0.158077	0.0349786	0.0130552	0.150881	0.104444	0.934909	0.504097
CPNE3_HUMAN	O75131	8	Copine-3 (Copine III)	CPNE3 CPN3 KIAA0636	cellular response to calcium ion [GO:0071277]; cellular response to growth factor stimulus [GO:0071363]; ERBB2 signaling pathway [GO:0038128]; glycerophospholipid biosynthetic process [GO:0046474]; lipid metabolic process [GO:0006629]; neutrophil degranulation [GO:0043312]; positive regulation of cell migration [GO:0030335]; vesicle-mediated transport [GO:0016192]		-0.134131	-0.0770962	-0.024275	0.000772777	0.0366298	0.102184	0.119802	0.131468	0.179013	0.0191926	0.988285	0.697691
CPNS1_HUMAN	P04632	7	Calpain small subunit 1 (CSS1) (Calcium-activated neutral proteinase small subunit) (CANP small subunit) (Calcium-dependent protease small subunit) (CDPS) (Calcium-dependent protease small subunit 1) (Calpain regulatory subunit)	CAPNS1 CAPN4 CAPNS	cornification [GO:0070268]; positive regulation of cell proliferation [GO:0008284]; regulation of macroautophagy [GO:0016241]	K08583;	-0.0786337	0.0306517	-0.0888966	-0.0862118	0.0377506	0.0311704	0.0596205	-0.0527574	0.187756	0.05682	0.981332	0.787613
CPPED_HUMAN	Q9BRF8	5	Serine/threonine-protein phosphatase CPPED1 (EC 3.1.3.16) (Calcineurin-like phosphoesterase domain-containing protein 1) (Complete S-transactivated protein 1)	CPPED1 CSTP1	neutrophil degranulation [GO:0043312]	K21814;	0.151188	0.126374	-0.00319877	0.0966531	-0.0958014	-0.12086	-0.147798	-0.126466	-0.236743	0.00342646	0.988285	0.418338
CPSF1_HUMAN	Q10570	13	Cleavage and polyadenylation specificity factor subunit 1 (Cleavage and polyadenylation specificity factor 160 kDa subunit) (CPSF 160 kDa subunit)	CPSF1 CPSF160	mRNA 3'-end processing [GO:0031124]; mRNA cleavage [GO:0006379]; mRNA export from nucleus [GO:0006406]; mRNA polyadenylation [GO:0006378]; mRNA splicing, via spliceosome [GO:0000398]; pre-mRNA cleavage required for polyadenylation [GO:0098789]; termination of RNA polymerase II transcription [GO:0006369]	K14401;	0.0949945	0.071352	-0.00342066	-0.0657557	-0.0846177	-0.0112668	-0.0175308	0.00604478	-0.163863	0.0218938	0.957173	0.371327
CPSF2_HUMAN	Q9P2I0	7	Cleavage and polyadenylation specificity factor subunit 2 (Cleavage and polyadenylation specificity factor 100 kDa subunit) (CPSF 100 kDa subunit)	CPSF2 CPSF100 KIAA1367	mRNA 3'-end processing [GO:0031124]; mRNA 3'-end processing by stem-loop binding and cleavage [GO:0006398]; mRNA cleavage [GO:0006379]; mRNA export from nucleus [GO:0006406]; mRNA polyadenylation [GO:0006378]; mRNA splicing, via spliceosome [GO:0000398]; termination of RNA polymerase II transcription [GO:0006369]	K14402;	0.0757492	0.0331828	-0.0233167	0.00852852	-0.0422374	-0.052745	-0.0661789	-0.109797	-0.0788691	0.461593	0.988285	0.866166
CPSF3_HUMAN	Q9UKF6	8	Cleavage and polyadenylation specificity factor subunit 3 (EC 3.1.27.-) (Cleavage and polyadenylation specificity factor 73 kDa subunit) (CPSF 73 kDa subunit) (mRNA 3'-end-processing endonuclease CPSF-73)	CPSF3 CPSF73	mRNA 3'-end processing [GO:0031124]; mRNA 3'-end processing by stem-loop binding and cleavage [GO:0006398]; mRNA cleavage [GO:0006379]; mRNA export from nucleus [GO:0006406]; mRNA polyadenylation [GO:0006378]; mRNA splicing, via spliceosome [GO:0000398]; termination of RNA polymerase II transcription [GO:0006369]	K14403;	0.128686	0.205149	0.0127296	0.020661	-0.0915954	-0.069399	-0.153328	-0.0967673	-0.219622	0.0151572	0.978908	0.419898
CPSF5_HUMAN	O43809	12	Cleavage and polyadenylation specificity factor subunit 5 (Cleavage and polyadenylation specificity factor 25 kDa subunit) (CPSF 25 kDa subunit) (Cleavage factor Im complex 25 kDa subunit) (CFIm25) (Nucleoside diphosphate-linked moiety X motif 21) (Nudix motif 21) (Nudix hydrolase 21) (Pre-mRNA cleavage factor Im 68 kDa subunit)	NUDT21 CFIM25 CPSF25 CPSF5	cell differentiation [GO:0030154]; messenger ribonucleoprotein complex assembly [GO:1990120]; mRNA 3'-end processing [GO:0031124]; mRNA alternative polyadenylation [GO:0110104]; mRNA polyadenylation [GO:0006378]; mRNA processing [GO:0006397]; mRNA splicing, via spliceosome [GO:0000398]; positive regulation of mRNA cleavage [GO:0031439]; positive regulation of mRNA polyadenylation [GO:1900365]; po…	K14397;	-0.0836525	-0.069534	-0.0273055	0.00484881	-0.0234838	0.0446267	0.0311182	0.0333979	0.0822545	0.101814	0.978908	0.43537
CPSF6_HUMAN	Q16630	8	Cleavage and polyadenylation specificity factor subunit 6 (Cleavage and polyadenylation specificity factor 68 kDa subunit) (CPSF 68 kDa subunit) (Cleavage factor Im complex 68 kDa subunit) (CFIm68) (Pre-mRNA cleavage factor Im 68 kDa subunit) (Protein HPBRII-4/7)	CPSF6 CFIM68	messenger ribonucleoprotein complex assembly [GO:1990120]; mRNA alternative polyadenylation [GO:0110104]; mRNA processing [GO:0006397]; positive regulation of RNA export from nucleus [GO:0046833]; pre-mRNA cleavage required for polyadenylation [GO:0098789]; protein heterotetramerization [GO:0051290]; protein tetramerization [GO:0051262]	K14398;	-0.0100589	-0.049741	-0.0842203	-0.103251	0.0128561	0.0349735	0.0263904	0.0444535	0.0414011	0.440033	0.997631	0.637444
CPSF7_HUMAN	Q8N684	10	Cleavage and polyadenylation specificity factor subunit 7 (Cleavage and polyadenylation specificity factor 59 kDa subunit) (CPSF 59 kDa subunit) (Cleavage factor Im complex 59 kDa subunit) (CFIm59) (Pre-mRNA cleavage factor Im 59 kDa subunit)	CPSF7	messenger ribonucleoprotein complex assembly [GO:1990120]; mRNA 3'-end processing [GO:0031124]; mRNA alternative polyadenylation [GO:0110104]; mRNA splicing, via spliceosome [GO:0000398]; pre-mRNA cleavage required for polyadenylation [GO:0098789]; protein heterotetramerization [GO:0051290]; protein tetramerization [GO:0051262]; termination of RNA polymerase II transcription [GO:0006369]	K14398;	-0.0752992	-0.051391	-0.043606	-0.0479826	-0.0293385	0.0409217	0.0649485	-0.0438609	0.0606084	0.293943	0.981332	0.98268
CPT1A_HUMAN	P50416	11	Carnitine O-palmitoyltransferase 1, liver isoform (CPT1-L) (EC 2.3.1.21) (Carnitine O-palmitoyltransferase I, liver isoform) (CPT I) (CPTI-L) (Carnitine palmitoyltransferase 1A)	CPT1A CPT1	carnitine metabolic process [GO:0009437]; carnitine shuttle [GO:0006853]; cellular response to fatty acid [GO:0071398]; circadian rhythm [GO:0007623]; eating behavior [GO:0042755]; epithelial cell differentiation [GO:0030855]; fatty acid beta-oxidation [GO:0006635]; glucose metabolic process [GO:0006006]; long-chain fatty acid metabolic process [GO:0001676]; positive regulation of fatty acid beta…	K08765;	0.0789525	0.00567638	0.0802506	0.0887403	-0.061454	-0.0949493	0.017263	-0.0207478	-0.158893	0.0312839	0.954578	0.645663
CPT2_HUMAN	P23786	6	Carnitine O-palmitoyltransferase 2, mitochondrial (EC 2.3.1.21) (Carnitine palmitoyltransferase II) (CPT II)	CPT2 CPT1	carnitine shuttle [GO:0006853]; fatty acid beta-oxidation [GO:0006635]; positive regulation of cold-induced thermogenesis [GO:0120162]; regulation of lipid metabolic process [GO:0019216]	K08766;	-0.0824961	-0.110667	-0.0657951	-0.0878108	0.151242	0.0757124	0.0743869	-0.0201808	0.19601	0.0245923	0.97757	0.941712
CPVL_HUMAN	Q9H3G5	6	Probable serine carboxypeptidase CPVL (EC 3.4.16.-) (Carboxypeptidase, vitellogenic-like) (Vitellogenic carboxypeptidase-like protein) (VCP-like protein) (hVLP)	CPVL VLP PSEC0124 UNQ197/PRO223	proteolysis involved in cellular protein catabolic process [GO:0051603]	K09645;	-0.618641	-0.788571	-0.693628	-0.69819	0.458715	0.512812	0.405185	0.359973	1.08383	7.91709e-09	0.85626	0.795449
CRBG1_HUMAN	Q9Y4K1	6	Beta/gamma crystallin domain-containing protein 1 (Absent in melanoma 1 protein)	CRYBG1 AIM1			0.0864797	0.173604	0.177255	0.180535	-0.186708	-0.221728	-0.182787	-0.224228	-0.284315	0.00311172	0.997926	0.766027
CREB1_HUMAN	P16220	3	Cyclic AMP-responsive element-binding protein 1 (CREB-1) (cAMP-responsive element-binding protein 1)	CREB1	aging [GO:0007568]; axonogenesis [GO:0007409]; cellular response to fatty acid [GO:0071398]; cellular response to hepatocyte growth factor stimulus [GO:0035729]; cellular response to insulin-like growth factor stimulus [GO:1990314]; cellular response to leukemia inhibitory factor [GO:1990830]; cellular response to nerve growth factor stimulus [GO:1990090]; cellular response to platelet-derived gr…	K05870;	0.202935	0.135933	-1.42457	-0.886977	0.323195	0.0656036	0.590871	0.432159	0.00227467	0.996127	0.85626	0.0991827
CRIP2_HUMAN	P52943	2	Cysteine-rich protein 2 (CRP-2) (Protein ESP1)	CRIP2 CRP2	hemopoiesis [GO:0030097]; positive regulation of cell proliferation [GO:0008284]		-0.756931	-0.687492	-0.705394	-0.648768	0.437536	0.464737	0.524263	0.445326	1.13519	7.4397e-08	0.997926	0.809188
CRK_HUMAN	P46108	8	Adapter molecule crk (Proto-oncogene c-Crk) (p38)	CRK	activation of MAPKK activity [GO:0000186]; cellular response to endothelin [GO:1990859]; cellular response to insulin-like growth factor stimulus [GO:1990314]; cellular response to nerve growth factor stimulus [GO:1990090]; cellular response to nitric oxide [GO:0071732]; cellular response to transforming growth factor beta stimulus [GO:0071560]; cytokine-mediated signaling pathway [GO:0019221]; e…	K04438;	0.0244295	0.0324356	-0.0620127	-0.00678866	0.050868	-0.0166207	-0.0208462	0.0278176	0.0685109	0.307157	0.944099	0.58577
CRKL_HUMAN	P46109	12	Crk-like protein	CRKL	activation of MAPKK activity [GO:0000186]; animal organ morphogenesis [GO:0009887]; anterior/posterior pattern specification [GO:0009952]; blood vessel development [GO:0001568]; cellular response to transforming growth factor beta stimulus [GO:0071560]; cytokine-mediated signaling pathway [GO:0019221]; heart development [GO:0007507]; intracellular signal transduction [GO:0035556]; JNK cascade [GO…	K04438;	-0.105833	-0.133843	-0.20972	-0.236186	0.193696	0.195033	0.196279	0.128005	0.333942	8.52453e-05	0.934909	0.660177
CRLF3_HUMAN	Q8IUI8	2	Cytokine receptor-like factor 3 (Cytokine receptor-like molecule 9) (CREME-9) (Cytokine receptor-related protein 4) (Type I cytokine receptor-like factor p48)	CRLF3 CREME9 CRLM9 CYTOR4 P48	G1/S transition of mitotic cell cycle [GO:0000082]; negative regulation of cell growth [GO:0030308]; positive regulation of cell cycle arrest [GO:0071158]; positive regulation of JAK-STAT cascade [GO:0046427]; positive regulation of transcription, DNA-templated [GO:0045893]; positive regulation of transcription by RNA polymerase II [GO:0045944]		-0.0347342	-0.0248216	-0.0381379	-0.0592021	0.0385362	0.0961509	-0.0477475	0.0393974	0.0897175	0.309592	0.936547	0.988333
CRNL1_HUMAN	Q9BZJ0	7	Crooked neck-like protein 1 (Crooked neck homolog) (hCrn)	CRNKL1 CRN CGI-201 MSTP021	mRNA splicing, via spliceosome [GO:0000398]; spliceosomal complex assembly [GO:0000245]	K12869;	-0.0578805	-0.0725064	-0.0980779	-0.140632	0.0434567	0.103786	0.0932821	0.0475013	0.109194	0.0811563	0.978908	0.764117
CRTAP_HUMAN	O75718	3	Cartilage-associated protein	CRTAP CASP	chaperone-mediated protein folding [GO:0061077]; negative regulation of post-translational protein modification [GO:1901874]; peptidyl-proline hydroxylation to 3-hydroxy-L-proline [GO:0018400]; protein stabilization [GO:0050821]; spermatogenesis [GO:0007283]	K19606;	0.000885697	-0.00542547	0.0562412	-0.0534055	0.0949304	0.125699	-0.0560841	0.00933963	0.0310058	0.820283	0.872304	0.957862
CSCL1_HUMAN	O94886	2	CSC1-like protein 1 (Transmembrane protein 63A)	TMEM63A KIAA0489 KIAA0792	ion transport [GO:0006811]; neutrophil degranulation [GO:0043312]	K21989;	0.0585382	-0.00935701	-0.0530017	-0.0677704	-0.058983	0.0958365	0.00740635	0.0576681	-0.118478	0.0354074	0.808593	0.353522
CSDE1_HUMAN	O75534	18	Cold shock domain-containing protein E1 (N-ras upstream gene protein) (Protein UNR)	CSDE1 D1S155E KIAA0885 NRU UNR	male gonad development [GO:0008584]; nuclear-transcribed mRNA catabolic process, no-go decay [GO:0070966]; regulation of transcription, DNA-templated [GO:0006355]		0.154046	0.289431	0.214428	0.30521	-0.290771	-0.293617	-0.260399	-0.21384	-0.436618	2.95765e-07	0.94917	0.384705
CSK_HUMAN	P41240	7	Tyrosine-protein kinase CSK (EC 2.7.10.2) (C-Src kinase) (Protein-tyrosine kinase CYL)	CSK	adaptive immune response [GO:0002250]; adherens junction organization [GO:0034332]; brain development [GO:0007420]; cell differentiation [GO:0030154]; cellular response to peptide hormone stimulus [GO:0071375]; central nervous system development [GO:0007417]; innate immune response [GO:0045087]; negative regulation of bone resorption [GO:0045779]; negative regulation of cell proliferation [GO:000…	K05728;	0.133415	0.144235	0.0715469	0.0523145	-0.0704578	-0.0778147	-0.102731	-0.0809026	-0.208038	0.000275592	0.991772	0.405055
CSK21_HUMAN	P68400	14	Casein kinase II subunit alpha (CK II alpha) (EC 2.7.11.1)	CSNK2A1 CK2A1	apoptotic process [GO:0006915]; cell cycle [GO:0007049]; chaperone-mediated protein folding [GO:0061077]; negative regulation of apoptotic signaling pathway [GO:2001234]; negative regulation of cysteine-type endopeptidase activity involved in apoptotic process [GO:0043154]; negative regulation of ubiquitin-dependent protein catabolic process [GO:2000059]; peptidyl-serine phosphorylation [GO:00181…	K03097;	0.0245062	-0.0780714	-0.00103758	0.0555301	-0.00837467	0.0104904	-0.0123832	0.0251023	-0.0108211	0.858441	0.993272	0.593862
CSK22_HUMAN	P19784	9	Casein kinase II subunit alpha' (CK II alpha') (EC 2.7.11.1)	CSNK2A2 CK2A2	apoptotic process [GO:0006915]; cell cycle [GO:0007049]; cerebral cortex development [GO:0021987]; liver regeneration [GO:0097421]; negative regulation of apoptotic signaling pathway [GO:2001234]; negative regulation of ubiquitin-dependent protein catabolic process [GO:2000059]; peptidyl-serine phosphorylation [GO:0018105]; positive regulation of protein targeting to mitochondrion [GO:1903955]; r…	K03097;	0.0582442	0.0698698	0.011863	0.0292445	-0.0169311	-0.0391361	-0.00549582	-0.0188733	-0.106194	0.0675903	0.981332	0.787613
CSKP_HUMAN	O14936	4	Peripheral plasma membrane protein CASK (hCASK) (EC 2.7.11.1) (Calcium/calmodulin-dependent serine protein kinase) (Protein lin-2 homolog)	CASK LIN2	cell adhesion [GO:0007155]; negative regulation of cell-matrix adhesion [GO:0001953]; negative regulation of cellular response to growth factor stimulus [GO:0090288]; negative regulation of keratinocyte proliferation [GO:0010839]; negative regulation of wound healing [GO:0061045]; neurotransmitter secretion [GO:0007269]	K06103;	-0.510163	-0.483359	-0.371672	-0.41528	0.417974	0.445678	0.328839	0.230676	0.829552	3.8365e-05	0.897178	0.869578
CSN1_HUMAN	Q13098	10	COP9 signalosome complex subunit 1 (SGN1) (Signalosome subunit 1) (G protein pathway suppressor 1) (GPS-1) (JAB1-containing signalosome subunit 1) (Protein MFH)	GPS1 COPS1 CSN1	inactivation of MAPK activity [GO:0000188]; JNK cascade [GO:0007254]; nucleotide-excision repair, DNA damage recognition [GO:0000715]; post-translational protein modification [GO:0043687]; protein deneddylation [GO:0000338]; transcription-coupled nucleotide-excision repair [GO:0006283]	K12175;	0.0752191	0.0803874	0.100491	0.0683651	-0.0839701	-0.0759297	-0.105929	-0.12769	-0.170602	0.000939747	0.990919	0.94688
CSN2_HUMAN	P61201	15	COP9 signalosome complex subunit 2 (SGN2) (Signalosome subunit 2) (Alien homolog) (JAB1-containing signalosome subunit 2) (Thyroid receptor-interacting protein 15) (TR-interacting protein 15) (TRIP-15)	COPS2 CSN2 TRIP15	cell proliferation [GO:0008283]; negative regulation of nucleic acid-templated transcription [GO:1903507]; negative regulation of transcription, DNA-templated [GO:0045892]; negative regulation of transcription by RNA polymerase II [GO:0000122]; neurogenesis [GO:0022008]; neuron differentiation [GO:0030182]; nucleotide-excision repair, DNA damage recognition [GO:0000715]; post-translational protei…	K12176;	0.047925	0.0876154	0.0760843	0.101586	-0.120747	-0.0981841	-0.122973	-0.030643	-0.157634	0.00157049	0.841996	0.901942
CSN3_HUMAN	Q9UNS2	6	COP9 signalosome complex subunit 3 (SGN3) (Signalosome subunit 3) (JAB1-containing signalosome subunit 3)	COPS3 CSN3	in utero embryonic development [GO:0001701]; nucleotide-excision repair, DNA damage recognition [GO:0000715]; post-translational protein modification [GO:0043687]; protein deneddylation [GO:0000338]; response to light stimulus [GO:0009416]; signal transduction [GO:0007165]; transcription-coupled nucleotide-excision repair [GO:0006283]; ubiquitin-dependent protein catabolic process [GO:0006511]	K12177;	0.0545959	0.086686	0.0512419	0.0983045	-0.138089	-0.0738147	-0.137861	-0.077242	-0.181615	0.00979848	0.936547	0.953781
CSN4_HUMAN	Q9BT78	14	COP9 signalosome complex subunit 4 (SGN4) (Signalosome subunit 4) (JAB1-containing signalosome subunit 4)	COPS4 CSN4	nucleotide-excision repair, DNA damage recognition [GO:0000715]; post-translational protein modification [GO:0043687]; protein deneddylation [GO:0000338]; transcription-coupled nucleotide-excision repair [GO:0006283]	K12178;	0.0970529	0.191193	0.0434826	-0.018858	-0.102862	-0.0659322	0.00281613	-0.0833985	-0.150517	0.0622674	0.981332	0.434115
CSN5_HUMAN	Q92905	9	COP9 signalosome complex subunit 5 (SGN5) (Signalosome subunit 5) (EC 3.4.-.-) (Jun activation domain-binding protein 1)	COPS5 CSN5 JAB1	exosomal secretion [GO:1990182]; negative regulation of apoptotic process [GO:0043066]; nucleotide-excision repair, DNA damage recognition [GO:0000715]; positive regulation of DNA-binding transcription factor activity [GO:0051091]; positive regulation of transcription by RNA polymerase II [GO:0045944]; post-translational protein modification [GO:0043687]; protein deneddylation [GO:0000338]; prote…	K09613;	0.0708658	-0.00415249	0.00871728	0.0244713	-0.0768446	-0.0452577	-0.0341987	-0.0238372	-0.0995725	0.102575	0.990919	0.905863
CSN6_HUMAN	Q7L5N1	7	COP9 signalosome complex subunit 6 (SGN6) (Signalosome subunit 6) (JAB1-containing signalosome subunit 6) (MOV34 homolog) (Vpr-interacting protein) (hVIP)	COPS6 CSN6 HVIP	nucleotide-excision repair, DNA damage recognition [GO:0000715]; post-translational protein modification [GO:0043687]; protein deneddylation [GO:0000338]; transcription-coupled nucleotide-excision repair [GO:0006283]; viral process [GO:0016032]	K12179;	0.0426533	0.0729058	0.0814318	0.143423	-0.130182	-0.0467817	-0.163534	-0.069216	-0.124062	0.225127	0.96594	0.797994
CSN7A_HUMAN	Q9UBW8	6	COP9 signalosome complex subunit 7a (SGN7a) (Signalosome subunit 7a) (Dermal papilla-derived protein 10) (JAB1-containing signalosome subunit 7a)	COPS7A CSN7A DERP10	nucleotide-excision repair, DNA damage recognition [GO:0000715]; post-translational protein modification [GO:0043687]; protein deneddylation [GO:0000338]; transcription-coupled nucleotide-excision repair [GO:0006283]	K12180;	0.16358	0.27702	0.155965	0.272375	-0.275294	-0.268566	-0.255106	-0.199895	-0.500051	1.09429e-06	0.957264	0.760995
CSN7B_HUMAN	Q9H9Q2	4	COP9 signalosome complex subunit 7b (SGN7b) (Signalosome subunit 7b) (JAB1-containing signalosome subunit 7b)	COPS7B CSN7B	nucleotide-excision repair, DNA damage recognition [GO:0000715]; post-translational protein modification [GO:0043687]; protein deneddylation [GO:0000338]; transcription-coupled nucleotide-excision repair [GO:0006283]	K12180;	0.0374632	-0.0538702	-0.0978934	-0.0670146	-0.0102221	0.138399	0.03416	0.0509827	-0.0274594	0.706692	0.863371	0.638654
CSN8_HUMAN	Q99627	5	COP9 signalosome complex subunit 8 (SGN8) (Signalosome subunit 8) (COP9 homolog) (hCOP9) (JAB1-containing signalosome subunit 8)	COPS8 CSN8	activation of NF-kappaB-inducing kinase activity [GO:0007250]; COP9 signalosome assembly [GO:0010387]; negative regulation of cell proliferation [GO:0008285]; nucleotide-excision repair, DNA damage recognition [GO:0000715]; post-translational protein modification [GO:0043687]; protein deneddylation [GO:0000338]; protein phosphorylation [GO:0006468]; transcription-coupled nucleotide-excision repai…	K12181;	0.0948003	0.136043	0.0953085	0.154799	-0.0498772	-0.18065	-0.0793538	-0.247782	-0.155327	0.0881812	0.808593	0.955756
CSRP1_HUMAN	P21291	3	Cysteine and glycine-rich protein 1 (Cysteine-rich protein 1) (CRP) (CRP1) (Epididymis luminal protein 141) (HEL-141)	CSRP1 CSRP CYRP	platelet aggregation [GO:0070527]	K09377;	-0.00493711	-0.107493	-0.20118	-0.0450645	0.0446938	0.0689421	0.0848364	0.0970709	0.0100679	0.947378	0.994175	0.711496
CSTF1_HUMAN	Q05048	6	Cleavage stimulation factor subunit 1 (CF-1 50 kDa subunit) (Cleavage stimulation factor 50 kDa subunit) (CSTF 50 kDa subunit) (CstF-50)	CSTF1	mRNA 3'-end processing [GO:0031124]; mRNA splicing, via spliceosome [GO:0000398]; termination of RNA polymerase II transcription [GO:0006369]	K14406;	-0.0401967	0.00533956	0.0451625	-0.0711384	-0.0214085	-0.0507386	-0.015762	0.122718	0.0590422	0.606694	0.981332	0.658938
CSTF2_HUMAN	P33240	9	Cleavage stimulation factor subunit 2 (CF-1 64 kDa subunit) (Cleavage stimulation factor 64 kDa subunit) (CSTF 64 kDa subunit) (CstF-64)	CSTF2	mRNA 3'-end processing [GO:0031124]; mRNA polyadenylation [GO:0006378]; mRNA splicing, via spliceosome [GO:0000398]; pre-mRNA cleavage required for polyadenylation [GO:0098789]; termination of RNA polymerase II transcription [GO:0006369]	K14407;	0.0258909	0.0556835	-0.0203653	-0.0134477	0.0439247	0.0455962	0.0210767	-0.089716	0.0238998	0.714608	0.85626	0.834645
CSTF3_HUMAN	Q12996	7	Cleavage stimulation factor subunit 3 (CF-1 77 kDa subunit) (Cleavage stimulation factor 77 kDa subunit) (CSTF 77 kDa subunit) (CstF-77)	CSTF3	mRNA 3'-end processing [GO:0031124]; mRNA cleavage [GO:0006379]; mRNA polyadenylation [GO:0006378]; mRNA splicing, via spliceosome [GO:0000398]; termination of RNA polymerase II transcription [GO:0006369]	K14408;	-0.0297749	-0.177926	-0.226535	-0.0421229	0.0406956	0.102585	0.115518	0.127622	0.0776763	0.433765	0.981332	0.690989
CTBL1_HUMAN	Q8WYA6	8	Beta-catenin-like protein 1 (Nuclear-associated protein) (NAP) (Testis development protein NYD-SP19)	CTNNBL1 C20orf33 PP8304	apoptotic process [GO:0006915]; mRNA splicing, via spliceosome [GO:0000398]; positive regulation of apoptotic process [GO:0043065]; somatic diversification of immunoglobulins [GO:0016445]	K12864;	0.00247905	-0.00760372	0.00472552	-0.0271366	0.0289684	0.0517655	0.0390299	-0.0573326	0.0257745	0.641862	0.936547	0.92323
CTBP1_HUMAN	Q13363	5	C-terminal-binding protein 1 (CtBP1) (EC 1.1.1.-)	CTBP1 CTBP	negative regulation of cell proliferation [GO:0008285]; negative regulation of histone acetylation [GO:0035067]; negative regulation of histone H4 acetylation [GO:0090241]; negative regulation of transcription, DNA-templated [GO:0045892]; negative regulation of transcription by RNA polymerase II [GO:0000122]; negative regulation of transcription from RNA polymerase II promoter by histone modifica…	K04496;	-0.0533629	-0.263018	-0.130709	-0.238575	0.181564	0.104852	0.120547	0.170919	0.28073	0.0115235	0.988285	0.705966
CTBP2_HUMAN	P56545	9	C-terminal-binding protein 2 (CtBP2)	CTBP2	cellular response to leukemia inhibitory factor [GO:1990830]; negative regulation of cell proliferation [GO:0008285]; negative regulation of transcription, DNA-templated [GO:0045892]; positive regulation of chromatin binding [GO:0035563]; positive regulation of retinoic acid receptor signaling pathway [GO:0048386]; positive regulation of transcription by RNA polymerase II [GO:0045944]; transcript…	K04496;	0.0662723	0.0618323	0.0401261	0.0696819	-0.0785044	-0.0502881	-0.0688665	-0.0573076	-0.161948	0.00309826	0.988285	0.940423
CTF18_HUMAN	Q8WVB6	4	Chromosome transmission fidelity protein 18 homolog (hCTF18) (CHL12)	CHTF18 C16orf41 CTF18	cell cycle [GO:0007049]; DNA replication [GO:0006260]; positive regulation of DNA-directed DNA polymerase activity [GO:1900264]	K11269;	-0.264176	-0.3528	-0.168204	-0.167625	0.296338	0.373569	0.236791	0.178412	0.536883	0.000662104	0.978908	0.787613
CTF8A_HUMAN	P0CG12	4	Chromosome transmission fidelity protein 8 homolog isoform 2 (Decreased expression in renal and prostate cancer protein)	CHTF8 DERPC	mitotic sister chromatid cohesion [GO:0007064]		0.0344119	-0.262562	-0.127525	-0.119789	0.126148	0.130784	0.0508797	0.062977	0.135352	0.132704	0.988285	0.210389
CTL1_HUMAN	Q8WWI5	2	Choline transporter-like protein 1 (CDw92) (Solute carrier family 44 member 1) (CD antigen CD92)	SLC44A1 CD92 CDW92 CTL1	choline catabolic process [GO:0042426]; choline transport [GO:0015871]; phosphatidylcholine biosynthetic process [GO:0006656]; transmembrane transport [GO:0055085]	K06515;	-0.14027	-0.293095	0.0358089	-0.778088	0.374063	0.351668	0.474497	-0.644096	0.373799	0.0932705	0.85626	0.604059
CTL2_HUMAN	Q8IWA5	3	Choline transporter-like protein 2 (Solute carrier family 44 member 2)	SLC44A2 CTL2 PSEC0210	choline transport [GO:0015871]; neutrophil degranulation [GO:0043312]; phosphatidylcholine biosynthetic process [GO:0006656]; positive regulation of I-kappaB kinase/NF-kappaB signaling [GO:0043123]; transmembrane transport [GO:0055085]	K15377;	-0.200761	-0.111585	-0.0654261	-0.0395177	0.207405	0.0229094	0.205471	0.124445	0.364691	0.000422145	0.936547	0.374135
CTNA1_HUMAN	P35221	34	Catenin alpha-1 (Alpha E-catenin) (Cadherin-associated protein) (Renal carcinoma antigen NY-REN-13)	CTNNA1	actin filament organization [GO:0007015]; adherens junction organization [GO:0034332]; aging [GO:0007568]; apical junction assembly [GO:0043297]; axon regeneration [GO:0031103]; cell adhesion [GO:0007155]; cellular protein localization [GO:0034613]; cellular response to indole-3-methanol [GO:0071681]; epithelial cell-cell adhesion [GO:0090136]; establishment or maintenance of cell polarity [GO:00…	K05691;	-0.199452	-0.196719	-0.171894	-0.133202	0.150539	0.148317	0.141783	0.115695	0.344127	2.67393e-07	0.999413	0.739131
CTNB1_HUMAN	P35222	19	Catenin beta-1 (Beta-catenin)	CTNNB1 CTNNB OK/SW-cl.35 PRO2286	adherens junction assembly [GO:0034333]; androgen receptor signaling pathway [GO:0030521]; beta-catenin destruction complex disassembly [GO:1904886]; beta-catenin-TCF complex assembly [GO:1904837]; branching involved in blood vessel morphogenesis [GO:0001569]; canonical Wnt signaling pathway [GO:0060070]; canonical Wnt signaling pathway involved in midbrain dopaminergic neuron differentiation [GO…	K02105;	-0.279362	-0.30338	-0.242217	-0.212159	0.203811	0.257848	0.225239	0.155982	0.49596	4.01271e-09	0.863371	0.705966
CTND1_HUMAN	O60716	23	Catenin delta-1 (Cadherin-associated Src substrate) (CAS) (p120 catenin) (p120(ctn)) (p120(cas))	CTNND1 KIAA0384	adherens junction organization [GO:0034332]; brain development [GO:0007420]; cell adhesion [GO:0007155]; cell-cell adhesion [GO:0098609]; entry of bacterium into host cell [GO:0035635]; negative regulation of canonical Wnt signaling pathway [GO:0090090]; regulation of transcription, DNA-templated [GO:0006355]; transcription, DNA-templated [GO:0006351]; Wnt signaling pathway [GO:0016055]	K05690;	-0.199344	-0.167923	-0.165045	-0.222389	0.161019	0.215519	0.133302	0.133812	0.344022	1.28875e-06	0.981332	0.896573
CTR9_HUMAN	Q6PD62	3	RNA polymerase-associated protein CTR9 homolog (SH2 domain-binding protein 1)	CTR9 KIAA0155 SH2BP1	blastocyst growth [GO:0001832]; cellular response to lipopolysaccharide [GO:0071222]; endodermal cell fate commitment [GO:0001711]; histone H2B ubiquitination [GO:0033523]; histone H3-K4 trimethylation [GO:0080182]; histone monoubiquitination [GO:0010390]; inner cell mass cell differentiation [GO:0001826]; interleukin-6-mediated signaling pathway [GO:0070102]; JAK-STAT cascade [GO:0007259]; negat…	K15176;	0.0538013	-0.203925	-0.13449	-0.0644417	-0.0432181	0.115543	0.0357005	0.0787582	-0.0640505	0.670612	0.981332	0.77873
CTRO_HUMAN	O14578	5	Citron Rho-interacting kinase (CRIK) (EC 2.7.11.1) (Serine/threonine-protein kinase 21)	CIT CRIK KIAA0949 STK21	G2/M transition of mitotic cell cycle [GO:0000086]; generation of neurons [GO:0048699]; Golgi organization [GO:0007030]; intracellular signal transduction [GO:0035556]; mitotic cell cycle [GO:0000278]; mitotic cytokinesis [GO:0000281]; neuron apoptotic process [GO:0051402]; positive regulation of cytokinesis [GO:0032467]; regulation of actin polymerization or depolymerization [GO:0008064]	K16308;	0.35055	0.335098	0.179218	-0.061813	-0.199327	-0.209146	-0.347492	-0.296254	-0.514531	0.00331122	0.990919	0.400657
CTSL2_HUMAN	Q05D32	2	CTD small phosphatase-like protein 2 (CTDSP-like 2) (EC 3.1.3.-)	CTDSPL2 HSPC058 HSPC129	negative regulation of BMP signaling pathway [GO:0030514]; positive regulation of protein export from nucleus [GO:0046827]	K17616;	-0.232682	-0.258883	-0.0891365	-0.453634	0.349536	0.178347	-0.169021	0.244804	0.682868	0.00785446	0.841996	0.586172
CUL1_HUMAN	Q13616	7	Cullin-1 (CUL-1)	CUL1	animal organ morphogenesis [GO:0009887]; cell cycle arrest [GO:0007050]; cell proliferation [GO:0008283]; cellular iron ion homeostasis [GO:0006879]; G1/S transition of mitotic cell cycle [GO:0000082]; G2/M transition of mitotic cell cycle [GO:0000086]; interleukin-1-mediated signaling pathway [GO:0070498]; intrinsic apoptotic signaling pathway [GO:0097193]; negative regulation of cell proliferat…	K03347;	0.100724	0.0248383	0.0670884	0.143492	-0.125752	-0.0324194	-0.0601963	-0.211795	-0.180933	0.0232773	0.85626	0.654113
CUL2_HUMAN	Q13617	11	Cullin-2 (CUL-2)	CUL2	cell cycle arrest [GO:0007050]; G1/S transition of mitotic cell cycle [GO:0000082]; intrinsic apoptotic signaling pathway [GO:0097193]; negative regulation of cell proliferation [GO:0008285]; post-translational protein modification [GO:0043687]; protein ubiquitination [GO:0016567]; regulation of transcription from RNA polymerase II promoter in response to hypoxia [GO:0061418]; ubiquitin-dependent…	K03870;	0.0806527	0.033635	0.0692152	0.0612986	-0.00923475	-0.0717754	-0.0770269	-0.066041	-0.103826	0.1261	0.968775	0.821165
CUL3_HUMAN	Q13618	10	Cullin-3 (CUL-3)	CUL3 KIAA0617	anaphase-promoting complex-dependent catabolic process [GO:0031145]; cell cycle arrest [GO:0007050]; cell migration [GO:0016477]; cell projection organization [GO:0030030]; COPII vesicle coating [GO:0048208]; embryonic cleavage [GO:0040016]; ER to Golgi vesicle-mediated transport [GO:0006888]; fibroblast apoptotic process [GO:0044346]; G1/S transition of mitotic cell cycle [GO:0000082]; gastrulat…	K03869;	-0.0244254	-0.042274	-0.122304	-0.138765	0.0654483	0.0903444	0.0325156	0.0533047	0.122647	0.0596354	0.988285	0.622517
CUL4A_HUMAN	Q13619	6	Cullin-4A (CUL-4A)	CUL4A	cell cycle arrest [GO:0007050]; cellular response to DNA damage stimulus [GO:0006974]; DNA damage response, detection of DNA damage [GO:0042769]; G1/S transition of mitotic cell cycle [GO:0000082]; global genome nucleotide-excision repair [GO:0070911]; hemopoiesis [GO:0030097]; intrinsic apoptotic signaling pathway [GO:0097193]; in utero embryonic development [GO:0001701]; negative regulation of …	K10609;	0.0678518	0.0131328	0.0502548	0.112701	0.0126276	-0.0538299	-0.0602608	0.000569499	-0.074544	0.252561	0.957264	0.658938
CUL4B_HUMAN	Q13620	19	Cullin-4B (CUL-4B)	CUL4B KIAA0695	DNA damage response, detection of DNA damage [GO:0042769]; G1/S transition of mitotic cell cycle [GO:0000082]; global genome nucleotide-excision repair [GO:0070911]; histone H2A monoubiquitination [GO:0035518]; neuron projection development [GO:0031175]; nucleotide-excision repair, DNA damage recognition [GO:0000715]; nucleotide-excision repair, DNA incision [GO:0033683]; nucleotide-excision repa…	K10609;	-0.0841884	-0.0818445	-0.0646502	-0.0616807	0.116527	0.137571	0.0722267	0.0443925	0.150821	0.0580255	0.957264	0.865607
CUL5_HUMAN	Q93034	6	Cullin-5 (CUL-5) (Vasopressin-activated calcium-mobilizing receptor 1) (VACM-1)	CUL5 VACM1	cell cycle arrest [GO:0007050]; cell proliferation [GO:0008283]; cellular response to DNA damage stimulus [GO:0006974]; ERBB2 signaling pathway [GO:0038128]; G1/S transition of mitotic cell cycle [GO:0000082]; intrinsic apoptotic signaling pathway [GO:0097193]; negative regulation of cell proliferation [GO:0008285]; post-translational protein modification [GO:0043687]; ubiquitin-dependent protein…	K10612;	-0.385321	-0.325942	-0.276815	-0.317783	0.200011	0.280663	0.245422	0.217995	0.552261	7.93187e-06	0.978908	0.918995
CUTA_HUMAN	O60888	4	Protein CutA (Acetylcholinesterase-associated protein) (Brain acetylcholinesterase putative membrane anchor)	CUTA ACHAP C6orf82	protein localization [GO:0008104]; response to metal ion [GO:0010038]	K03926;	-0.00297017	0.0257043	0.0400525	0.011039	0.0142967	-0.0291769	-0.0911381	0.00881268	0.0504001	0.468876	0.841996	0.901416
CUX1_HUMAN	P39880	5	Homeobox protein cut-like 1 (CCAAT displacement protein) (CDP) (Homeobox protein cux-1)	CUX1 CUTL1	Golgi vesicle transport [GO:0048193]; multicellular organism development [GO:0007275]; negative regulation of transcription by RNA polymerase II [GO:0000122]; positive regulation of dendrite morphogenesis [GO:0050775]; regulation of transcription by RNA polymerase II [GO:0006357]; retrograde transport, vesicle recycling within Golgi [GO:0000301]; transcription, DNA-templated [GO:0006351]		-0.407249	-0.31672	-0.149022	-0.0800927	0.0653481	0.0359097	0.209041	0.256374	0.310898	0.173956	0.966567	0.54857
CWC15_HUMAN	Q9P013	4	Spliceosome-associated protein CWC15 homolog	CWC15 C11orf5 AD-002 HSPC148	mRNA splicing, via spliceosome [GO:0000398]	K12863;	-0.0376252	0.0750139	-0.00780157	-0.0207696	0.0505831	0.0164663	-0.0118621	-0.0364173	0.0812249	0.279767	0.936547	0.627461
CWC22_HUMAN	Q9HCG8	2	Pre-mRNA-splicing factor CWC22 homolog (Nucampholin homolog) (fSAPb)	CWC22 KIAA1604 NCM	mRNA splicing, via spliceosome [GO:0000398]; regulation of mRNA splicing, via spliceosome [GO:0048024]	K13100;	0.0663181	-0.00880289	0.0602437	0.110377	-0.0895597	0.0202083	-0.151914	0.209763	-0.155213	0.513068	0.981332	0.861424
CWC27_HUMAN	Q6UX04	2	Spliceosome-associated protein CWC27 homolog (Antigen NY-CO-10) (Probable inactive peptidyl-prolyl cis-trans isomerase CWC27 homolog) (PPIase CWC27) (Serologically defined colon cancer antigen 10)	CWC27 SDCCAG10 UNQ438/PRO871	mRNA splicing, via spliceosome [GO:0000398]; protein folding [GO:0006457]	K12737;	0.23073	0.173674	0.134529	0.131827	-0.175889	-0.201198	-0.215754	-0.175471	-0.399312	0.000156965	0.999413	0.901416
CX7A2_HUMAN	P14406	3	Cytochrome c oxidase subunit 7A2, mitochondrial (Cytochrome c oxidase subunit VIIa-liver/heart) (Cytochrome c oxidase subunit VIIa-L) (Cytochrome c oxidase subunit VIIaL)	COX7A2 COX7AL		K02270;	-0.062697	6.90683e-05	-0.108147	-0.174916	0.189382	0.106121	0.0586093	0.0222415	0.219358	0.071035	0.980064	0.65554
CY1_HUMAN	P08574	4	Cytochrome c1, heme protein, mitochondrial (Complex III subunit 4) (Complex III subunit IV) (Cytochrome b-c1 complex subunit 4) (Ubiquinol-cytochrome-c reductase complex cytochrome c1 subunit) (Cytochrome c-1)	CYC1	mitochondrial ATP synthesis coupled proton transport [GO:0042776]; mitochondrial electron transport, ubiquinol to cytochrome c [GO:0006122]; response to glucagon [GO:0033762]	K00413;	0.00634288	-0.0357897	-0.0674528	0.157757	0.0161902	0.0299793	-0.00651337	-0.096853	-0.0560579	0.446364	0.897178	0.813563
CYB5_HUMAN	P00167	2	Cytochrome b5 (Microsomal cytochrome b5 type A) (MCB5)	CYB5A CYB5	L-ascorbic acid metabolic process [GO:0019852]; response to cadmium ion [GO:0046686]		0.139816	-0.0293262	0.127375	0.397152	-0.258302	-0.166063	-0.17984	-0.382857	-0.453033	0.0345841	0.92875	0.804818
CYB5B_HUMAN	O43169	4	Cytochrome b5 type B (Cytochrome b5 outer mitochondrial membrane isoform)	CYB5B CYB5M OMB5	oxidation-reduction process [GO:0055114]		0.105636	0.0269095	0.0923097	0.152755	-0.222915	-0.209472	-0.143425	-0.0545421	-0.300027	0.00166355	0.85626	0.568145
CYBP_HUMAN	Q9HB71	11	Calcyclin-binding protein (CacyBP) (hCacyBP) (S100A6-binding protein) (Siah-interacting protein)	CACYBP S100A6BP SIP PNAS-107	aging [GO:0007568]; cardiac muscle cell differentiation [GO:0055007]; cellular response to calcium ion [GO:0071277]; cellular response to leukemia inhibitory factor [GO:1990830]; negative regulation of cell death [GO:0060548]; positive regulation of DNA replication [GO:0045740]; response to growth hormone [GO:0060416]	K04507;	0.259663	0.209803	0.214331	0.227415	-0.288573	-0.251601	-0.2983	-0.249337	-0.548841	8.17937e-10	0.965861	0.587419
CYC_HUMAN	P99999	7	Cytochrome c	CYCS CYC	activation of cysteine-type endopeptidase activity involved in apoptotic process by cytochrome c [GO:0008635]; cellular respiration [GO:0045333]; cellular response to oxidative stress [GO:0034599]; intrinsic apoptotic signaling pathway [GO:0097193]; mitochondrial electron transport, cytochrome c to oxygen [GO:0006123]; mitochondrial electron transport, ubiquinol to cytochrome c [GO:0006122]; mito…	K08738;	-0.109947	-0.0773719	0.0522905	0.010938	-0.0387574	0.000643144	-0.000714413	0.0284707	0.0647174	0.339574	0.990919	0.441897
CYFP1_HUMAN	Q7L576	24	Cytoplasmic FMR1-interacting protein 1 (Specifically Rac1-associated protein 1) (Sra-1) (p140sra-1)	CYFIP1 KIAA0068	axon extension [GO:0048675]; cellular response to insulin stimulus [GO:0032869]; cognition [GO:0050890]; dendrite extension [GO:0097484]; Fc-gamma receptor signaling pathway involved in phagocytosis [GO:0038096]; lamellipodium assembly [GO:0030032]; modification of synaptic structure [GO:0099563]; negative regulation of synaptic vesicle recycling [GO:1903422]; neutrophil degranulation [GO:0043312…	K05749;	-0.0834953	-0.0119468	-0.0535401	-0.0504174	0.0341637	0.0396062	0.0390698	0.0277498	0.122772	0.0237028	0.997926	0.824993
CYR61_HUMAN	O00622	3	Protein CYR61 (CCN family member 1) (Cysteine-rich angiogenic inducer 61) (Insulin-like growth factor-binding protein 10) (IBP-10) (IGF-binding protein 10) (IGFBP-10) (Protein GIG1)	CYR61 CCN1 GIG1 IGFBP10	anatomical structure morphogenesis [GO:0009653]; apoptotic process involved in heart morphogenesis [GO:0003278]; atrial septum morphogenesis [GO:0060413]; atrioventricular valve morphogenesis [GO:0003181]; cell adhesion [GO:0007155]; cell-cell signaling [GO:0007267]; cell proliferation [GO:0008283]; cellular protein metabolic process [GO:0044267]; chemotaxis [GO:0006935]; chondroblast differentia…	K06829;	0.364788	0.52764	0.653149	0.427423	-1.36326	-0.880728	-0.76103	-1.64941	-1.7396	7.007e-08	0.400857	0.282585
CYTB_HUMAN	P04080	4	Cystatin-B (CPI-B) (Liver thiol proteinase inhibitor) (Stefin-B)	CSTB CST6 STFB	adult locomotory behavior [GO:0008344]; negative regulation of peptidase activity [GO:0010466]; negative regulation of proteolysis [GO:0045861]; neutrophil degranulation [GO:0043312]	K13907;	-0.128111	-0.0148266	-0.0751738	-0.0333274	0.0485579	0.138497	0.041252	-0.0169918	0.241187	0.0389406	0.981332	0.77873
CYTC_HUMAN	P01034	2	Cystatin-C (Cystatin-3) (Gamma-trace) (Neuroendocrine basic polypeptide) (Post-gamma-globulin)	CST3	apoptotic process [GO:0006915]; brain development [GO:0007420]; cellular protein metabolic process [GO:0044267]; cellular response to hydrogen peroxide [GO:0070301]; circadian sleep/wake cycle, REM sleep [GO:0042747]; defense response [GO:0006952]; embryo implantation [GO:0007566]; eye development [GO:0001654]; negative regulation of blood vessel remodeling [GO:0060313]; negative regulation of ce…	K13899;	-0.00395283	-0.0781198	-0.120494	-0.0653175	0.107274	-0.0385103	0.0172402	0.0366491	0.089405	0.290911	0.936547	0.779512
DAAF5_HUMAN	Q86Y56	8	Dynein assembly factor 5, axonemal (HEAT repeat-containing protein 2)	DNAAF5 HEATR2	cilium movement [GO:0003341]; inner dynein arm assembly [GO:0036159]; outer dynein arm assembly [GO:0036158]	K19759;	0.184357	0.0894772	0.207138	0.136703	-0.251572	-0.170181	-0.112901	-0.295751	-0.39484	0.000439008	0.993272	0.71823
DAD1_HUMAN	P61803	3	Dolichyl-diphosphooligosaccharide--protein glycosyltransferase subunit DAD1 (Oligosaccharyl transferase subunit DAD1) (Defender against cell death 1) (DAD-1)	DAD1	apoptotic process [GO:0006915]; blastocyst development [GO:0001824]; negative regulation of apoptotic process [GO:0043066]; protein glycosylation [GO:0006486]; protein N-linked glycosylation [GO:0006487]; protein N-linked glycosylation via asparagine [GO:0018279]; response to drug [GO:0042493]; response to nutrient [GO:0007584]	K12668;	-0.0311884	-0.0524975	-0.0163187	-0.0481344	0.0627087	0.0317115	-0.0178938	-0.0284019	0.0640947	0.377954	0.957264	0.847716
DAZP1_HUMAN	Q96EP5	2	DAZ-associated protein 1 (Deleted in azoospermia-associated protein 1)	DAZAP1	cell differentiation [GO:0030154]; cell proliferation [GO:0008283]; maternal placenta development [GO:0001893]; positive regulation of mRNA splicing, via spliceosome [GO:0048026]; spermatogenesis [GO:0007283]	K14411;	-0.122633	-0.159196	-0.15792	-0.143309	0.0935923	0.0995013	0.127721	0.130532	0.230396	0.00478636	0.998719	0.909455
DBLOH_HUMAN	Q9NR28	5	Diablo homolog, mitochondrial (Direct IAP-binding protein with low pI) (Second mitochondria-derived activator of caspase) (Smac)	DIABLO SMAC	activation of cysteine-type endopeptidase activity involved in apoptotic process [GO:0006919]; activation of cysteine-type endopeptidase activity involved in apoptotic process by cytochrome c [GO:0008635]; apoptotic process [GO:0006915]; extrinsic apoptotic signaling pathway via death domain receptors [GO:0008625]; intrinsic apoptotic signaling pathway [GO:0097193]; positive regulation of apoptot…	K10522;	-0.202671	-0.292035	-0.288789	-0.270971	0.201143	0.229589	0.170585	0.284796	0.360008	0.00107949	0.957264	0.787613
DBNL_HUMAN	Q9UJU6	11	Drebrin-like protein (Cervical SH3P7) (Cervical mucin-associated protein) (Drebrin-F) (HPK1-interacting protein of 55 kDa) (HIP-55) (SH3 domain-containing protein 7)	DBNL CMAP SH3P7 PP5423	activation of JUN kinase activity [GO:0007257]; adaptive immune response [GO:0002250]; neuron projection morphogenesis [GO:0048812]; neutrophil degranulation [GO:0043312]; podosome assembly [GO:0071800]; Rac protein signal transduction [GO:0016601]; receptor-mediated endocytosis [GO:0006898]; ruffle assembly [GO:0097178]; synapse assembly [GO:0007416]	K20520;	0.00716933	0.0125344	-0.0983285	-0.0378643	0.0197755	0.0303768	0.0107224	0.0108094	0.0534398	0.31945	0.990749	0.400657
DBR1_HUMAN	Q9UK59	3	Lariat debranching enzyme (EC 3.1.-.-)	DBR1	mRNA splicing, via spliceosome [GO:0000398]; RNA splicing, via transesterification reactions [GO:0000375]	K18328;	-0.0867677	-0.161773	-0.069546	-0.190047	0.106796	0.0766831	0.0557223	0.124416	0.186489	0.0345841	0.957264	0.71682
DC1I2_HUMAN	Q13409	9	Cytoplasmic dynein 1 intermediate chain 2 (Cytoplasmic dynein intermediate chain 2) (Dynein intermediate chain 2, cytosolic) (DH IC-2)	DYNC1I2 DNCI2 DNCIC2	antigen processing and presentation of exogenous peptide antigen via MHC class II [GO:0019886]; ciliary basal body-plasma membrane docking [GO:0097711]; ER to Golgi vesicle-mediated transport [GO:0006888]; G2/M transition of mitotic cell cycle [GO:0000086]; microtubule-based movement [GO:0007018]; positive regulation of ATP-dependent microtubule motor activity, plus-end-directed [GO:2000582]; reg…	K10415;	-0.00279145	0.0202805	0.00473442	0.0174457	-0.0772633	-0.0292707	-0.0652359	-0.0980157	-0.0584098	0.242343	0.981332	0.988333
DC1L1_HUMAN	Q9Y6G9	9	Cytoplasmic dynein 1 light intermediate chain 1 (LIC1) (Dynein light chain A) (DLC-A) (Dynein light intermediate chain 1, cytosolic)	DYNC1LI1 DNCLI1	antigen processing and presentation of exogenous peptide antigen via MHC class II [GO:0019886]; cell cycle [GO:0007049]; cell division [GO:0051301]; ER to Golgi vesicle-mediated transport [GO:0006888]; microtubule-based movement [GO:0007018]; microtubule cytoskeleton organization [GO:0000226]; neutrophil degranulation [GO:0043312]; positive regulation of mitotic cell cycle spindle assembly checkp…	K10416;	0.293884	0.227832	0.353285	0.344837	-0.345248	-0.426324	-0.357048	-0.396663	-0.651291	9.69418e-08	0.978908	0.365239
DC1L2_HUMAN	O43237	10	Cytoplasmic dynein 1 light intermediate chain 2 (Dynein light intermediate chain 2, cytosolic) (LIC-2) (LIC53/55)	DYNC1LI2 DNCLI2 LIC2	antigen processing and presentation of exogenous peptide antigen via MHC class II [GO:0019886]; cellular response to nerve growth factor stimulus [GO:1990090]; centrosome localization [GO:0051642]; ER to Golgi vesicle-mediated transport [GO:0006888]; microtubule-based movement [GO:0007018]; microtubule cytoskeleton organization [GO:0000226]; protein homooligomerization [GO:0051260]	K10416;	-0.0601721	-0.0568568	-0.0720992	-0.0618375	0.0679889	0.0806606	0.0528732	0.0602331	0.102612	0.212028	0.998718	0.912886
DCA13_HUMAN	Q9NV06	2	DDB1- and CUL4-associated factor 13 (WD repeat and SOF domain-containing protein 1)	DCAF13 WDSOF1 HSPC064	maturation of SSU-rRNA from tricistronic rRNA transcript (SSU-rRNA, 5.8S rRNA, LSU-rRNA) [GO:0000462]; post-translational protein modification [GO:0043687]; protein ubiquitination [GO:0016567]; rRNA processing [GO:0006364]	K11806;	0.0778747	0.0973495	0.283263	0.263308	-0.600973	-0.333268	-0.297873	-0.12133	-0.568848	0.0143926	0.767238	0.400657
DCAF7_HUMAN	P61962	3	DDB1- and CUL4-associated factor 7 (WD repeat-containing protein 68) (WD repeat-containing protein An11 homolog)	DCAF7 HAN11 WDR68	multicellular organism development [GO:0007275]; post-translational protein modification [GO:0043687]; protein ubiquitination [GO:0016567]	K11805;	0.0362604	-0.0333233	0.0407252	0.0471239	0.0284213	0.0818528	-0.0421252	0.0528416	-0.0428026	0.734827	0.978908	0.965747
DCK_HUMAN	P27707	2	Deoxycytidine kinase (dCK) (EC 2.7.1.74)	DCK	purine-containing compound salvage [GO:0043101]; pyrimidine nucleoside salvage [GO:0043097]; pyrimidine nucleotide metabolic process [GO:0006220]	K00893;	-0.0513174	0.0929762	-0.0543651	0.0228553	0.0924842	-0.0909662	0.00784362	0.00622955	0.123514	0.306801	0.936547	0.50859
DCNL1_HUMAN	Q96GG9	4	DCN1-like protein 1 (DCUN1 domain-containing protein 1) (Defective in cullin neddylation protein 1-like protein 1) (Squamous cell carcinoma-related oncogene)	DCUN1D1 DCN1 DCUN1L1 RP42 SCCRO	positive regulation of protein neddylation [GO:2000436]; positive regulation of ubiquitin-protein transferase activity [GO:0051443]; post-translational protein modification [GO:0043687]; protein neddylation [GO:0045116]	K17822;	-0.0628292	-0.12244	-0.093384	-0.154464	0.107223	0.0971832	0.0223942	0.0724813	0.11861	0.097375	0.997926	0.698665
DCP1A_HUMAN	Q9NPI6	4	mRNA-decapping enzyme 1A (EC 3.-.-.-) (Smad4-interacting transcriptional co-activator) (Transcription factor SMIF)	DCP1A SMIF	deadenylation-dependent decapping of nuclear-transcribed mRNA [GO:0000290]; deadenylation-independent decapping of nuclear-transcribed mRNA [GO:0031087]; exonucleolytic nuclear-transcribed mRNA catabolic process involved in deadenylation-dependent decay [GO:0043928]; nuclear-transcribed mRNA catabolic process, nonsense-mediated decay [GO:0000184]; protein localization to cytoplasmic stress granul…	K12610;	-0.179992	-0.838021	-0.137734	-0.368163	0.400613	0.248097	0.15988	0.347928	0.557591	0.0409193	0.932552	0.654141
DCPS_HUMAN	Q96C86	7	m7GpppX diphosphatase (EC 3.6.1.59) (DCS-1) (Decapping scavenger enzyme) (Hint-related 7meGMP-directed hydrolase) (Histidine triad nucleotide-binding protein 5) (Histidine triad protein member 5) (HINT-5) (Scavenger mRNA-decapping enzyme DcpS)	DCPS DCS1 HINT5 HSPC015	cellular response to menadione [GO:0036245]; deadenylation-dependent decapping of nuclear-transcribed mRNA [GO:0000290]; exonucleolytic nuclear-transcribed mRNA catabolic process involved in deadenylation-dependent decay [GO:0043928]; mRNA cis splicing, via spliceosome [GO:0045292]; negative regulation of programmed cell death [GO:0043069]; nuclear-transcribed mRNA catabolic process, deadenylatio…	K12584;	-0.117259	-0.0511505	-0.189761	-0.105062	0.115913	0.134407	0.11042	0.0832549	0.268106	0.00870098	0.988285	0.785089
DCTD_HUMAN	P32321	2	Deoxycytidylate deaminase (EC 3.5.4.12) (dCMP deaminase)	DCTD	dTMP biosynthetic process [GO:0006231]; dUMP biosynthetic process [GO:0006226]; nucleobase-containing small molecule interconversion [GO:0015949]; pyrimidine nucleotide metabolic process [GO:0006220]	K01493;	-0.0910293	-0.0520232	-0.234575	-0.228523	0.166324	0.0792076	0.0949715	0.187666	0.214511	0.0702387	0.981332	0.571366
DCTN1_HUMAN	Q14203	17	Dynactin subunit 1 (150 kDa dynein-associated polypeptide) (DAP-150) (DP-150) (p135) (p150-glued)	DCTN1	antigen processing and presentation of exogenous peptide antigen via MHC class II [GO:0019886]; cell division [GO:0051301]; centriole-centriole cohesion [GO:0010457]; ciliary basal body-plasma membrane docking [GO:0097711]; ER to Golgi vesicle-mediated transport [GO:0006888]; establishment of mitotic spindle orientation [GO:0000132]; G2/M transition of mitotic cell cycle [GO:0000086]; IRE1-mediat…	K04648;	0.0440238	0.00123775	-0.00767718	0.040037	-0.0514196	0.0257323	-0.0552087	0.0129821	-0.0920053	0.11271	0.913278	0.760995
DCTN2_HUMAN	Q13561	12	Dynactin subunit 2 (50 kDa dynein-associated polypeptide) (Dynactin complex 50 kDa subunit) (DCTN-50) (p50 dynamitin)	DCTN2 DCTN50	antigen processing and presentation of exogenous peptide antigen via MHC class II [GO:0019886]; cell proliferation [GO:0008283]; ciliary basal body-plasma membrane docking [GO:0097711]; ER to Golgi vesicle-mediated transport [GO:0006888]; G2/M transition of mitotic cell cycle [GO:0000086]; melanosome transport [GO:0032402]; mitotic cell cycle [GO:0000278]; mitotic spindle organization [GO:0007052…	K10424;	0.0476394	0.118699	0.0637739	0.0562518	-0.0960403	-0.0478473	-0.112017	-0.107846	-0.103075	0.0857757	0.981332	0.536366
DCTN3_HUMAN	O75935	2	Dynactin subunit 3 (Dynactin complex subunit 22 kDa subunit) (p22)	DCTN3 DCTN22	antigen processing and presentation of exogenous peptide antigen via MHC class II [GO:0019886]; ciliary basal body-plasma membrane docking [GO:0097711]; cytoskeleton-dependent cytokinesis [GO:0061640]; ER to Golgi vesicle-mediated transport [GO:0006888]; G2/M transition of mitotic cell cycle [GO:0000086]; microtubule-based process [GO:0007017]; mitotic cell cycle [GO:0000278]; regulation of G2/M …	K10425;	-0.056167	-0.18822	0.124637	0.145958	-0.156475	-0.0910269	-0.00980475	0.0922208	-0.158922	0.325337	0.981332	0.684352
DCTN4_HUMAN	Q9UJW0	6	Dynactin subunit 4 (Dyn4) (Dynactin subunit p62)	DCTN4	antigen processing and presentation of exogenous peptide antigen via MHC class II [GO:0019886]; ER to Golgi vesicle-mediated transport [GO:0006888]; nuclear migration [GO:0007097]	K10426;	-0.0145919	-0.025108	0.0278099	-0.0526446	-0.0253092	0.0735774	0.0600589	0.0468038	-0.0383634	0.615049	0.915082	0.901416
DCTP1_HUMAN	Q9H773	6	dCTP pyrophosphatase 1 (EC 3.6.1.12) (Deoxycytidine-triphosphatase 1) (dCTPase 1) (RS21C6) (XTP3-transactivated gene A protein)	DCTPP1 XTP3TPA CDA03	dCTP catabolic process [GO:0006253]; DNA protection [GO:0042262]; nucleoside triphosphate catabolic process [GO:0009143]; protein homotetramerization [GO:0051289]	K16904;	0.305309	0.301151	0.251837	0.168744	-0.291084	-0.420055	-0.2966	-0.215595	-0.639558	1.49318e-05	0.913278	0.540553
DCUP_HUMAN	P06132	5	Uroporphyrinogen decarboxylase (UPD) (URO-D) (EC 4.1.1.37)	UROD	heme biosynthetic process [GO:0006783]; protoporphyrinogen IX biosynthetic process [GO:0006782]	K01599;	0.101034	0.0956941	0.0996464	0.129251	-0.16015	-0.164941	-0.10055	-0.0797651	-0.213629	0.00239651	0.968344	0.787613
DCXR_HUMAN	Q7Z4W1	5	L-xylulose reductase (XR) (EC 1.1.1.10) (Carbonyl reductase II) (Dicarbonyl/L-xylulose reductase) (Kidney dicarbonyl reductase) (kiDCR) (Short chain dehydrogenase/reductase family 20C member 1) (Sperm surface protein P34H)	DCXR SDR20C1	D-xylose metabolic process [GO:0042732]; glucose metabolic process [GO:0006006]; glucuronate catabolic process to xylulose 5-phosphate [GO:0019640]; NADP metabolic process [GO:0006739]; oxidation-reduction process [GO:0055114]; protein homotetramerization [GO:0051289]; xylulose metabolic process [GO:0005997]	K03331;	-0.0186209	-0.0864332	-0.11554	-0.0416959	0.0841252	0.0846876	0.0979914	0.11359	0.142832	0.090991	0.981332	0.933365
DD19A_HUMAN	Q9NUU7	12	ATP-dependent RNA helicase DDX19A (EC 3.6.4.13) (DDX19-like protein) (DEAD box protein 19A)	DDX19A DDX19L	mRNA transport [GO:0051028]; protein transport [GO:0015031]; regulation of gene expression [GO:0010468]; RNA secondary structure unwinding [GO:0010501]; RNA splicing [GO:0008380]	K18655;	0.0187755	0.058277	0.0794877	0.0460618	-0.103627	-0.11662	-0.0528071	-0.0976087	-0.12529	0.00414342	0.98075	0.793643
DDAH1_HUMAN	O94760	6	N(G),N(G)-dimethylarginine dimethylaminohydrolase 1 (DDAH-1) (Dimethylarginine dimethylaminohydrolase 1) (EC 3.5.3.18) (DDAHI) (Dimethylargininase-1)	DDAH1 DDAH	arginine catabolic process [GO:0006527]; citrulline metabolic process [GO:0000052]; negative regulation of cell proliferation [GO:0008285]; negative regulation of cellular response to hypoxia [GO:1900038]; negative regulation of vascular permeability [GO:0043116]; nitric oxide mediated signal transduction [GO:0007263]; positive regulation of angiogenesis [GO:0045766]; positive regulation of nitri…	K01482;	0.213737	0.0155344	-0.0612535	-0.150649	0.00499836	-0.0425853	-0.114797	0.0134496	-0.26103	0.00829185	0.978908	0.281188
DDAH2_HUMAN	O95865	6	N(G),N(G)-dimethylarginine dimethylaminohydrolase 2 (DDAH-2) (Dimethylarginine dimethylaminohydrolase 2) (EC 3.5.3.18) (DDAHII) (Dimethylargininase-2) (Protein G6a) (S-phase protein)	DDAH2 DDAH G6A NG30	arginine catabolic process [GO:0006527]; citrulline metabolic process [GO:0000052]; negative regulation of apoptotic process [GO:0043066]; nitric oxide biosynthetic process [GO:0006809]; nitric oxide mediated signal transduction [GO:0007263]; positive regulation of nitric oxide biosynthetic process [GO:0045429]; regulation of nitric-oxide synthase activity [GO:0050999]	K01482;	-0.114067	-0.18034	-0.236117	-0.198134	0.241843	0.129786	0.177846	0.0929485	0.359071	3.24122e-05	0.964	0.66829
DDB1_HUMAN	Q16531	36	DNA damage-binding protein 1 (DDB p127 subunit) (DNA damage-binding protein a) (DDBa) (Damage-specific DNA-binding protein 1) (HBV X-associated protein 1) (XAP-1) (UV-damaged DNA-binding factor) (UV-damaged DNA-binding protein 1) (UV-DDB 1) (XPE-binding factor) (XPE-BF) (Xeroderma pigmentosum group E-complementing protein) (XPCe)	DDB1 XAP1	cellular response to DNA damage stimulus [GO:0006974]; DNA damage response, detection of DNA damage [GO:0042769]; DNA repair [GO:0006281]; global genome nucleotide-excision repair [GO:0070911]; histone H2A monoubiquitination [GO:0035518]; interaction with symbiont [GO:0051702]; negative regulation of apoptotic process [GO:0043066]; nucleotide-excision repair [GO:0006289]; nucleotide-excision repa…	K10610;	-0.156305	-0.0959984	-0.136319	-0.138976	0.113214	0.140361	0.0905187	0.140707	0.2737	1.01961e-05	0.993272	0.803729
DDB2_HUMAN	Q92466	4	DNA damage-binding protein 2 (DDB p48 subunit) (DDBb) (Damage-specific DNA-binding protein 2) (UV-damaged DNA-binding protein 2) (UV-DDB 2)	DDB2	DNA repair [GO:0006281]; global genome nucleotide-excision repair [GO:0070911]; histone H2A monoubiquitination [GO:0035518]; nucleotide-excision repair [GO:0006289]; nucleotide-excision repair, DNA damage recognition [GO:0000715]; nucleotide-excision repair, DNA incision [GO:0033683]; nucleotide-excision repair, DNA incision, 5'-to lesion [GO:0006296]; nucleotide-excision repair, preincision comp…	K10140;	-0.976634	-1.00388	-1.05969	-0.985708	0.650847	0.583685	0.510659	0.535202	1.51241	1.81253e-09	0.991814	0.813563
DDI2_HUMAN	Q5TDH0	3	Protein DDI1 homolog 2 (EC 3.4.23.-)	DDI2	protein processing [GO:0016485]	K11885;	-0.150011	-0.188122	-0.327504	-0.310077	0.120665	0.134162	0.286003	0.16248	0.336021	0.00139336	0.951188	0.698665
DDRGK_HUMAN	Q96HY6	4	DDRGK domain-containing protein 1 (Dashurin) (UFM1-binding and PCI domain-containing protein 1)	DDRGK1 C20orf116 UFBP1	cartilage development [GO:0051216]; negative regulation of apoptotic process [GO:0043066]; negative regulation of gene expression [GO:0010629]; negative regulation of proteasomal ubiquitin-dependent protein catabolic process [GO:0032435]; positive regulation of cell cycle G1/S phase transition [GO:1902808]; positive regulation of cell migration [GO:0030335]; positive regulation of cell proliferat…		-0.0398486	-0.149582	-0.0867264	0.015075	0.0247585	0.0271925	0.0872857	0.0468229	0.0862182	0.299612	0.989587	0.45056
DDX1_HUMAN	Q92499	20	ATP-dependent RNA helicase DDX1 (EC 3.6.4.13) (DEAD box protein 1) (DEAD box protein retinoblastoma) (DBP-RB)	DDX1	DNA duplex unwinding [GO:0032508]; double-strand break repair [GO:0006302]; multicellular organism development [GO:0007275]; nucleic acid phosphodiester bond hydrolysis [GO:0090305]; protein localization to cytoplasmic stress granule [GO:1903608]; regulation of transcription, DNA-templated [GO:0006355]; regulation of translational initiation [GO:0006446]; response to exogenous dsRNA [GO:0043330];…	K13177;	0.0686646	0.0428937	0.0456696	0.0116845	-0.0381305	-0.0436255	-0.0195338	-0.029247	-0.101242	0.0497337	0.998718	0.852932
DDX10_HUMAN	Q13206	4	Probable ATP-dependent RNA helicase DDX10 (EC 3.6.4.13) (DEAD box protein 10)	DDX10	anterior head development [GO:0097065]; RNA secondary structure unwinding [GO:0010501]	K14776;	0.174246	0.140847	0.209177	0.158027	-0.23406	-0.247049	-0.17738	-0.148547	-0.489708	0.00367667	0.981332	0.996177
DDX17_HUMAN	Q92841	23	Probable ATP-dependent RNA helicase DDX17 (EC 3.6.4.13) (DEAD box protein 17) (DEAD box protein p72) (DEAD box protein p82) (RNA-dependent helicase p72)	DDX17	alternative mRNA splicing, via spliceosome [GO:0000380]; androgen receptor signaling pathway [GO:0030521]; defense response to virus [GO:0051607]; epithelial to mesenchymal transition [GO:0001837]; gene silencing by RNA [GO:0031047]; intracellular estrogen receptor signaling pathway [GO:0030520]; miRNA metabolic process [GO:0010586]; myoblast differentiation [GO:0045445]; positive regulation of t…	K13178;	-0.179255	-0.181326	-0.212249	-0.230312	0.169364	0.188397	0.174531	0.130588	0.362841	4.32021e-08	0.970538	0.838339
DDX18_HUMAN	Q9NVP1	11	ATP-dependent RNA helicase DDX18 (EC 3.6.4.13) (DEAD box protein 18) (Myc-regulated DEAD box protein) (MrDb)	DDX18 cPERP-D	cellular response to estradiol stimulus [GO:0071392]; RNA secondary structure unwinding [GO:0010501]	K13179;	0.232536	0.228963	0.132993	0.154452	-0.245327	-0.224939	-0.22711	-0.143577	-0.473663	1.88039e-06	0.921812	0.769443
DDX20_HUMAN	Q9UHI6	6	Probable ATP-dependent RNA helicase DDX20 (EC 3.6.4.13) (Component of gems 3) (DEAD box protein 20) (DEAD box protein DP 103) (Gemin-3)	DDX20 DP103 GEMIN3	import into nucleus [GO:0051170]; negative regulation of cell proliferation [GO:0008285]; negative regulation of transcription by RNA polymerase II [GO:0000122]; oogenesis [GO:0048477]; positive regulation of apoptotic process [GO:0043065]; regulation of steroid biosynthetic process [GO:0050810]; RNA processing [GO:0006396]; RNA secondary structure unwinding [GO:0010501]; spliceosomal snRNP assem…	K13131;	0.0562239	0.112527	0.0690911	0.142694	-0.225412	-0.0979375	-0.00185021	-0.038655	-0.250539	0.0754595	0.988285	0.947109
DDX21_HUMAN	Q9NR30	23	Nucleolar RNA helicase 2 (EC 3.6.4.13) (DEAD box protein 21) (Gu-alpha) (Nucleolar RNA helicase Gu) (Nucleolar RNA helicase II) (RH II/Gu)	DDX21	osteoblast differentiation [GO:0001649]; positive regulation of gene expression, epigenetic [GO:0045815]; response to exogenous dsRNA [GO:0043330]; response to virus [GO:0009615]; RNA secondary structure unwinding [GO:0010501]; rRNA processing [GO:0006364]; transcription by RNA polymerase II [GO:0006366]	K16911;	0.265053	0.344856	0.350644	0.371335	-0.500087	-0.504734	-0.433849	-0.314573	-0.77896	1.05321e-06	0.211972	0.766129
DDX23_HUMAN	Q9BUQ8	13	Probable ATP-dependent RNA helicase DDX23 (EC 3.6.4.13) (100 kDa U5 snRNP-specific protein) (DEAD box protein 23) (PRP28 homolog) (U5-100kD)	DDX23	cis assembly of pre-catalytic spliceosome [GO:0000354]; mRNA splicing, via spliceosome [GO:0000398]; RNA secondary structure unwinding [GO:0010501]; RNA splicing [GO:0008380]; RNA splicing, via transesterification reactions [GO:0000375]	K12858;	-0.136346	-0.11154	-0.141445	-0.196602	0.138976	0.110607	0.0949314	0.0977495	0.248133	8.08603e-05	0.997631	0.660833
DDX27_HUMAN	Q96GQ7	18	Probable ATP-dependent RNA helicase DDX27 (EC 3.6.4.13) (DEAD box protein 27)	DDX27 cPERP-F RHLP HSPC259 PP3241	RNA secondary structure unwinding [GO:0010501]; rRNA processing [GO:0006364]	K13181;	0.256462	0.268529	0.247111	0.232353	-0.25658	-0.35396	-0.355674	-0.274548	-0.501038	4.10694e-05	0.981332	0.988605
DDX3X_HUMAN	O00571	27	ATP-dependent RNA helicase DDX3X (EC 3.6.4.13) (DEAD box protein 3, X-chromosomal) (DEAD box, X isoform) (Helicase-like protein 2) (HLP2)	DDX3X DBX DDX3	cellular response to arsenic-containing substance [GO:0071243]; cellular response to osmotic stress [GO:0071470]; chromosome segregation [GO:0007059]; extrinsic apoptotic signaling pathway via death domain receptors [GO:0008625]; innate immune response [GO:0045087]; intracellular signal transduction [GO:0035556]; intrinsic apoptotic signaling pathway [GO:0097193]; mature ribosome assembly [GO:004…	K11594;	0.0533821	0.0522427	0.0878781	0.130724	-0.0974498	-0.107538	-0.127635	-0.0217084	-0.156425	0.00119954	0.85626	0.637444
DDX41_HUMAN	Q9UJV9	2	Probable ATP-dependent RNA helicase DDX41 (EC 3.6.4.13) (DEAD box protein 41) (DEAD box protein abstrakt homolog)	DDX41 ABS	apoptotic process [GO:0006915]; cell differentiation [GO:0030154]; cell proliferation [GO:0008283]; cellular response to interferon-beta [GO:0035458]; defense response to virus [GO:0051607]; mRNA splicing, via spliceosome [GO:0000398]; positive regulation of transcription by RNA polymerase II [GO:0045944]; positive regulation of type I interferon production [GO:0032481]; RNA secondary structure u…	K13116;	0.113709	-0.009736	0.0232114	-0.245213	-0.0900292	0.155695	0.241758	-0.0553288	-0.89256	0.0945462	0.936547	0.718273
DDX42_HUMAN	Q86XP3	19	ATP-dependent RNA helicase DDX42 (EC 3.6.4.13) (DEAD box protein 42) (RNA helicase-like protein) (RHELP) (RNA helicase-related protein) (RNAHP) (SF3b DEAD box protein) (Splicing factor 3B-associated 125 kDa protein) (SF3b125)	DDX42	mRNA splicing, via spliceosome [GO:0000398]; protein localization [GO:0008104]; regulation of apoptotic process [GO:0042981]; RNA secondary structure unwinding [GO:0010501]	K12835;	0.0734587	-0.0158977	-0.0108789	-0.0479256	-0.0245328	-0.0324619	-0.0113385	0.0236122	-0.1018	0.0803889	0.988285	0.520617
DDX46_HUMAN	Q7L014	28	Probable ATP-dependent RNA helicase DDX46 (EC 3.6.4.13) (DEAD box protein 46) (PRP5 homolog)	DDX46 KIAA0801	mRNA splicing, via spliceosome [GO:0000398]; regulation of gene expression [GO:0010468]; RNA secondary structure unwinding [GO:0010501]	K12811;	0.0693113	0.0473282	0.111854	0.128374	-0.112531	-0.114694	-0.145102	-0.0642215	-0.170442	0.00113718	0.936547	0.820703
DDX47_HUMAN	Q9H0S4	10	Probable ATP-dependent RNA helicase DDX47 (EC 3.6.4.13) (DEAD box protein 47)	DDX47	extrinsic apoptotic signaling pathway via death domain receptors [GO:0008625]; mRNA processing [GO:0006397]; RNA secondary structure unwinding [GO:0010501]; RNA splicing [GO:0008380]; rRNA processing [GO:0006364]	K14777;	0.167935	0.178109	0.128962	0.146258	-0.254268	-0.092901	-0.14053	-0.0810017	-0.385645	0.000262569	0.908738	0.955182
DDX49_HUMAN	Q9Y6V7	2	Probable ATP-dependent RNA helicase DDX49 (EC 3.6.4.13) (DEAD box protein 49)	DDX49	RNA secondary structure unwinding [GO:0010501]; rRNA processing [GO:0006364]	K14778;	0.168449	0.219265	0.141726	0.279488	-0.385628	-0.499651	-0.28175	-0.39903	-0.559609	8.83756e-05	0.858436	0.870588
DDX5_HUMAN	P17844	27	Probable ATP-dependent RNA helicase DDX5 (EC 3.6.4.13) (DEAD box protein 5) (RNA helicase p68)	DDX5 G17P1 HELR HLR1	alternative mRNA splicing, via spliceosome [GO:0000380]; androgen receptor signaling pathway [GO:0030521]; BMP signaling pathway [GO:0030509]; epithelial to mesenchymal transition [GO:0001837]; intracellular estrogen receptor signaling pathway [GO:0030520]; intrinsic apoptotic signaling pathway by p53 class mediator [GO:0072332]; mRNA splicing, via spliceosome [GO:0000398]; mRNA transcription [GO…	K12823;	0.00563547	0.10762	0.135746	0.278951	-0.152349	-0.238471	-0.150225	-0.0491559	-0.193697	0.0168521	0.792589	0.262434
DDX50_HUMAN	Q9BQ39	3	ATP-dependent RNA helicase DDX50 (EC 3.6.4.13) (DEAD box protein 50) (Gu-beta) (Nucleolar protein Gu2)	DDX50	RNA secondary structure unwinding [GO:0010501]	K13183;	0.135392	0.0852508	-0.0020148	-0.0335455	-0.115388	-0.0411061	0.0338701	-0.160428	-0.257877	0.0010899	0.734107	0.445825
DDX52_HUMAN	Q9Y2R4	2	Probable ATP-dependent RNA helicase DDX52 (EC 3.6.4.13) (ATP-dependent RNA helicase ROK1-like) (DEAD box protein 52)	DDX52 ROK1 HUSSY-19	RNA secondary structure unwinding [GO:0010501]; rRNA processing [GO:0006364]	K14779;	0.0110762	0.0869656	0.18164	0.292817	-0.174444	-0.268865	0.126706	0.0399349	-0.206509	0.669413	0.913278	0.531522
DDX54_HUMAN	Q8TDD1	2	ATP-dependent RNA helicase DDX54 (EC 3.6.4.13) (ATP-dependent RNA helicase DP97) (DEAD box RNA helicase 97 kDa) (DEAD box protein 54)	DDX54	intracellular estrogen receptor signaling pathway [GO:0030520]; regulation of transcription, DNA-templated [GO:0006355]; RNA metabolic process [GO:0016070]; RNA processing [GO:0006396]; RNA secondary structure unwinding [GO:0010501]; transcription, DNA-templated [GO:0006351]	K14808;	0.17128	0.129786	0.0550602	0.0731473	-0.200744	-0.108231	-0.129339	-0.12404	-0.283963	0.00378286	0.993272	0.853416
DDX56_HUMAN	Q9NY93	7	Probable ATP-dependent RNA helicase DDX56 (EC 3.6.4.13) (ATP-dependent 61 kDa nucleolar RNA helicase) (DEAD box protein 21) (DEAD box protein 56)	DDX56 DDX21 NOH61	positive regulation of neuron projection development [GO:0010976]; RNA secondary structure unwinding [GO:0010501]; rRNA processing [GO:0006364]	K14810;	0.231875	0.226128	0.205147	0.200485	-0.317907	-0.262378	-0.300279	-0.308328	-0.54031	0.00180147	0.991814	0.934611
DDX58_HUMAN	O95786	12	Probable ATP-dependent RNA helicase DDX58 (EC 3.6.4.13) (DEAD box protein 58) (RIG-I-like receptor 1) (RLR-1) (Retinoic acid-inducible gene 1 protein) (RIG-1) (Retinoic acid-inducible gene I protein) (RIG-I)	DDX58	cellular response to exogenous dsRNA [GO:0071360]; cytoplasmic pattern recognition receptor signaling pathway in response to virus [GO:0039528]; defense response to virus [GO:0051607]; detection of virus [GO:0009597]; innate immune response [GO:0045087]; negative regulation of type I interferon production [GO:0032480]; positive regulation of defense response to virus by host [GO:0002230]; positiv…	K12646;	-0.311554	-0.0393203	0.0476771	0.151533	0.11005	0.0365699	0.00535674	0.129095	0.335195	0.0124895	0.966567	0.371327
DDX6_HUMAN	P26196	13	Probable ATP-dependent RNA helicase DDX6 (EC 3.6.4.13) (ATP-dependent RNA helicase p54) (DEAD box protein 6) (Oncogene RCK)	DDX6 HLR2 RCK	cytoplasmic mRNA processing body assembly [GO:0033962]; exonucleolytic nuclear-transcribed mRNA catabolic process involved in deadenylation-dependent decay [GO:0043928]; negative regulation of neuron differentiation [GO:0045665]; regulation of translation [GO:0006417]; RNA secondary structure unwinding [GO:0010501]; spermatid differentiation [GO:0048515]; stem cell population maintenance [GO:0019…	K12614;	-0.0975365	-0.0844292	-0.0806217	-0.0101176	-0.0246335	0.0682691	0.0690034	0.0881909	0.0735529	0.238359	0.936547	0.800046
DECR_HUMAN	Q16698	5	2,4-dienoyl-CoA reductase, mitochondrial (EC 1.3.1.34) (2,4-dienoyl-CoA reductase [NADPH]) (4-enoyl-CoA reductase [NADPH]) (Short chain dehydrogenase/reductase family 18C member 1)	DECR1 DECR SDR18C1	fatty acid beta-oxidation [GO:0006635]; positive regulation of cold-induced thermogenesis [GO:0120162]; protein homotetramerization [GO:0051289]	K13236;	-0.194246	-0.0204819	0.039689	-0.0920107	0.117678	0.0820344	0.161153	-0.127988	0.193368	0.0967241	0.85626	0.432686
DEGS1_HUMAN	O15121	2	Sphingolipid delta(4)-desaturase DES1 (EC 1.14.19.17) (Cell migration-inducing gene 15 protein) (Degenerative spermatocyte homolog 1) (Membrane lipid desaturase)	DEGS1 DES1 MLD MIG15	ceramide biosynthetic process [GO:0046513]; neutrophil degranulation [GO:0043312]; sphingolipid biosynthetic process [GO:0030148]; unsaturated fatty acid biosynthetic process [GO:0006636]	K04712;	-0.609439	0.0812236	-0.0858848	0.275159	0.155777	-0.196252	-0.104799	0.0486414	0.662303	0.00814591	0.954578	0.299006
DEK_HUMAN	P35659	8	Protein DEK	DEK	chromatin remodeling [GO:0006338]; positive regulation of gene expression, epigenetic [GO:0045815]; regulation of double-strand break repair [GO:2000779]; regulation of double-strand break repair via nonhomologous end joining [GO:2001032]; regulation of transcription by RNA polymerase II [GO:0006357]; signal transduction [GO:0007165]; transcription by RNA polymerase II [GO:0006366]; viral genome …	K17046;	-0.127416	-0.149332	-0.165207	-0.0989956	0.110973	0.0773811	0.14793	0.0916304	0.250815	0.000730917	0.991814	0.978636
DEN4C_HUMAN	Q5VZ89	6	DENN domain-containing protein 4C	DENND4C C9orf55 C9orf55B	cellular response to insulin stimulus [GO:0032869]; protein localization to plasma membrane [GO:0072659]; protein transport [GO:0015031]	K20163;	-0.0956657	-0.246462	-0.0737361	-0.108827	0.120739	0.227259	0.242022	0.0502344	0.213577	0.0169602	0.761667	0.543642
DENR_HUMAN	O43583	4	Density-regulated protein (DRP) (Protein DRP1) (Smooth muscle cell-associated protein 3) (SMAP-3)	DENR DRP1 H14	formation of translation preinitiation complex [GO:0001731]; IRES-dependent viral translational initiation [GO:0075522]; ribosome disassembly [GO:0032790]; translation reinitiation [GO:0002188]		-0.0559345	-0.249152	0.0622965	0.0833599	-0.107395	0.0404909	0.105203	-0.00749323	-0.108255	0.616043	0.988285	0.269951
DEOC_HUMAN	Q9Y315	4	Deoxyribose-phosphate aldolase (DERA) (EC 4.1.2.4) (2-deoxy-D-ribose 5-phosphate aldolase) (Phosphodeoxyriboaldolase) (Deoxyriboaldolase)	DERA CGI-26	carbohydrate catabolic process [GO:0016052]; deoxyribonucleoside catabolic process [GO:0046121]; deoxyribonucleotide catabolic process [GO:0009264]; deoxyribose phosphate catabolic process [GO:0046386]; neutrophil degranulation [GO:0043312]; pentose-phosphate shunt [GO:0006098]	K01619;	-0.274073	-0.373777	-0.292488	-0.272659	0.293892	0.19241	0.218202	0.161451	0.54123	6.57162e-05	0.954578	0.942349
DESP_HUMAN	P15924	96	Desmoplakin (DP) (250/210 kDa paraneoplastic pemphigus antigen)	DSP	adherens junction organization [GO:0034332]; bundle of His cell-Purkinje myocyte adhesion involved in cell communication [GO:0086073]; cornification [GO:0070268]; desmosome organization [GO:0002934]; epidermis development [GO:0008544]; intermediate filament organization [GO:0045109]; keratinization [GO:0031424]; keratinocyte differentiation [GO:0030216]; neutrophil degranulation [GO:0043312]; pep…	K10381;	-0.370721	-0.404272	-0.439554	-0.435894	0.353615	0.340163	0.310539	0.302126	0.709219	3.69531e-10	0.991772	0.744452
DEST_HUMAN	P60981	4	Destrin (Actin-depolymerizing factor) (ADF)	DSTN ACTDP DSN	actin filament depolymerization [GO:0030042]; actin filament fragmentation [GO:0030043]; actin filament severing [GO:0051014]; actin polymerization or depolymerization [GO:0008154]; positive regulation of actin filament depolymerization [GO:0030836]	K10363;	0.0614005	0.0682564	0.0764063	-0.00427302	-0.0676099	-0.134253	-0.179075	-0.118719	-0.139326	0.154486	0.981332	0.931612
DFFA_HUMAN	O00273	6	DNA fragmentation factor subunit alpha (DNA fragmentation factor 45 kDa subunit) (DFF-45) (Inhibitor of CAD) (ICAD)	DFFA DFF1 DFF45 H13	apoptotic DNA fragmentation [GO:0006309]; chaperone-mediated protein folding [GO:0061077]; negative regulation of apoptotic DNA fragmentation [GO:1902511]; negative regulation of deoxyribonuclease activity [GO:0032076]; negative regulation of execution phase of apoptosis [GO:1900118]; positive regulation of apoptotic process [GO:0043065]; thymocyte apoptotic process [GO:0070242]	K02310;	0.108454	0.13247	0.0702654	-0.011851	-0.0733874	-0.0866396	-0.0842617	-0.0565301	-0.179739	0.109083	0.993272	0.654141
DGKA_HUMAN	P23743	4	Diacylglycerol kinase alpha (DAG kinase alpha) (EC 2.7.1.107) (80 kDa diacylglycerol kinase) (Diglyceride kinase alpha) (DGK-alpha)	DGKA DAGK DAGK1	diacylglycerol metabolic process [GO:0046339]; glycerolipid metabolic process [GO:0046486]; intracellular signal transduction [GO:0035556]; lipid phosphorylation [GO:0046834]; phosphatidic acid biosynthetic process [GO:0006654]; platelet activation [GO:0030168]; protein kinase C-activating G-protein coupled receptor signaling pathway [GO:0007205]	K00901;	-0.152136	-0.100358	-0.196315	-0.261808	0.135372	0.170992	0.189211	0.121432	0.294771	0.0022156	0.96594	0.705966
DHB12_HUMAN	Q53GQ0	3	Very-long-chain 3-oxoacyl-CoA reductase (EC 1.1.1.330) (17-beta-hydroxysteroid dehydrogenase 12) (17-beta-HSD 12) (3-ketoacyl-CoA reductase) (KAR) (Estradiol 17-beta-dehydrogenase 12) (EC 1.1.1.62) (Short chain dehydrogenase/reductase family 12C member 1)	HSD17B12 SDR12C1	estrogen biosynthetic process [GO:0006703]; extracellular matrix organization [GO:0030198]; fatty acid biosynthetic process [GO:0006633]; long-chain fatty-acyl-CoA biosynthetic process [GO:0035338]; positive regulation of cell-substrate adhesion [GO:0010811]	K10251;	-0.401365	-0.255419	-0.270054	-0.0649931	0.226459	0.252421	0.385454	0.301367	0.611671	7.16933e-05	0.981332	0.553161
[truncated: 2,887 more rows]
